# Supplementary material for: Genetic variation at 11q23.1 confers colorectal cancer risk by dysregulation of colonic tuft cell transcriptional activator POU2AF2
Source: Gut. 2024 Nov 28;74(5):e332121. doi: 10.1136/gutjnl-2024-332121 (PMC12013567; doi:10.1136/gutjnl-2024-332121)
Supplement: online supplemental file 12 [file gutjnl-74-5-s012.xlsx]

## Sheet: Supplementary_Material_3 - SMR 
probeID	ProbeChr	Gene	Probe_bp	topSNP	topSNP_chr	topSNP_bp	A1	A2	Freq	b_GWAS	se_GWAS	p_GWAS	b_eQTL	se_eQTL	p_eQTL	b_SMR	se_SMR	p_SMR	p_HEIDI	nsnp_HEIDI	condition	chuck
ENSG00000131778	1	CHD1L	146714291	rs11239952	1	146715204	G	A	0.957283	0.0167018	0.0125519	0.183314	-0.959598	0.104056	2.918262e-20	-0.017405	0.0132158	0.187845	0.0733676	20	cis	No
ENSG00000143147	1	GPR161	168053997	rs2143415	1	168111495	A	T	0.542017	-0.00392925	0.00666972	0.555782	0.542047	0.0906423	2.230455e-09	-0.00724891	0.0123643	0.557688	0.352932	20	cis	No
ENSG00000117266	1	CDK18	205473723	rs10494870	1	205476189	G	A	0.537582	-0.00194409	0.00648456	0.764328	-0.509458	0.0546318	1.106631e-20	0.003816	0.0127349	0.764446	0.310223	20	cis	No
ENSG00000196188	1	CTSE	206317459	rs74141237	1	205487722	T	C	0.973973	0.0143993	0.0218728	0.510334	-0.562249	0.139551	5.602136e-05	-0.0256102	0.0394182	0.515883	NA	NA	cis	No
ENSG00000261000	1	ENSG00000261000	206677281	rs10836	1	206670169	G	C	0.513539	-0.016561	0.00645832	0.0103388	0.787561	0.0610036	3.949401e-38	-0.0210282	0.00836061	0.011898	0.384926	20	cis	No
ENSG00000084072	1	PPIE	40157854	rs7518431	1	40214944	A	G	0.618931	0.0203653	0.00693188	0.00330423	1.18996	0.033672	1.439315e-273	0.0171143	0.0058454	0.00341349	0.0407857	20	cis	No
ENSG00000198754	1	OXCT2	40235195	rs12410202	1	40001813	C	T	0.846639	-0.00435766	0.0106425	0.682204	0.493804	0.0780108	2.452439e-10	-0.00882468	0.0215971	0.68283	0.457054	6	cis	No
ENSG00000162733	1	DDR2	162601163	rs2806419	1	162717116	G	A	0.0884692	0.00394267	0.0133438	0.767637	0.547783	0.0991154	3.262718e-08	0.0071975	0.0243944	0.767958	0.410403	10	cis	No
ENSG00000088035	1	ALG6	63833261	rs76572066	1	63825490	A	G	0.911415	0.0100951	0.0110924	0.362774	-0.645542	0.12768	4.282567e-07	-0.0156382	0.0174592	0.370415	0.252691	9	cis	No
ENSG00000230679	1	ENO1-AS1	8938894	rs12041676	1	8273392	G	A	0.795635	0.0051249	0.00752251	0.495697	0.436743	0.0991665	1.062041e-05	0.0117344	0.017429	0.500777	0.583224	20	cis	No
ENSG00000009790	1	TRAF3IP3	209929377	rs17381113	1	209595338	G	A	0.929972	0.0197925	0.0167859	0.238352	-0.625651	0.156135	6.146701e-05	-0.031635	0.0279669	0.257988	0.0434596	3	cis	No
ENSG00000170382	1	LRRN2	204586298	rs55636403	1	204648046	A	C	0.788866	-0.0039735	0.00762976	0.602513	0.987681	0.0631404	3.73119e-55	-0.00402306	0.0077292	0.602714	0.664688	20	cis	No
ENSG00000116809	1	ZBTB17	16268364	rs9442226	1	16373823	C	T	0.824056	-0.00440647	0.00891277	0.621024	0.559638	0.124798	7.313916e-06	-0.00787379	0.0160225	0.623128	0.521296	8	cis	No
ENSG00000164002	1	EXO5	40974413	rs6699445	1	40989620	C	T	0.819328	0.00910558	0.00766328	0.234751	0.700564	0.0628531	7.48538e-29	0.0129975	0.0110007	0.237398	0.523816	20	cis	No
ENSG00000187815	1	ZFP69	40942887	rs6600339	1	40940020	A	G	0.683007	0.0116815	0.00694672	0.0926498	-0.541047	0.0579949	1.066622e-20	-0.0215905	0.0130463	0.0979416	0.471029	20	cis	No
ENSG00000238287	1	ENSG00000238287	40958829	rs4660411	1	40953925	G	A	0.682073	0.0105196	0.00681589	0.122736	-0.763606	0.0521478	1.491144e-48	-0.0137762	0.00897537	0.124811	0.644982	20	cis	No
ENSG00000160097	1	FNDC5	33327869	rs1284375	1	33358757	G	C	0.730616	-0.00387986	0.0113775	0.733095	0.285918	0.0660837	1.514242e-05	-0.0135698	0.0399163	0.733889	0.937498	3	cis	No
ENSG00000117748	1	RPA2	28218035	rs17185038	1	28219658	C	G	0.939659	-0.0200978	0.0166476	0.227336	1.73384	0.103065	1.66371e-63	-0.0115915	0.00962627	0.228531	0.689414	17	cis	No
ENSG00000130768	1	SMPDL3B	28261504	rs4908370	1	28244026	C	G	0.541433	-0.000401979	0.00697995	0.954075	-0.516002	0.054594	3.336172e-21	0.000779026	0.0135272	0.954076	0.957338	20	cis	No
ENSG00000142765	1	SYTL1	27668513	rs17257259	1	28223377	T	A	0.949346	-0.00680034	0.016551	0.681166	-0.631908	0.151978	3.212092e-05	0.0107616	0.0263197	0.682628	0.792607	8	cis	No
ENSG00000169403	1	PTAFR	28473677	rs905907	1	28520233	C	G	0.968137	0.0402152	0.0194441	0.038617	-0.974713	0.133436	2.778108e-13	-0.0412585	0.0207327	0.046589	0.0302247	9	cis	No
ENSG00000270605	1	ENSG00000270605	28566020	rs11247759	1	28510330	A	G	0.708333	0.00281922	0.00776976	0.71672	-0.68697	0.0546651	3.211276e-36	-0.00410385	0.0113149	0.716834	0.867104	20	cis	No
ENSG00000179456	1	ZBTB18	244214585	rs61833503	1	244178343	C	T	0.751401	-0.00973989	0.00846092	0.249665	-0.477773	0.108519	1.069219e-05	0.020386	0.0183044	0.265399	0.798813	12	cis	No
ENSG00000116774	1	OLFML3	114522063	rs6702833	1	114521883	C	G	0.30894	0.0103864	0.00729631	0.154589	0.69336	0.0774204	3.373297e-19	0.0149798	0.0106552	0.159764	0.80393	20	cis	No
ENSG00000117500	1	TMED5	93615299	rs1572343	1	93616202	T	C	0.345472	-0.0215581	0.00671874	0.00133358	0.614478	0.0548047	3.554924e-29	-0.0350836	0.011373	0.00203676	0.0771979	20	cis	No
ENSG00000117505	1	DR1	93811445	rs7417952	1	93854186	C	G	0.363817	-0.0300696	0.00986829	0.00231068	-0.718509	0.0499147	5.583776e-47	0.04185	0.0140387	0.00287274	0.36774	20	cis	No
ENSG00000122483	1	CCDC18	93645476	rs61800906	1	93570436	G	T	0.682423	-0.0127667	0.00837666	0.127489	0.460259	0.0612379	5.651356e-14	-0.0277381	0.0185703	0.135259	0.0607959	20	cis	No
ENSG00000223745	1	ENSG00000223745	93727743	rs9432680	1	93761393	G	A	0.806606	0.0033731	0.00914593	0.71227	-0.997102	0.0550642	2.75549e-73	-0.0033829	0.00917441	0.712327	0.00427183	17	cis	No
ENSG00000156869	1	FRRS1	100174259	rs10875253	1	100219435	T	C	0.681022	0.0058407	0.00681152	0.391183	-0.994198	0.0408201	5.054033e-131	-0.00587479	0.00685552	0.391476	0.3528	20	cis	No
ENSG00000162688	1	AGL	100315640	rs12046903	1	100242500	C	G	0.76669	0.0105937	0.00748536	0.156995	-0.44362	0.0625476	1.316918e-12	-0.0238801	0.017206	0.165169	0.302471	20	cis	No
ENSG00000162600	1	OMA1	58881056	rs3813996	1	59011178	T	C	0.292951	0.00473418	0.0125879	0.70685	0.808204	0.0820721	7.028007e-23	0.00585765	0.0155865	0.707054	0.190582	20	cis	No
ENSG00000184908	1	CLCNKB	16370272	rs2863435	1	16369876	C	T	0.505964	0.0170307	0.00675807	0.0117337	0.691699	0.0509182	4.948808e-42	0.0246215	0.00993694	0.0132203	0.744998	20	cis	No
ENSG00000197312	1	DDI2	15943995	rs7545107	1	15997115	C	G	0.754318	-0.0180577	0.00807285	0.0252968	-0.483551	0.063703	3.181445e-14	0.0373439	0.0174047	0.0319031	0.549013	20	cis	No
ENSG00000186063	1	AIDA	222841355	rs3008635	1	222851014	G	A	0.0274276	-0.0144991	0.0150358	0.334892	0.9519	0.176048	6.406796e-08	-0.0152317	0.0160448	0.342455	0.0165823	16	cis	No
ENSG00000117054	1	ACADM	76190036	rs4949674	1	76213715	C	A	0.700047	-0.00838855	0.00785241	0.285396	0.891265	0.0528251	7.230906e-64	-0.00941196	0.00882805	0.286359	0.202401	20	cis	No
ENSG00000184005	1	ST6GALNAC3	76540404	rs17606806	1	76504931	G	A	0.672852	-0.00320215	0.00756368	0.672034	0.992947	0.0471863	2.642752e-98	-0.0032249	0.00761895	0.672096	0.602506	20	cis	No
ENSG00000162836	1	ACP6	147101453	rs12045115	1	147118181	T	C	0.44106	-0.00568089	0.0064533	0.378692	0.981092	0.039643	3.245527e-135	-0.00579037	0.00658183	0.378994	0.00848656	20	cis	No
ENSG00000143653	1	SCCPDH	246887349	rs35570407	1	246889490	A	G	0.907446	0.0204013	0.0108277	0.0595397	-0.71689	0.0806089	5.924881e-19	-0.0284581	0.015439	0.0652906	0.0404895	20	cis	No
ENSG00000117697	1	NSL1	212899495	rs55840547	1	212937165	C	T	0.847106	-0.020872	0.00925823	0.0241696	0.76878	0.0665534	7.269256e-31	-0.0271495	0.01227	0.0269197	0.549351	20	cis	No
ENSG00000198468	1	FLVCR1-DT	213025450	rs11120057	1	213051804	A	G	0.440126	-0.0159993	0.00643416	0.0128963	1.10855	0.0346769	3.042378e-224	-0.0144326	0.00582166	0.0131703	0.603066	20	cis	No
ENSG00000218283	1	ENSG00000218283	220426912	rs11118299	1	219590274	T	C	0.762955	-0.00977759	0.00897789	0.276121	-0.387709	0.109579	0.000402892	0.0252189	0.0242284	0.297931	0.16418	7	cis	No
ENSG00000269887	1	ENSG00000269887	164649322	rs2800805	1	164649216	G	A	0.0745798	-0.00046904	0.0137811	0.972849	0.601244	0.119271	4.631487e-07	-0.000780116	0.0229215	0.97285	0.0801462	3	cis	No
ENSG00000010165	1	EEF1AKNMT	171750788	rs11583530	1	171677177	T	C	0.690943	0.00116942	0.0068857	0.865141	-0.510362	0.0944465	6.527368e-08	-0.00229135	0.0134985	0.865207	0.534317	20	cis	No
ENSG00000117533	1	VAMP4	171669300	rs12119232	1	171711152	A	C	0.802988	0.00121885	0.00815471	0.881186	0.566388	0.0887841	1.778028e-10	0.00215197	0.0144017	0.881219	0.451177	10	cis	No
ENSG00000197959	1	DNM3	171810621	rs3753538	1	171749558	A	G	0.735177	0.0117124	0.00694827	0.0918612	-0.520451	0.0604653	7.471926e-18	-0.0225043	0.0136041	0.0980801	0.665048	20	cis	No
ENSG00000117595	1	IRF6	209959036	rs6675890	1	210022893	G	C	0.264472	-0.00172075	0.00754924	0.819695	0.538041	0.108942	7.860722e-07	-0.00319818	0.0140459	0.819884	0.217413	20	cis	No
ENSG00000203666	1	EFCAB2	245133007	rs59260431	1	245126010	A	C	0.51774	-0.00135233	0.00698869	0.846565	-1.04245	0.0354351	3.182435e-190	0.00129726	0.00670425	0.846569	0.391354	20	cis	No
ENSG00000131233	1	GJA9	39330175	rs115250200	1	40255053	G	A	0.967904	0.00671055	0.0234539	0.774788	-0.807035	0.203289	7.190539e-05	-0.00831507	0.0291372	0.775356	NA	NA	cis	No
ENSG00000183386	1	FHL3	38462442	rs61776719	1	38461319	C	A	0.455999	-0.0561416	0.0066878	4.67372e-17	-0.44066	0.052788	6.95889e-17	0.127403	0.0215236	3.234185e-09	0.0222657	18	cis	No
ENSG00000007341	1	ST7L	113066140	rs10745330	1	113083439	C	T	0.530929	-0.0108147	0.00645894	0.0940564	0.842772	0.0483184	3.956563e-68	-0.0128323	0.00769916	0.0955711	0.572559	20	cis	No
ENSG00000116489	1	CAPZA1	113161795	rs2932537	1	113230394	A	G	0.178338	0.00556341	0.00893883	0.533688	-0.34604	0.088464	9.166902e-05	-0.0160774	0.0261567	0.538783	0.732235	12	cis	No
ENSG00000142599	1	RERE	8412457	rs61783008	1	9689452	C	T	0.995215	-0.0107061	0.0162647	0.510381	0.962727	0.226936	2.212529e-05	-0.0111206	0.0170966	0.515396	NA	NA	cis	No
ENSG00000153904	1	DDAH1	85784164	rs423105	1	85796427	A	G	0.628268	0.0114007	0.00681597	0.0943983	-0.438325	0.0919041	1.847981e-06	-0.0260097	0.0164786	0.114475	0.235042	20	cis	No
ENSG00000060688	1	SNRNP40	31732417	rs615080	1	30879917	A	C	0.844304	0.00613674	0.00842586	0.466416	-0.444093	0.126176	0.000432134	-0.0138186	0.0193752	0.475714	NA	NA	cis	No
ENSG00000130764	1	LRRC47	3696784	rs2996426	1	3701491	A	G	0.442344	0.000230156	0.00663302	0.97232	0.298641	0.0741601	5.649881e-05	0.000770678	0.0222115	0.972321	0.338077	13	cis	No
ENSG00000212916	1	MAP10	232940643	rs1495986	1	232937739	T	C	0.766573	-0.0028049	0.00722305	0.697775	-0.621125	0.0584093	2.070161e-26	0.00451584	0.0116367	0.697966	0.259399	20	cis	No
ENSG00000273367	1	ENSG00000273367	234507932	rs908320	1	235061973	T	C	0.688842	0.00475555	0.00688126	0.489511	-0.263103	0.060968	1.592929e-05	-0.0180749	0.0264875	0.494991	NA	NA	cis	No
ENSG00000185839	1	AK2P1	59096513	rs17116836	1	58537102	G	A	0.959617	-0.0255283	0.0183989	0.165292	1.06862	0.244725	1.26186e-05	-0.023889	0.0180657	0.186055	0.231642	3	cis	No
ENSG00000234807	1	ENSG00000234807	59250823	rs75358325	1	58603765	T	C	0.966036	0.0113365	0.0205993	0.582088	-0.77635	0.214775	0.000300671	-0.0146023	0.0268393	0.586397	NA	NA	cis	No
ENSG00000237352	1	ENSG00000237352	59522315	rs2764922	1	59485277	G	A	0.612512	0.00701741	0.00702686	0.317962	0.471025	0.0568776	1.217529e-16	0.0148982	0.0150263	0.321455	0.054984	20	cis	No
ENSG00000197147	1	LRRC8B	89990395	rs922107	1	90022796	A	G	0.461134	0.00686607	0.00661666	0.299412	0.625985	0.0518035	1.285785e-33	0.0109684	0.0106089	0.301188	0.721581	20	cis	No
ENSG00000143590	1	EFNA3	155036224	rs1870939	1	155055496	A	G	0.416667	-0.0115026	0.00717462	0.108882	-0.38261	0.0553448	4.738161e-12	0.0300635	0.0192494	0.118338	0.710479	20	cis	No
ENSG00000160766	1	GBAP1	155183616	rs2974935	1	155181843	G	T	0.476143	0.00342128	0.0068282	0.616335	-0.81767	0.0445229	2.497897e-75	-0.00418418	0.00835391	0.616466	0.259338	20	cis	No
ENSG00000169242	1	EFNA1	155099936	rs28409746	1	154305843	C	T	0.532446	-0.004059	0.00641618	0.526982	0.253123	0.0733356	0.000557336	-0.0160357	0.0257703	0.533775	NA	NA	cis	No
ENSG00000116350	1	SRSF4	29474255	rs28526732	1	30033473	A	G	0.723506	0.00560426	0.00738136	0.447706	0.311674	0.0688214	5.933698e-06	0.0179812	0.0240135	0.453981	NA	NA	cis	No
ENSG00000116353	1	MECR	29519385	rs4110942	1	29337802	A	G	0.912465	0.00121383	0.012627	0.923418	-0.714352	0.105111	1.074419e-11	-0.0016992	0.0176779	0.923425	0.0426501	14	cis	No
ENSG00000127481	1	UBR4	19401000	rs10916957	1	19437185	G	T	0.839286	-0.0124668	0.00940947	0.185197	0.732648	0.0699462	1.131982e-25	-0.0170161	0.0129454	0.188696	0.394109	20	cis	No
ENSG00000143771	1	CNIH4	224544552	rs34791963	1	224662703	T	C	0.74148	0.0208235	0.00792825	0.0086268	-0.880723	0.0499667	1.55054e-69	-0.0236436	0.00910137	0.00938201	0.222859	20	cis	No
ENSG00000143195	1	ILDR2	166882443	rs3753914	1	167022701	A	G	0.577731	0.0141183	0.00642609	0.0280188	0.604796	0.0881242	6.743245e-12	0.0233439	0.0111564	0.0364005	0.00116854	20	cis	No
ENSG00000142632	1	ARHGEF19	16524349	rs221045	1	16530049	C	T	0.262838	0.0350536	0.00772803	5.73588e-06	-1.14273	0.0426727	5.686822e-158	-0.0306753	0.00685911	7.741822e-06	0.315395	20	cis	No
ENSG00000179743	1	FLJ37453	16160560	rs10803401	1	16147377	G	A	0.651261	-0.00645544	0.00747237	0.387638	-0.430136	0.0551326	6.101098e-15	0.0150079	0.0174783	0.390528	0.0768153	20	cis	No
ENSG00000186301	1	ENSG00000186301	16972069	rs279784	1	16780060	C	T	0.7088	0.0148595	0.00757477	0.0497961	0.589059	0.0604375	1.907969e-22	0.0252258	0.013117	0.0544621	0.815113	20	cis	No
ENSG00000162706	1	CADM3	159141399	rs167818	1	158645329	T	A	0.972106	0.0153079	0.0248438	0.537786	0.746612	0.208158	0.000334813	0.0205032	0.0337628	0.543672	NA	NA	cis	No
ENSG00000143153	1	ATP1B1	169074935	rs2051144	1	169042021	C	G	0.449463	0.00521046	0.00720928	0.469837	0.579041	0.0858371	1.52173e-11	0.00899843	0.0125216	0.472369	0.129006	18	cis	No
ENSG00000123689	1	G0S2	209848765	rs56948998	1	209854954	A	T	0.79225	-0.0121017	0.00856612	0.157731	-0.446292	0.0648761	6.021349e-12	0.0271161	0.0195946	0.166402	0.0060553	12	cis	No
ENSG00000065243	1	PKN2	89149905	rs11588602	1	89103729	T	C	0.60796	-0.00496984	0.00651016	0.445226	-0.550481	0.0559283	7.376094e-23	0.00902818	0.0118618	0.44659	0.0515324	20	cis	No
ENSG00000117226	1	GBP3	89472349	rs12146148	1	89471892	C	T	0.678922	-0.00338863	0.00714196	0.635167	-1.2118	0.0374514	1.12015e-229	0.00279636	0.00589431	0.635203	0.083171	20	cis	No
ENSG00000137944	1	KYAT3	89401456	rs12729558	1	89402960	C	G	0.505719	-0.0104093	0.00637635	0.102576	-0.920673	0.042116	6.18584e-106	0.0113062	0.00694503	0.103535	0.0391484	20	cis	No
ENSG00000137947	1	GTF2B	89318615	rs670636	1	88780970	C	G	0.242414	-0.00536177	0.0103995	0.606148	-0.308505	0.0651899	2.218758e-06	0.0173798	0.0339088	0.608268	0.166474	11	cis	No
ENSG00000213516	1	RBMXL1	89445139	rs10922534	1	89457697	T	C	0.755467	0.0240986	0.013102	0.0658706	0.677771	0.097302	3.269048e-12	0.0355557	0.0199936	0.0753457	0.628694	6	cis	No
ENSG00000241975	1	ENSG00000241975	89294785	rs6679817	1	89363264	C	T	0.641457	-0.0103622	0.00670605	0.122296	-0.535399	0.0939961	1.226727e-08	0.0193542	0.012978	0.135882	0.208683	20	cis	No
ENSG00000137968	1	SLC44A5	75667816	rs1614816	1	75839298	C	G	0.485528	-0.00996854	0.00713845	0.162577	-0.982544	0.0390772	1.657388e-139	0.0101456	0.00727647	0.163224	0.734514	20	cis	No
ENSG00000142798	1	HSPG2	22148738	rs4654773	1	22252262	A	G	0.147993	0.0106549	0.00845548	0.207626	0.997626	0.112904	9.917393e-19	0.0106803	0.00856136	0.212216	0.00428528	20	cis	No
ENSG00000219073	1	CELA3B	22303514	rs3806296	1	22313469	G	C	0.704771	-0.0299327	0.0104108	0.00403816	-0.629583	0.0884182	1.075228e-12	0.0475437	0.0178332	0.00767543	0.29508	20	cis	No
ENSG00000133048	1	CHI3L1	203148059	rs10399931	1	203156080	T	C	0.237395	-0.0125106	0.0073588	0.0891147	0.512768	0.0622427	1.748174e-16	-0.0243982	0.0146535	0.0959122	0.284689	8	cis	No
ENSG00000163485	1	ADORA1	203059782	rs4950932	1	203174864	T	C	0.80077	0.00760086	0.00762027	0.318545	0.302485	0.0719073	2.592483e-05	0.0251281	0.0258907	0.331776	0.587086	6	cis	No
ENSG00000174567	1	GOLT1A	204167288	rs4951138	1	204820426	T	C	0.979225	0.00175546	0.0275559	0.949205	-1.50322	0.344613	1.28847e-05	-0.0011678	0.0183332	0.94921	0.70617	4	cis	No
ENSG00000090020	1	SLC9A1	27425306	rs35838702	1	27490493	G	A	0.633637	0.00182362	0.00722422	0.800708	-0.398548	0.0579431	6.058479e-12	-0.00457566	0.0181386	0.800839	0.889055	20	cis	No
ENSG00000090273	1	NUDC	27226729	rs140439223	1	27231508	A	G	0.928105	0.0048163	0.0143064	0.736378	-0.625304	0.149549	2.898943e-05	-0.00770233	0.0229532	0.737197	0.738392	9	cis	No
ENSG00000198746	1	GPATCH3	27216979	rs143678380	1	27394429	C	T	0.883698	0.00226781	0.0204794	0.911826	0.494935	0.144701	0.000625292	0.00458204	0.0413996	0.911872	NA	NA	cis	No
ENSG00000117676	1	RPS6KA1	26856252	rs813203	1	26108394	A	G	0.230159	-0.0199825	0.00919298	0.0297302	-0.317527	0.0847789	0.000180139	0.0629317	0.0334744	0.0601088	NA	NA	cis	No
ENSG00000117682	1	DHDDS	26758773	rs12046614	1	26851729	A	C	0.7905	0.0034507	0.00757891	0.648891	-0.430857	0.0719258	2.094552e-09	-0.00800892	0.0176411	0.649833	0.96754	20	cis	No
ENSG00000142751	1	GPN2	27202624	rs3001256	1	26783528	T	C	0.94958	0.00363569	0.0154337	0.813767	0.594325	0.16757	0.000390064	0.00611734	0.0260257	0.81417	NA	NA	cis	No
ENSG00000116641	1	DOCK7	62920399	rs636523	1	62920008	A	G	0.640873	-0.00516559	0.00717501	0.471561	-0.476304	0.0774509	7.760319e-10	0.0108452	0.0151668	0.474573	0.149794	19	cis	No
ENSG00000164008	1	C1orf50	43232940	rs17385526	1	43238031	A	G	0.748483	-0.00492863	0.0082964	0.552466	-0.847077	0.0718208	4.175897e-32	0.0058184	0.00980657	0.55297	0.208077	20	cis	No
ENSG00000177868	1	SVBP	43272723	rs12030508	1	43230212	A	T	0.679622	-0.00197135	0.00778504	0.800096	0.824892	0.0522212	3.309022e-56	-0.00238983	0.00943886	0.800121	0.0824842	20	cis	No
ENSG00000011007	1	ELOA	24069645	rs4649184	1	24423609	C	T	0.711251	0.0120489	0.00836826	0.149916	-0.298017	0.0822712	0.000291912	-0.0404302	0.0302167	0.180893	NA	NA	cis	No
ENSG00000011009	1	LYPLA2	24117460	rs6660675	1	24395003	T	G	0.452848	-0.00103415	0.00647688	0.873143	-0.351443	0.0869557	5.307992e-05	0.00294258	0.0184438	0.873241	0.402059	5	cis	No
ENSG00000169504	1	CLIC4	25071848	rs1002707	1	25051102	C	T	0.745915	-0.012067	0.00731506	0.0990235	-0.409961	0.106948	0.000126457	0.0294345	0.0194254	0.129707	0.631529	7	cis	No
ENSG00000117602	1	RCAN3	24829387	rs638833	1	24852429	T	C	0.527428	0.00693768	0.00657725	0.291516	0.465004	0.0940401	7.624514e-07	0.0149196	0.0144627	0.302264	0.87343	14	cis	No
ENSG00000133226	1	SRRM1	24958207	rs1005733	1	25261960	T	A	0.422736	-0.000769803	0.00661826	0.907403	0.413015	0.0941739	1.156329e-05	-0.00186386	0.0160299	0.907435	0.425435	3	cis	No
ENSG00000117862	1	TXNDC12	52485803	rs72668680	1	53240377	G	A	0.975724	0.0250174	0.0301685	0.40696	-1.03677	0.272164	0.000139325	-0.0241301	0.02978	0.41778	NA	NA	cis	No
ENSG00000143001	1	TMEM61	55446465	rs2495517	1	55448842	A	G	0.211951	-0.00760632	0.0111387	0.494686	-0.570533	0.0632501	1.876159e-19	0.013332	0.0195792	0.495919	0.95063	16	cis	No
ENSG00000117222	1	RBBP5	205055270	rs7546850	1	205059066	G	A	0.515406	-0.00518986	0.00701588	0.459464	-0.361028	0.0567462	1.989434e-10	0.0143752	0.019564	0.462473	0.069044	20	cis	No
ENSG00000174529	1	TMEM81	205052258	rs7546850	1	205059066	G	A	0.515406	-0.00518986	0.00701588	0.459464	-0.424185	0.0559407	3.382776e-14	0.0122349	0.0166182	0.461587	0.0318007	20	cis	No
ENSG00000162408	1	NOL9	6581407	rs4908927	1	6623122	G	T	0.135154	-0.019038	0.00949228	0.044896	0.672509	0.12058	2.442746e-08	-0.0283089	0.0149996	0.0591188	0.394827	18	cis	No
ENSG00000143436	1	MRPL9	151732119	rs75061466	1	151733874	C	G	0.884454	0.0287216	0.0114328	0.0119977	0.403978	0.111155	0.00027866	0.0710969	0.0344036	0.0387761	0.179281	3	cis	No
ENSG00000159445	1	THEM4	151846060	rs9943281	1	151878223	G	T	0.388072	0.0101767	0.00657292	0.121556	0.789614	0.0455948	3.437754e-67	0.0128882	0.00835742	0.123043	0.733154	20	cis	No
ENSG00000067208	1	EVI5	92974253	rs4294422	1	93104655	G	A	0.367297	-0.0290125	0.00741691	9.16621e-05	-0.566241	0.0549572	6.808267e-25	0.051237	0.0140107	0.000255197	0.220685	20	cis	No
ENSG00000122484	1	RPAP2	92764522	rs11583491	1	93463949	C	T	0.627801	0.0220773	0.00756932	0.0035377	0.312646	0.0590612	1.199339e-07	0.0706144	0.0276422	0.0106315	0.508326	18	cis	No
ENSG00000154511	1	DIPK1A	93307724	rs11164855	1	93466960	T	C	0.515056	0.019007	0.00647666	0.00333881	0.714242	0.0862838	1.254521e-16	0.0266114	0.00962088	0.00567471	0.377812	20	cis	No
ENSG00000162676	1	GFI1	92940319	rs7530780	1	93130268	C	T	0.374183	-0.0299298	0.00730524	4.1847e-05	0.256237	0.0725949	0.000416061	-0.116805	0.0436795	0.00749213	NA	NA	cis	No
ENSG00000157181	1	ODR4	186344890	rs113280938	1	186322242	T	C	0.908964	0.0165505	0.0128647	0.198266	0.513179	0.119027	1.62196e-05	0.0322509	0.0261609	0.217653	0.0316313	9	cis	No
ENSG00000229739	1	PDC-AS1	186420213	rs34459464	1	186500338	G	A	0.867297	0.00350091	0.00848536	0.679913	0.525879	0.0783583	1.930134e-11	0.00665725	0.016166	0.680482	0.363619	17	cis	No
ENSG00000196660	1	SLC30A10	219858769	rs74139245	1	220108449	T	C	0.92437	-0.00653482	0.0121726	0.591373	-0.568996	0.104287	4.868397e-08	0.0114848	0.0214964	0.593157	0.950069	10	cis	No
ENSG00000117594	1	HSD11B1	209859510	rs10863793	1	210037420	G	A	0.621148	-0.0126371	0.00659385	0.0553021	-0.338168	0.0721197	2.745631e-06	0.0373693	0.0210646	0.076057	0.773111	10	cis	No
ENSG00000131584	1	ACAP3	1227756	rs307371	1	1273116	A	G	0.0681606	-0.0390805	0.0112446	0.000509925	0.514395	0.0880625	5.181076e-09	-0.0759737	0.0254366	0.00281925	0.383342	20	cis	No
ENSG00000215790	1	SLC35E2A	1656277	rs3935032	1	1564194	C	T	0.637255	0.00281877	0.0092614	0.760856	0.804563	0.0881477	7.01371e-20	0.00350348	0.0115175	0.760985	0.795993	20	cis	No
ENSG00000228327	1	ENSG00000228327	700237	rs2340589	1	864755	A	G	0.00816993	-0.00383656	0.0260856	0.883072	0.675896	0.105582	1.537132e-10	-0.00567626	0.0386043	0.883103	0.497486	13	cis	No
ENSG00000235098	1	ANKRD65	1353800	rs4970372	1	1352941	A	G	0.921919	0.0315459	0.0119149	0.00810655	-1.1286	0.0738776	1.094903e-52	-0.0279514	0.0107146	0.00908836	0.091782	20	cis	No
ENSG00000053371	1	AKR7A2	19630459	rs4911983	1	19638090	G	C	0.806723	-0.00404985	0.00818448	0.620726	0.502397	0.0699882	7.057591e-13	-0.00806106	0.0163295	0.621554	0.852521	15	cis	No
ENSG00000159423	1	ALDH4A1	19197926	rs6426814	1	19204173	A	G	0.222456	-0.0125211	0.00930393	0.178373	0.479454	0.106865	7.239233e-06	-0.0261153	0.0202595	0.197383	0.777855	5	cis	No
ENSG00000162482	1	AKR7A3	19609052	rs61764885	1	19579994	C	T	0.844188	-0.0162822	0.00935785	0.0818671	-0.625933	0.0812579	1.328659e-14	0.0260127	0.0153269	0.0896601	0.210202	20	cis	No
ENSG00000270728	1	ENSG00000270728	19623574	rs7525784	1	19635377	C	T	0.825514	-0.0091792	0.00906009	0.31099	0.294419	0.0730775	5.604846e-05	-0.0311773	0.0317309	0.325826	0.341061	10	cis	No
ENSG00000143178	1	TBX19	168250278	rs12564492	1	168234645	G	A	0.296218	0.00742682	0.00681292	0.275666	-0.407373	0.0588331	4.3839e-12	-0.018231	0.01693	0.28155	0.862915	19	cis	No
ENSG00000213064	1	SFT2D2	168195176	rs6673571	1	168224359	C	T	0.323179	0.00748565	0.00666792	0.261592	0.585375	0.0917155	1.74212e-10	0.0127878	0.0115657	0.268872	0.96916	16	cis	No
ENSG00000084070	1	SMAP2	40810522	rs3013462	1	40827598	T	C	0.553922	0.00441106	0.00648635	0.496471	0.39118	0.0919587	2.101109e-05	0.0112763	0.0167921	0.501886	0.354684	9	cis	No
ENSG00000143158	1	MPC2	167885967	rs73024138	1	167920626	C	A	0.905696	-0.00698373	0.0115594	0.545738	-1.02036	0.0918388	1.117407e-28	0.00684438	0.0113455	0.54633	0.169288	20	cis	No
ENSG00000116791	1	CRYZ	75171170	rs28831813	1	75209522	G	A	0.452264	0.00675101	0.00739878	0.361532	-0.744258	0.0458272	2.606913e-59	-0.00907079	0.00995683	0.362289	0.720461	20	cis	No
ENSG00000155816	1	FMN2	240177648	rs12756148	1	240395537	G	A	0.595355	-0.00809032	0.00709791	0.254362	-0.320805	0.073911	1.422088e-05	0.0252188	0.0228755	0.270271	0.0530192	12	cis	No
ENSG00000233355	1	CHRM3-AS2	239866684	rs12030687	1	239896458	C	T	0.938959	0.00930977	0.0126585	0.462061	-1.46764	0.107741	2.965393e-42	-0.00634336	0.00863763	0.462713	0.202482	20	cis	No
ENSG00000117154	1	IGSF21	18434240	rs9729921	1	18528567	G	A	0.489729	0.0021642	0.00661811	0.743658	0.404407	0.0880589	4.380498e-06	0.00535154	0.0164064	0.744284	0.719567	10	cis	No
ENSG00000238061	1	ENSG00000238061	185249976	rs7539575	1	185238669	G	A	0.582049	-0.00603806	0.00646076	0.350008	-0.395985	0.0565545	2.526318e-12	0.0152482	0.0164604	0.35426	0.0938617	20	cis	No
ENSG00000066056	1	TIE1	43766664	rs3768046	1	43766426	A	G	0.38387	0.00879463	0.00698427	0.207956	0.41004	0.057027	6.466086e-13	0.0214482	0.0172924	0.214854	0.066289	20	cis	No
ENSG00000066322	1	ELOVL1	43829068	rs839993	1	43803120	C	A	0.614379	-0.014582	0.00709732	0.0399191	-0.263722	0.0580581	5.562208e-06	0.0552931	0.029537	0.0612079	0.139787	17	cis	No
ENSG00000159479	1	MED8	43849588	rs7513293	1	43952955	T	C	0.975724	0.0220493	0.0241377	0.360992	-0.685774	0.1475	3.330299e-06	-0.0321524	0.0358707	0.37007	0.285733	3	cis	No
ENSG00000179178	1	TMEM125	43735665	rs3120044	1	43771090	G	A	0.385854	0.00874739	0.00694979	0.208155	0.335096	0.0581425	8.245544e-09	0.0261041	0.0212285	0.21882	0.358884	18	cis	No
ENSG00000234694	1	ENSG00000234694	43820355	rs7520981	1	43760070	T	C	0.619281	-0.00771517	0.00706835	0.275049	-0.30609	0.0732113	2.903432e-05	0.0252056	0.0238664	0.290917	0.481879	8	cis	No
ENSG00000116266	1	STXBP3	109289296	rs7553437	1	109289804	T	C	0.220238	0.00701694	0.00762252	0.357283	-0.685961	0.0623772	3.951224e-28	-0.0102294	0.011151	0.358962	0.798423	20	cis	No
ENSG00000237413	1	MGC27382	78695283	rs597063	1	78670931	C	T	0.809407	0.0148138	0.00788095	0.0601496	0.594287	0.110167	6.874773e-08	0.024927	0.0140432	0.0758941	0.959672	20	cis	No
ENSG00000226415	1	ENSG00000226415	77165474	rs77155558	1	77318003	G	A	0.981443	0.0120546	0.0250523	0.630391	0.768594	0.185516	3.42781e-05	0.015684	0.0328141	0.632675	0.60558	3	cis	No
ENSG00000230325	1	ENSG00000230325	236703394	rs2758997	1	236711810	A	G	0.24253	0.0195341	0.00715634	0.00634064	-0.703665	0.079357	7.508419e-19	-0.0277605	0.0106411	0.00908581	0.824849	20	cis	No
ENSG00000177888	1	ZBTB41	197122810	rs2786114	1	197302717	T	C	0.100373	0.00516357	0.0121226	0.670148	0.501825	0.0882949	1.319593e-08	0.0102896	0.0242248	0.671016	0.720236	15	cis	No
ENSG00000171612	1	SLC25A33	9599541	rs72646718	1	9617682	G	A	0.839519	-0.00387349	0.00834357	0.64247	-0.541103	0.120998	7.749191e-06	0.00715851	0.0155024	0.644249	0.986203	18	cis	No
ENSG00000117091	1	CD48	160648536	rs352684	1	160681775	A	G	0.430789	0.00498801	0.00834455	0.550002	0.494122	0.0843479	4.680787e-09	0.0100947	0.0169753	0.552065	0.555069	7	cis	No
ENSG00000116213	1	WRAP73	3547331	rs6697769	1	3570883	C	T	0.509687	0.00651062	0.00683531	0.340844	0.812062	0.0476985	5.368416e-65	0.00801739	0.00843039	0.341599	0.370316	20	cis	No
ENSG00000238260	1	ENSG00000238260	3539754	rs112629950	1	4287392	G	A	0.969421	0.00441552	0.0228659	0.846877	0.855122	0.208212	4.008808e-05	0.00516361	0.0267695	0.847044	NA	NA	cis	No
ENSG00000081870	1	HSPB11	54382247	rs7537364	1	54382648	T	C	0.876517	-0.0052414	0.0102134	0.60782	-0.448634	0.0745765	1.790493e-09	0.011683	0.0228482	0.609119	0.358403	13	cis	No
ENSG00000116209	1	TMEM59	54497347	rs10888834	1	54600471	T	C	0.145892	0.00944007	0.0102657	0.357794	-0.345694	0.0929368	0.000199486	-0.0273076	0.0305899	0.372018	0.727683	5	cis	No
ENSG00000177000	1	MTHFR	11845780	rs1023252	1	11899033	G	T	0.725257	-0.00816428	0.0074574	0.273609	0.700684	0.0592603	2.939402e-32	-0.0116519	0.0106886	0.275658	0.225381	20	cis	No
ENSG00000135750	1	KCNK1	233749750	rs701234	1	233803982	C	G	0.127101	-0.00620531	0.00890523	0.485918	-0.485728	0.102242	2.02626e-06	0.0127753	0.0185299	0.490546	0.715142	6	cis	No
ENSG00000033122	1	LRRC7	70034081	rs1417438	1	70151123	A	G	0.483101	0.00351673	0.00641552	0.583582	-0.356391	0.0707066	4.645092e-07	-0.00986762	0.0181075	0.58579	0.551671	8	cis	No
ENSG00000213057	1	C1orf220	178511887	rs11806608	1	178511375	T	C	0.617414	0.00367995	0.00654546	0.57397	-0.521168	0.0739565	1.828737e-12	-0.00706097	0.0125991	0.575184	0.581659	20	cis	No
ENSG00000224687	1	RASAL2-AS1	178060643	rs10913500	1	178052913	G	A	0.792367	0.0180785	0.00806328	0.0249562	0.455027	0.0847232	7.840993e-08	0.0397306	0.0192026	0.0385436	0.268102	20	cis	No
ENSG00000066185	1	ZMYND12	42896000	rs12401746	1	42985503	C	T	0.836134	-0.0064539	0.0086159	0.453815	-0.674435	0.0719659	7.144654e-21	0.00956934	0.0128157	0.455252	0.198359	20	cis	No
ENSG00000117399	1	CDC20	43824626	rs12140516	1	42850354	G	T	0.552521	-0.0136632	0.00676424	0.0433916	-0.27637	0.073811	0.000180901	0.0494381	0.0278096	0.0754477	0.385877	4	cis	No
ENSG00000177181	1	RIMKLA	42846466	rs6677163	1	42877218	G	A	0.76564	0.00675315	0.00793645	0.394823	0.47207	0.114866	3.96121e-05	0.0143054	0.0171686	0.404714	0.183429	4	cis	No
ENSG00000198815	1	FOXJ3	42642210	rs571329	1	42660356	G	A	0.749416	-0.00520211	0.00735034	0.479108	0.49389	0.065662	5.406796e-14	-0.0105329	0.0149483	0.481044	0.085832	19	cis	No
ENSG00000134247	1	PTGFRN	117452679	rs2622366	1	118078875	C	T	0.714402	-0.0118794	0.0068588	0.0832751	-0.414623	0.10391	6.600994e-05	0.0286511	0.0180334	0.11211	NA	NA	cis	No
ENSG00000136636	1	KCTD3	215740735	rs4846531	1	216729267	G	A	0.545401	0.00151261	0.0081635	0.853002	0.370415	0.0944072	8.723904e-05	0.00408355	0.0220634	0.853164	NA	NA	cis	No
ENSG00000117228	1	GBP1	89518002	rs1329115	1	89562606	A	G	0.31606	0.00979614	0.00706396	0.16551	-0.349983	0.075735	3.816105e-06	-0.0279903	0.021073	0.184093	0.223136	20	cis	No
ENSG00000162645	1	GBP2	89571815	rs6659239	1	89500185	G	A	0.555556	0.00383132	0.00658409	0.560631	0.484275	0.0930958	1.972627e-07	0.00791146	0.0136806	0.563063	0.46906	20	cis	No
ENSG00000234518	1	ENSG00000234518	89569968	rs4614240	1	90563334	G	C	0.49006	-0.0255625	0.0110414	0.0206045	0.240261	0.0554873	1.490979e-05	-0.106395	0.0521123	0.0411871	0.2231	3	cis	No
ENSG00000160679	1	CHTOP	153606525	rs28700217	1	153605260	G	A	0.461485	0.00760305	0.00649068	0.241446	0.629526	0.0531524	2.3172e-32	0.0120774	0.0103607	0.243739	0.623285	20	cis	No
ENSG00000160712	1	IL6R	154377669	rs12117832	1	154397610	A	G	0.420635	-0.0170423	0.00651854	0.0089374	-0.633603	0.0518507	2.438445e-34	0.0268974	0.0105209	0.0105708	0.378589	20	cis	No
ENSG00000163239	1	TDRD10	154474695	rs113915076	1	154508812	G	A	0.80894	0.0234282	0.00830177	0.00477153	-0.711309	0.0798467	5.176036e-19	-0.0329367	0.0122427	0.00713861	0.801799	20	cis	No
ENSG00000169291	1	SHE	154442248	rs76401668	1	154610358	G	A	0.979108	0.00755018	0.0274654	0.783394	1.17745	0.307937	0.00013148	0.00641232	0.0233864	0.783938	NA	NA	cis	No
ENSG00000198771	1	RCSD1	167599330	rs28641593	1	167586861	C	T	0.356443	0.0212922	0.00663426	0.00132999	0.44635	0.0567701	3.768127e-15	0.0477029	0.016054	0.00296439	0.724333	20	cis	No
ENSG00000121766	1	ZCCHC17	31769842	rs4531329	1	31817810	A	T	0.385037	0.00257387	0.00691516	0.709739	0.433208	0.0559517	9.745557e-15	0.00594142	0.0159811	0.710059	0.572992	20	cis	No
ENSG00000121769	1	FABP3	31838472	rs6689037	1	31809655	A	G	0.214869	0.00393658	0.00740117	0.594805	0.358047	0.0894734	6.288536e-05	0.0109946	0.0208527	0.59802	0.863509	9	cis	No
ENSG00000168528	1	SERINC2	31882412	rs1934290	1	31884180	T	C	0.565476	0.000894894	0.00680965	0.895447	-0.430202	0.0551022	5.840417e-15	-0.00208017	0.0158312	0.895461	0.388748	20	cis	No
ENSG00000163399	1	ATP1A1	116915290	rs71666794	1	117028743	A	T	0.890289	-0.00440637	0.0141558	0.75559	0.565338	0.158017	0.000346613	-0.00779422	0.0251341	0.756481	NA	NA	cis	No
ENSG00000196187	1	TMEM63A	226033237	rs360075	1	226087883	C	T	0.366013	-0.00479302	0.00674665	0.477438	-0.506243	0.0928174	4.919813e-08	0.00946782	0.0134395	0.481135	0.341708	19	cis	No
ENSG00000203685	1	STUM	226736501	rs6675179	1	227332043	T	C	0.0689776	-0.0173231	0.0101124	0.0867017	0.696761	0.187594	0.000203853	-0.0248623	0.0159827	0.119809	NA	NA	cis	No
ENSG00000223396	1	ENSG00000223396	201487831	rs9628675	1	201473388	C	T	0.295285	0.0124869	0.00745922	0.0941258	-0.691681	0.0544559	5.787503e-37	-0.018053	0.0108774	0.0969808	0.0981598	20	cis	No
ENSG00000224536	1	LOC107985246	201476369	rs3753982	1	201477613	T	G	0.303455	0.0126385	0.0074493	0.0897718	-0.719707	0.0536756	5.395373e-41	-0.0175606	0.010433	0.0923399	0.10419	20	cis	No
ENSG00000116874	1	WARS2	119573839	rs146862216	1	119600175	G	A	0.754085	-0.0184762	0.00821534	0.024513	-1.04945	0.0519758	1.171359e-90	0.0176056	0.00787664	0.0254065	0.00262302	20	cis	No
ENSG00000231365	1	WARS2-AS1	119683019	rs61806982	1	119719686	T	C	0.722664	-0.0143612	0.00793727	0.0703983	-1.15843	0.0425984	7.604496e-163	0.0123971	0.0068669	0.0710206	0.240239	20	cis	No
ENSG00000158488	1	CD1E	158323254	rs9729737	1	158322083	T	C	0.785288	0.0316373	0.0168693	0.0607331	0.300243	0.0577121	1.967001e-07	0.105372	0.0597248	0.0776819	0.0356577	17	cis	No
ENSG00000272668	1	LOC107985216	159836744	rs11587021	1	159825916	C	T	0.605626	-0.00695472	0.00712105	0.328746	1.18566	0.0316058	5.446528e-308	-0.0058657	0.00600801	0.32891	0.315281	20	cis	No
ENSG00000116584	1	ARHGEF2	155916630	rs34455078	1	155087411	G	A	0.873249	-0.00302076	0.0114308	0.791576	0.543431	0.142861	0.000142433	-0.00555868	0.0210852	0.792065	0.556743	4	cis	No
ENSG00000132680	1	KHDC4	155882834	rs750439	1	156430749	C	T	0.327498	-0.00728645	0.00679838	0.283814	0.378395	0.0984581	0.000121436	-0.0192562	0.0186519	0.301886	NA	NA	cis	No
ENSG00000132698	1	RAB25	156030951	rs915179	1	156078249	A	G	0.596172	-0.00164285	0.00703893	0.815455	0.475351	0.0975506	1.099919e-06	-0.00345608	0.0148248	0.815662	0.479828	4	cis	No
ENSG00000143622	1	RIT1	155867599	rs490498	1	155880952	G	A	0.333917	0.00258397	0.0072091	0.72002	0.446635	0.0524711	1.709387e-17	0.00578542	0.0161552	0.720258	0.0398128	20	cis	No
ENSG00000118454	1	ANKRD13C	70726271	rs765642	1	70787953	G	A	0.913515	0.0143833	0.0117666	0.221563	-0.797241	0.173282	4.20832e-06	-0.0180413	0.0152712	0.237445	0.0895257	12	cis	No
ENSG00000016602	1	CLCA4	87012761	rs57683437	1	86576893	G	A	0.884692	0.00395303	0.00900752	0.660764	0.441754	0.104485	2.35875e-05	0.00894849	0.0204999	0.662464	NA	NA	cis	No
ENSG00000143633	1	C1orf131	231359509	rs4658911	1	231427220	C	T	0.870448	0.0245281	0.0101932	0.0161144	-0.368308	0.0872747	2.441919e-05	-0.0665967	0.0318588	0.0365844	0.341704	3	cis	No
ENSG00000118194	1	TNNT2	201328136	rs6679659	1	201527781	C	T	0.914566	0.0149733	0.0100833	0.137553	-0.395627	0.113616	0.000497395	-0.037847	0.0277076	0.171957	NA	NA	cis	No
ENSG00000176393	1	RNPEP	201951500	rs10800803	1	201947772	G	A	0.682773	-0.000211973	0.00693245	0.975607	0.75274	0.056273	8.287356e-41	-0.000281602	0.00920964	0.975607	0.105141	20	cis	No
ENSG00000117174	1	ZNHIT6	86115106	rs11161650	1	86176945	C	G	0.560458	-0.0079038	0.00642317	0.218505	0.958238	0.0413658	1.027047e-118	-0.00824826	0.00671256	0.219154	0.989641	20	cis	No
ENSG00000183291	1	SELENOF	87328132	rs55946540	1	87396789	G	A	0.916667	-0.00398025	0.0132435	0.763762	0.536791	0.0930296	7.922076e-09	-0.0074149	0.0247051	0.764073	0.986349	20	cis	No
ENSG00000162631	1	NTNG1	107682629	rs115668827	1	107678268	G	C	0.951914	-0.0128101	0.0181764	0.480956	1.75384	0.1106	1.247545e-56	-0.00730403	0.010374	0.481389	0.844148	20	cis	No
ENSG00000198890	1	PRMT6	107599267	rs1730850	1	107597988	C	T	0.345822	-0.0203277	0.0068983	0.00321107	0.826549	0.0667595	3.312112e-35	-0.0245935	0.00857904	0.00414786	0.847932	20	cis	No
ENSG00000213058	1	ENSG00000213058	178380751	rs114918315	1	177873667	C	G	0.95775	-0.0197942	0.0197669	0.316644	0.971351	0.273304	0.000379267	-0.020378	0.0211422	0.335119	NA	NA	cis	No
ENSG00000182004	1	SNRPE	203830731	rs12731771	1	203760656	G	A	0.865313	-0.00169237	0.0106018	0.873173	0.680876	0.0970778	2.320704e-12	-0.00248558	0.0155749	0.873205	0.451862	20	cis	No
ENSG00000240219	1	ENSG00000240219	204595903	rs72753876	1	204621241	G	A	0.575547	0.0163138	0.00647155	0.0117072	0.250731	0.0569686	1.076481e-05	0.065065	0.0297446	0.0287096	0.401376	6	cis	No
ENSG00000257315	1	ZBED6	203765437	rs4951083	1	204582730	A	G	0.293534	0.00594531	0.00758867	0.433365	-0.331561	0.081837	5.089434e-05	-0.0179313	0.0233117	0.441777	0.151257	4	cis	No
ENSG00000143248	1	RGS5	163080911	rs2940673	1	163193850	C	T	0.266223	-0.000803542	0.00723517	0.911568	0.308693	0.0618433	5.990038e-07	-0.00260305	0.0234439	0.91159	0.743317	13	cis	No
ENSG00000122481	1	RWDD3	95699711	rs62625008	1	95702582	A	G	0.920868	-0.0174283	0.0131254	0.184235	1.21943	0.0994002	1.347401e-34	-0.0142922	0.0108264	0.186795	0.00787534	20	cis	No
ENSG00000231992	1	ENSG00000231992	95585703	rs2797616	1	95429915	C	T	0.477241	0.0162087	0.00681743	0.0174289	0.349297	0.0925298	0.000160028	0.0464038	0.023066	0.044243	0.122606	8	cis	No
ENSG00000117215	1	PLA2G2D	20438432	rs617180	1	20439313	C	G	0.464402	-0.0168493	0.00704003	0.0166952	0.287862	0.0732954	8.586036e-05	-0.0585326	0.0286396	0.0409767	0.93476	5	cis	No
ENSG00000232995	1	RGS5	163214295	rs12731546	1	163216224	A	G	0.820845	-0.000370551	0.00922899	0.967973	-1.00176	0.0634772	4.177016e-56	0.0003699	0.00921281	0.967973	0.821334	20	cis	No
ENSG00000143185	1	XCL2	168510003	rs1040508	1	168500750	C	T	0.646359	-0.00426677	0.0068522	0.533491	-0.489557	0.0548163	4.226856e-19	0.00871557	0.0140307	0.534482	0.780739	20	cis	No
ENSG00000159346	1	ADIPOR1	202909951	rs12078831	1	202966967	C	A	0.970005	0.00195778	0.0110145	0.858922	0.522925	0.137536	0.000143484	0.0037439	0.0210863	0.859075	NA	NA	cis	No
ENSG00000198860	1	TSEN15	184020811	rs765224	1	184015663	G	A	0.912932	0.0163235	0.0113958	0.152025	0.584059	0.0776562	5.432206e-14	0.0279484	0.0198621	0.159391	0.0504241	20	cis	No
ENSG00000142794	1	NBPF3	21766621	rs10916990	1	21763132	T	A	0.446662	0.008287	0.0067081	0.216692	-1.00907	0.0435899	1.48207e-118	-0.00821251	0.00665726	0.217346	0.460662	20	cis	No
ENSG00000133056	1	PIK3C2B	204391756	rs16853666	1	204403856	T	C	0.777894	-0.0162738	0.00729431	0.0256792	0.317769	0.0652154	1.10137e-06	-0.0512127	0.0252465	0.042509	0.0305158	12	cis	No
ENSG00000116783	1	TNNI3K	74663947	rs792323	1	74707594	C	T	0.857853	-0.0211803	0.0177734	0.233385	-1.07882	0.0820331	1.678517e-39	0.0196328	0.0165424	0.235298	0.00618883	7	cis	No
ENSG00000162620	1	LRRIQ3	74491699	rs792310	1	74665493	G	A	0.514472	-0.00277003	0.0065339	0.671604	-0.948857	0.0406351	1.356529e-120	0.00291933	0.00688721	0.671655	0.185327	20	cis	No
ENSG00000254685	1	FPGT	74663896	rs792307	1	74669000	C	T	0.514356	-0.00312619	0.00653112	0.63218	-0.814572	0.0456265	2.737079e-71	0.00383783	0.00802074	0.632302	0.120685	20	cis	No
ENSG00000234741	1	GAS5	173833038	rs146786952	1	174514535	C	G	0.922386	-0.0288787	0.0104476	0.00570702	0.738943	0.106213	3.470744e-12	-0.0390811	0.0152136	0.0102044	0.549299	20	cis	No
ENSG00000117600	1	PLPPR4	99729509	rs57979133	1	99824812	A	G	0.911415	-0.0178978	0.0100456	0.0748038	-0.426625	0.0904604	2.403438e-06	0.0419521	0.0251709	0.0955762	0.145514	13	cis	No
ENSG00000143353	1	LYPLAL1	219347186	rs75060212	1	219345611	T	G	0.885387	0.00339958	0.00892086	0.703142	0.43075	0.0879615	9.729719e-07	0.00789223	0.0207727	0.703995	0.26074	20	cis	No
ENSG00000094975	1	SUCO	172501489	rs12760161	1	172497874	A	G	0.660598	0.0117003	0.00718948	0.103648	-0.61066	0.0553278	2.529689e-28	-0.0191601	0.0119006	0.107395	0.0308709	20	cis	No
ENSG00000163879	1	DNALI1	38022520	rs2294875	1	38052445	C	T	0.399393	-0.0108804	0.00662209	0.100374	-0.620563	0.051557	2.286195e-33	0.0175331	0.0107701	0.103536	0.487492	20	cis	No
ENSG00000172456	1	FGGY	59762310	rs2179662	1	60213519	A	G	0.187442	-0.0112171	0.00854154	0.189101	-0.477938	0.0944012	4.130548e-07	0.0234698	0.0184631	0.203667	0.894317	12	cis	No
ENSG00000116717	1	GADD45A	68150744	rs2025609	1	67422990	C	G	0.145191	-0.0400838	0.00986573	4.84605e-05	0.392392	0.10281	0.000135254	-0.102152	0.0367219	0.00540602	NA	NA	cis	No
ENSG00000116704	1	SLC35D1	67465015	rs12060309	1	67604219	T	C	0.699697	0.000854168	0.00696702	0.902422	-0.397626	0.0606611	5.568723e-11	-0.00214817	0.0175246	0.902439	0.494351	13	cis	No
ENSG00000162594	1	IL23R	67632083	rs12060309	1	67604219	T	C	0.699697	0.000854168	0.00696702	0.902422	-0.393587	0.0608215	9.724102e-11	-0.00217021	0.0177045	0.90244	0.263309	10	cis	No
ENSG00000132122	1	SPATA6	48761044	rs2275309	1	48937691	A	T	0.573996	-0.00114112	0.00665426	0.863841	0.638705	0.0828426	1.259576e-14	-0.00178662	0.0104209	0.863874	0.883516	20	cis	No
ENSG00000272491	1	ENSG00000272491	48693560	rs2275309	1	48937691	A	T	0.573996	-0.00114112	0.00665426	0.863841	0.72875	0.0500263	4.533027e-48	-0.00156586	0.00913169	0.86385	0.822926	20	cis	No
ENSG00000135749	1	PCNX2	233119181	rs1072497	1	233209354	A	C	0.786415	-0.00346753	0.0078148	0.65725	0.302631	0.0664453	5.2489e-06	-0.0114579	0.0259451	0.658762	0.838317	5	cis	No
ENSG00000135778	1	NTPCR	233086351	rs6673130	1	233081593	C	T	0.777894	-0.0085003	0.00763422	0.265517	1.12143	0.052305	5.637046e-102	-0.00757988	0.00681675	0.26616	0.895253	20	cis	No
ENSG00000229657	1	RPL13AP11	204915736	rs4951129	1	204796564	A	T	0.89916	-0.00587537	0.0090867	0.517898	0.612206	0.0998609	8.755514e-10	-0.00959705	0.0149249	0.520209	0.0385302	15	cis	No
ENSG00000049239	1	H6PD	9294834	rs11121349	1	9295794	G	C	0.587418	-0.00209068	0.00659154	0.75111	-0.713997	0.0487218	1.259324e-48	0.00292814	0.00923405	0.751166	0.126792	20	cis	No
ENSG00000236137	1	LOC101929099	117568104	rs1555794	1	117602077	C	T	0.407913	0.00601895	0.00654501	0.357769	-0.465724	0.0890192	1.67937e-07	-0.0129239	0.0142689	0.365075	0.044601	8	cis	No
ENSG00000142583	1	SLC2A5	9095166	rs1705297	1	9126111	G	T	0.605509	-0.00566439	0.00658261	0.389509	0.293289	0.0593231	7.656394e-07	-0.0193133	0.0227815	0.39657	0.131873	12	cis	No
ENSG00000143162	1	CREG1	167498914	rs2984803	1	167526051	A	C	0.568588	0.00125899	0.0100093	0.899905	-0.478553	0.05693	4.242453e-17	-0.00263083	0.0209181	0.899916	0.971724	12	cis	No
ENSG00000117122	1	MFAP2	17300997	rs9435659	1	17313343	G	A	0.475023	-0.00373811	0.00652469	0.5667	0.433239	0.0630612	6.414078e-12	-0.00862829	0.0151125	0.568043	0.541318	20	cis	No
ENSG00000143196	1	DPT	168664697	rs2744666	1	168737147	A	G	0.682773	0.000876929	0.00703446	0.900791	-0.334364	0.062822	1.024072e-07	-0.00262268	0.0210441	0.900818	0.952664	12	cis	No
ENSG00000188015	1	S100A3	153519805	rs1005436	1	153521932	G	A	0.881419	-0.0170194	0.013235	0.198462	0.547673	0.0866549	2.612889e-10	-0.0310758	0.024661	0.207626	0.183771	5	cis	No
ENSG00000196154	1	S100A4	153516089	rs58298199	1	152908814	A	C	0.501984	0.00812536	0.00649883	0.211197	0.288271	0.0735292	8.836709e-05	0.0281865	0.0236628	0.233585	0.0752721	12	cis	No
ENSG00000171729	1	TMEM51	15479028	rs1316277	1	15539953	C	T	0.830999	0.000699755	0.00798622	0.930178	-0.617585	0.0918613	1.780009e-11	-0.00113305	0.0129325	0.930184	0.00941883	20	cis	No
ENSG00000189337	1	KAZN	14925200	rs114942212	1	14687561	C	T	0.949697	0.0185608	0.0116041	0.10971	-0.639149	0.142048	6.810908e-06	-0.0290399	0.0192686	0.131782	0.750894	3	cis	No
ENSG00000162373	1	BEND5	49193195	rs116379434	1	49121417	C	T	0.973039	-0.0260475	0.0247988	0.293555	-0.866774	0.228506	0.000148704	0.0300511	0.0296871	0.311413	NA	NA	cis	No
ENSG00000261326	1	ENSG00000261326	23607802	rs12030145	1	24478518	T	A	0.827731	-0.00877713	0.00777397	0.258881	0.445559	0.121985	0.000259624	-0.0196991	0.0182622	0.280729	0.473995	3	cis	No
ENSG00000058085	1	LAMC2	183155373	rs2276543	1	183155305	G	A	0.715103	-0.034559	0.00721876	1.68969e-06	0.49076	0.0794907	6.666738e-10	-0.0704193	0.0186136	0.00015481	2.708565e-07	20	cis	No
ENSG00000135862	1	LAMC1	182992595	rs10752893	1	183046261	C	T	0.586018	-0.0699434	0.00650112	5.39487e-27	-0.607258	0.0961831	2.726847e-10	0.115179	0.0211524	5.17458e-08	3.926367e-08	20	cis	No
ENSG00000143333	1	RGS16	182567758	rs535334	1	182598174	C	T	0.864963	0.00632871	0.00848928	0.455973	0.604364	0.0809652	8.362237e-14	0.0104717	0.0141165	0.458206	0.353614	13	cis	No
ENSG00000229956	1	ENSG00000229956	71547007	rs7545836	1	71565920	A	G	0.894024	0.00636563	0.0119335	0.593739	0.5083	0.0974027	1.803359e-07	0.0125234	0.0235996	0.595654	0.450051	11	cis	No
ENSG00000174371	1	EXO1	242011269	rs142887679	1	242655898	G	A	0.990896	-0.00651948	0.0405994	0.872424	-1.10946	0.273139	4.867838e-05	0.00587626	0.0366224	0.872522	NA	NA	cis	No
ENSG00000152104	1	PTPN14	214522039	rs67483753	1	214716169	G	C	0.772176	-0.000557396	0.00786815	0.943523	-0.571821	0.109933	1.976494e-07	0.000974774	0.0137611	0.943529	0.780901	20	cis	No
ENSG00000116138	1	DNAJC16	15853308	rs12691551	1	15907908	C	G	0.620565	0.0215273	0.00658072	0.00107069	0.342432	0.0583525	4.401954e-09	0.0628659	0.0220018	0.0042725	0.0203815	20	cis	No
ENSG00000116771	1	AGMAT	15898848	rs7546951	1	15855344	G	A	0.476307	0.0123331	0.00640402	0.0541254	-0.583693	0.088796	4.917273e-11	-0.0211294	0.0114327	0.0645802	0.148969	17	cis	No
ENSG00000132906	1	CASP9	15817327	rs4645978	1	15852034	C	T	0.486083	0.0291941	0.00954143	0.00221546	0.759261	0.0496792	9.882126e-53	0.0384507	0.0128161	0.00269815	0.00217042	20	cis	No
ENSG00000132694	1	ARHGEF11	156904632	rs75000987	1	156858049	C	G	0.833002	0.00147317	0.0114157	0.89732	0.473068	0.0736721	1.351498e-10	0.00311408	0.0241361	0.89734	0.432999	5	cis	No
ENSG00000160785	1	SLC25A44	156163880	rs2247476	1	156190280	C	A	0.708217	-0.000642871	0.00790644	0.935196	-0.60763	0.0593877	1.431599e-24	0.001058	0.0130123	0.935198	0.569863	20	cis	No
ENSG00000085998	1	POMGNT1	46654354	rs6429566	1	45941852	T	C	0.263189	-0.0142457	0.00807103	0.0775566	0.346523	0.0933527	0.000205646	-0.0411104	0.0257905	0.110933	0.52044	3	cis	No
ENSG00000117450	1	PRDX1	45976708	rs61784830	1	46229073	G	A	0.910714	-0.00468436	0.0110028	0.670297	-0.770652	0.155692	7.427602e-07	0.00607844	0.01433	0.671437	0.0629672	17	cis	No
ENSG00000132763	1	MMACHC	45965725	rs7526665	1	46005832	G	T	0.568511	-0.0202456	0.00648231	0.00178889	-0.602445	0.092555	7.562718e-11	0.0336057	0.0119345	0.00486506	0.422	20	cis	No
ENSG00000132781	1	MUTYH	45794835	rs2492841	1	45894891	G	T	0.483193	0.0216295	0.00640878	0.000738205	-0.465659	0.0558881	7.949151e-17	-0.0464492	0.014849	0.00175941	0.803956	20	cis	No
ENSG00000070759	1	TESK2	45809555	rs3219463	1	45806432	C	T	0.750117	0.0195367	0.00724041	0.00696979	0.546204	0.110272	7.298294e-07	0.0357681	0.0150951	0.0178114	0.404418	12	cis	No
ENSG00000117472	1	TSPAN1	46640745	rs55999016	1	46825261	C	T	0.703431	-0.0051026	0.00809142	0.52829	0.412882	0.0991269	3.110988e-05	-0.0123585	0.0198208	0.532948	0.601472	13	cis	No
ENSG00000232022	1	ENSG00000232022	46897801	rs61784641	1	46882334	T	C	0.369981	-0.0114827	0.00655377	0.0797604	-0.388191	0.0556326	2.999169e-12	0.02958	0.0174069	0.0892581	0.351952	20	cis	No
ENSG00000116667	1	C1orf21	184356192	rs16823149	1	184402508	A	G	0.860761	-0.00627605	0.00947856	0.507887	-0.696454	0.0793412	1.66471e-18	0.00901144	0.0136484	0.50909	0.81804	20	cis	No
ENSG00000271387	1	ENSG00000271387	184354887	rs6692317	1	184335001	T	C	0.27556	0.0100846	0.00735818	0.170524	-0.494728	0.09367	1.280579e-07	-0.0203841	0.0153658	0.184643	0.960622	20	cis	No
ENSG00000132185	1	FCRLA	161676762	rs1538971	1	161676394	T	C	0.335668	0.00349259	0.00695382	0.615489	-0.436894	0.0573352	2.536712e-14	-0.00799414	0.015951	0.616253	0.535964	20	cis	No
ENSG00000158887	1	MPZ	161274525	rs7551761	1	161278562	C	G	0.686741	0.00519919	0.00793472	0.51231	0.271253	0.0604087	7.112411e-06	0.0191673	0.0295619	0.51674	NA	NA	cis	No
ENSG00000118217	1	ATF6	161736084	rs12048680	1	161912723	G	A	0.890756	0.00289343	0.00877819	0.74169	0.405772	0.0747998	5.802774e-08	0.00713068	0.0216732	0.742149	0.744876	12	cis	No
ENSG00000196878	1	LAMB3	209788215	rs2236890	1	209794258	G	A	0.975957	0.013651	0.0127484	0.284258	0.812722	0.187501	1.46101e-05	0.0167966	0.0161576	0.29855	0.700506	4	cis	No
ENSG00000116574	1	RHOU	228870824	rs12078883	1	228875567	C	T	0.714869	0.00245848	0.00704872	0.727252	-0.313728	0.0631144	6.668389e-07	-0.00783634	0.0225229	0.727894	0.88906	19	cis	No
ENSG00000175147	1	TMEM51-AS1	15442448	rs1476356	1	15443368	A	G	0.0704949	0.006574	0.0143777	0.647502	-1.11264	0.113836	1.455191e-22	-0.00590847	0.0129363	0.64786	0.124562	19	cis	No
ENSG00000132196	1	HSD17B7	162760492	rs74116796	1	162776741	A	G	0.98261	0.0161791	0.0278067	0.560674	0.876304	0.175912	6.309712e-07	0.0184629	0.0319475	0.563323	NA	NA	cis	No
ENSG00000116977	1	LGALS8	236681300	rs2799412	1	236704754	C	T	0.269491	0.0188345	0.00698673	0.00702291	-0.882321	0.0550146	6.940974e-58	-0.0213465	0.00802966	0.00784986	0.0923092	20	cis	No
ENSG00000119285	1	HEATR1	236712305	rs509767	1	236733473	T	C	0.251491	0.0199449	0.00736475	0.00676592	-0.494527	0.106861	3.69677e-06	-0.0403313	0.0172551	0.0194212	0.493611	20	cis	No
ENSG00000273058	1	ENSG00000273058	236699473	rs12088366	1	236810254	C	A	0.929423	-0.0198207	0.0137431	0.149238	-0.515838	0.129174	6.514746e-05	0.0384243	0.0283266	0.174948	NA	NA	cis	No
ENSG00000134242	1	PTPN22	114356433	rs1217385	1	114418205	A	C	0.411531	0.000116202	0.00683498	0.986436	-0.665653	0.0503963	7.84999e-40	-0.000174568	0.0102681	0.986436	0.165789	20	cis	No
ENSG00000085465	1	OVGP1	111956936	rs1264890	1	111968487	G	A	0.594888	-0.00917214	0.00673325	0.17313	-0.59541	0.0652862	7.51271e-20	0.0154047	0.011434	0.177893	0.318445	20	cis	No
ENSG00000260948	1	ENSG00000260948	111973668	rs1264890	1	111968487	G	A	0.594888	-0.00917214	0.00673325	0.17313	-0.572542	0.0514336	8.797054e-29	0.01602	0.011848	0.176334	0.228449	20	cis	No
ENSG00000154370	1	TRIM11	228581374	rs75958642	1	228892996	C	A	0.99006	-0.00107745	0.0237864	0.963871	-0.870057	0.234628	0.000208705	0.00123837	0.0273409	0.963873	NA	NA	cis	No
ENSG00000134690	1	CDCA8	38158090	rs12140187	1	37427852	A	C	0.982843	-0.0235302	0.0364431	0.518495	1.12305	0.284223	7.772698e-05	-0.0209521	0.0328805	0.523983	NA	NA	cis	No
ENSG00000009307	1	CSDE1	115259534	rs2207702	1	115309478	T	G	0.68289	0.00544409	0.00774094	0.481878	0.35264	0.102456	0.000577706	0.0154381	0.022405	0.490793	0.516168	3	cis	No
ENSG00000097096	1	SYDE2	85622556	rs17413395	1	86455163	G	C	0.69958	-0.00537436	0.00774958	0.487993	-0.437841	0.103293	2.24688e-05	0.0122747	0.0179349	0.49372	NA	NA	cis	No
ENSG00000123685	1	BATF3	212859760	rs28549276	1	212872553	T	C	0.34944	-0.0198949	0.00682306	0.00354746	-0.31846	0.0760221	2.801343e-05	0.0624722	0.0261045	0.0167038	0.947939	12	cis	No
ENSG00000203705	1	TATDN3	212965170	rs61736926	1	212965284	C	G	0.835201	-0.0260559	0.00898087	0.00371665	-0.659121	0.0788794	6.484795e-17	0.0395313	0.0144235	0.00612964	0.520548	20	cis	No
ENSG00000079335	1	CDC14A	100810584	rs17420882	1	100818728	T	G	0.721639	0.0164296	0.0070188	0.0192425	-0.593898	0.0585468	3.524261e-24	-0.027664	0.0121288	0.0225567	0.419031	20	cis	No
ENSG00000099260	1	PALMD	100111499	rs1981192	1	100143603	G	T	0.38457	0.00752011	0.00662386	0.256247	0.350583	0.0717975	1.045151e-06	0.0214503	0.0193978	0.268809	0.709623	15	cis	No
ENSG00000117643	1	MAN1C1	25943959	rs12043011	1	26106769	C	A	0.870682	-0.0151454	0.00948175	0.110193	-0.35218	0.0869441	5.107626e-05	0.0430047	0.0289407	0.13729	0.541577	3	cis	No
ENSG00000132881	1	CPLANE2	16558195	rs6693819	1	16556623	C	T	0.293301	0.00470506	0.00750566	0.530746	-0.748625	0.0539041	7.479208e-44	-0.00628494	0.0100361	0.531164	0.000358985	20	cis	No
ENSG00000162461	1	SLC25A34	16062900	rs6672142	1	16056740	C	A	0.77451	-0.0269423	0.0146633	0.0661517	-0.464598	0.0840594	3.257167e-08	0.0579906	0.0332596	0.0812333	0.356337	12	cis	No
ENSG00000169231	1	THBS3	155165379	rs6676150	1	155123837	G	C	0.605742	0.00260327	0.00713633	0.715267	-0.572132	0.0525288	1.261578e-27	-0.00455012	0.0124802	0.71542	0.164894	20	cis	No
ENSG00000232093	1	ENSG00000232093	155017667	rs11264301	1	155020836	C	T	0.656746	-0.00588432	0.00744894	0.429554	-0.507096	0.054796	2.157289e-20	0.011604	0.0147428	0.431228	0.984287	20	cis	No
ENSG00000235919	1	ASH1L-AS1	155531821	rs6662748	1	154700649	C	T	0.306256	0.0116741	0.00742448	0.115863	0.31871	0.0799461	6.703793e-05	0.0366292	0.0250419	0.143545	NA	NA	cis	No
ENSG00000125703	1	ATG4C	63249806	rs7535496	1	63348556	A	T	0.42542	0.00606134	0.00658098	0.357029	0.642075	0.0871387	1.726517e-13	0.00944024	0.0103293	0.360755	0.0937132	20	cis	No
ENSG00000132849	1	PATJ	62208149	rs6670989	1	62556237	T	G	0.738796	0.0236956	0.00843126	0.00494722	-0.370418	0.0672574	3.640363e-08	-0.0639699	0.0255538	0.0123026	0.1432	20	cis	No
ENSG00000272405	1	ENSG00000272405	156611458	rs4661210	1	156634639	A	G	0.587535	0.0171076	0.00696372	0.0140227	0.500133	0.0547936	7.005023e-20	0.0342061	0.0144192	0.01768	0.361449	20	cis	No
ENSG00000143498	1	TAF1A	222731244	rs4846766	1	222742676	T	C	0.401027	-0.00714794	0.0069311	0.302407	0.435678	0.0548166	1.8967e-15	-0.0164065	0.0160421	0.306444	0.0496645	20	cis	No
ENSG00000118193	1	KIF14	200520628	rs138964723	1	200779073	G	A	0.976541	-0.025075	0.0240631	0.297387	0.858601	0.241437	0.000376248	-0.0292045	0.0292044	0.317308	NA	NA	cis	No
ENSG00000234678	1	ENSG00000234678	201969222	rs7523510	1	201948676	C	T	0.345121	0.00529063	0.00680813	0.437097	-0.470586	0.103158	5.071626e-06	-0.0112426	0.0146758	0.443635	0.988224	7	cis	No
ENSG00000184677	1	ZBTB40	22778344	rs1011380	1	22806281	G	A	0.38317	0.00524042	0.00722462	0.468234	-0.398023	0.0563244	1.5875e-12	-0.0131661	0.0182466	0.470562	0.123606	13	cis	No
ENSG00000081026	1	MAGI3	113933371	rs773566	1	113821584	T	C	0.579599	0.000124967	0.00676348	0.985259	-0.406491	0.096206	2.387117e-05	-0.000307429	0.0166389	0.985259	0.687677	4	cis	No
ENSG00000137962	1	ARHGAP29	94614544	rs2151849	1	94535174	A	G	0.773459	-0.000906298	0.00742507	0.902852	0.578082	0.072784	1.982589e-15	-0.00156777	0.0128458	0.902864	0.262529	15	cis	No
ENSG00000188295	1	ZNF669	247263264	rs10802468	1	247263032	C	T	0.601657	-0.00324706	0.0069463	0.640177	0.66386	0.05083	5.543296e-39	-0.00489118	0.0104702	0.640391	0.152372	20	cis	No
ENSG00000196418	1	ZNF124	247285277	rs6700824	1	247287601	G	A	0.716853	-0.00973032	0.00742232	0.189873	-0.935372	0.0485649	1.157903e-82	0.0104026	0.00795351	0.190898	0.482871	20	cis	No
ENSG00000227671	1	ENSG00000227671	247353153	rs10924952	1	247352823	G	A	0.562092	0.00948563	0.00643928	0.140727	-0.752463	0.0612351	1.049554e-34	-0.0126061	0.00861888	0.143572	0.0713334	20	cis	No
ENSG00000235021	1	ENSG00000235021	246853349	rs3007303	1	246857840	T	A	0.653595	0.000681112	0.00688961	0.921249	0.613862	0.0529919	4.96262e-31	0.00110955	0.0112238	0.921252	0.0551737	20	cis	No
ENSG00000260698	1	ENSG00000260698	246845410	rs9426209	1	246840434	C	T	0.476307	0.00322947	0.0064884	0.618675	-0.287817	0.0543249	1.17034e-07	-0.0112206	0.0226428	0.620213	0.78279	11	cis	No
ENSG00000162711	1	NLRP3	247579458	rs61857831	1	247898103	A	T	0.975724	0.0206594	0.0262929	0.432021	0.912914	0.240891	0.000150803	0.0226302	0.0294136	0.441669	0.50573	4	cis	No
ENSG00000162722	1	TRIM58	248020501	rs10749636	1	248020448	G	A	0.244865	-0.000129911	0.00759198	0.986348	0.489589	0.060261	4.492851e-16	-0.000265347	0.0155069	0.986348	0.399858	20	cis	No
ENSG00000238243	1	OR2W3	248031277	rs140377937	1	248025191	C	T	0.834617	0.0161408	0.0100945	0.109828	-0.599868	0.0960141	4.165245e-10	-0.0269073	0.0173702	0.121371	0.100071	20	cis	No
ENSG00000117834	1	SLC5A9	48688357	rs11205458	1	48695658	C	G	0.33345	0.00642443	0.00692381	0.353472	0.483237	0.054329	5.860674e-19	0.0132946	0.0144057	0.356077	0.337644	20	cis	No
ENSG00000134222	1	PSRC1	109822178	rs12023150	1	109825591	C	T	0.723039	-0.00378478	0.00739881	0.608973	-0.479181	0.0596691	9.696243e-16	0.00789844	0.0154718	0.609698	0.199251	11	cis	No
ENSG00000223776	1	LGALS8-AS1	236686369	rs679458	1	236743176	C	T	0.872666	-0.020555	0.0112361	0.067345	-0.3928	0.091987	1.953261e-05	0.0523294	0.0311196	0.0926547	NA	NA	cis	No
ENSG00000126107	1	HECTD3	45468212	rs7525733	1	45463500	T	G	0.75105	0.016466	0.00727141	0.0235442	0.668477	0.0991873	1.588853e-11	0.0246321	0.0114752	0.0318286	0.578435	20	cis	No
ENSG00000142949	1	PTPRF	43990858	rs7513994	1	44225051	A	G	0.212652	-0.00967497	0.00780759	0.215281	-0.486677	0.110376	1.037171e-05	0.0198797	0.0166642	0.232885	0.276449	18	cis	No
ENSG00000196517	1	SLC6A9	44457172	rs12037805	1	44497249	T	C	0.671802	0.0150872	0.00719876	0.0360998	-0.404735	0.0610688	3.413607e-11	-0.0372767	0.0186545	0.0456872	0.0154761	20	cis	No
ENSG00000198520	1	ARMH1	45140364	rs6678831	1	45137703	G	A	0.622899	-0.00358391	0.00753638	0.634397	0.473954	0.0558344	2.091935e-17	-0.00756173	0.015926	0.634927	0.48918	20	cis	No
ENSG00000203710	1	CR1	207669492	rs11118993	1	206715851	A	G	0.466203	0.00495355	0.00659281	0.452439	-0.278701	0.072232	0.000114124	-0.0177737	0.0240998	0.460816	0.657753	3	cis	No
ENSG00000142627	1	EPHA2	16450832	rs4661359	1	16513153	C	T	0.37605	0.0136537	0.00706787	0.0533844	0.280345	0.0716565	9.140311e-05	0.0487032	0.0281172	0.0832472	0.0806318	11	cis	No
ENSG00000272426	1	ENSG00000272426	17230834	rs10907231	1	16851440	C	T	0.635271	0.0130702	0.00813078	0.107946	-0.268099	0.0608921	1.068369e-05	-0.0487514	0.0322857	0.131043	0.0779484	11	cis	No
ENSG00000069248	1	NUP133	229577045	rs12129135	1	229695687	T	A	0.796569	-0.0256239	0.00820821	0.00179786	-0.607497	0.0674106	2.025271e-19	0.0421795	0.0142992	0.00318006	0.58343	20	cis	No
ENSG00000023572	1	GLRX2	193065598	rs7546869	1	193146311	T	A	0.340103	0.00879932	0.00674536	0.192063	0.369032	0.0582027	2.290761e-10	0.0238443	0.0186614	0.201342	0.329745	18	cis	No
ENSG00000132768	1	DPH2	44435672	rs7556565	1	44416090	C	T	0.20098	-0.00246464	0.00743494	0.740271	-0.484764	0.115109	2.538529e-05	0.00508421	0.0153847	0.741043	0.229765	12	cis	No
ENSG00000198198	1	SZT2	43855553	rs1762343	1	43858937	T	A	0.342437	-0.0177164	0.00672372	0.00841581	-0.409605	0.0742234	3.418225e-08	0.0432524	0.0181903	0.0174173	0.0712457	9	cis	No
ENSG00000143252	1	SDHC	161284047	rs16832908	1	161347435	G	T	0.951292	0.00178175	0.0106776	0.867473	-1.18786	0.12011	4.611263e-23	-0.00149997	0.00899022	0.867493	0.87465	10	cis	No
ENSG00000158793	1	NIT1	161087876	rs11265555	1	161098128	C	T	0.628268	0.0104661	0.00657812	0.1116	-0.773209	0.0528596	1.873121e-48	-0.0135359	0.00855774	0.113714	0.423294	20	cis	No
ENSG00000116701	1	NCF2	183524698	rs4987079	1	183560196	C	T	0.9169	-0.0183462	0.0120703	0.128524	-0.70211	0.136762	2.839417e-07	0.0261301	0.0179291	0.145003	0.00971961	6	cis	No
ENSG00000162704	1	ARPC5	183592401	rs2767316	1	183582249	A	G	0.546919	-0.0355725	0.00676345	1.44426e-07	0.85461	0.0459454	3.178765e-77	-0.0416242	0.00822437	4.168806e-07	0.811467	20	cis	No
ENSG00000117586	1	TNFSF4	173152873	rs114855879	1	173035456	T	C	0.981909	-0.033357	0.0279578	0.232822	-1.42719	0.364813	9.14935e-05	0.0233725	0.0204802	0.253776	NA	NA	cis	No
ENSG00000243709	1	LEFTY1	226073982	rs360060	1	226078337	A	G	0.324346	-0.00509444	0.00675756	0.450917	-0.796017	0.0500114	4.852971e-57	0.00639991	0.00849873	0.451424	0.437392	20	cis	No
ENSG00000116729	1	WLS	68564142	rs2033344	1	68660398	A	G	0.749066	-0.00337124	0.00744222	0.650557	0.687122	0.0623366	2.968021e-28	-0.00490632	0.0108401	0.650832	0.242734	19	cis	No
ENSG00000232284	1	GNG12-AS1	68297986	rs57748040	1	68660893	G	A	0.749183	-0.00346062	0.00744677	0.642136	0.757506	0.060612	7.691112e-36	-0.00456844	0.00983744	0.642366	0.270525	20	cis	No
ENSG00000234383	1	ENSG00000234383	68627444	rs2033344	1	68660398	A	G	0.749066	-0.00337124	0.00744222	0.650557	0.714371	0.103823	5.957562e-12	-0.00471917	0.0104404	0.651262	0.524738	17	cis	No
ENSG00000143199	1	ADCY10	167778625	rs744168	1	168094079	G	T	0.773693	-0.0116976	0.00810321	0.148857	-0.358676	0.0740617	1.279371e-06	0.0326133	0.0235743	0.166535	0.161686	9	cis	No
ENSG00000172339	1	ALG14	95439963	rs1887094	1	95418702	C	G	0.545285	-0.000174967	0.00657256	0.978762	0.384921	0.0912837	2.478429e-05	-0.000454553	0.0170754	0.978763	0.0657709	19	cis	No
ENSG00000143314	1	MRPL24	156707095	rs61516873	1	156686724	G	A	0.282306	-0.00828264	0.010922	0.448244	0.414817	0.0601945	5.529353e-12	-0.019967	0.0264886	0.450973	0.183569	11	cis	No
ENSG00000272145	1	ENSG00000272145	41156052	rs12040422	1	41134911	G	A	0.214986	-0.0188605	0.00736084	0.0103989	-0.401838	0.0803724	5.741916e-07	0.0469356	0.0205834	0.0225918	0.727293	14	cis	No
ENSG00000066136	1	NFYC	41157320	rs12027614	1	41143186	C	T	0.383698	-0.0124431	0.00986802	0.207325	0.306094	0.0568311	7.202977e-08	-0.0406512	0.0331102	0.219539	0.901984	10	cis	No
ENSG00000117016	1	RIMS3	41086351	rs7368217	1	41100527	C	T	0.751634	-0.00839415	0.00772805	0.277394	-0.879151	0.0911414	5.110621e-22	0.00954802	0.00884591	0.280422	0.0533464	20	cis	No
ENSG00000137960	1	GIPC2	78445226	rs605659	1	78597844	A	G	0.778128	0.0118795	0.00753972	0.115121	0.46375	0.0640012	4.294076e-13	0.0256162	0.0166381	0.123655	0.873718	20	cis	No
ENSG00000027869	1	SH2D2A	156776035	rs7517728	1	156793132	G	C	0.300187	0.0248753	0.00727944	0.000632707	0.304069	0.0732943	3.34512e-05	0.0818081	0.0310159	0.00834901	0.893048	8	cis	No
ENSG00000232586	1	KIAA1614-AS1	180918835	rs76014269	1	180923595	G	A	0.864496	-0.0107283	0.00963747	0.26563	0.404032	0.0825436	9.842033e-07	-0.0265531	0.0244623	0.277714	0.586085	4	cis	No
ENSG00000116199	1	FAM20B	178994939	rs67498652	1	178995500	G	T	0.618581	-0.0176208	0.00672859	0.00882412	0.474137	0.0561945	3.244139e-17	-0.0371639	0.0148591	0.012381	0.227448	20	cis	No
ENSG00000162779	1	AXDND1	179334855	rs4652391	1	179431386	A	G	0.672152	-0.0108927	0.00722767	0.13179	0.865239	0.0452021	1.138222e-81	-0.0125892	0.00837923	0.132985	0.487839	20	cis	No
ENSG00000186283	1	TOR3A	179050512	rs9659206	1	179055261	C	A	0.686158	-0.0118555	0.00703069	0.0917473	-0.721383	0.0525665	7.368728e-43	0.0164344	0.00981943	0.094197	0.587818	20	cis	No
ENSG00000117528	1	ABCD3	94883933	rs681187	1	94941376	G	A	0.218721	-0.0100331	0.00733151	0.171159	-0.654772	0.0822114	1.658996e-15	0.015323	0.0113611	0.177425	0.0417278	18	cis	No
ENSG00000142856	1	ITGB3BP	63906441	rs67831341	1	63964166	A	T	0.688959	0.0103748	0.00725671	0.152809	1.18422	0.040477	3.698685e-188	0.00876087	0.00613515	0.153298	0.810251	20	cis	No
ENSG00000082482	1	KCNK2	215179118	rs79835717	1	216092480	A	T	0.970121	-0.0281855	0.0175112	0.107491	-0.973814	0.230289	2.350878e-05	0.0289434	0.0192407	0.132509	0.768334	7	cis	No
ENSG00000197982	1	C1orf122	38272651	rs12130112	1	38207042	G	A	0.796569	-0.00481612	0.00846775	0.569519	0.28325	0.0732566	0.000110388	-0.0170031	0.0302167	0.573636	0.314119	3	cis	No
ENSG00000174514	1	MFSD4A	205538013	rs17419308	1	205533181	G	A	0.962185	-0.0105927	0.019843	0.593463	-1.41562	0.147944	1.08347e-21	0.00748273	0.014039	0.594036	0.839787	6	cis	No
ENSG00000242252	1	BGLAP	156211753	rs759328	1	156231266	G	C	0.776611	-0.00138511	0.00756754	0.854772	-0.518687	0.0791239	5.550139e-11	0.00267042	0.0145955	0.854828	0.319479	8	cis	No
ENSG00000142687	1	KIAA0319L	35899091	rs10796889	1	35479291	T	G	0.0672269	-0.0167386	0.0110966	0.131439	0.366362	0.10622	0.000562478	-0.0456887	0.0330586	0.166956	NA	NA	cis	No
ENSG00000197056	1	ZMYM1	35525387	rs11806451	1	35601040	A	G	0.0984095	0.00504073	0.0124162	0.684757	-0.531933	0.069167	1.46492e-14	-0.00947625	0.0233742	0.685172	0.0733615	20	cis	No
ENSG00000239636	1	ENSG00000239636	36035414	rs12563326	1	36046144	G	A	0.982493	-0.0199012	0.011946	0.0957277	-0.695047	0.144928	1.620118e-06	0.0286329	0.0181948	0.11556	0.0396477	20	cis	No
ENSG00000241014	1	GPR199P	35439957	rs1985122	1	35503957	G	A	0.966808	-0.00638304	0.0110873	0.564813	0.41654	0.0940532	9.477218e-06	-0.015324	0.0268416	0.568065	0.225289	7	cis	No
ENSG00000122432	1	SPATA1	84971974	rs3813607	1	84970107	A	G	0.81641	0.00234781	0.00831452	0.777656	-0.846429	0.0664591	3.726433e-37	-0.00277378	0.00982547	0.777709	0.763002	20	cis	No
ENSG00000203668	1	CHML	241792155	rs3765820	1	241794056	C	A	0.415266	0.0185484	0.00669105	0.00556914	0.285796	0.0722406	7.616103e-05	0.0649008	0.0285875	0.0231922	0.0633901	6	cis	No
ENSG00000117152	1	RGS4	163038565	rs55990964	1	162155532	A	G	0.980626	-0.0106344	0.0325533	0.743914	0.875326	0.227127	0.000116246	-0.0121491	0.0373233	0.744796	NA	NA	cis	No
ENSG00000086619	1	ERO1B	236378855	rs2812473	1	236428895	A	G	0.722572	-0.000517522	0.00725427	0.943127	0.504247	0.073913	8.967541e-12	-0.00102633	0.0143871	0.94313	0.141806	20	cis	No
ENSG00000198756	1	COLGALT2	183898796	rs10797924	1	183937280	A	G	0.4169	0.0102593	0.00709678	0.148282	0.468069	0.0541698	5.583301e-18	0.0219184	0.0153726	0.153923	0.0706815	19	cis	No
ENSG00000143621	1	ILF2	153634512	rs10797096	1	153640665	G	A	0.544234	0.00726149	0.00652088	0.265462	0.304098	0.0573142	1.121788e-07	0.0238788	0.0219105	0.275788	0.909753	12	cis	No
ENSG00000189334	1	S100A14	153586731	rs9726753	1	153591652	G	A	0.519608	0.00753132	0.00657428	0.251972	-0.465132	0.0553555	4.365808e-17	-0.0161918	0.014265	0.256345	0.334555	20	cis	No
ENSG00000153898	1	MCOLN2	85391268	rs7516610	1	85459198	G	A	0.52416	0.000785262	0.00644182	0.902978	-1.02271	0.0365231	1.547127e-172	-0.000767825	0.00629883	0.902979	0.796804	20	cis	No
ENSG00000077157	1	PPP1R12B	202317827	rs788805	1	202293916	T	C	0.451564	0.0104704	0.00662841	0.114193	-0.395045	0.0564509	2.595959e-12	-0.0265043	0.017201	0.123351	0.293659	20	cis	No
ENSG00000117153	1	KLHL12	202860228	rs73089386	1	202869582	A	G	0.764239	-0.00426182	0.00726893	0.557669	-0.744584	0.0642165	4.374091e-31	0.00572376	0.00977488	0.558172	0.344871	20	cis	No
ENSG00000226862	1	ENSG00000226862	202573396	rs705757	1	202260924	C	G	0.47444	-0.00187712	0.006494	0.77254	0.316953	0.057527	3.595707e-08	-0.00592239	0.020517	0.772844	0.0734908	20	cis	No
ENSG00000000460	1	C1orf112	169631245	rs12410352	1	169794688	T	C	0.67612	0.00768942	0.00740448	0.299046	-0.503142	0.0590685	1.624203e-17	-0.0152828	0.0148254	0.302611	0.756718	20	cis	No
ENSG00000171806	1	METTL18	169761670	rs78136146	1	169782113	A	G	0.904762	-0.012643	0.0119165	0.288706	-1.50618	0.0785892	7.225302e-82	0.00839408	0.00792385	0.289443	0.951527	14	cis	No
ENSG00000174175	1	SELP	169558087	rs17590231	1	169650719	C	T	0.668301	-0.00525909	0.00720969	0.465728	-0.369578	0.0603864	9.344544e-10	0.01423	0.019646	0.468869	0.546307	14	cis	No
ENSG00000171735	1	CAMTA1	6845384	rs277664	1	6815758	A	G	0.465453	-0.0108342	0.00686111	0.11432	0.31882	0.0558759	1.157611e-08	-0.0339822	0.0223292	0.128042	0.0830722	17	cis	No
ENSG00000188404	1	SELL	169659808	rs1885555	1	168851940	A	G	0.766923	-0.0130602	0.00721068	0.0701053	0.257403	0.0674385	0.000135163	-0.0507383	0.0310072	0.101769	0.164481	3	cis	No
ENSG00000162444	1	RBP7	10057264	rs35232720	1	10051165	C	T	0.946078	-0.0143273	0.0171361	0.403104	-1.14712	0.128994	5.956979e-19	0.0124898	0.0150042	0.405173	0.365932	20	cis	No
ENSG00000060656	1	PTPRU	29563028	rs6687475	1	29596084	G	C	0.256419	0.0212862	0.00760822	0.00514543	-0.397827	0.0634701	3.658464e-10	-0.0535062	0.0209432	0.010624	0.504435	14	cis	No
ENSG00000159023	1	EPB41	29213603	rs150083	1	29250470	A	T	0.894024	-0.0229063	0.00884289	0.0095875	-1.40608	0.125891	5.780535e-29	0.0162909	0.00645596	0.011623	0.238873	20	cis	No
ENSG00000180098	1	TRNAU1AP	28879597	rs79535515	1	28570314	G	A	0.972222	0.0629629	0.0207348	0.00239278	0.665146	0.188144	0.000407311	0.0946603	0.041094	0.0212503	NA	NA	cis	No
ENSG00000152061	1	RABGAP1L	174128548	rs1801791	1	174961987	C	T	0.299953	0.000916066	0.00692622	0.894778	0.621005	0.0601047	5.04724e-25	0.00147513	0.0111542	0.894787	0.116415	20	cis	No
ENSG00000235750	1	KIAA0040	175126123	rs3766684	1	175156464	C	T	0.419701	-0.0137999	0.00646104	0.0326903	-0.643858	0.0841081	1.931283e-14	0.0214331	0.0104182	0.0396586	0.484509	20	cis	No
ENSG00000001460	1	STPG1	24683489	rs2235556	1	24767426	C	T	0.756069	-0.00292612	0.00709647	0.680094	-0.657519	0.102389	1.346993e-10	0.00445024	0.010815	0.680715	0.793864	20	cis	No
ENSG00000001461	1	NIPAL3	24742284	rs577168	1	24725076	G	A	0.632003	0.00324876	0.00676793	0.631212	-0.419988	0.0567617	1.37063e-13	-0.00773536	0.0161485	0.631927	0.900252	20	cis	No
ENSG00000184454	1	NCMAP	24882602	rs6656087	1	24882890	A	G	0.78303	0.00219495	0.00789136	0.7809	0.84592	0.0992416	1.543445e-17	0.00259475	0.0093337	0.781014	0.438884	20	cis	No
ENSG00000235052	1	ENSG00000235052	23875630	rs74623943	1	23461959	G	C	0.986811	0.0682057	0.0178422	0.000131993	1.18861	0.307733	0.000112245	0.0573827	0.0211198	0.00658734	NA	NA	cis	No
ENSG00000121481	1	RNF2	185014496	rs234124	1	184929349	T	C	0.827148	0.00390662	0.00788758	0.620398	0.383939	0.0736187	1.835853e-07	0.0101751	0.0206363	0.621964	0.286206	10	cis	No
ENSG00000010803	1	SCMH1	41492872	rs36040148	1	41801448	T	C	0.771125	0.0110749	0.00738924	0.133928	-0.501483	0.0858681	5.215204e-09	-0.0220843	0.0152123	0.146573	0.858775	20	cis	No
ENSG00000171790	1	SLFNL1	41481269	rs61781795	1	41554913	C	A	0.764706	-0.00919348	0.00736653	0.212029	-0.493202	0.108384	5.352231e-06	0.0186404	0.0154877	0.228759	0.362094	13	cis	No
ENSG00000235358	1	ENSG00000235358	41708045	rs34813691	1	41700332	G	A	0.887838	0.00164295	0.00921653	0.858518	1.31929	0.0768245	4.245723e-66	0.00124533	0.00698635	0.858525	0.802704	20	cis	No
ENSG00000233621	1	LINC01137	37920480	rs75785507	1	37939999	G	A	0.655462	-0.0167848	0.00692676	0.0153853	-0.797576	0.0502295	8.907174e-57	0.0210448	0.00878531	0.0166	0.665203	20	cis	No
ENSG00000143207	1	COP1	175913967	rs61821055	1	176148383	G	A	0.923903	0.0045528	0.0137872	0.741235	0.67861	0.112736	1.750257e-09	0.00670901	0.0203474	0.741609	0.441982	16	cis	No
ENSG00000066027	1	PPP2R5A	212458879	rs10863957	1	212418044	T	C	0.78338	0.00920675	0.00730938	0.207821	0.428578	0.0692953	6.217842e-10	0.0214821	0.0174051	0.217112	0.921286	20	cis	No
ENSG00000162769	1	FLVCR1	213031597	rs4951457	1	212879500	A	C	0.672502	0.00642489	0.00688121	0.350466	0.33474	0.0631213	1.1384e-07	0.0191937	0.0208731	0.357812	0.114755	20	cis	No
ENSG00000163875	1	MEAF6	37958176	rs7544462	1	37962756	A	C	0.922736	-0.0343158	0.0137433	0.0125278	-1.05482	0.0989207	1.511493e-26	0.0325324	0.0133815	0.015051	0.0273553	20	cis	No
ENSG00000179023	1	KLHDC7A	18807424	rs2992761	1	18804674	G	A	0.380486	0.00432538	0.00716882	0.546269	0.91806	0.0455833	3.27683e-90	0.00471143	0.00781216	0.546449	0.900575	20	cis	No
ENSG00000162517	1	PEF1	32095463	rs10798879	1	32096815	T	C	0.36613	0.00376584	0.00672793	0.575662	0.477561	0.0541112	1.089223e-18	0.00788557	0.0141164	0.576428	0.820755	20	cis	No
ENSG00000010072	1	SPRTN	231472850	rs2491402	1	231494338	T	C	0.347572	-0.0177318	0.00665193	0.00768358	-0.402804	0.0557076	4.805527e-13	0.0440209	0.0176005	0.0123804	0.422297	19	cis	No
ENSG00000116906	1	GNPAT	231376953	rs12745333	1	231394888	G	T	0.448179	0.00536275	0.00643234	0.404441	-0.505972	0.0676326	7.365377e-14	-0.0105989	0.0127915	0.407338	0.106289	20	cis	No
ENSG00000173409	1	ARV1	231114727	rs11122177	1	231118857	C	T	0.669351	-0.00671646	0.00666869	0.313856	-0.678841	0.0513106	5.885581e-40	0.00989401	0.00985207	0.315254	0.184895	20	cis	No
ENSG00000134256	1	CD101	117544382	rs12130298	1	117544331	A	C	0.927288	-0.00760987	0.0148365	0.60801	-0.932996	0.108599	8.603746e-18	0.00815638	0.0159303	0.608648	0.314051	18	cis	No
ENSG00000163393	1	SLC22A15	116519119	rs6697290	1	116534457	A	G	0.764356	0.00132958	0.00709701	0.851391	0.681306	0.0620623	4.888373e-28	0.00195152	0.0104183	0.851413	0.789366	20	cis	No
ENSG00000225079	1	FTH1P22	117317726	rs78156601	1	118129838	C	T	0.939542	0.0115621	0.016272	0.477364	-0.595316	0.179225	0.000894977	-0.0194218	0.0279518	0.487161	NA	NA	cis	No
ENSG00000143367	1	TUFT1	151512781	rs868138	1	151532372	C	T	0.593604	0.00769626	0.0072707	0.289814	-0.402214	0.0562536	8.677343e-13	-0.0191347	0.0182737	0.295045	0.0067386	7	cis	No
ENSG00000143375	1	CGN	151482986	rs56078223	1	151898843	T	G	0.722339	-0.0122848	0.00697086	0.078018	0.278267	0.0790069	0.000428211	-0.0441475	0.0280119	0.11502	NA	NA	cis	No
ENSG00000143442	1	POGZ	151375200	rs2769265	1	151344150	C	A	0.823646	-0.00405484	0.00788351	0.607011	0.475498	0.0871966	4.947957e-08	-0.00852756	0.0166531	0.608601	0.0504778	10	cis	No
ENSG00000134184	1	GSTM1	110230436	rs145858840	1	110253215	G	T	0.923203	0.0135208	0.0144418	0.349159	0.974488	0.0984905	4.409545e-23	0.0138748	0.0148861	0.351304	0.922196	18	cis	No
ENSG00000134202	1	GSTM3	110276554	rs4970777	1	110283785	C	T	0.428455	-0.0015461	0.00680885	0.820368	1.12425	0.0369501	2.478383e-203	-0.00137523	0.00605652	0.820373	0.716885	20	cis	No
ENSG00000134243	1	SORT1	109852192	rs3879448	1	109891423	G	C	0.287115	-0.00399252	0.00802517	0.618837	0.464064	0.0946299	9.390965e-07	-0.00860338	0.017382	0.620629	0.834138	20	cis	No
ENSG00000162650	1	ATXN7L2	110026101	rs569670	1	110022896	A	C	0.762372	0.00228226	0.00861567	0.791089	-0.3659	0.0808215	5.975281e-06	-0.00623739	0.0235868	0.791438	0.906166	12	cis	No
ENSG00000213366	1	GSTM2	110210644	rs620077	1	110218716	C	T	0.0795985	0.0187504	0.013529	0.165764	-0.592687	0.0881725	1.793629e-11	-0.0316363	0.0233067	0.174657	0.499575	11	cis	No
ENSG00000121933	1	TMIGD3	112025970	rs2789539	1	112032347	G	A	0.379318	-0.0100152	0.00659706	0.128981	-0.690957	0.0498108	9.410229e-44	0.0144947	0.00960472	0.131268	0.795347	20	cis	No
ENSG00000198162	1	MAN1A2	117910071	rs7553018	1	118039722	C	T	0.696779	-0.00281653	0.00688408	0.682439	0.46151	0.0585942	3.370231e-15	-0.00610286	0.0149365	0.682844	0.489232	20	cis	No
ENSG00000117640	1	MTFR1L	26145131	rs3767876	1	26152081	T	G	0.483894	0.0085091	0.0066859	0.203127	0.998638	0.0380809	1.41023e-151	0.00852071	0.0067029	0.203658	0.0207304	20	cis	No
ENSG00000162430	1	SELENON	26126667	rs11247764	1	26155550	G	C	0.49253	0.00695295	0.00671367	0.30037	0.407066	0.0861914	2.326031e-06	0.0170806	0.0168847	0.311727	0.0918539	11	cis	No
ENSG00000228172	1	ENSG00000228172	26143240	rs213623	1	26202724	C	G	0.473739	0.0109039	0.00651285	0.0940879	0.620206	0.0499112	1.883942e-35	0.0175811	0.010596	0.0970712	0.0572257	20	cis	No
ENSG00000179163	1	FUCA1	24171567	rs7537224	1	24220691	G	A	0.19106	-0.0125949	0.0113348	0.266494	0.891178	0.0922493	4.435067e-22	-0.0141329	0.0128028	0.26964	0.287432	20	cis	No
ENSG00000174606	1	ANGEL2	213165524	rs3010790	1	213201248	G	A	0.691849	0.0202901	0.00999615	0.0423781	0.82412	0.0489208	1.122546e-63	0.0246203	0.0122172	0.0438821	0.98612	15	cis	No
ENSG00000077549	1	CAPZB	19665267	rs7549219	1	19837272	G	A	0.228291	-0.00685898	0.00734067	0.350108	-0.308386	0.0777118	7.237796e-05	0.0222415	0.0244545	0.363082	0.787054	3	cis	No
ENSG00000173436	1	MICOS10	19923477	rs1569634	1	19935449	G	C	0.786881	0.000898153	0.00801652	0.910794	0.396697	0.061092	8.390046e-11	0.00226408	0.0202112	0.910807	0.460502	13	cis	No
ENSG00000163563	1	MNDA	158801107	rs11265079	1	158793852	G	T	0.786881	-0.00787672	0.00822662	0.338331	-0.398114	0.0661392	1.751329e-09	0.0197851	0.0209238	0.344363	0.511082	16	cis	No
ENSG00000168159	1	RNF187	228674762	rs12076802	1	228672258	C	T	0.951914	-0.0129941	0.0157219	0.408523	-0.66024	0.106026	4.749023e-10	0.0196809	0.0240212	0.412608	0.249465	8	cis	No
ENSG00000127603	1	MACF1	39546988	rs260975	1	39564890	C	T	0.651727	-0.00359602	0.00683005	0.598541	-0.650611	0.0911438	9.449679e-13	0.00552714	0.0105264	0.599532	0.190176	20	cis	No
ENSG00000135845	1	PIGC	172339329	rs2285171	1	172424748	C	A	0.780229	-0.00332827	0.00745708	0.655363	-0.566711	0.0659426	8.398614e-18	0.00587296	0.0131763	0.655798	0.151893	20	cis	No
ENSG00000127463	1	EMC1	19542158	rs12095615	1	19573223	A	G	0.631186	-0.00301481	0.00681679	0.658299	-0.712255	0.0523146	3.267986e-42	0.00423277	0.00957576	0.658468	0.319194	20	cis	No
ENSG00000116685	1	KIAA2013	11979648	rs760188	1	11995409	A	G	0.490313	0.0106625	0.00661219	0.106841	0.426374	0.0899489	2.1353e-06	0.0250074	0.0163807	0.126852	0.768138	20	cis	No
ENSG00000171488	1	LRRC8C	90098631	rs7517627	1	90161356	G	A	0.336951	0.0130583	0.00670646	0.0515207	-0.382047	0.0598352	1.714119e-10	-0.0341798	0.0183521	0.0625401	0.160953	20	cis	No
ENSG00000225492	1	GBP1P1	89873238	rs4517333	1	89873134	T	C	0.115663	0.0157447	0.0094815	0.0967992	0.742199	0.0890366	7.691861e-17	0.0212136	0.0130259	0.103404	0.364511	15	cis	No
ENSG00000090686	1	USP48	22004791	rs35745827	1	22109796	C	T	0.904762	0.00721135	0.0126457	0.5685	-0.626277	0.0873814	7.656667e-13	-0.0115146	0.0202557	0.56972	0.726198	20	cis	No
ENSG00000160803	1	UBQLN4	156005092	rs6669212	1	156110313	G	A	0.831816	0.00179436	0.010154	0.859733	-0.554886	0.139479	6.941978e-05	-0.00323375	0.0183173	0.859869	NA	NA	cis	No
ENSG00000183856	1	IQGAP3	156495197	rs151195790	1	157537366	T	G	0.985177	0.0135733	0.0309429	0.66091	0.993884	0.296657	0.000807288	0.0136568	0.031399	0.663603	NA	NA	cis	No
ENSG00000198715	1	GLMP	156259880	rs933489	1	156235120	T	C	0.500817	-0.00360915	0.00636737	0.570837	-0.513131	0.0520888	6.781413e-23	0.00703358	0.0124294	0.571473	0.256178	20	cis	No
ENSG00000273002	1	ARHGEF2-AS2	155948590	rs74404550	1	155948438	C	G	0.924253	-0.0113279	0.0137683	0.410649	0.54892	0.10959	5.475413e-07	-0.0206367	0.0254187	0.416865	0.17745	7	cis	No
ENSG00000097033	1	SH3GLB1	87170259	rs142972392	1	87591663	C	T	0.987979	0.0167954	0.0403463	0.677205	-0.883806	0.241188	0.000247934	-0.0190035	0.0459443	0.679152	NA	NA	cis	No
ENSG00000173641	1	HSPB7	16340523	rs1048302	1	16340879	T	G	0.326214	0.0129791	0.00771448	0.0924848	0.446679	0.0742292	1.770578e-09	0.0290569	0.0179331	0.105169	0.345233	20	cis	No
ENSG00000219481	1	NBPF1	16888814	rs11586910	1	17276357	T	C	0.827614	0.0218585	0.00937383	0.0197081	0.385787	0.0714195	6.601137e-08	0.0566595	0.0264653	0.0322824	0.0731956	20	cis	No
ENSG00000142733	1	MAP3K6	27681675	rs17162492	1	27540993	G	A	0.846055	-0.0149207	0.00974416	0.12571	-0.523807	0.0793462	4.069013e-11	0.0284851	0.0190964	0.135792	0.840947	20	cis	No
ENSG00000134201	1	GSTM5	110254864	rs4970772	1	110250168	G	A	0.660948	-0.00343204	0.00716166	0.63178	-0.698738	0.0564948	3.885092e-35	0.00491177	0.0102571	0.632035	0.949577	20	cis	No
ENSG00000168765	1	GSTM4	110198703	rs3754450	1	110197132	T	C	0.609711	0.00439725	0.00705914	0.533339	-0.722251	0.0496074	5.094897e-48	-0.00608826	0.00978275	0.533714	0.732396	20	cis	No
ENSG00000181754	1	AMIGO1	110046797	rs6684193	1	110055209	T	C	0.544732	0.00866629	0.00787871	0.271348	0.899673	0.0431369	1.338694e-96	0.00963271	0.00876948	0.272014	0.985247	12	cis	No
ENSG00000160685	1	ZBTB7B	154975127	rs1218598	1	154795389	G	A	0.217787	-0.00835686	0.00860541	0.33149	-0.414129	0.112586	0.000234762	0.0201794	0.0214915	0.347759	0.727588	4	cis	No
ENSG00000153936	1	HS2ST1	87380331	rs61800759	1	87406146	A	G	0.878735	0.000350694	0.0111433	0.974894	-0.819022	0.0862146	2.102915e-21	-0.000428186	0.0136057	0.974894	0.754527	20	cis	No
ENSG00000085832	1	EPS15	51819935	rs151129349	1	51999831	G	A	0.949304	0.0441585	0.0168307	0.00869851	1.07154	0.121992	1.581517e-18	0.0412103	0.0163927	0.0119392	0.348112	12	cis	No
ENSG00000083444	1	PLOD1	11994262	rs2273286	1	12012409	A	G	0.937675	0.00804488	0.0117588	0.493876	0.652375	0.117862	3.110932e-08	0.0123317	0.0181618	0.497144	0.0519254	20	cis	No
ENSG00000198793	1	MTOR	11166592	rs2744820	1	11365015	G	A	0.693394	-0.0155248	0.00771277	0.0441281	0.300321	0.0679475	9.874886e-06	-0.051694	0.0282196	0.0669736	0.136341	13	cis	No
ENSG00000116857	1	TMEM9	201103900	rs1106729	1	201123799	G	C	0.614729	-0.0113344	0.00672797	0.0920536	0.874608	0.04887	1.25253e-71	-0.0129594	0.00772656	0.0934928	0.457385	20	cis	No
ENSG00000159176	1	CSRP1	201452658	rs12092548	1	201421705	T	C	0.30077	-0.00736165	0.00717749	0.305053	0.385996	0.108483	0.000373529	-0.0190718	0.0193519	0.324364	NA	NA	cis	No
ENSG00000272195	1	ENSG00000272195	245132652	rs2291426	1	245134114	A	C	0.401844	-0.001645	0.00673052	0.806914	0.704468	0.0494818	5.405617e-46	-0.0023351	0.00955545	0.806942	0.358738	20	cis	No
ENSG00000117395	1	EBNA1BP2	43629846	rs1782382	1	43635875	A	G	0.733543	-0.000755071	0.00833017	0.927776	0.587806	0.0630923	1.201281e-20	-0.00128456	0.0141723	0.92778	0.526468	20	cis	No
ENSG00000186973	1	FAM183A	43610824	rs11210789	1	43576444	G	A	0.918651	-0.00770583	0.00966288	0.42518	0.890356	0.0824571	3.524983e-27	-0.00865477	0.0108824	0.426438	0.704766	20	cis	No
ENSG00000069812	1	HES2	6472478	rs114162822	1	6226940	G	A	0.970938	0.0320527	0.023368	0.170173	-0.83405	0.189473	1.07287e-05	-0.0384302	0.0293462	0.190349	0.435428	4	cis	No
ENSG00000162413	1	KLHL21	6650784	rs12041318	1	6632951	T	C	0.8757	0.0276711	0.00991171	0.0052423	-0.490013	0.106617	4.306969e-06	-0.0564701	0.0236668	0.0170303	0.0930423	18	cis	No
ENSG00000041988	1	THAP3	6684926	rs10523	1	6695244	A	G	0.314426	0.00816917	0.00683438	0.231968	-0.570612	0.0551163	4.061481e-25	-0.0143165	0.0120568	0.235063	0.0106851	20	cis	No
ENSG00000123473	1	STIL	47715811	rs3122620	1	47803319	G	A	0.506769	0.000117731	0.00642717	0.985385	-0.461378	0.0510354	1.561684e-19	-0.000255173	0.0139304	0.985385	0.382976	20	cis	No
ENSG00000162366	1	PDZK1IP1	47649265	rs12184246	1	47657141	C	A	0.310341	0.00283989	0.00721533	0.693883	0.411164	0.0998939	3.85492e-05	0.00690695	0.0176286	0.695203	0.849981	7	cis	No
ENSG00000261729	1	GS1-204I12.4	185624134	rs234643	1	184832268	C	T	0.48261	-0.00594579	0.0064002	0.352889	0.348058	0.0964555	0.000307993	-0.0170828	0.0189879	0.368299	0.687183	4	cis	No
ENSG00000134255	1	CEPT1	111682249	rs1774781	1	111588341	A	G	0.236228	0.00679262	0.00739232	0.358161	-0.539947	0.111352	1.240812e-06	-0.0125802	0.0139345	0.366627	0.354051	18	cis	No
ENSG00000070831	1	CDC42	22379120	rs2473290	1	22358457	T	C	0.230976	0.0296896	0.00727713	4.50654e-05	-0.35702	0.0674861	1.221353e-07	-0.0831595	0.0257403	0.00123482	0.978143	17	cis	No
ENSG00000169641	1	LUZP1	23410516	rs654585	1	23514714	T	C	0.556606	0.00019416	0.00643682	0.975936	-0.316324	0.055971	1.58987e-08	-0.000613801	0.0203491	0.975937	0.00946694	20	cis	No
ENSG00000269925	1	ENSG00000269925	7836443	rs11121022	1	7836659	A	C	0.566176	-0.00303052	0.00658832	0.645528	-0.470306	0.0548231	9.602387e-18	0.00644372	0.0140287	0.646002	0.40587	20	cis	No
ENSG00000182118	1	FAM89A	231154704	rs4847025	1	231040206	G	A	0.333002	0.00703684	0.00998198	0.480838	0.691741	0.088847	6.929893e-15	0.0101727	0.0144893	0.482628	0.525299	19	cis	No
ENSG00000162433	1	AK4	65613232	rs6660166	1	65616650	T	C	0.759454	-0.000562278	0.00714793	0.937301	-0.514671	0.0582174	9.528326e-19	0.0010925	0.0138889	0.937303	0.972234	20	cis	No
ENSG00000226891	1	LINC01359	65437908	rs17127207	1	65465019	T	C	0.904879	-0.00569825	0.0119117	0.632382	-0.633171	0.168618	0.000173297	0.00899954	0.0189648	0.635116	0.414371	13	cis	No
ENSG00000006555	1	TTC22	55245385	rs651688	1	55260925	T	C	0.771825	0.00692145	0.00750267	0.356251	-0.322097	0.0727941	9.654726e-06	-0.0214887	0.0237941	0.366467	0.205854	6	cis	No
ENSG00000153363	1	LINC00467	211556145	rs111798493	1	211596868	A	G	0.964402	-0.000713236	0.0208538	0.972716	-0.896236	0.144354	5.34571e-10	0.000795813	0.0232686	0.972717	0.187748	15	cis	No
ENSG00000075945	1	KIFAP3	169890467	rs76411981	1	170115664	T	A	0.958917	-0.0316414	0.0190052	0.0959365	0.932804	0.144389	1.044629e-10	-0.0339207	0.02104	0.106917	0.740679	14	cis	No
ENSG00000143811	1	PYCR2	226107578	rs12405730	1	226042596	T	G	0.93394	0.0311972	0.0150769	0.0385262	0.905673	0.111525	4.630825e-16	0.0344464	0.0171791	0.0449483	0.142717	14	cis	No
ENSG00000143815	1	LBR	225589204	rs6702433	1	225603103	C	T	0.164099	0.00505189	0.00956007	0.597197	0.276455	0.0706764	9.170249e-05	0.0182738	0.0348951	0.600502	0.641231	3	cis	No
ENSG00000242267	1	ENSG00000242267	48561764	rs41289162	1	48866555	A	G	0.914513	0.000907483	0.0126977	0.943025	-0.509042	0.12223	3.118508e-05	-0.00178273	0.024948	0.943033	0.896878	5	cis	No
ENSG00000116678	1	LEPR	65886248	rs3934256	1	65904455	C	G	0.5838	0.00744858	0.0073499	0.310857	-0.360736	0.0560905	1.26499e-10	-0.0206483	0.0206261	0.316791	0.45788	20	cis	No
ENSG00000213625	1	LEPROT	65886270	rs75465244	1	65894940	A	G	0.90768	-0.00766682	0.0127984	0.549142	-0.640379	0.0914927	2.573677e-12	0.0119723	0.0200587	0.550599	0.438334	11	cis	No
ENSG00000143382	1	ADAMTSL4	150521884	rs4970996	1	150506589	G	C	0.250467	-2.74221e-07	0.00757208	0.999971	0.407312	0.0780268	1.787757e-07	-6.73246e-07	0.0185904	0.999971	0.952992	20	cis	No
ENSG00000143452	1	HORMAD1	150670536	rs1134067	1	150721175	G	T	0.605275	-0.00284134	0.00657109	0.665451	0.634346	0.0515294	7.965224e-35	-0.00447916	0.0103652	0.665644	0.0577867	20	cis	No
ENSG00000163125	1	RPRD2	150335567	rs1260389	1	150372109	T	A	0.60866	-0.0114642	0.00668956	0.0865755	-0.43218	0.0564266	1.871626e-14	0.0265264	0.0158614	0.094447	0.123422	20	cis	No
ENSG00000163131	1	CTSS	150702672	rs2864869	1	150734655	G	A	0.639472	-0.00336277	0.00664478	0.612803	0.729904	0.0504199	1.705328e-47	-0.00460714	0.0091092	0.61302	0.225456	20	cis	No
ENSG00000117475	1	BLZF1	169337208	rs7539415	1	169339612	C	T	0.402661	0.0132519	0.00693178	0.0559065	-0.460425	0.0560069	2.020479e-16	-0.0287819	0.0154569	0.0625928	0.506376	20	cis	No
ENSG00000117477	1	CCDC181	169364108	rs11800843	1	169339031	G	A	0.885854	0.0160751	0.00994043	0.105848	-0.656272	0.107231	9.349025e-10	-0.0244946	0.0156667	0.117939	0.185597	20	cis	No
ENSG00000127125	1	PPCS	42921788	rs11807949	1	42102877	C	T	0.878618	0.0184019	0.00847795	0.0299646	0.461284	0.146183	0.00160215	0.0398928	0.0223073	0.0737228	NA	NA	cis	No
ENSG00000164010	1	ERMAP	43282795	rs11581978	1	43302515	A	T	0.820612	-0.00552127	0.00970159	0.569282	-0.996202	0.0909505	6.411547e-28	0.00554232	0.00975171	0.569802	0.606584	20	cis	No
ENSG00000186409	1	CCDC30	42929001	rs12077356	1	43115408	A	C	0.855042	0.00712026	0.00855066	0.405006	-0.715037	0.13259	6.935144e-08	-0.00995789	0.0121001	0.41053	0.359537	20	cis	No
ENSG00000116752	1	BCAS2	115110178	rs761755	1	115222434	G	A	0.142857	-0.0153014	0.0083331	0.0663249	-0.435221	0.0849906	3.042222e-07	0.0351578	0.0203406	0.0839064	0.559094	15	cis	No
ENSG00000117143	1	UAP1	162531323	rs4657209	1	162568625	G	A	0.442927	-0.00503769	0.00657742	0.443732	0.495115	0.095373	2.087686e-07	-0.0101748	0.0134284	0.448628	0.64198	7	cis	No
ENSG00000143740	1	SNAP47	227916240	rs6664307	1	227918562	C	T	0.765523	0.00469597	0.00803099	0.558729	-0.354725	0.0663313	8.904183e-08	-0.0132383	0.022775	0.561061	0.731335	14	cis	No
ENSG00000224093	1	ENSG00000224093	94057756	rs6677770	1	94066635	T	C	0.802754	0.00534471	0.00937318	0.568533	-0.453258	0.0714586	2.25418e-10	-0.0117918	0.020763	0.570087	0.191423	20	cis	No
ENSG00000186056	1	MATN1-AS1	31191351	rs1882026	1	31203488	C	T	0.714869	-0.0121814	0.00747338	0.103107	-0.367123	0.0647432	1.424237e-08	0.0331807	0.0211809	0.117223	0.192799	9	cis	No
ENSG00000131697	1	NPHP4	5922871	rs1295100	1	6059229	T	G	0.656863	0.00450344	0.00681691	0.508851	0.899676	0.0803273	4.071186e-29	0.00500562	0.00759024	0.509587	0.680652	20	cis	No
ENSG00000117410	1	ATP6V0B	44440159	rs12129124	1	43679291	G	C	0.924603	-0.0142906	0.010132	0.158409	0.617446	0.152346	5.05844e-05	-0.0231447	0.0173748	0.182833	0.866875	7	cis	No
ENSG00000159214	1	CCDC24	44457031	rs79401056	1	44460632	G	C	0.94993	-0.0157253	0.0189568	0.406803	1.25286	0.12693	5.590837e-23	-0.0125515	0.0151842	0.408453	0.390861	11	cis	No
ENSG00000126091	1	ST3GAL3	44171495	rs653953	1	44083015	G	A	0.322829	-0.0101812	0.00678508	0.133479	-0.47407	0.0988572	1.622689e-06	0.0214762	0.0149967	0.152127	0.806058	20	cis	No
ENSG00000236200	1	ENSG00000236200	44165436	rs3815268	1	44163886	G	T	0.587302	-0.00627794	0.00648309	0.332867	-0.615715	0.0875857	2.067443e-12	0.0101962	0.0106288	0.337409	0.286267	20	cis	No
ENSG00000143761	1	ARF1	228270361	rs79246456	1	229072968	C	T	0.94176	-0.0541005	0.0176224	0.00214071	-0.739499	0.200813	0.000230939	0.0731583	0.031025	0.0183715	NA	NA	cis	No
ENSG00000049245	1	VAMP3	7831329	rs1048785	1	7841330	G	A	0.867414	-0.00940046	0.0107798	0.383182	0.973596	0.102371	1.898496e-21	-0.0096554	0.0111186	0.385175	0.573812	20	cis	No
ENSG00000116288	1	PARK7	8014351	rs379920	1	8028865	G	C	0.417017	-0.0144796	0.00653317	0.026669	0.647508	0.0544204	1.20837e-32	-0.022362	0.0102633	0.0293433	0.416611	20	cis	No
ENSG00000117597	1	UTP25	210001352	rs12731696	1	209999051	G	T	0.477137	-0.00369694	0.00651938	0.570667	-0.595998	0.0520721	2.473016e-30	0.00620294	0.010952	0.571139	0.294438	14	cis	No
ENSG00000162757	1	C1orf74	209955661	rs6675890	1	210022893	G	C	0.264472	-0.00172075	0.00754924	0.819695	0.536073	0.108988	8.713894e-07	-0.00320992	0.0140976	0.819885	0.612611	9	cis	No
ENSG00000070785	1	EIF2B3	45316450	rs80232536	1	45381694	T	C	0.930322	0.0181162	0.0104341	0.0825198	0.386115	0.098567	8.955227e-05	0.0469192	0.0295587	0.11244	0.645993	8	cis	No
ENSG00000142937	1	RPS8	45240923	rs16832210	1	45209661	A	G	0.857843	0.00599728	0.0106371	0.572885	-0.994098	0.0827836	3.209984e-33	-0.00603289	0.010712	0.573307	0.0383108	20	cis	No
ENSG00000142945	1	KIF2C	45205490	rs6677990	1	44351122	G	A	0.916433	-0.00431061	0.0139891	0.757976	0.703868	0.167525	2.650782e-05	-0.00612417	0.019928	0.758603	0.800647	10	cis	No
ENSG00000222009	1	BTBD19	45274154	rs4520451	1	45270733	G	T	0.832983	0.0109827	0.00828679	0.185063	-0.461108	0.0759143	1.247172e-09	-0.0238181	0.0183943	0.195368	0.147478	20	cis	No
ENSG00000137996	1	RTCA	100731763	rs12089688	1	100760164	C	T	0.144374	-0.00700752	0.0100457	0.48545	-0.445658	0.0711538	3.768954e-10	0.015724	0.0226806	0.488135	0.228708	20	cis	No
ENSG00000224616	1	ENSG00000224616	100729565	rs7552568	1	100720764	C	T	0.157796	-0.00227901	0.00955952	0.811569	0.710711	0.126728	2.044661e-08	-0.00320666	0.0134628	0.811736	0.356813	14	cis	No
ENSG00000174574	1	AKIRIN1	39456895	rs34848020	1	39453785	G	A	0.578198	0.0016572	0.00675139	0.8061	-0.42455	0.053971	3.653806e-15	-0.00390343	0.0159102	0.806192	0.0722826	20	cis	No
ENSG00000143570	1	SLC39A1	153931575	rs12403956	1	153943079	A	G	0.708683	-0.00363032	0.0069554	0.60171	0.367839	0.0609934	1.63152e-09	-0.00986932	0.0189795	0.603064	0.496675	20	cis	No
ENSG00000143578	1	CREB3L4	153940010	rs60633748	1	154121510	T	C	0.606326	-0.000901108	0.00653256	0.890287	0.32864	0.0742172	9.507378e-06	-0.00274193	0.0198872	0.89034	0.655687	14	cis	No
ENSG00000143612	1	C1orf43	154179182	rs60633748	1	154121510	T	C	0.606326	-0.000901108	0.00653256	0.890287	0.432706	0.0562089	1.380159e-14	-0.00208249	0.0150994	0.890305	0.86134	20	cis	No
ENSG00000272030	1	ENSG00000272030	153603914	rs28510471	1	153609886	C	G	0.460668	0.00685537	0.0064942	0.291145	-0.778726	0.0507863	4.574217e-53	-0.00880331	0.00835926	0.292285	0.357256	20	cis	No
ENSG00000236915	1	ENSG00000236915	87036864	rs61802920	1	87169118	T	C	0.893674	0.0142784	0.012626	0.258107	1.31017	0.121808	5.553278e-27	0.0108981	0.00969003	0.260727	0.500486	18	cis	No
ENSG00000118473	1	SGIP1	66999066	rs12144047	1	67010510	T	G	0.797502	0.0151607	0.00811355	0.0616838	0.487828	0.0829763	4.124418e-09	0.031078	0.0174518	0.0749476	0.66077	20	cis	No
ENSG00000152760	1	DYNLT5	67218142	rs512691	1	67197944	G	A	0.271359	0.013136	0.00712974	0.0654134	-0.683412	0.0557111	1.360912e-34	-0.0192212	0.0105496	0.0684568	0.786848	20	cis	No
ENSG00000225171	1	DUTP6	166837985	rs742006	1	166824176	C	G	0.62465	-0.00278114	0.00660842	0.673866	0.701245	0.0504864	7.305602e-44	-0.003966	0.00942816	0.674007	0.523883	20	cis	No
ENSG00000143476	1	DTL	212208919	rs6540752	1	212878285	A	G	0.526727	-0.00904584	0.00662448	0.17209	0.387018	0.0866734	7.997794e-06	-0.0233732	0.0178992	0.191613	0.903811	12	cis	No
ENSG00000143493	1	INTS7	212113741	rs79414368	1	212791310	G	T	0.960317	0.0163109	0.0203858	0.423647	-0.965817	0.247675	9.637922e-05	-0.0168882	0.021547	0.433168	NA	NA	cis	No
ENSG00000132854	1	KANK4	62702651	rs1886830	1	62760352	C	A	0.420285	0.00175999	0.0066437	0.791078	-0.431582	0.0549205	3.893791e-15	-0.004078	0.0154026	0.791194	0.0586101	20	cis	No
ENSG00000240563	1	L1TD1	62660503	rs12739067	1	61815710	G	A	0.83275	-0.00611354	0.00962803	0.525446	0.446537	0.0990468	6.533613e-06	-0.013691	0.0217744	0.529501	0.0384128	4	cis	No
ENSG00000117519	1	CNN3	95362507	rs2766003	1	95426365	A	G	0.568627	0.0204738	0.00655589	0.00179043	-0.381173	0.0555412	6.748332e-12	-0.0537126	0.0188963	0.00447614	0.247955	20	cis	No
ENSG00000152078	1	TLCD4	95582894	rs2797616	1	95429915	C	T	0.477241	0.0162087	0.00681743	0.0174289	0.555282	0.0876283	2.345994e-10	0.02919	0.0131131	0.0260132	0.0466584	20	cis	No
ENSG00000143093	1	STRIP1	110574199	rs34762282	1	110576662	G	A	0.548319	-0.00366296	0.00685937	0.593336	-0.386799	0.0554397	3.016948e-12	0.00946993	0.0177855	0.594414	0.129922	13	cis	No
ENSG00000143341	1	HMCN1	185703683	rs10911819	1	186069140	C	T	0.519258	-0.00648965	0.00648676	0.317094	-0.349361	0.0875111	6.546549e-05	0.0185758	0.0191416	0.331829	0.57713	9	cis	No
ENSG00000261349	1	ENSG00000261349	25592593	rs72660908	1	25583610	C	G	0.603291	-0.00754086	0.00828913	0.362965	-1.03179	0.0393306	1.094202e-151	0.00730852	0.00803857	0.363254	0.171945	20	cis	No
ENSG00000158195	1	WASF2	27730730	rs116673229	1	28112092	T	A	0.957983	0.0132336	0.0201403	0.511137	0.629415	0.166188	0.00015225	0.0210252	0.0324764	0.517373	NA	NA	cis	No
ENSG00000198492	1	YTHDF2	29063133	rs528265	1	29107895	T	C	0.396242	-0.0117105	0.0071983	0.103769	-0.462069	0.053594	6.599167e-18	0.0253436	0.0158533	0.109902	0.770284	20	cis	No
ENSG00000163382	1	NAXE	156561554	rs879461	1	156567496	C	T	0.261204	-0.0134924	0.00700599	0.0541254	0.592523	0.058906	8.402242e-24	-0.0227711	0.0120388	0.05856	0.0341993	20	cis	No
ENSG00000185946	1	RNPC3	104068313	rs6693052	1	104032256	A	C	0.893557	-0.0134056	0.0109778	0.222029	0.39479	0.083631	2.35127e-06	-0.0339563	0.028722	0.237111	0.324501	10	cis	No
ENSG00000079739	1	PGM1	64058947	rs61765315	1	64128309	T	A	0.813609	-0.000500342	0.00827727	0.951799	-0.633486	0.111124	1.193043e-08	0.000789823	0.013067	0.951802	0.120436	19	cis	No
ENSG00000169991	1	IFFO2	19230775	rs28399295	1	19338362	G	A	0.880252	-0.0330321	0.0116659	0.00463306	0.686611	0.164176	2.887338e-05	-0.0481089	0.0205184	0.0190439	0.038883	7	cis	No
ENSG00000230896	1	ENSG00000230896	46160356	rs3014237	1	46090252	A	G	0.2919	-0.012857	0.00704929	0.0681707	0.375042	0.101677	0.000225513	-0.0342815	0.0209682	0.102065	0.79159	7	cis	No
ENSG00000163050	1	COQ8A	227085237	rs2297419	1	227182754	G	A	0.778478	-0.00287482	0.00800066	0.719354	-0.350234	0.0895387	9.170998e-05	0.00820828	0.0229399	0.720481	0.213375	9	cis	No
ENSG00000142657	1	PGD	10458649	rs3762288	1	10463572	T	C	0.524043	0.000312193	0.00646912	0.96151	0.356937	0.0563559	2.394713e-10	0.000874645	0.0181245	0.961511	0.531727	20	cis	No
ENSG00000171603	1	CLSTN1	9789084	rs12728592	1	10854073	C	A	0.979809	-0.0605542	0.0236988	0.0106138	-1.36566	0.304232	7.160208e-06	0.0443406	0.0199678	0.0263775	NA	NA	cis	No
ENSG00000178028	1	DMAP1	44679127	rs28713190	1	44631338	A	G	0.667951	-0.00336308	0.00691809	0.626876	0.344922	0.0721487	1.746761e-06	-0.00975026	0.0201604	0.628645	0.274642	20	cis	No
ENSG00000158161	1	EYA3	28296855	rs76890118	1	28417903	G	A	0.944795	-0.033288	0.0178093	0.0616033	0.779763	0.132788	4.299977e-09	-0.0426899	0.0239685	0.0748984	0.356632	19	cis	No
ENSG00000238231	1	ENSG00000238231	28316669	rs9426299	1	29005059	G	A	0.909897	-0.00785486	0.0131328	0.549768	0.700845	0.173573	5.396726e-05	-0.0112077	0.018943	0.554082	0.0840911	5	cis	No
ENSG00000143774	1	GUK1	228327663	rs59115652	1	228034374	A	G	0.969071	-0.0116124	0.0173333	0.502891	0.524603	0.133357	8.360402e-05	-0.0221356	0.0335165	0.508973	NA	NA	cis	No
ENSG00000181873	1	IBA57	228353516	rs10916277	1	228386374	C	T	0.640289	0.00442163	0.00675932	0.513013	0.529253	0.0563283	5.675255e-21	0.00835447	0.0128023	0.514031	0.86338	20	cis	No
ENSG00000143155	1	TIPRL	168148171	rs7339877	1	168171487	A	G	0.648459	-0.00102062	0.00681658	0.88098	0.844612	0.0869723	2.699465e-22	-0.00120839	0.00807162	0.880995	0.0703559	20	cis	No
ENSG00000143167	1	GPA33	167022073	rs12040885	1	167057553	G	A	0.54225	-0.0297613	0.00672597	9.65184e-06	-0.696622	0.0513634	6.672029e-42	0.0427223	0.010156	2.592226e-05	0.0786906	20	cis	No
ENSG00000215840	1	ENSG00000215840	161375858	rs112748785	1	161350392	T	G	0.939076	0.00279889	0.0106444	0.792593	0.962217	0.202459	2.00771e-06	0.00290879	0.0110793	0.792903	0.451182	8	cis	No
ENSG00000233008	1	LOC101927560	84041459	rs12139383	1	84323516	A	G	0.972689	-0.00215476	0.0222813	0.922959	-0.879613	0.187179	2.610343e-06	0.00244967	0.0253362	0.922975	0.574686	7	cis	No
ENSG00000117569	1	PTBP2	97187221	rs2391710	1	96306787	A	G	0.255602	-0.00203966	0.00711247	0.774286	0.350549	0.0800956	1.205259e-05	-0.00581847	0.020333	0.774756	0.410166	5	cis	No
ENSG00000163220	1	S100A9	153330330	rs60752752	1	153339782	A	G	0.881186	0.00745672	0.0103804	0.472543	0.43011	0.10729	6.100966e-05	0.0173368	0.0245187	0.479514	0.973579	7	cis	No
ENSG00000143799	1	PARP1	226548392	rs76887998	1	226539353	T	C	0.851891	-0.00299083	0.00809783	0.711877	-0.886112	0.126814	2.79832e-12	0.00337523	0.00915137	0.71226	0.45863	20	cis	No
ENSG00000163041	1	H3-3A	226249552	rs6678547	1	226258009	C	T	0.741246	-0.00535412	0.00713188	0.452815	1.09771	0.0600354	1.101908e-74	-0.00487754	0.00650253	0.453195	0.0714208	20	cis	No
ENSG00000075151	1	EIF4G3	21132963	rs9426732	1	21462778	C	G	0.538049	-0.000380031	0.00667316	0.954586	-0.356744	0.070632	4.400958e-07	0.00106528	0.0187069	0.954589	0.360691	20	cis	No
ENSG00000117298	1	ECE1	21543740	rs11799887	1	21553180	C	T	0.591387	0.000739699	0.00663379	0.911216	-0.305966	0.0714369	1.843683e-05	-0.00241759	0.0216888	0.911246	0.147477	5	cis	No
ENSG00000134748	1	PRPF38A	52870236	rs7552960	1	52888836	T	A	0.95098	-0.00689815	0.0159867	0.666111	0.849723	0.0840906	5.257627e-24	-0.00811812	0.0188312	0.666396	0.720501	20	cis	No
ENSG00000266993	1	LOC105378721	52259637	rs4422953	1	52310882	C	T	0.459967	0.00162193	0.00727059	0.823472	0.32332	0.0711083	5.445038e-06	0.00501649	0.0225143	0.823681	0.695119	13	cis	No
ENSG00000081985	1	IL12RB2	67773047	rs7535550	1	67801960	G	A	0.398576	-0.0119932	0.00661592	0.0698647	-0.39794	0.0973016	4.318269e-05	0.0301382	0.0181854	0.0974643	0.984448	7	cis	No
ENSG00000240710	1	ENSG00000240710	204572163	rs6679960	1	204104804	A	T	0.893207	-0.000112604	0.0110968	0.991904	0.514716	0.147366	0.000478045	-0.000218769	0.0215592	0.991904	NA	NA	cis	No
ENSG00000185420	1	SMYD3	245912642	rs7366357	1	246837602	T	C	0.589286	0.00510256	0.00678912	0.452304	0.345432	0.0572676	1.620476e-09	0.0147715	0.019806	0.455781	0.106626	20	cis	No
ENSG00000227953	1	ENSG00000227953	246939315	rs78107539	1	246926187	C	T	0.950047	0.0170768	0.0174343	0.327335	-1.06516	0.133015	1.167474e-15	-0.0160321	0.0164898	0.330927	0.186691	20	cis	No
ENSG00000118729	1	CASQ2	116242628	rs4472754	1	116272788	C	G	0.635037	0.0130547	0.00675848	0.053408	0.428129	0.0738666	6.792616e-09	0.0304924	0.0166397	0.0668745	0.986357	20	cis	No
ENSG00000173218	1	VANGL1	116184574	rs10801914	1	116217036	G	A	0.310924	0.0200388	0.00702426	0.00433356	-0.599714	0.057301	1.237343e-25	-0.0334139	0.01214	0.00591635	0.605338	20	cis	No
ENSG00000094963	1	FMO2	171154347	rs2235193	1	171108836	C	T	0.759454	0.00362027	0.00716162	0.613201	0.324165	0.0643751	4.764352e-07	0.011168	0.0222036	0.614977	0.749768	18	cis	No
ENSG00000162909	1	CAPN2	223889295	rs11588475	1	223912906	C	T	0.950397	-0.00621666	0.0118099	0.598613	-1.07763	0.199685	6.790041e-08	0.00576883	0.0110112	0.600343	0.0359478	9	cis	No
ENSG00000203697	1	CAPN8	223711349	rs61823558	1	223721408	C	T	0.46557	0.00423105	0.00673831	0.530063	0.396464	0.0553113	7.617388e-13	0.010672	0.0170611	0.531634	0.0949494	18	cis	No
ENSG00000121903	1	ZSCAN20	33938246	rs7534512	1	34874711	T	G	0.540266	-0.0240174	0.0068399	0.000445809	0.37396	0.09156	4.420642e-05	-0.0642245	0.0241207	0.00775312	0.312773	5	cis	No
ENSG00000120370	1	GORAB	170501270	rs72707653	1	170383504	G	A	0.89662	0.030843	0.0108129	0.00433879	-0.804759	0.0852645	3.785712e-21	-0.0383258	0.0140364	0.00632463	0.09221	17	cis	No
ENSG00000134375	1	TIMM17A	201924619	rs7513	1	201938995	C	T	0.535364	0.0122205	0.00646761	0.0588268	0.670976	0.0630684	1.965013e-26	0.018213	0.00978995	0.0628319	0.620879	20	cis	No
ENSG00000198700	1	IPO9	201798269	rs79606698	1	201808183	G	T	0.931723	-0.00403647	0.010162	0.691212	-0.636765	0.0992359	1.39277e-10	0.00633903	0.0159893	0.691771	0.268957	9	cis	No
ENSG00000117322	1	CR2	207627575	rs7530746	1	206712543	A	G	0.5	0.00317477	0.00658685	0.629816	-0.260421	0.0571476	5.189137e-06	-0.0121909	0.0254342	0.631716	0.761192	5	cis	No
ENSG00000174059	1	CD34	208057594	rs3860294	1	207889329	C	T	0.707283	9.45056e-05	0.00839236	0.991015	0.283966	0.0848575	0.000818727	0.000332806	0.0295543	0.991015	NA	NA	cis	No
ENSG00000188761	1	BCL2L15	114420790	rs6665194	1	114417843	G	A	0.588469	-0.000416085	0.00683349	0.951448	0.619496	0.0883049	2.292587e-12	-0.000671651	0.0110311	0.951449	0.380263	20	cis	No
ENSG00000143553	1	SNAPIN	153631130	rs9660679	1	153582258	T	C	0.479692	0.00492388	0.00667574	0.46077	0.356586	0.0731257	1.080718e-06	0.0138084	0.0189342	0.465829	0.491574	11	cis	No
ENSG00000143575	1	HAX1	154244987	rs1760801	1	154259650	G	A	0.672962	0.00627701	0.0103792	0.545335	0.446681	0.0765826	5.454819e-09	0.0140526	0.0233608	0.547478	0.971943	4	cis	No
ENSG00000143614	1	GATAD2B	153777201	rs6667928	1	154114705	C	T	0.6655	0.00199434	0.00668883	0.765581	0.26148	0.0608131	1.710039e-05	0.00762712	0.0256421	0.766126	0.111479	8	cis	No
ENSG00000163344	1	PMVK	154897210	rs6672856	1	153986119	C	T	0.696895	-0.00415146	0.00693804	0.549598	0.303113	0.0776396	9.45756e-05	-0.0136961	0.0231566	0.554215	0.727475	6	cis	No
ENSG00000169418	1	NPR1	153651113	rs6427268	1	153720690	G	A	0.479575	0.00457062	0.00641169	0.475934	0.338647	0.0714602	2.148168e-06	0.0134967	0.0191463	0.480856	0.54818	13	cis	No
ENSG00000198837	1	DENND4B	153901977	rs113191295	1	153912623	G	A	0.937675	-0.00406106	0.0169641	0.810802	1.31674	0.149539	1.304867e-18	-0.00308418	0.0128882	0.810871	0.340628	12	cis	No
ENSG00000116741	1	RGS2	192778169	rs56270536	1	192751967	T	G	0.935388	-0.000183958	0.0113998	0.987125	0.595884	0.154717	0.000117426	-0.000308714	0.0191311	0.987125	NA	NA	cis	No
ENSG00000122176	1	FMOD	203309756	rs4971252	1	203320408	G	C	0.129202	0.00207295	0.00875643	0.812862	0.782237	0.0639681	2.18822e-34	0.00265003	0.0111962	0.812897	0.631896	20	cis	No
ENSG00000132676	1	DAP3	155657751	rs67579710	1	155173527	G	A	0.89239	-0.0162265	0.0118301	0.170181	-0.633334	0.168456	0.000170163	0.0256208	0.0198834	0.197554	NA	NA	cis	No
ENSG00000116157	1	GPX7	53068044	rs3753754	1	53070393	C	T	0.464286	0.001326	0.00667406	0.842514	-1.06257	0.0376441	2.745922e-175	-0.00124792	0.00628121	0.842517	0.810616	20	cis	No
ENSG00000134744	1	TUT4	52873954	rs7552960	1	52888836	T	A	0.95098	-0.00689815	0.0159867	0.666111	1.01681	0.08039	1.140927e-36	-0.00678411	0.0157316	0.666292	0.958068	20	cis	No
ENSG00000154222	1	CC2D1B	52811395	rs35385323	1	52703491	G	C	0.950747	-0.0085486	0.0161967	0.597639	1.30727	0.0982642	2.205081e-40	-0.00653928	0.0123995	0.597927	0.816134	20	cis	No
ENSG00000272100	1	ENSG00000272100	52819159	rs6588428	1	52820805	G	A	0.939309	-0.00564106	0.0117268	0.630488	0.357588	0.083754	1.959091e-05	-0.0157753	0.0330017	0.632639	0.924741	19	cis	No
ENSG00000116212	1	LRRC42	54411750	rs149357104	1	54705470	C	G	0.979108	0.0275888	0.0289404	0.340438	1.48755	0.363667	4.305999e-05	0.0185465	0.0199764	0.353191	NA	NA	cis	No
ENSG00000116539	1	ASH1L	155305059	rs12037824	1	155415181	G	A	0.768324	-0.00517584	0.00757686	0.494536	0.567835	0.103317	3.884329e-08	-0.00911504	0.0134461	0.497838	0.308616	20	cis	No
ENSG00000177628	1	GBA	155204243	rs1800442	1	155212100	A	G	0.702381	-0.00123695	0.00708927	0.861487	-0.42238	0.058394	4.714926e-13	0.00292852	0.016789	0.861527	0.799763	20	cis	No
ENSG00000203761	1	ENSG00000203761	155581011	rs12032720	1	155274960	G	C	0.745331	-0.00310733	0.00736391	0.673049	-0.504688	0.058976	1.153204e-17	0.00615693	0.0146087	0.673423	0.0931972	20	cis	No
ENSG00000172380	1	GNG12	68167149	rs2249883	1	68294908	A	G	0.66585	-0.00739792	0.00703758	0.293166	0.643682	0.0549504	1.082262e-31	-0.0114931	0.0109773	0.295102	0.254393	20	cis	No
ENSG00000085491	1	SLC25A24	108676658	rs7555404	1	108725558	G	A	0.539916	0.000941107	0.00643336	0.883696	-0.882447	0.0748529	4.443426e-32	-0.00106647	0.00729093	0.883705	0.157367	20	cis	No
ENSG00000134186	1	PRPF38B	109234945	rs4971324	1	109590522	A	G	0.690593	-0.00129882	0.00709051	0.854659	-0.308166	0.0781388	8.019036e-05	0.00421468	0.0230335	0.854814	NA	NA	cis	No
ENSG00000116898	1	MRPS15	36921319	rs71651909	1	36760144	A	G	0.980626	0.0371794	0.0327376	0.256092	1.11993	0.284255	8.152528e-05	0.033198	0.030422	0.275164	NA	NA	cis	No
ENSG00000188786	1	MTF1	38275239	rs28583821	1	38296719	G	A	0.734127	0.032832	0.00717516	4.74426e-06	0.318916	0.0643945	7.325355e-07	0.102949	0.0306315	0.000776955	0.0131086	19	cis	No
ENSG00000204084	1	INPP5B	38326369	rs67704103	1	38291337	C	T	0.707049	-0.00468488	0.0073038	0.521243	0.75459	0.0548463	4.543374e-43	-0.00620851	0.00968968	0.521695	1.782607e-07	20	cis	No
ENSG00000162368	1	CMPK1	47799469	rs12562561	1	47811240	A	G	0.501751	0.00414354	0.00669885	0.536216	0.596935	0.0475173	3.3959e-36	0.00694136	0.0112357	0.536709	0.897336	20	cis	No
ENSG00000077254	1	USP33	78161672	rs1166584	1	78261825	A	G	0.76669	-0.0170408	0.00755127	0.024028	0.29291	0.0646056	5.792793e-06	-0.0581776	0.0287971	0.0433569	0.645759	15	cis	No
ENSG00000171680	1	PLEKHG5	6526152	rs11578105	1	6056315	C	G	0.970938	0.0274293	0.0237286	0.247697	0.889002	0.20399	1.312209e-05	0.030854	0.0276143	0.263856	0.802083	4	cis	No
ENSG00000116985	1	BMP8B	40222854	rs580699	1	40206510	A	G	0.323763	0.022185	0.00687868	0.00125893	-0.870667	0.0787965	2.202735e-28	-0.0254805	0.00823014	0.00196153	0.344288	20	cis	No
ENSG00000173614	1	NMNAT1	10003486	rs479407	1	10673194	G	A	0.0933707	-0.0152203	0.00959425	0.11265	-0.620787	0.151116	3.990757e-05	0.0245177	0.0165673	0.138904	NA	NA	cis	No
ENSG00000121454	1	LHX4	180199421	rs1043744	1	180239535	T	C	0.47584	-0.0144261	0.0067786	0.0333224	0.553207	0.05164	8.866807e-27	-0.0260772	0.0124927	0.0368527	0.810002	20	cis	No
ENSG00000143337	1	TOR1AIP1	179851177	rs511332	1	179911623	G	C	0.296452	0.00279096	0.00715119	0.69633	0.518577	0.100181	2.262103e-07	0.00538196	0.0138292	0.697147	0.348405	20	cis	No
ENSG00000162782	1	TDRD5	179560748	rs1999068	1	179560718	T	C	0.726074	-0.0108396	0.00703957	0.123607	0.949023	0.0494325	3.81976e-82	-0.0114219	0.00744152	0.124813	0.18582	20	cis	No
ENSG00000097046	1	CDC7	91966408	rs13447450	1	91965850	C	T	0.620331	0.00284326	0.00726173	0.695398	-0.911003	0.0471049	2.480248e-83	-0.00312102	0.00797277	0.695457	0.00273032	20	cis	No
ENSG00000134253	1	TRIM45	117653682	rs4658993	1	117679296	G	A	0.415507	0.0164995	0.0109166	0.130683	-0.371962	0.0722979	2.677316e-07	-0.044358	0.0305889	0.147021	0.840315	10	cis	No
ENSG00000132716	1	DCAF8	160185505	rs1886421	1	160309450	G	C	0.48401	-0.00196751	0.00642885	0.759571	-0.274852	0.0575385	1.780718e-06	0.00715843	0.0234382	0.760048	0.826977	20	cis	No
ENSG00000215845	1	TSTD1	161007421	rs3766383	1	161008572	C	A	0.863095	0.0103056	0.00826616	0.212498	-0.700525	0.0663613	4.75397e-26	-0.0147113	0.011882	0.215673	0.0213934	14	cis	No
ENSG00000218510	1	LINC00339	22351681	rs11586488	1	22348556	T	C	0.756536	0.017349	0.00800347	0.0301823	1.13333	0.0463351	3.994806e-132	0.015308	0.00708958	0.030833	0.00429364	20	cis	No
ENSG00000008128	1	CDK11A	1634169	rs9442411	1	1619767	C	T	0.804388	-0.00102847	0.0119257	0.931275	-0.494512	0.0656443	4.95094e-14	0.00207977	0.0241177	0.93128	0.683611	6	cis	No
ENSG00000008130	1	NADK	1682671	rs2011384	1	1694103	A	G	0.0491363	-0.0172235	0.0130929	0.188346	-0.505825	0.105365	1.581352e-06	0.0340503	0.0268385	0.204543	0.829049	12	cis	No
ENSG00000078369	1	GNB1	1716729	rs35511469	1	1802649	G	T	0.797217	0.00239536	0.00814001	0.768552	0.519727	0.0762783	9.520891e-12	0.00460888	0.0156767	0.768761	0.57348	20	cis	No
ENSG00000175756	1	AURKAIP1	1309110	rs12758705	1	1873625	G	A	0.766402	0.010388	0.00765645	0.174858	-0.406904	0.089108	4.961411e-06	-0.0255294	0.0196293	0.193405	0.920648	9	cis	No
ENSG00000189339	1	SLC35E2B	1592939	rs72634825	1	1601015	G	A	0.744514	0.00510286	0.010536	0.628154	-1.24876	0.0475933	9.753241e-152	-0.00408634	0.00843861	0.628213	0.984442	20	cis	No
ENSG00000215914	1	MMP23A	1631369	rs28736713	1	1617586	T	G	0.565009	-0.00771579	0.00865935	0.37291	-0.578945	0.0661333	2.055397e-18	0.0133273	0.0150344	0.375372	0.440284	20	cis	No
ENSG00000221978	1	CCNL2	1321091	rs2643899	1	2266078	T	C	0.533797	0.0037388	0.0070644	0.596635	0.227206	0.0667241	0.000661259	0.0164556	0.0314658	0.600998	NA	NA	cis	No
ENSG00000227775	1	ENSG00000227775	1655951	rs9661500	1	1590681	A	G	0.69281	0.000755307	0.00961102	0.937361	1.07048	0.0550089	2.39262e-84	0.000705578	0.00897831	0.937361	0.775121	20	cis	No
ENSG00000231050	1	ENSG00000231050	1822910	rs10907191	1	1774820	A	T	0.485761	-0.0119268	0.00641085	0.0628271	0.498262	0.0551623	1.675562e-19	-0.0239368	0.0131365	0.0684306	0.303909	20	cis	No
ENSG00000248333	1	CDK11B	1570603	rs72634825	1	1601015	G	A	0.744514	0.00510286	0.010536	0.628154	-0.672601	0.0647748	2.942038e-25	-0.00758676	0.0156816	0.628528	0.937414	20	cis	No
ENSG00000007923	1	DNAJC11	6694228	rs3789572	1	6732568	G	T	0.665149	-0.0118548	0.00668644	0.0762362	-0.63893	0.0838923	2.615093e-14	0.0185541	0.0107449	0.0842055	0.0124065	20	cis	No
ENSG00000142910	1	TINAGL1	32042116	rs9425886	1	33032412	G	T	0.489262	-0.00128224	0.00688874	0.852339	0.393713	0.0918718	1.823622e-05	-0.00325679	0.0175134	0.852476	0.980593	3	cis	No
ENSG00000162512	1	SDC3	31342314	rs2807011	1	31326404	T	C	0.346755	0.0072836	0.00736753	0.322855	-0.435544	0.0951132	4.667194e-06	-0.016723	0.0173054	0.333872	0.521316	8	cis	No
ENSG00000163362	1	INAVA	200860176	rs447284	1	200885246	G	A	0.480159	-0.0120236	0.00663982	0.0701662	0.540664	0.0967166	2.268226e-08	-0.0222386	0.0129091	0.0849421	0.139503	20	cis	No
ENSG00000116525	1	TRIM62	33611003	rs71647915	1	33689021	C	T	0.790966	-0.00648734	0.00774369	0.402166	0.350733	0.0699746	5.378689e-07	-0.0184965	0.0223849	0.408636	0.300556	16	cis	No
ENSG00000162493	1	PDPN	13909960	rs1772636	1	13947519	A	G	0.677754	-0.00526313	0.00734264	0.473503	0.455993	0.0622015	2.286184e-13	-0.0115421	0.0161793	0.475606	0.345252	7	cis	No
ENSG00000235084	1	ENSG00000235084	15931077	rs57875364	1	15096607	A	G	0.780462	0.0162836	0.0101272	0.107856	-0.310597	0.0995813	0.00181448	-0.0524268	0.0366832	0.152953	NA	NA	cis	No
ENSG00000226029	1	LINC01772	16787443	rs279784	1	16780060	C	T	0.7088	0.0148595	0.00757477	0.0497961	-0.744963	0.0948551	4.039631e-15	-0.0199466	0.0104804	0.0570098	0.556058	17	cis	No
ENSG00000163873	1	GRIK3	37261128	rs114940736	1	37330701	A	G	0.954365	-0.0183929	0.0210672	0.382631	-0.839438	0.144514	6.296425e-09	0.021911	0.0253787	0.387939	0.903843	3	cis	No
ENSG00000236021	1	ENSG00000236021	176176784	rs71645245	1	175384090	A	G	0.925654	-0.00480721	0.0119869	0.688393	0.428421	0.122147	0.000452459	-0.0112208	0.0281616	0.690304	NA	NA	cis	No
ENSG00000004455	1	AK2	33473585	rs10157034	1	33557021	G	A	0.727824	-0.00585859	0.00711914	0.410545	-0.306124	0.0817168	0.000179565	0.019138	0.0238103	0.42153	0.487516	3	cis	No
ENSG00000135823	1	STX6	180941861	rs6692913	1	181005644	G	A	0.670518	0.00256511	0.00705736	0.716256	0.523499	0.0955538	4.28756e-08	0.00489993	0.0135108	0.716852	0.980215	14	cis	No
ENSG00000153029	1	MR1	181003067	rs10797666	1	181018799	A	C	0.719071	-0.00106213	0.00719574	0.882654	0.300524	0.0602528	6.109598e-07	-0.00353426	0.0239545	0.882705	0.991045	20	cis	No
ENSG00000143226	1	FCGR2A	161475220	rs116660017	1	161469771	T	A	0.968721	0.00902394	0.0176182	0.608514	-0.987383	0.162367	1.192919e-09	-0.00913925	0.0179065	0.60978	0.991038	8	cis	No
ENSG00000066557	1	LRRC40	70610488	rs12741230	1	70347242	T	C	0.959034	0.0199061	0.0213433	0.350996	0.792421	0.196863	5.691621e-05	0.0251206	0.0276478	0.363565	0.136554	3	cis	No
ENSG00000249237	1	ENSG00000249237	84810361	rs77258906	1	84126004	C	T	0.814659	0.00163123	0.00881601	0.853206	-0.355534	0.0859919	3.557211e-05	-0.00458811	0.0248214	0.85335	0.127681	3	cis	No
ENSG00000231407	1	ENSG00000231407	170429594	rs1333135	1	170472532	A	G	0.858427	-0.00801415	0.0105648	0.44811	0.758472	0.0737749	8.592243e-25	-0.0105662	0.0139669	0.449341	0.421635	20	cis	No
ENSG00000117461	1	PIK3R3	46505812	rs12022673	1	46119373	T	C	0.727358	0.00879155	0.0110026	0.424266	-0.469637	0.10543	8.409163e-06	-0.0187199	0.0238018	0.431581	0.348167	12	cis	No
ENSG00000117480	1	FAAH	46859937	rs41293285	1	46808426	C	T	0.727634	-0.00313953	0.00812564	0.699221	-1.12663	0.0716644	1.087418e-55	0.00278666	0.00721452	0.699307	0.50417	16	cis	No
ENSG00000117481	1	NSUN4	46805849	rs72885163	1	46807117	C	A	0.698529	-0.00341433	0.00813077	0.674539	-0.994111	0.0816978	4.593626e-34	0.00343456	0.0081838	0.674721	0.0119311	20	cis	No
ENSG00000159588	1	CCDC17	46085716	rs61784800	1	46178112	A	G	0.303922	-0.00904826	0.0068894	0.189062	0.282657	0.0774319	0.000261836	-0.0320114	0.0259033	0.21653	0.931718	4	cis	No
ENSG00000171357	1	LURAP1	46669006	rs7521617	1	46664754	C	T	0.664449	0.0120514	0.00717756	0.0931453	0.43043	0.0603248	9.664488e-13	0.0279985	0.0171308	0.102176	0.532269	20	cis	No
ENSG00000173660	1	UQCRH	46769303	rs77526109	1	46780007	C	A	0.901261	-0.00971018	0.012374	0.432614	-1.10593	0.0850436	1.157051e-38	0.0087801	0.0112091	0.433451	0.0058471	20	cis	No
ENSG00000143845	1	ETNK2	204100190	rs35868158	1	203940762	A	T	0.933707	0.000555099	0.0143744	0.969196	-0.599662	0.14999	6.387622e-05	-0.000925686	0.023972	0.969197	0.934333	6	cis	No
ENSG00000162745	1	OLFML2B	161952982	rs143622373	1	161977397	T	G	0.982143	0.0125647	0.0305632	0.680994	1.19821	0.292966	4.315156e-05	0.0104862	0.0256359	0.682507	0.79509	3	cis	No
ENSG00000162813	1	BPNT1	220230824	rs17563262	1	220240862	A	G	0.814893	-0.00522786	0.00868785	0.547345	0.697562	0.0720977	3.842359e-22	-0.00749447	0.0124787	0.548118	0.0520514	20	cis	No
ENSG00000154380	1	ENAH	225674537	rs6426083	1	225895934	G	T	0.692227	-0.0146936	0.00702012	0.0363423	0.534883	0.0969731	3.472179e-08	-0.0274707	0.0140378	0.0503578	0.50129	20	cis	No
ENSG00000160049	1	DFFA	10516579	rs1755592	1	10565947	A	C	0.503035	-0.00431363	0.00647915	0.505557	0.384457	0.0724573	1.120681e-07	-0.0112201	0.0169849	0.508875	0.997837	20	cis	No
ENSG00000116171	1	SCP2	53392901	rs7544053	1	53460369	G	A	0.929505	0.0011863	0.0101706	0.907145	0.632696	0.100428	2.976727e-10	0.00187499	0.0160778	0.907161	0.53949	16	cis	No
ENSG00000162377	1	COA7	53152508	rs856721	1	53162156	C	A	0.5	-0.0126839	0.00728348	0.0816033	0.52578	0.0857572	8.73123e-10	-0.024124	0.0144007	0.0938959	0.0645212	18	cis	No
ENSG00000162378	1	ZYG11B	53192126	rs479581	1	53278517	G	C	0.62465	0.0211402	0.00675158	0.00174125	0.52663	0.0565414	1.230306e-20	0.0401424	0.0135254	0.00299813	0.0305759	20	cis	No
ENSG00000188641	1	DPYD	97543299	rs2811167	1	98011140	G	A	0.978641	-0.0220519	0.0258661	0.393916	-0.874833	0.199686	1.181131e-05	0.025207	0.0301215	0.402681	NA	NA	cis	No
ENSG00000163155	1	LYSMD1	151132224	rs7528275	1	151103537	C	T	0.0423669	0.0299345	0.0154547	0.0527553	-0.804536	0.142199	1.533252e-08	-0.0372072	0.020304	0.0668757	0.161271	20	cis	No
ENSG00000197530	1	MIB2	1550795	rs28525262	1	1584102	G	A	0.532796	-0.00381117	0.00873504	0.662613	-0.432865	0.0537746	8.305305e-16	0.00880452	0.0202092	0.663077	0.901291	20	cis	No
ENSG00000272106	1	ENSG00000272106	1549138	rs28525262	1	1584102	G	A	0.532796	-0.00381117	0.00873504	0.662613	-0.359949	0.0546103	4.362179e-11	0.0105881	0.0243205	0.663304	0.857298	17	cis	No
ENSG00000133059	1	DSTYK	205111632	rs61822619	1	205090885	C	G	0.551237	-0.00358453	0.00713577	0.615434	0.438872	0.0564523	7.592124e-15	-0.0081676	0.0162932	0.616169	0.0011326	20	cis	No
ENSG00000077585	1	GPR137B	236305832	rs10802261	1	236298319	C	T	0.970238	-0.0226825	0.0137547	0.0991325	0.561779	0.123322	5.229432e-06	-0.0403762	0.0260391	0.120998	NA	NA	cis	No
ENSG00000143499	1	SMYD2	214454445	rs12039689	1	214448021	C	T	0.947946	0.0311506	0.0144757	0.0314028	-0.979587	0.127788	1.778575e-14	-0.0317997	0.0153486	0.0382807	0.296763	12	cis	No
ENSG00000230461	1	PROX1-AS1	213991094	rs150919682	1	213804492	T	G	0.954248	0.0597434	0.0181469	0.00099401	-0.870858	0.220682	7.939977e-05	-0.0686029	0.0271375	0.0114722	0.412016	4	cis	No
ENSG00000182827	1	ACBD3	226332380	rs60311516	1	226259804	T	C	0.920868	0.00321538	0.0114966	0.779723	0.661535	0.168021	8.243583e-05	0.00486048	0.0174225	0.780262	0.492692	3	cis	No
ENSG00000272562	1	ENSG00000272562	226248413	rs12145393	1	226213821	T	G	0.162698	-0.00664268	0.00857446	0.438513	0.346534	0.0899054	0.000116	-0.0191689	0.0252383	0.447544	NA	NA	cis	No
ENSG00000117362	1	APH1A	150237804	rs35938158	1	150213828	T	C	0.591387	0.0163105	0.00665454	0.0142444	0.522043	0.0851839	8.875409e-10	0.0312436	0.0137288	0.0228598	0.167475	20	cis	No
ENSG00000118292	1	C1orf54	150240600	rs144806132	1	150335489	A	G	0.98401	-0.0210441	0.0349819	0.54746	-1.66837	0.213241	5.122225e-15	0.0126136	0.0210296	0.548639	0.908196	15	cis	No
ENSG00000118298	1	CA14	150229554	rs1776270	1	150369337	G	A	0.373016	0.000724987	0.00672207	0.914113	-0.387699	0.0877849	1.003269e-05	-0.00186997	0.0173435	0.914139	0.0512498	20	cis	No
ENSG00000143369	1	ECM1	150480538	rs71622702	1	150514747	C	T	0.905462	-0.00256276	0.0128953	0.84247	0.487849	0.101416	1.506649e-06	-0.00525318	0.0264555	0.842602	0.346924	15	cis	No
ENSG00000143374	1	TARS2	150459887	rs11582423	1	150493925	C	G	0.604692	-0.0116998	0.00666986	0.0794083	-0.407561	0.0564838	5.371879e-13	0.0287069	0.016842	0.0882904	0.130166	20	cis	No
ENSG00000143457	1	GOLPH3L	150618701	rs12117525	1	150993866	G	A	0.473623	-0.00188771	0.00649007	0.771157	-0.411717	0.0931259	9.820864e-06	0.00458497	0.0157975	0.771637	0.573625	6	cis	No
ENSG00000204138	1	PHACTR4	28696114	rs61783805	1	28717901	T	C	0.668986	0.00446349	0.0146316	0.760322	-0.417983	0.0680475	8.122248e-10	-0.0106786	0.0350484	0.760608	0.68084	20	cis	No
ENSG00000076321	1	KLHL20	173684080	rs9425745	1	173780826	T	G	0.717787	-0.00953836	0.00707898	0.177845	0.328585	0.0743942	1.00169e-05	-0.0290286	0.022524	0.197473	0.65973	14	cis	No
ENSG00000215795	1	LOC100131465	247347115	rs11588486	1	247362282	C	T	0.846405	-0.00675113	0.00954193	0.479242	1.17785	0.0672181	9.59473e-69	-0.00573174	0.00810774	0.4796	0.162142	20	cis	No
ENSG00000259865	1	ENSG00000259865	247350583	rs60050650	1	247376776	T	C	0.723623	0.00998044	0.00703778	0.156155	0.77612	0.0536517	1.989696e-47	0.0128594	0.00911137	0.158139	0.913877	20	cis	No
ENSG00000116406	1	EDEM3	184659365	rs2207733	1	184687715	C	T	0.505019	0.000304149	0.00644698	0.962372	-0.681286	0.0473775	6.914011e-47	-0.000446434	0.00946301	0.962372	0.10589	20	cis	No
ENSG00000000457	1	SCYL3	169818772	rs10157398	1	169756548	G	C	0.573413	0.00655503	0.00684958	0.338569	-0.314051	0.0751102	2.899731e-05	-0.0208725	0.0223744	0.350885	0.352944	9	cis	No
ENSG00000116750	1	UCHL5	192981380	rs72742120	1	193381652	G	T	0.954715	-0.00118151	0.0185614	0.949245	-0.559827	0.132771	2.481327e-05	0.00211049	0.0331594	0.949251	0.868694	4	cis	No
ENSG00000150681	1	RGS18	192127587	rs1175174	1	192170415	C	T	0.320261	-0.00791918	0.00723922	0.273987	-0.343102	0.0558233	7.935326e-10	0.0230811	0.0214309	0.28148	0.373984	17	cis	No
ENSG00000116604	1	MEF2D	156433519	rs2842868	1	156196407	T	G	0.706699	-0.00113037	0.0079148	0.886435	0.368174	0.0784503	2.691122e-06	-0.00307021	0.0215074	0.886487	0.523057	12	cis	No
ENSG00000117036	1	ETV3	157090983	rs983227	1	157070791	G	A	0.975373	-0.000945835	0.0163536	0.953879	-1.01024	0.262764	0.000120715	0.000936248	0.0161897	0.953884	NA	NA	cis	No
ENSG00000160783	1	PMF1	156182784	rs2984613	1	156197380	C	T	0.638072	0.00187927	0.00674011	0.780383	-0.583186	0.0956855	1.095581e-09	-0.00322242	0.0115695	0.780607	0.569495	10	cis	No
ENSG00000134686	1	PHC2	33789224	rs6670552	1	33724895	C	T	0.254902	-0.00440808	0.0074609	0.554639	-0.563745	0.0956262	3.740057e-09	0.00781928	0.0133008	0.556613	0.104911	20	cis	No
ENSG00000160094	1	ZNF362	33722146	rs4132073	1	33723211	G	A	0.29225	-0.00806108	0.00719133	0.262311	0.395725	0.060584	6.496543e-11	-0.0203704	0.0184382	0.269249	0.0201339	20	cis	No
ENSG00000160752	1	FDPS	155278539	rs144847100	1	156206718	T	G	0.966036	0.0151382	0.0226993	0.504836	0.799592	0.224265	0.000363308	0.0189324	0.028881	0.512125	NA	NA	cis	No
ENSG00000160767	1	FAM189B	155216996	rs12089941	1	154827520	T	C	0.708567	0.0105004	0.00824066	0.202584	0.440996	0.100892	1.236971e-05	0.0238106	0.0194643	0.221217	0.220273	4	cis	No
ENSG00000224520	1	KRT8P45	157043049	rs115980289	1	157479408	C	T	0.943044	0.0185537	0.0171726	0.279953	-0.828346	0.223769	0.000214088	-0.0223985	0.0215961	0.299665	NA	NA	cis	No
ENSG00000162894	1	FCMR	207077731	rs7546693	1	207366209	C	T	0.365313	-0.000690954	0.00674953	0.918463	0.312833	0.0754015	3.340808e-05	-0.0022087	0.0215821	0.918487	0.561248	5	cis	No
ENSG00000196352	1	CD55	207494853	rs2089493	1	207549179	T	C	0.485761	0.00723693	0.00648326	0.264316	-0.275386	0.0708895	0.000102446	-0.0262792	0.0244951	0.283344	0.814692	7	cis	No
ENSG00000183431	1	SF3A3	38422647	rs10890238	1	38445654	T	A	0.573996	0.05213	0.00652499	1.35724e-15	0.453445	0.0533514	1.908845e-17	0.114964	0.0197492	5.842501e-09	0.00256005	20	cis	No
ENSG00000116194	1	ANGPTL1	178818840	rs3753535	1	178836971	T	C	0.681489	-0.00385332	0.00719939	0.592491	0.618123	0.0534276	5.89245e-31	-0.0062339	0.0116596	0.592887	0.421041	20	cis	No
ENSG00000163565	1	IFI16	158969758	rs3754466	1	158977947	A	C	0.982493	0.0233675	0.0139181	0.0931655	1.25787	0.164969	2.442835e-14	0.018577	0.0113299	0.101078	0.346967	11	cis	No
ENSG00000057468	1	MSH4	76262567	rs1146637	1	76256618	A	G	0.419351	0.00950145	0.00718743	0.186184	0.545389	0.052922	6.653382e-25	0.0174214	0.0132865	0.189787	0.0313611	20	cis	No
ENSG00000272864	1	ENSG00000272864	75164453	rs12146002	1	75167867	G	A	0.523459	0.004879	0.0070183	0.486941	-0.838555	0.0446374	9.843033e-79	-0.00581834	0.00837525	0.487239	0.674673	20	cis	No
ENSG00000160062	1	ZBTB8A	33005028	rs3935892	1	33737426	C	A	0.881769	-0.0154284	0.011001	0.160778	-0.591294	0.151676	9.682704e-05	0.0260926	0.0197723	0.18695	0.33591	4	cis	No
ENSG00000222112	1	RN7SKP16	33802167	rs80121831	1	34464429	G	A	0.979108	-0.000345672	0.025426	0.989153	0.996618	0.23998	3.282592e-05	-0.000346845	0.0255124	0.989153	NA	NA	cis	No
ENSG00000198626	1	RYR2	237205505	rs2485596	1	237273254	A	G	0.747199	-0.0013116	0.00708912	0.853216	0.433901	0.104953	3.561539e-05	-0.00302281	0.0163545	0.853362	0.387606	5	cis	No
ENSG00000067533	1	RRP15	218458629	rs10863387	1	218471383	T	C	0.575397	-0.000770238	0.00663785	0.907623	0.602284	0.0511754	5.637263e-32	-0.00127886	0.0110217	0.907628	0.00277501	17	cis	No
ENSG00000081237	1	PTPRC	198607801	rs61819649	1	199639087	A	G	0.977591	-0.0117404	0.0287994	0.683524	1.50872	0.432584	0.000487207	-0.0077817	0.0192186	0.685548	NA	NA	cis	No
ENSG00000231940	1	RPS7P3	233424614	rs12118654	1	233280927	T	C	0.564542	-0.00544793	0.00680043	0.423064	0.286234	0.0710047	5.549276e-05	-0.0190331	0.0242229	0.432014	0.0717895	3	cis	No
ENSG00000084636	1	COL16A1	32117848	rs12082910	1	31957837	A	G	0.353058	0.00391438	0.00669372	0.558693	-0.255348	0.0746067	0.000620277	-0.0153296	0.026594	0.564324	NA	NA	cis	No
ENSG00000143624	1	INTS3	153700543	rs4345834	1	153743317	G	A	0.57493	-0.00668138	0.00701375	0.340787	-0.3148	0.0727529	1.511701e-05	0.0212242	0.0228136	0.352199	0.718461	11	cis	No
ENSG00000244682	1	ENSG00000244682	161551129	rs71632989	1	161533055	T	G	0.873016	0.00433025	0.011629	0.709621	-0.824087	0.0868405	2.317755e-21	-0.0052546	0.0141222	0.709833	0.0790467	20	cis	No
ENSG00000137955	1	RABGGTB	76251879	rs115731616	1	77138973	G	A	0.966036	-0.0567554	0.0227703	0.0126841	1.042	0.273868	0.000141944	-0.0544678	0.0261241	0.0370731	NA	NA	cis	No
ENSG00000120341	1	SEC16B	177893091	rs6425457	1	177937441	A	G	0.616597	0.00483742	0.00684661	0.479851	0.563427	0.0959069	4.235397e-09	0.00858571	0.0122393	0.482999	0.403098	15	cis	No
ENSG00000273062	1	ENSG00000273062	178693441	rs3828137	1	177920754	G	A	0.588819	0.00682818	0.00699356	0.328889	0.261875	0.0699008	0.000179403	0.0260742	0.0275977	0.344764	0.604967	5	cis	No
ENSG00000168243	1	GNG4	235710987	rs4659987	1	235811238	T	C	0.341036	-0.0123649	0.00726854	0.088915	-0.814317	0.0530176	3.064851e-53	0.0151844	0.00898051	0.0908723	0.94087	20	cis	No
ENSG00000225217	1	ENSG00000225217	161576081	rs2099684	1	161500130	A	G	0.672269	0.0113669	0.00708962	0.108866	-0.548716	0.059847	4.789689e-20	-0.0207155	0.0131164	0.114256	0.678489	20	cis	No
ENSG00000225880	1	LINC00115	761586	rs3115850	1	761147	T	C	0.156162	0.00304214	0.0118088	0.796704	-0.684366	0.0660987	4.026396e-25	-0.00444519	0.0172604	0.796764	0.0188451	5	cis	No
ENSG00000154358	1	OBSCN	228395831	rs2066237	1	228359775	T	C	0.372763	-0.00327733	0.0079184	0.678956	0.439518	0.0713342	7.210941e-10	-0.00745665	0.0180567	0.679638	0.566527	20	cis	No
ENSG00000026751	1	SLAMF7	160709037	rs1328111	1	160726891	G	T	0.677521	-0.00172466	0.00753962	0.819066	-0.357011	0.0621085	9.02063e-09	0.00483083	0.0211354	0.819207	0.507714	10	cis	No
ENSG00000179639	1	FCER1A	159259504	rs6703348	1	159291683	C	G	0.739846	-0.00264893	0.00816358	0.745574	0.551889	0.0644969	1.160102e-17	-0.00479975	0.0148027	0.74575	0.90098	20	cis	No
ENSG00000197989	1	SNHG12	28905050	rs9426290	1	28943253	T	A	0.722456	-0.0045277	0.00780701	0.561946	-0.406646	0.0627238	8.984553e-11	0.0111343	0.0192752	0.563503	0.414718	20	cis	No
ENSG00000180198	1	RCC1	28832455	rs41284311	1	28530167	C	T	0.979575	-0.0145233	0.0263228	0.581129	1.45329	0.219145	3.31966e-11	-0.00999339	0.0181751	0.58243	0.774169	9	cis	No
ENSG00000143303	1	METTL25B	156698234	rs3806415	1	156698265	C	T	0.672502	-0.0193611	0.0073483	0.0084193	0.380189	0.0603656	3.012972e-10	-0.0509249	0.0209512	0.0150718	0.841035	11	cis	No
ENSG00000133065	1	SLC41A1	205758221	rs708727	1	205767885	G	A	0.578782	-0.0199792	0.00743604	0.00721389	0.389469	0.0670788	6.393018e-09	-0.0512986	0.0210379	0.0147531	0.593645	20	cis	No
ENSG00000143479	1	DYRK3	206808881	rs6657352	1	206641869	A	G	0.0710784	-0.00908857	0.015092	0.547033	0.58659	0.173393	0.000716966	-0.0154939	0.0261328	0.553254	NA	NA	cis	No
ENSG00000130762	1	ARHGEF16	3370990	rs4422946	1	3394640	A	G	0.0547386	0.0054405	0.0128473	0.67195	-0.705231	0.131991	9.141042e-08	-0.00771449	0.0182743	0.672915	0.67835	11	cis	No
ENSG00000171385	1	KCND3	112313284	rs11102461	1	112888622	G	A	0.597572	-0.00602421	0.00652273	0.355709	-0.357026	0.0715573	6.057609e-07	0.0168733	0.01858	0.363802	0.377449	10	cis	No
ENSG00000175137	1	SH3BP5L	249104648	rs12029054	1	249121038	A	C	0.871148	0.0189565	0.00842601	0.0244643	-0.604603	0.0670544	1.940022e-19	-0.0313536	0.0143637	0.0290478	0.520432	20	cis	No
ENSG00000159596	1	TMEM69	46152886	rs11590549	1	46086329	C	T	0.756769	0.00527111	0.00825085	0.522916	-0.311869	0.068629	5.51257e-06	-0.0169017	0.0267163	0.526972	0.15344	14	cis	No
ENSG00000185483	1	ROR1	64239693	rs7544601	1	64150255	T	C	0.967204	-0.0382692	0.0204177	0.060887	-0.777797	0.129617	1.964193e-09	0.049202	0.0275014	0.0736029	0.274477	6	cis	No
ENSG00000168653	1	NDUFS5	39491990	rs7416577	1	39488851	C	G	0.695261	-0.00618812	0.00693314	0.372103	-1.1934	0.0371678	3.364681e-226	0.00518529	0.00581181	0.372287	0.00599991	20	cis	No
ENSG00000085840	1	ORC1	52838501	rs2820338	1	52799395	A	G	0.0599907	0.0059334	0.0117454	0.613442	-0.645611	0.153769	2.685932e-05	-0.00919036	0.0183239	0.615984	0.414498	18	cis	No
ENSG00000197965	1	MPZL1	167690429	rs4657703	1	167707554	G	A	0.897993	0.0150631	0.0117856	0.201216	0.577088	0.0857399	1.688693e-11	0.0261019	0.0207875	0.209241	0.536671	14	cis	No
ENSG00000198160	1	MIER1	67390578	rs11208979	1	67442275	C	T	0.737162	0.0322757	0.00779041	3.42781e-05	0.372155	0.0833942	8.097102e-06	0.0867265	0.0285637	0.0023954	0.0356702	7	cis	No
ENSG00000143324	1	XPR1	180601140	rs4652524	1	180600970	A	G	0.160247	0.00392622	0.0100257	0.695341	0.383446	0.0718423	9.432588e-08	0.0102393	0.0262166	0.696118	0.510835	11	cis	No
ENSG00000197472	1	ZNF695	247108849	rs74506539	1	247178854	C	A	0.894725	0.0048672	0.0127138	0.701847	-0.919129	0.0846147	1.738842e-27	-0.00529545	0.013841	0.702023	0.146713	20	cis	No
ENSG00000185104	1	FAF1	50905150	rs12743369	1	50564416	A	G	0.435574	-0.0141028	0.00717388	0.049316	-0.358473	0.0942656	0.00014307	0.0393413	0.0225282	0.0807563	NA	NA	cis	No
ENSG00000116885	1	OSCP1	36881428	rs6662907	1	36911913	T	C	0.690943	0.00775839	0.00681871	0.255201	0.343517	0.0585903	4.544751e-09	0.0225852	0.02022	0.264007	0.863031	15	cis	No
ENSG00000181817	1	LSM10	36856839	rs61771050	1	36884284	A	G	0.688259	0.00814787	0.00676844	0.228666	0.282851	0.0721151	8.773795e-05	0.0288062	0.0250311	0.249806	0.241101	9	cis	No
ENSG00000185278	1	ZBTB37	173837220	rs78404795	1	174085380	T	G	0.990896	0.0158621	0.0424203	0.708458	1.66983	0.429769	0.000102158	0.00949923	0.0255213	0.709738	NA	NA	cis	No
ENSG00000270084	1	ENSG00000270084	173832386	rs12078824	1	173820365	T	C	0.674953	-0.0112835	0.00680991	0.0975338	-0.30313	0.0732523	3.500972e-05	0.0372233	0.0241992	0.123999	0.83118	15	cis	No
ENSG00000225762	1	ENSG00000225762	47846600	rs61773507	1	48411428	G	A	0.861111	-0.00826637	0.0113756	0.467425	-0.436007	0.1327	0.00101742	0.0189593	0.0267209	0.477996	NA	NA	cis	No
ENSG00000162885	1	B3GALNT2	235613238	rs696247	1	235668161	T	C	0.484594	-0.00887461	0.00682442	0.193457	-0.716398	0.0487494	6.886047e-49	0.0123878	0.00956324	0.195197	0.124296	20	cis	No
ENSG00000227630	1	LINC01132	234859789	rs12726475	1	234861320	C	T	0.961368	0.0033329	0.0191754	0.862014	0.85251	0.111947	2.630655e-14	0.00390951	0.0224987	0.862049	0.427878	9	cis	No
ENSG00000173846	1	PLK3	45265897	rs3923304	1	45274841	T	C	0.84057	0.0126726	0.00848464	0.135282	-0.558595	0.124202	6.876056e-06	-0.0226866	0.0160049	0.156345	0.149997	11	cis	No
ENSG00000225447	1	ENSG00000225447	46111488	rs112248598	1	45472135	G	A	0.982107	0.044753	0.0301034	0.137109	-0.765802	0.212499	0.000313602	-0.0584394	0.042523	0.169349	NA	NA	cis	No
ENSG00000143793	1	C1orf35	228288427	rs708107	1	228189495	C	T	0.493814	-0.00523657	0.00641221	0.414125	-0.257107	0.0723257	0.000378195	0.0203673	0.0255895	0.426077	0.257206	4	cis	No
ENSG00000054523	1	KIF1B	10270863	rs11121529	1	10271688	C	G	0.885971	0.0121088	0.0113484	0.285968	0.457088	0.0777467	4.122608e-09	0.0264912	0.0252332	0.293785	0.425647	19	cis	No
ENSG00000162441	1	LZIC	9982173	rs2765552	1	10458766	A	C	0.980976	0.0287308	0.0267834	0.283402	-1.06559	0.295386	0.000309226	-0.0269623	0.0262225	0.303849	0.174625	4	cis	No
ENSG00000178585	1	CTNNBIP1	9908334	rs1220382	1	9959748	C	T	0.819678	0.00405698	0.00931297	0.663107	0.572329	0.076113	5.499993e-14	0.00708855	0.0162993	0.663637	0.22483	11	cis	No
ENSG00000135838	1	NPL	182758428	rs6694132	1	182119516	C	T	0.69211	-0.013028	0.00694014	0.0604919	0.414411	0.0977685	2.2482e-05	-0.0314374	0.0183158	0.0860881	0.972795	7	cis	No
ENSG00000143344	1	RGL1	183605220	rs699240	1	183554449	T	C	0.537698	-0.0338164	0.00687997	8.86975e-07	0.341729	0.0874064	9.242721e-05	-0.0989568	0.0323415	0.00221522	NA	NA	cis	No
ENSG00000086015	1	MAST2	46252659	rs10789475	1	46304177	C	G	0.562792	-0.0126457	0.0065814	0.0546773	0.522286	0.0691126	4.123685e-14	-0.0242122	0.0130021	0.0625776	0.313991	20	cis	No
ENSG00000126088	1	UROD	45477819	rs2298005	1	45476663	G	A	0.75105	0.0186349	0.00725259	0.0101872	-0.544917	0.0803954	1.218832e-11	-0.0341977	0.0142338	0.0162801	0.624344	20	cis	No
ENSG00000159592	1	GPBP1L1	46092976	rs11211215	1	46347813	A	G	0.702965	0.0149609	0.00705764	0.0340218	-0.348524	0.0614638	1.424709e-08	-0.0429265	0.0216189	0.0470775	0.0369936	13	cis	No
ENSG00000234329	1	RPL7AP16	46116711	rs3013594	1	46138000	T	C	0.454248	0.012493	0.0065137	0.0551155	0.334858	0.0721656	3.481863e-06	0.0373084	0.0210483	0.0763103	0.413591	16	cis	No
ENSG00000034971	1	MYOC	171604557	rs7541132	1	171631297	A	G	0.934407	-0.0205335	0.0120138	0.0874213	0.436445	0.0927196	2.512068e-06	-0.0470472	0.0292849	0.108157	0.0169907	7	cis	No
ENSG00000229167	1	ENSG00000229167	32037186	rs1977657	1	32031651	A	T	0.558707	0.00611654	0.00703161	0.384375	-0.306432	0.0558118	4.009139e-08	-0.0199605	0.0232329	0.390259	0.82303	13	cis	No
ENSG00000185499	1	MUC1	155158300	rs4971100	1	155155731	G	A	0.579715	0.00725684	0.00684275	0.28891	0.37947	0.05428	2.72996e-12	0.0191236	0.0182387	0.294399	0.0797163	20	cis	No
ENSG00000248485	1	PCP4L1	161228517	rs11265575	1	161227983	T	C	0.652194	0.00921095	0.00681864	0.176744	0.327349	0.0585675	2.280446e-08	0.028138	0.0214296	0.189168	0.370519	13	cis	No
ENSG00000024526	1	DEPDC1	68939835	rs3125918	1	68846246	A	G	0.604458	-0.00578668	0.00708215	0.413883	-0.22361	0.0574543	9.943554e-05	0.0258784	0.0323623	0.423915	0.782335	3	cis	No
ENSG00000196482	1	ESRRG	216676588	rs1890552	1	217153781	A	G	0.862045	0.00996213	0.00826889	0.228291	0.506695	0.104958	1.381931e-06	0.019661	0.0168198	0.242435	0.534647	12	cis	No
ENSG00000116675	1	DNAJC6	65713902	rs12731486	1	66342930	A	G	0.787815	-0.00113561	0.00796791	0.886667	-0.331898	0.0713742	3.317537e-06	0.00342156	0.0240184	0.88672	0.784801	3	cis	No
ENSG00000211454	1	AKR7L	19592476	rs12727433	1	19394724	C	T	0.505486	0.00361517	0.00659804	0.58375	-0.370855	0.0884588	2.760129e-05	-0.0097482	0.0179427	0.586926	0.586447	20	cis	No
ENSG00000058453	1	CROCC	17066768	rs12217103	1	17275895	A	T	0.692843	-0.0191085	0.013494	0.156754	0.759379	0.0596182	3.665148e-37	-0.0251633	0.0178793	0.159308	0.132725	20	cis	No
ENSG00000162383	1	SLC1A7	53552855	rs78624382	1	53547188	G	T	0.95098	-0.00108679	0.0117687	0.926423	-1.20358	0.198259	1.273098e-09	0.000902964	0.00977921	0.926432	0.349449	20	cis	No
ENSG00000228929	1	RPS13P2	53237866	rs144235745	1	52491244	G	A	0.969771	0.00451084	0.0260561	0.862557	-1.28031	0.323018	7.383055e-05	-0.00352324	0.0203708	0.862687	0.826353	5	cis	No
ENSG00000143149	1	ALDH9A1	165631453	rs76855014	1	165662518	C	T	0.676938	0.00201832	0.00987802	0.8381	-0.717464	0.0519966	2.609398e-43	-0.00281313	0.0137695	0.838117	0.937297	10	cis	No
ENSG00000224358	1	ENSG00000224358	165738166	rs6668885	1	165734603	T	C	0.121499	0.00162546	0.011163	0.884228	-1.23364	0.0711565	2.473785e-67	-0.00131761	0.00904915	0.884232	0.04178	20	cis	No
ENSG00000162437	1	RAVER2	65210778	rs1969026	1	65406256	T	C	0.970588	0.030586	0.0277628	0.270598	0.711236	0.184687	0.000117615	0.043004	0.0406005	0.289509	NA	NA	cis	No
ENSG00000133067	1	LGR6	202163029	rs11580571	1	202171405	A	G	0.771125	-0.0246522	0.00751836	0.001042	-0.310145	0.0673298	4.097819e-06	0.079486	0.0297558	0.00755626	0.233034	5	cis	No
ENSG00000260971	1	ENSG00000260971	56713966	rs7550276	1	56893799	T	C	0.635738	-0.00458128	0.00693773	0.509033	-0.400256	0.0935778	1.892148e-05	0.0114459	0.0175386	0.514007	0.428003	7	cis	No
ENSG00000173726	1	TOMM20	235272651	rs6700050	1	235292551	T	A	0.845121	0.0074278	0.0103067	0.471108	0.373199	0.0806906	3.744834e-06	0.0199031	0.0279504	0.476413	0.550462	5	cis	No
ENSG00000065600	1	PACC1	212537273	rs72754339	1	212584261	G	A	0.957166	-0.00350853	0.0138116	0.799474	1.11504	0.133131	5.498805e-17	-0.00314655	0.0123923	0.799564	0.246112	19	cis	No
ENSG00000231246	1	LINC02884	112719856	rs3121423	1	112884163	C	T	0.600257	-0.00512204	0.00652031	0.43213	0.362928	0.07062	2.759601e-07	-0.0141131	0.0181745	0.437435	0.530909	6	cis	No
ENSG00000174021	1	GNG5	84964008	rs7555773	1	84965424	G	A	0.905929	-0.00578897	0.0114787	0.614034	0.607265	0.0779451	6.651647e-15	-0.00953286	0.0189419	0.614775	0.980408	20	cis	No
ENSG00000249087	1	ZNF436-AS1	23695490	rs754984	1	23698120	C	G	0.929739	0.00593155	0.0108171	0.583452	1.68104	0.113622	1.578574e-49	0.0035285	0.00643918	0.58371	0.114199	20	cis	No
ENSG00000007933	1	FMO3	171060018	rs6608460	1	171056117	C	G	0.703315	0.0109702	0.00691416	0.112596	0.381861	0.0602972	2.404683e-10	0.0287283	0.0186661	0.123789	0.153411	20	cis	No
ENSG00000137975	1	CLCA2	86889769	rs272498	1	86818846	G	A	0.713352	-0.00292554	0.00691073	0.672052	-0.64027	0.092857	5.377935e-12	0.00456923	0.0108138	0.672633	0.976296	20	cis	No
ENSG00000143748	1	NVL	224415036	rs10916577	1	224442172	G	A	0.051704	0.0122734	0.0133527	0.358008	0.608408	0.0964422	2.817092e-10	0.020173	0.0221787	0.363052	0.701179	12	cis	No
ENSG00000226396	1	ENSG00000226396	19934608	rs72656076	1	19965158	C	G	0.973623	-0.00970921	0.0262695	0.711681	-0.830545	0.208485	6.784423e-05	0.0116902	0.0317651	0.712859	NA	NA	cis	No
ENSG00000238005	1	LOC101927851	235093089	rs36025723	1	235106914	C	T	0.871265	-0.0351578	0.0105815	0.000891959	0.704069	0.0863632	3.567078e-16	-0.0499352	0.0162293	0.00209202	0.00399292	13	cis	No
ENSG00000053372	1	MRTO4	19578033	rs947532	1	19581934	G	T	0.747432	-0.0171598	0.00796015	0.0311058	-0.589244	0.0625747	4.657021e-21	0.0291217	0.0138586	0.03561	0.567231	20	cis	No
ENSG00000162542	1	TMCO4	20008706	rs4912136	1	19986009	C	T	0.466387	-0.00399481	0.0116157	0.73091	0.402919	0.0927653	1.402791e-05	-0.00991467	0.0289191	0.731718	0.703685	11	cis	No
ENSG00000162543	1	UBXN10	20512578	rs2301475	1	20499168	T	C	0.686275	-0.00368987	0.00679198	0.586945	0.480109	0.0947402	4.027862e-07	-0.00768548	0.0142278	0.589077	0.104483	4	cis	No
ENSG00000143190	1	POU2F1	167190066	rs12037793	1	167057601	A	G	0.771592	-0.0187464	0.00783938	0.0167884	0.444465	0.104744	2.202068e-05	-0.0421774	0.0202457	0.0372258	0.185691	8	cis	No
ENSG00000272084	1	ENSG00000272084	19398604	rs78695089	1	19402242	C	A	0.903245	-0.00900679	0.0125835	0.474139	0.550844	0.0896569	8.051438e-10	-0.0163509	0.0229985	0.477113	0.507596	15	cis	No
ENSG00000137936	1	BCAR3	94027347	rs115960459	1	93654814	T	C	0.967204	0.0298261	0.0225696	0.186329	1.22247	0.292491	2.921328e-05	0.0243982	0.0193632	0.207658	NA	NA	cis	No
ENSG00000155367	1	PPM1J	113252616	rs1890400	1	112783743	C	A	0.872432	0.0059108	0.0109284	0.588599	0.413033	0.102788	5.862327e-05	0.0143107	0.0266975	0.591936	NA	NA	cis	No
ENSG00000198799	1	LRIG2	113615831	rs72685622	1	113692214	C	T	0.857493	-0.00343744	0.0104687	0.742645	0.696185	0.114026	1.02499e-09	-0.00493754	0.015059	0.743002	0.677916	20	cis	No
ENSG00000226419	1	SLC16A1-AS1	113499037	rs56019044	1	113530578	T	C	0.770308	0.00867431	0.00895531	0.332734	-0.356291	0.0804115	9.386348e-06	-0.0243461	0.0257284	0.344008	0.85613	8	cis	No
ENSG00000232499	1	LOC100421402	113992322	rs12727968	1	113452284	G	T	0.861228	-0.000735515	0.0104865	0.944083	0.515072	0.121875	2.376472e-05	-0.00142798	0.0203621	0.944091	0.989074	16	cis	No
ENSG00000243970	1	PPIEL	39997510	rs148588695	1	39852467	G	A	0.955999	-0.0145815	0.0181143	0.420838	-1.21517	0.115221	5.27439e-26	0.0119996	0.0149502	0.422185	0.0170138	20	cis	No
ENSG00000050628	1	PTGER3	71318036	rs1995301	1	70991829	A	G	0.587652	-0.0365895	0.007003	1.74317e-07	0.373689	0.089474	2.960162e-05	-0.0979143	0.0300136	0.00110501	0.0231824	9	cis	No
ENSG00000271992	1	ENSG00000271992	70910754	rs55932687	1	70916701	G	T	0.375934	0.00825872	0.00674987	0.221127	0.432904	0.0926835	3.000587e-06	0.0190775	0.0161182	0.236571	0.471245	20	cis	No
ENSG00000135775	1	COG2	230778235	rs1887491	1	230779975	G	C	0.751401	-0.00586611	0.00731978	0.422897	0.659792	0.0628781	9.284395e-26	-0.00889085	0.0111264	0.424245	0.455485	20	cis	No
ENSG00000177614	1	PGBD5	230457392	rs886982	1	230715703	C	T	0.830882	0.00448105	0.00951569	0.637704	0.650931	0.0649008	1.129406e-23	0.00688406	0.0146347	0.638074	0.759868	20	cis	No
ENSG00000179051	1	RCC2	17733256	rs11203388	1	17765756	C	T	0.721405	0.0185833	0.00704445	0.00833965	0.495231	0.0623454	1.968072e-15	0.0375245	0.0149885	0.0122953	0.693819	20	cis	No
ENSG00000116984	1	MTR	236958610	rs883396	1	236996390	G	A	0.639239	0.00690324	0.00680354	0.310271	0.417388	0.0579407	5.859414e-13	0.0165391	0.0164612	0.315024	0.13134	20	cis	No
ENSG00000122417	1	ODF2L	86814344	rs1830675	1	86810693	T	C	0.643207	-0.00318004	0.00665011	0.632513	-0.504841	0.0719119	2.214384e-12	0.00629909	0.0132032	0.633299	0.913613	20	cis	No
ENSG00000126106	1	TMEM53	45100910	rs77778246	1	45100927	T	C	0.688959	-0.0110143	0.00788117	0.162249	-0.519539	0.0959278	6.096752e-08	0.0212001	0.0156664	0.175986	0.409304	17	cis	No
ENSG00000162692	1	VCAM1	101185298	rs74529441	1	102037018	C	G	0.842787	0.00637001	0.00865703	0.461841	-0.510529	0.124256	3.978992e-05	-0.0124773	0.0172268	0.468884	0.530759	10	cis	No
ENSG00000170989	1	S1PR1	101702444	rs79800449	1	101980792	G	A	0.980976	0.0143005	0.026118	0.584013	-1.03702	0.263944	8.531946e-05	-0.01379	0.025429	0.587616	0.754276	6	cis	No
ENSG00000163867	1	ZMYM6	35449523	rs145488947	1	36369929	A	G	0.980859	0.0525594	0.0270931	0.0523856	-1.25067	0.279148	7.453296e-06	-0.042025	0.0236064	0.0750373	0.868404	6	cis	No
ENSG00000047410	1	TPR	186280784	rs61829929	1	185936872	G	A	0.93289	0.00549085	0.0145053	0.705029	0.762792	0.178553	1.936572e-05	0.00719836	0.0190906	0.706126	0.808559	4	cis	No
ENSG00000189280	1	GJB5	35220648	rs2093185	1	35224312	T	G	0.609127	-0.0108092	0.00666412	0.104803	0.578836	0.0519418	7.664808e-29	-0.018674	0.0116343	0.108475	0.065246	15	cis	No
ENSG00000146463	1	ZMYM4	35734568	rs147890638	1	35442633	C	A	0.979692	-0.0222994	0.026912	0.407327	-1.01806	0.264148	0.000116142	0.0219038	0.0270386	0.417886	NA	NA	cis	No
ENSG00000142621	1	FHAD1	15573768	rs1104688	1	15579802	C	T	0.394258	-0.00366713	0.00743725	0.621958	0.957964	0.0439394	2.224706e-105	-0.00382805	0.00776559	0.622048	0.644735	20	cis	No
ENSG00000116299	1	ELAPOR1	109656301	rs2477363	1	109728977	A	G	0.131769	-0.0293138	0.0107658	0.00647187	0.599935	0.0794144	4.205224e-14	-0.0488616	0.019075	0.0104204	0.088098	16	cis	No
ENSG00000143126	1	CELSR2	109792641	rs579947	1	109783648	T	C	0.454715	-0.00300466	0.00644623	0.641136	-0.388612	0.0558693	3.507213e-12	0.00773177	0.016625	0.641883	0.469666	20	cis	No
ENSG00000163374	1	YY1AP1	155629237	rs76644993	1	155882417	G	A	0.980859	-0.00963938	0.0303215	0.750556	-1.33458	0.253153	1.35069e-07	0.00722278	0.0227612	0.750994	0.781736	3	cis	No
ENSG00000185495	1	ENSG00000185495	224183659	rs4233238	1	224179439	G	T	0.378618	-0.00809032	0.00805138	0.314975	-0.732507	0.0504529	9.233689e-48	0.0110447	0.0110178	0.316132	0.487113	20	cis	No
ENSG00000272645	1	ENSG00000272645	224139096	rs10916081	1	224166332	G	A	0.413519	-0.00764148	0.00806756	0.343544	0.694296	0.0513084	1.014836e-41	-0.0110061	0.0116482	0.344723	0.30493	20	cis	No
ENSG00000230124	1	ACBD6	180238788	rs4652504	1	180425144	G	A	0.177638	-0.015144	0.00773953	0.050382	0.547882	0.110159	6.574188e-07	-0.027641	0.0151802	0.0686285	0.826083	20	cis	No
ENSG00000143171	1	RXRG	165370159	rs111786568	1	165384667	T	A	0.943511	-0.00528975	0.0181941	0.771251	0.802472	0.205732	9.596865e-05	-0.00659182	0.0227355	0.771865	NA	NA	cis	No
ENSG00000233217	1	MROH3P	200890122	rs28684993	1	200876628	A	T	0.879435	0.000579321	0.0102025	0.954719	0.536901	0.0816069	4.732739e-11	0.00107901	0.0190033	0.95472	0.113569	20	cis	No
ENSG00000188643	1	S100A16	153579362	rs28754733	1	153598094	T	C	0.530112	0.0085983	0.00655866	0.189863	-0.312488	0.072052	1.444532e-05	-0.0275156	0.0219265	0.209513	0.860989	4	cis	No
ENSG00000235545	1	ENSG00000235545	63154153	rs2182868	1	63180036	G	C	0.868787	-0.020955	0.0105715	0.0474552	0.416169	0.118521	0.00044583	-0.0503521	0.02917	0.0843182	NA	NA	cis	No
ENSG00000162601	1	MYSM1	59120411	rs11582157	1	59177924	A	G	0.877684	0.000765806	0.0100233	0.939099	0.438349	0.0887486	7.843477e-07	0.00174702	0.0228688	0.939106	0.556756	13	cis	No
ENSG00000127472	1	PLA2G5	20354672	rs10799608	1	20379236	T	C	0.90056	0.00519954	0.011133	0.640472	-0.70477	0.124275	1.419117e-08	-0.00737764	0.0158501	0.6416	0.501175	10	cis	No
ENSG00000127483	1	HP1BP3	21069154	rs7515590	1	21216664	T	C	0.398343	-0.00078126	0.0068214	0.908817	-0.244129	0.073894	0.000953937	0.00320019	0.0279586	0.908872	NA	NA	cis	No
ENSG00000244038	1	DDOST	20978270	rs1108975	1	20248361	T	G	0.883754	0.0133943	0.0096375	0.164588	0.599533	0.152685	8.615486e-05	0.0223412	0.0170522	0.19014	0.0878022	3	cis	No
ENSG00000203865	1	ATP1A1-AS1	116934869	rs850617	1	116906839	G	A	0.406979	0.00778835	0.00763904	0.307944	-0.390497	0.089252	1.21312e-05	-0.0199447	0.0200865	0.320738	0.947542	4	cis	No
ENSG00000187513	1	GJA4	35258599	rs6697367	1	35253844	C	T	0.676938	-0.00472715	0.00695078	0.496448	0.315512	0.0760518	3.344457e-05	-0.0149825	0.0223242	0.502137	0.36176	4	cis	No
ENSG00000054282	1	SDCCAG8	243419320	rs6429422	1	243472801	T	G	0.674837	0.0181225	0.00706893	0.0103568	0.617602	0.0538982	2.127626e-30	0.0293433	0.0117287	0.0123553	0.46053	20	cis	No
ENSG00000116903	1	EXOC8	231468480	rs4846949	1	230495454	G	A	0.680556	-0.00451876	0.00693358	0.514581	-0.384734	0.108372	0.000385069	0.0117452	0.0183229	0.521517	NA	NA	cis	No
ENSG00000143847	1	PPFIA4	202995626	rs782807	1	203007612	G	T	0.795285	0.0049816	0.00781612	0.523897	-0.595996	0.0866809	6.16666e-12	-0.00835845	0.0131706	0.525671	0.452624	16	cis	No
ENSG00000143228	1	NUF2	163236366	rs12144254	1	163313810	T	C	0.701097	0.00871568	0.00687516	0.204903	-0.342118	0.0619941	3.417891e-08	-0.0254757	0.0206193	0.216635	0.897863	12	cis	No
ENSG00000123684	1	LPGAT1	211916799	rs4245744	1	211914682	C	T	0.0392157	-0.00656776	0.0202173	0.745289	-0.879576	0.165915	1.14941e-07	0.00746696	0.0230284	0.745749	0.74042	10	cis	No
ENSG00000153207	1	AHCTF1	247002400	rs12121733	1	247029212	G	C	0.903595	-0.0138412	0.0127279	0.276829	0.305895	0.0787306	0.000102187	-0.0452482	0.0432078	0.294996	0.533257	5	cis	No
ENSG00000236423	1	LINC01134	3816936	rs12097125	1	3817605	C	T	0.825864	-0.00125332	0.00977601	0.897988	-0.459316	0.0715919	1.401279e-10	0.00272867	0.0212881	0.898008	0.972077	18	cis	No
ENSG00000231064	1	ENSG00000231064	155166659	rs6426915	1	154729627	C	G	0.720355	-0.00353798	0.00788251	0.653547	0.225126	0.0612228	0.000235845	-0.0157156	0.0352736	0.655935	NA	NA	cis	No
ENSG00000237624	1	OXCT2P1	39980628	rs3916164	1	40069939	G	A	0.700514	-0.000666318	0.0074376	0.928615	0.675466	0.0560419	1.873052e-33	-0.000986457	0.0110114	0.928617	0.0557187	20	cis	No
ENSG00000123472	1	ATPAF1	47098409	rs3737731	1	47182206	C	T	0.74113	-0.000696344	0.00715246	0.922443	-0.657583	0.0965018	9.478842e-12	0.00105894	0.010878	0.922451	0.538959	19	cis	No
ENSG00000142961	1	MOB3C	47073387	rs7552833	1	47083025	A	C	0.742297	0.000294962	0.0073756	0.9681	-0.48947	0.0634846	1.257643e-14	-0.000602615	0.0150687	0.9681	0.100067	20	cis	No
ENSG00000159658	1	EFCAB14	47124366	rs7532601	1	47169913	C	G	0.737162	0.00159465	0.00726475	0.826256	-0.767796	0.0911889	3.769955e-17	-0.00207692	0.00946504	0.826315	0.162142	20	cis	No
ENSG00000117385	1	P3H1	43212006	rs55817127	1	43247903	A	G	0.769608	-0.00959579	0.0074049	0.19502	0.374549	0.0709769	1.31276e-07	-0.0256196	0.0203576	0.208218	0.216693	8	cis	No
ENSG00000168389	1	MFSD2A	40420802	rs3131706	1	40413098	T	C	0.429038	0.0162029	0.00739413	0.0284284	-0.528506	0.0537082	7.546474e-23	-0.0306579	0.0143333	0.0324416	0.749591	20	cis	No
ENSG00000075391	1	RASAL2	178062864	rs76265389	1	178535799	C	T	0.930089	0.000578599	0.0133464	0.965421	0.952994	0.188234	4.130874e-07	0.000607138	0.0140052	0.965422	0.544701	8	cis	No
ENSG00000169905	1	TOR1AIP2	179809102	rs151330441	1	180117314	G	T	0.986111	-0.0344566	0.0338263	0.308377	-1.31327	0.342541	0.000126123	0.0262373	0.0266509	0.324881	NA	NA	cis	No
ENSG00000092621	1	PHGDH	120202421	rs346669	1	120128447	T	A	0.5426	0.00894282	0.00677238	0.186673	-0.37122	0.0965772	0.000121162	-0.0240904	0.0192901	0.211722	0.22023	5	cis	No
ENSG00000203857	1	HSD3B1	120049821	rs78799355	1	120148875	C	T	0.914216	-0.0281427	0.0133172	0.0345783	-0.805682	0.170957	2.443729e-06	0.0349303	0.0181148	0.0538214	0.216251	6	cis	No
ENSG00000018625	1	ATP1A2	160085549	rs3747625	1	160113371	T	A	0.772526	-0.00677818	0.00783046	0.386701	0.35744	0.0853837	2.835641e-05	-0.0189631	0.0223705	0.396613	0.467976	5	cis	No
ENSG00000162511	1	LAPTM5	31205316	rs10914190	1	31209796	T	C	0.534197	-0.00717194	0.00677092	0.289497	0.425241	0.0935494	5.477137e-06	-0.0168656	0.0163491	0.302264	0.556206	8	cis	No
ENSG00000157193	1	LRP8	53711217	rs6691468	1	53791998	C	G	0.872432	0.00146079	0.00917549	0.873507	0.398523	0.0964501	3.597618e-05	0.00366551	0.0230408	0.8736	NA	NA	cis	No
ENSG00000232453	1	LINC02777	59348540	rs3015311	1	59362218	C	G	0.530696	-0.00255975	0.00643763	0.690908	0.437906	0.0546151	1.074519e-15	-0.00584543	0.014719	0.691268	0.394568	13	cis	No
ENSG00000036549	1	ZZZ3	78028101	rs75136187	1	78489350	T	G	0.970355	0.00903782	0.0222843	0.68506	0.768086	0.197127	9.763114e-05	0.0117667	0.0291695	0.686662	NA	NA	cis	No
ENSG00000143387	1	CTSK	150768684	rs12042263	1	150914838	G	A	0.923786	0.00667015	0.0100709	0.507768	-0.875937	0.174025	4.818713e-07	-0.00761487	0.0115964	0.5114	0.636918	8	cis	No
ENSG00000223861	1	RPS10P6	151529922	rs191475587	1	151183113	T	A	0.987045	0.0331297	0.0337761	0.326661	1.28519	0.326882	8.435903e-05	0.0257781	0.0270865	0.341253	NA	NA	cis	No
ENSG00000204219	1	TCEA3	23707554	rs2298632	1	23710475	C	T	0.503151	0.00251003	0.00668693	0.70739	-0.980895	0.0638164	2.578265e-53	-0.00255892	0.0068192	0.707473	0.131515	20	cis	No
ENSG00000116205	1	TCEANC2	54519260	rs7524477	1	54562444	A	G	0.973273	-0.00853089	0.0128256	0.505957	0.762205	0.114161	2.445977e-11	-0.0111924	0.0169103	0.508055	0.99515	13	cis	No
ENSG00000157216	1	SSBP3	54691105	rs6679166	1	54887991	G	A	0.602358	-0.00172897	0.00684945	0.800713	-0.48523	0.0957743	4.054341e-07	0.0035632	0.0141334	0.800955	0.389585	20	cis	No
ENSG00000184313	1	MROH7	55107463	rs1655534	1	55066759	T	C	0.487979	0.018272	0.00684342	0.00758486	0.780299	0.0461712	4.488456e-64	0.0234167	0.00887903	0.0083569	0.0439104	20	cis	No
ENSG00000143110	1	C1orf162	112016414	rs3008527	1	112523095	T	C	0.730159	0.000328296	0.00744265	0.964817	0.441759	0.112467	8.569671e-05	0.000743156	0.0168488	0.964819	0.644168	6	cis	No
ENSG00000162367	1	TAL1	47681962	rs11211480	1	47693220	A	G	0.452148	0.00889641	0.00741006	0.229912	-0.401874	0.067658	2.853964e-09	-0.0221373	0.0188117	0.23928	0.995969	15	cis	No
ENSG00000231999	1	LRRC8C-DT	90048800	rs2704000	1	90540264	T	C	0.489379	-0.0029928	0.00655543	0.648003	0.400987	0.08682	3.86333e-06	-0.00746358	0.0164279	0.649596	0.219256	9	cis	No
ENSG00000090104	1	RGS1	192544857	rs76258173	1	192407395	G	A	0.983077	-0.0183914	0.0359029	0.608474	-0.855515	0.187436	5.011413e-06	0.0214975	0.0422299	0.610712	0.724415	3	cis	No
ENSG00000233593	1	LINC02609	91248543	rs12128971	1	91503014	A	G	0.537348	0.00546094	0.00681998	0.42329	0.2234	0.0561767	6.986709e-05	0.0244447	0.0311408	0.43247	0.881133	6	cis	No
ENSG00000154429	1	CCSAP	229456758	rs237813	1	229443141	C	T	0.301704	-0.00203898	0.00680913	0.764598	-0.426276	0.0609273	2.624852e-12	0.00478324	0.0159881	0.764807	0.278319	13	cis	No
ENSG00000023909	1	GCLM	94350761	rs7533596	1	94348129	G	A	0.653711	-0.00161638	0.00693917	0.815812	-0.279871	0.0563418	6.786456e-07	0.00577545	0.0248214	0.81601	0.359843	6	cis	No
ENSG00000143514	1	TP53BP2	223967601	rs12046297	1	224043982	T	C	0.906162	-0.0248896	0.011101	0.0249547	-0.745446	0.16442	5.793413e-06	0.0333889	0.0166132	0.0444549	0.0286169	13	cis	No
ENSG00000197323	1	TRIM33	114935399	rs9429544	1	114932865	G	C	0.754318	-0.00355084	0.00830593	0.66901	0.445	0.114097	9.61204e-05	-0.00797942	0.0187768	0.670865	NA	NA	cis	No
ENSG00000064703	1	DDX20	112297867	rs191803	1	112300120	G	C	0.886088	0.0216457	0.0113924	0.0574317	0.698477	0.0811	7.146167e-18	0.0309899	0.0167025	0.0635393	0.485074	20	cis	No
ENSG00000197785	1	ATAD3A	1447531	rs2015387	1	1455318	T	C	0.72167	-0.00175717	0.00958649	0.854565	-0.440261	0.0664248	3.403602e-11	0.0039912	0.0217829	0.85462	0.212282	17	cis	No
ENSG00000215915	1	ATAD3C	1385069	rs4590	1	1375810	C	G	0.797502	0.0195544	0.0100314	0.0512575	-0.59815	0.0751926	1.792754e-15	-0.0326915	0.0172669	0.0583175	0.226	20	cis	No
ENSG00000272455	1	ENSG00000272455	1344476	rs28418680	1	1343666	G	A	0.924136	0.0353052	0.0116938	0.002535	-0.780296	0.0910557	1.03992e-17	-0.0452459	0.0158893	0.00440533	0.523722	20	cis	No
ENSG00000149527	1	PLCH2	2357419	rs12746918	1	2347466	C	T	0.803221	-0.0208076	0.00870042	0.0167769	0.671227	0.0667075	8.113058e-24	-0.0309993	0.013323	0.0199788	0.641968	17	cis	No
ENSG00000160075	1	SSU72	1477053	rs7550471	1	1503928	G	A	0.689542	0.000784877	0.00763808	0.918155	0.43521	0.0691377	3.077378e-10	0.00180344	0.0175527	0.918166	0.0906914	20	cis	No
ENSG00000162654	1	GBP4	89646831	rs359925	1	89996336	G	A	0.480042	0.00789745	0.00660036	0.231494	-0.366912	0.0921052	6.78743e-05	-0.0215241	0.0187829	0.251819	0.926349	9	cis	No
ENSG00000236809	1	SNX25P1	211590367	rs57986933	1	211635721	G	A	0.885854	-0.00573803	0.00931822	0.538036	0.414269	0.0862061	1.54314e-06	-0.013851	0.0226771	0.541337	0.792452	20	cis	No
ENSG00000227243	1	ENSG00000227243	162415339	rs4656368	1	162390204	C	T	0.692577	-0.00944215	0.0072186	0.190862	0.708693	0.0571434	2.548808e-35	-0.0133233	0.0102423	0.193322	0.699575	20	cis	No
ENSG00000143198	1	MGST3	165600098	rs10800118	1	165599774	G	C	0.544732	0.0102013	0.00667409	0.12639	-0.634695	0.051795	1.59962e-34	-0.0160728	0.0105969	0.129332	0.485013	14	cis	No
ENSG00000231789	1	PIK3CD-AS2	9732484	rs2871656	1	9337117	C	T	0.700514	0.0217638	0.00780655	0.0053053	0.238727	0.0621339	0.000121966	0.0911661	0.0404024	0.0240423	NA	NA	cis	No
ENSG00000143157	1	POGK	166808681	rs56229522	1	166816108	T	A	0.779645	0.00107839	0.00751723	0.88593	0.400941	0.081778	9.448105e-07	0.00268965	0.018757	0.885979	0.639463	20	cis	No
ENSG00000168275	1	COA6	234509202	rs10910420	1	234509259	G	C	0.5007	0.00353312	0.00646427	0.58468	0.726786	0.0474859	7.046654e-53	0.00486129	0.00889999	0.584919	0.456993	20	cis	No
ENSG00000200087	1	SNORA73B	28835071	rs76374777	1	28768043	G	C	0.984127	-0.051171	0.0317934	0.107511	-1.2717	0.222241	1.051739e-08	0.0402383	0.0259708	0.121294	0.0218527	8	cis	No
ENSG00000142864	1	SERBP1	67873493	rs2096016	1	67933748	T	C	0.254669	-0.00772922	0.00727735	0.288194	-0.289867	0.0750077	0.000111318	0.0266647	0.0260367	0.305779	0.498322	6	cis	No
ENSG00000162817	1	C1orf115	220863187	rs7555109	1	220867146	T	C	0.7919	-0.00749844	0.007286	0.303406	-0.577018	0.0674882	1.231808e-17	0.0129952	0.0127181	0.306884	0.028562	20	cis	No
ENSG00000160753	1	RUSC1	155290687	rs114272540	1	154912544	C	T	0.973039	0.00506201	0.0221274	0.819051	0.815027	0.20278	5.838102e-05	0.00621085	0.0271932	0.819338	NA	NA	cis	No
ENSG00000117114	1	ADGRL2	81771845	rs10159331	1	82291272	T	C	0.392274	-0.00686767	0.00667872	0.303812	-0.595624	0.0897667	3.239686e-11	0.0115302	0.0113468	0.309553	0.14246	16	cis	No
ENSG00000054277	1	OPN3	241753404	rs671989	1	241776399	A	G	0.501517	0.0214329	0.00681982	0.00167374	-0.463829	0.0872601	1.06379e-07	-0.0462086	0.017081	0.00682489	0.175925	8	cis	No
ENSG00000168679	1	SLC16A4	110905470	rs7526738	1	110937780	G	A	0.421685	-0.00195317	0.0066251	0.768137	-0.431192	0.0573537	5.557156e-14	0.0045297	0.0153764	0.768309	0.663517	20	cis	No
ENSG00000224699	1	ENSG00000224699	110925441	rs79423318	1	110892461	A	G	0.913749	-0.0321791	0.0137527	0.0192921	0.973127	0.139569	3.116474e-12	-0.0330677	0.014907	0.026537	0.250453	7	cis	No
ENSG00000273373	1	ENSG00000273373	110912776	rs79423318	1	110892461	A	G	0.913749	-0.0321791	0.0137527	0.0192921	0.708319	0.0942568	5.700578e-14	-0.0454302	0.0203354	0.0254798	0.107842	16	cis	No
ENSG00000131781	1	FMO5	146646930	rs146406618	1	146670298	C	T	0.719304	0.0023073	0.00795709	0.771841	0.420202	0.0953794	1.054991e-05	0.00549093	0.0189773	0.77232	0.164006	15	cis	No
ENSG00000180867	1	ENSG00000180867	146649692	rs2353987	1	146827556	G	T	0.754435	-0.0162296	0.0081574	0.0466401	0.546122	0.0628966	3.8597e-18	-0.0297179	0.0153241	0.0524652	0.0789894	20	cis	No
ENSG00000237188	1	ENSG00000237188	146644350	rs2353987	1	146827556	G	T	0.754435	-0.0162296	0.0081574	0.0466401	0.36271	0.0656696	3.327717e-08	-0.0447454	0.0239048	0.0612315	0.148789	20	cis	No
ENSG00000130695	1	CEP85	26560691	rs11247878	1	26560962	C	T	0.890756	0.0179043	0.0116204	0.123376	-0.714226	0.086082	1.067311e-16	-0.0250681	0.0165481	0.129806	0.144419	15	cis	No
ENSG00000142669	1	SH3BGRL3	26605667	rs111486799	1	26577985	G	A	0.801937	0.00639845	0.00911267	0.482587	-0.589329	0.0677289	3.281208e-18	-0.0108572	0.0155131	0.484006	0.312051	20	cis	No
ENSG00000142675	1	CNKSR1	26503894	rs2490273	1	26489758	G	T	0.239613	-0.0147688	0.00859848	0.0858687	0.457314	0.0659698	4.144323e-12	-0.0322947	0.0193707	0.0954762	0.258875	20	cis	No
ENSG00000158062	1	UBXN11	26607819	rs7541333	1	26622889	G	A	0.242647	-0.00202733	0.00713971	0.776448	0.450961	0.105979	2.088662e-05	-0.00449558	0.0158674	0.776931	0.580129	4	cis	No
ENSG00000117280	1	RAB29	205737114	rs708723	1	205739266	C	T	0.450747	-0.023252	0.00639051	0.000274218	0.8124	0.0470606	8.959091e-67	-0.0286214	0.00803904	0.000370436	0.977449	20	cis	No
ENSG00000121931	1	LRIF1	111489807	rs72990660	1	111472799	C	T	0.743581	-0.000190767	0.0081622	0.981354	0.325004	0.0663277	9.585085e-07	-0.000586968	0.0251144	0.981354	NA	NA	cis	No
ENSG00000162623	1	TYW3	75198836	rs6681874	1	75264362	A	G	0.884104	-0.0152085	0.00904627	0.092726	-0.559139	0.0746909	7.098278e-14	0.0271999	0.0165819	0.100936	0.793737	20	cis	No
ENSG00000177173	1	ENSG00000177173	117075558	rs2300746	1	117082183	C	G	0.889472	0.00101557	0.00885202	0.908661	-0.498143	0.0914093	5.048656e-08	-0.00203871	0.017774	0.908681	0.822747	5	cis	No
ENSG00000004487	1	KDM1A	23345941	rs113560304	1	23327279	A	G	0.986578	0.040526	0.0328768	0.217702	-1.25325	0.207951	1.673939e-09	-0.0323367	0.0267763	0.227178	0.172119	16	cis	No
ENSG00000162552	1	WNT4	22443798	rs7524102	1	22698447	A	G	0.82423	-0.0653398	0.00838842	6.73897e-15	0.423409	0.0684598	6.218734e-10	-0.154318	0.0318601	1.274936e-06	0.0135803	13	cis	No
ENSG00000227533	1	SLC2A1-AS1	43424720	rs900835	1	43412455	C	T	0.827848	-0.000828197	0.00827296	0.920258	1.23189	0.055689	1.989467e-108	-0.000672298	0.00671573	0.920259	0.542014	20	cis	No
ENSG00000122223	1	CD244	160799950	rs3766378	1	160807409	A	G	0.193161	-0.00037102	0.00763235	0.961229	-0.295713	0.0669861	1.012239e-05	0.00125466	0.0258116	0.961231	NA	NA	cis	No
ENSG00000132704	1	FCRL2	157715523	rs61691958	1	157740789	G	C	0.828898	-0.0146393	0.00839366	0.0811423	0.674967	0.0733166	3.378887e-20	-0.0216889	0.0126569	0.0866003	0.544404	20	cis	No
ENSG00000237457	1	ENSG00000237457	190447681	rs72733082	1	190558256	G	C	0.802988	-0.00663189	0.00758175	0.381727	-0.418124	0.0714009	4.741397e-09	0.0158611	0.018334	0.386973	0.51473	20	cis	No
ENSG00000162595	1	DIRAS3	68511645	rs2820478	1	68590852	A	G	0.31781	0.00478438	0.0067838	0.480645	-0.30958	0.059145	1.656509e-07	-0.0154544	0.0221109	0.484584	0.942968	14	cis	No
ENSG00000143801	1	PSEN2	227057885	rs6689397	1	226987975	C	A	0.729108	0.00445578	0.0072008	0.536055	-0.281552	0.0644995	1.270172e-05	-0.0158258	0.0258311	0.540098	0.193316	5	cis	No
ENSG00000069702	1	TGFBR3	92145902	rs1766164	1	91315863	T	A	0.49253	-0.00263418	0.00665113	0.692068	0.290872	0.0727784	6.423676e-05	-0.00905615	0.0229782	0.693493	0.555035	6	cis	No
ENSG00000117305	1	HMGCL	24128375	rs571479	1	24053465	A	T	0.677171	0.011277	0.00694152	0.104254	-0.391932	0.0969979	5.330891e-05	-0.0287728	0.0190889	0.131733	0.392054	3	cis	No
ENSG00000188822	1	CNR2	24197016	rs140569782	1	24095576	T	C	0.984827	-0.00242816	0.0383159	0.94947	-1.04952	0.262373	6.331561e-05	0.00231359	0.0365126	0.949476	NA	NA	cis	No
ENSG00000236810	1	ELOA-AS1	24086872	rs7514394	1	24100223	C	T	0.421452	0.000270055	0.00646589	0.966685	0.317384	0.0750522	2.348949e-05	0.000850878	0.0203734	0.966687	0.699656	10	cis	No
ENSG00000162396	1	PARS2	55222571	rs2764823	1	55222130	C	T	0.43219	-0.0148144	0.00729598	0.0423065	-0.413951	0.057402	5.536372e-13	0.0357878	0.0183106	0.0506432	0.0969849	11	cis	No
ENSG00000116191	1	RALGPS2	178694300	rs12738332	1	178991887	G	A	0.94071	-0.0387279	0.0148766	0.0092338	0.455395	0.125254	0.000277164	-0.0850424	0.0401781	0.0342908	0.11615	3	cis	No
ENSG00000116161	1	CACYBP	174968300	rs859396	1	175461028	G	A	0.954832	0.017281	0.016097	0.283021	0.443362	0.11888	0.000191873	0.0389772	0.0377809	0.30223	NA	NA	cis	No
ENSG00000055732	1	MCOLN3	85483765	rs12755226	1	85519418	T	C	0.734711	0.0106568	0.00762945	0.162472	-0.557211	0.0622546	3.538252e-19	-0.0191253	0.0138579	0.167558	0.482917	20	cis	No
ENSG00000035687	1	ADSS2	244571796	rs73120328	1	243615247	A	G	0.986461	-0.0750601	0.0309236	0.0152127	1.02026	0.272459	0.000180651	-0.0735696	0.03612	0.0416693	NA	NA	cis	No
ENSG00000260805	1	ENSG00000260805	212731175	rs76858369	1	212674885	C	T	0.903711	-0.00537487	0.0122335	0.660404	0.895036	0.118016	3.349683e-14	-0.0060052	0.0136911	0.660936	0.186497	20	cis	No
ENSG00000143183	1	TMCO1	165696032	rs4656471	1	165962772	A	C	0.662698	0.00795897	0.00738734	0.281311	0.331778	0.0768038	1.56161e-05	0.0239888	0.022948	0.295857	0.747628	12	cis	No
ENSG00000143816	1	WNT9A	228106357	rs114794852	1	227952687	G	C	0.968954	0.0076211	0.0225491	0.735379	-0.892886	0.241096	0.000212696	-0.00853536	0.0253591	0.736434	0.52408	7	cis	No
ENSG00000183682	1	BMP8A	39957318	rs6698781	1	39934713	A	G	0.0902194	0.0118207	0.01079	0.273287	-0.607962	0.0834661	3.242134e-13	-0.0194432	0.0179474	0.278658	0.570683	20	cis	No
ENSG00000143643	1	TTC13	231041989	rs11122177	1	231118857	C	T	0.669351	-0.00671646	0.00666869	0.313856	-0.627082	0.0520998	2.293418e-33	0.0107107	0.0106716	0.315545	0.0926519	20	cis	No
ENSG00000235434	1	ENSG00000235434	20140860	rs10737483	1	20174139	G	T	0.570028	0.00686706	0.00650214	0.290911	0.250023	0.072904	0.000604729	0.0274657	0.0272114	0.312809	NA	NA	cis	No
ENSG00000213281	1	NRAS	115247090	rs112192457	1	115675126	C	T	0.94923	-0.0298442	0.0174917	0.087973	0.5706	0.139671	4.401564e-05	-0.0523032	0.033221	0.115394	NA	NA	cis	No
ENSG00000143256	1	PFDN2	161070346	rs144085084	1	160502028	G	A	0.978525	0.0114021	0.0160495	0.477437	-0.929506	0.252838	0.000236644	-0.0122668	0.0175862	0.485472	0.108536	5	cis	No
ENSG00000158796	1	DEDD	161090764	rs115742773	1	160842499	G	C	0.986695	-0.0088208	0.0350257	0.801166	-1.0846	0.297348	0.000264723	0.00813277	0.0323705	0.801629	NA	NA	cis	No
ENSG00000158864	1	NDUFS2	161166894	rs4379692	1	161186313	C	T	0.688492	0.0117424	0.00685689	0.0868052	-0.376825	0.0628643	2.044145e-09	-0.0311614	0.0189245	0.0996367	0.513658	18	cis	No
ENSG00000186094	1	AGBL4	48998527	rs74879015	1	50113791	G	C	0.960901	0.0243312	0.0209514	0.245513	0.71852	0.161959	9.145997e-06	0.0338629	0.0301416	0.261241	0.431041	5	cis	No
ENSG00000143376	1	SNX27	151584541	rs6687866	1	151653312	A	C	0.697596	0.0105708	0.00692026	0.126632	0.790591	0.0636898	2.217421e-35	0.0133708	0.0088193	0.129499	0.406102	20	cis	No
ENSG00000143450	1	OAZ3	151735445	rs60360893	1	151704088	G	A	0.884921	0.0223547	0.0112943	0.0477828	-0.390222	0.0816386	1.754068e-06	-0.0572871	0.0313266	0.0674436	0.23823	16	cis	No
ENSG00000182134	1	TDRKH	151742583	rs1623480	1	151746524	C	A	0.485294	-0.0194463	0.00652692	0.00288819	-0.500261	0.0542051	2.73078e-20	0.0388723	0.0137101	0.00457806	0.00687623	20	cis	No
ENSG00000158773	1	USF1	161009041	rs12748157	1	161024822	A	C	0.386141	-0.0179404	0.00709358	0.0114355	0.443787	0.06892	1.201388e-10	-0.0404257	0.0171729	0.0185707	0.979634	19	cis	No
ENSG00000162694	1	EXTL2	101337943	rs56344882	1	101368442	G	C	0.866363	0.000663483	0.0083273	0.936495	-0.484557	0.0842321	8.786088e-09	-0.00136926	0.017187	0.936501	0.40246	10	cis	No
ENSG00000117151	1	CTBS	85015289	rs2911602	1	85070705	A	G	0.96697	-0.0156135	0.0171311	0.362078	1.37781	0.148282	1.516588e-20	-0.0113321	0.0124932	0.364375	0.307871	12	cis	No
ENSG00000204178	1	MACO1	25757388	rs1293261	1	25713234	A	T	0.480275	-0.0020126	0.00706199	0.775651	0.363781	0.0685441	1.11287e-07	-0.00553245	0.0194407	0.775966	0.582345	16	cis	No
ENSG00000230630	1	ENSG00000230630	172109461	rs58679315	1	171996761	G	C	0.985089	0.00728621	0.0204772	0.721975	-0.669161	0.159954	2.871229e-05	-0.0108886	0.0307118	0.722934	NA	NA	cis	No
ENSG00000163568	1	AIM2	159032274	rs76839161	1	159045424	A	C	0.953198	0.00940477	0.0117402	0.423087	-0.733968	0.124757	4.024158e-09	-0.0128136	0.0161431	0.427341	0.502663	8	cis	No
ENSG00000162398	1	LEXM	55271736	rs12136248	1	55302389	G	T	0.861695	0.0376894	0.00931846	5.2414e-05	-0.415849	0.0848739	9.602607e-07	-0.0906324	0.0290569	0.00181381	0.0695486	7	cis	No
ENSG00000137965	1	IFI44	79115481	rs72935635	1	79119062	A	G	0.920868	-0.0199055	0.0111598	0.0744773	-0.68551	0.0885639	9.919213e-15	0.0290375	0.0167062	0.0821886	0.384825	6	cis	No
ENSG00000213085	1	CFAP45	159842154	rs2325700	1	158870203	G	A	0.706759	-0.0187529	0.0116836	0.10848	0.254908	0.0617593	3.668161e-05	-0.0735673	0.0491783	0.134671	NA	NA	cis	No
ENSG00000162852	1	CNST	246729746	rs10924285	1	245819662	T	C	0.387838	-0.00641206	0.00653942	0.326827	-0.266442	0.0725558	0.000240439	0.0240655	0.0254033	0.343468	0.950805	4	cis	No
ENSG00000213171	1	LINGO4	151772740	rs71625138	1	151765695	G	A	0.937208	0.00640766	0.0162078	0.692589	1.0063	0.106622	3.799589e-21	0.00636754	0.0161205	0.692844	0.182533	20	cis	No
ENSG00000158716	1	DUSP23	159750722	rs77681011	1	159465230	A	G	0.916783	0.00871661	0.0104898	0.405997	0.458157	0.128195	0.000351682	0.0190254	0.0235064	0.418302	0.693935	3	cis	No
ENSG00000162618	1	ADGRL4	79355449	rs17102586	1	79453248	G	A	0.958567	-0.0260067	0.0190634	0.172497	0.604749	0.171823	0.000432201	-0.0430041	0.033808	0.203369	NA	NA	cis	No
ENSG00000116652	1	ENSG00000116652	64014588	rs3004318	1	63900739	G	A	0.51774	-0.0113437	0.00645618	0.0789114	-0.402349	0.0934602	1.669611e-05	0.0281937	0.0173312	0.103788	NA	NA	cis	No
ENSG00000143851	1	PTPN7	202116141	rs35587010	1	202131289	G	A	0.82423	0.0108408	0.00826568	0.189675	-0.428511	0.0741448	7.497795e-09	-0.0252988	0.0197798	0.200889	0.442091	7	cis	No
ENSG00000196449	1	YRDC	38268616	rs61770577	1	37420916	C	T	0.955766	-0.0267601	0.0206139	0.194234	0.672098	0.181169	0.000207436	-0.0398158	0.0324946	0.22046	NA	NA	cis	No
ENSG00000143862	1	ARL8A	202102532	rs3934809	1	202112899	C	A	0.422386	-0.0164611	0.00653551	0.0117781	0.312504	0.0593721	1.41351e-07	-0.0526748	0.0231845	0.0230874	0.0697548	5	cis	No
ENSG00000197568	1	HHLA3	70820488	rs71651454	1	70842317	C	T	0.798086	-0.0159942	0.00841234	0.0572662	-0.48769	0.0710801	6.831887e-12	0.0327958	0.0178994	0.0669169	0.180471	20	cis	No
ENSG00000158315	1	RHBDL2	39351479	rs78129797	1	39231967	G	T	0.941527	0.000196651	0.0126514	0.987598	-0.74386	0.204581	0.000276878	-0.000264366	0.0170079	0.987598	NA	NA	cis	No
ENSG00000011021	1	CLCN6	11866207	rs1023252	1	11899033	G	T	0.725257	-0.00816428	0.0074574	0.273609	0.411789	0.0638549	1.127251e-10	-0.0198264	0.0183689	0.280434	0.106262	20	cis	No
ENSG00000162613	1	FUBP1	78409740	rs34517439	1	78450517	C	A	0.874883	-0.0223736	0.012077	0.063944	-0.678	0.0971411	2.961464e-12	0.0329994	0.0184295	0.0733612	0.138578	20	cis	No
ENSG00000162669	1	HFM1	91726323	rs12757326	1	91870130	G	A	0.0781979	0.00631494	0.0119477	0.597119	-1.23714	0.089561	2.116682e-43	-0.00510447	0.00966458	0.597387	0.912202	16	cis	No
ENSG00000136643	1	RPS6KC1	213224589	rs6697921	1	213248758	C	T	0.356443	-0.0174415	0.00658473	0.00807848	0.371714	0.0721952	2.622462e-07	-0.0469218	0.0199212	0.0185044	0.570993	12	cis	No
ENSG00000225265	1	TAF1A-AS1	222763167	rs2936048	1	222774274	G	A	0.856676	-0.0074482	0.00941503	0.428887	-0.99178	0.0793077	6.968186e-36	0.00750993	0.00951204	0.429809	0.047868	20	cis	No
ENSG00000272750	1	ENSG00000272750	222832209	rs2133189	1	222814442	C	T	0.274627	-0.0280082	0.00702092	6.62806e-05	-0.743639	0.0502581	1.545131e-49	0.0376637	0.00977842	0.000117293	0.280251	20	cis	No
ENSG00000143184	1	XCL1	168545711	rs61694963	1	168514410	C	G	0.826447	-0.00729041	0.00939088	0.437555	0.373434	0.0735352	3.808211e-07	-0.0195226	0.0254395	0.442836	0.604083	10	cis	No
ENSG00000152763	1	DNAI4	67278568	rs2985824	1	67410171	A	G	0.262722	-0.0316471	0.00781359	5.11596e-05	0.336209	0.0670331	5.28768e-07	-0.0941292	0.0298718	0.00162655	0.0780058	10	cis	No
ENSG00000117593	1	DARS2	173793641	rs148783362	1	173877862	C	A	0.96592	0.0108195	0.0196691	0.582269	-0.759164	0.197222	0.000118458	-0.0142519	0.0261721	0.586067	0.97006	5	cis	No
ENSG00000272654	1	ENSG00000272654	153950219	rs6587728	1	153064996	C	T	0.943744	-0.020087	0.0105705	0.0573962	0.454274	0.104756	1.447751e-05	-0.0442178	0.0254051	0.0817695	NA	NA	cis	No
ENSG00000134717	1	BTF3L4	52521797	rs3015294	1	52570616	C	A	0.0396825	0.00607754	0.0201031	0.762409	-1.11717	0.21536	2.13188e-07	-0.00544012	0.0180252	0.7628	0.66179	4	cis	No
ENSG00000162761	1	LMX1A	165171104	rs4657411	1	165173549	G	A	0.399393	0.0138624	0.00696837	0.0466652	-0.252134	0.068729	0.000243953	-0.0549803	0.0314396	0.0803323	0.292714	3	cis	No
ENSG00000229228	1	LINC00582	231727038	rs1025526	1	231750641	C	T	0.324697	-0.0126779	0.00713214	0.075475	0.248911	0.0577894	1.653251e-05	-0.0509335	0.0309976	0.100353	0.79421	4	cis	No
ENSG00000092978	1	GPATCH2	217600334	rs11118040	1	218295655	G	A	0.869398	-0.00292607	0.0109709	0.789692	0.522704	0.120616	1.466729e-05	-0.00559795	0.0210285	0.790079	NA	NA	cis	No
ENSG00000162670	1	BRINP3	190066792	rs72733082	1	190558256	G	C	0.802988	-0.00663189	0.00758175	0.381727	-0.686157	0.067891	5.156787e-24	0.00966527	0.0110909	0.383503	0.159515	20	cis	No
ENSG00000186197	1	EDARADD	236511562	rs1252141	1	237151464	C	T	0.844538	-0.0141402	0.00841978	0.0930735	0.386587	0.0927396	3.065829e-05	-0.036577	0.0234809	0.119296	NA	NA	cis	No
ENSG00000198758	1	EPS8L3	110292702	rs6537873	1	110309582	C	T	0.654879	0.00116435	0.0107402	0.91367	0.515127	0.0915751	1.853059e-08	0.00226032	0.0208535	0.913686	0.0814826	7	cis	No
ENSG00000143507	1	DUSP10	221874766	rs7546398	1	221935450	T	C	0.567227	0.0252574	0.00661028	0.000132953	0.338131	0.0939294	0.000318409	0.0746971	0.0285087	0.00878918	NA	NA	cis	No
ENSG00000187608	1	ISG15	948803	rs2465124	1	949235	G	A	0.038282	0.0408755	0.0200532	0.0415147	0.791625	0.112946	2.402479e-12	0.0516349	0.0263812	0.0503168	0.993485	9	cis	No
ENSG00000143164	1	DCAF6	167905021	rs6427069	1	167124834	C	T	0.370798	0.00389959	0.00661358	0.555436	-0.307039	0.093434	0.00101564	-0.0127006	0.0218839	0.561668	NA	NA	cis	No
ENSG00000143384	1	MCL1	150547032	rs7520022	1	150659173	C	G	0.491013	-0.00215041	0.00643796	0.738364	-0.464217	0.0910903	3.464909e-07	0.00463234	0.0138982	0.738904	0.728171	20	cis	No
ENSG00000143418	1	CERS2	150933059	rs11587444	1	150722844	A	G	0.604809	-0.00242676	0.00656752	0.711748	0.302809	0.0568241	9.881859e-08	-0.00801416	0.0217407	0.712408	0.7117	20	cis	No
ENSG00000163156	1	SCNM1	151129140	rs138908374	1	150590978	C	T	0.961018	0.0117105	0.0231766	0.613366	0.852427	0.218188	9.351063e-05	0.0137378	0.0274154	0.616301	0.836136	3	cis	No
ENSG00000122224	1	LY9	160765864	rs2027015	1	160791778	G	A	0.427638	-0.000674309	0.00665399	0.919281	0.26296	0.0555337	2.189001e-06	-0.0025643	0.02531	0.9193	0.892119	15	cis	No
ENSG00000272506	1	ENSG00000272506	65469153	rs77241227	1	65875673	A	T	0.916317	0.0206749	0.0132464	0.118572	-0.724956	0.185002	8.905087e-05	-0.0285188	0.019668	0.147056	NA	NA	cis	No
ENSG00000233730	1	ENSG00000233730	115642293	rs7537971	1	115213826	G	A	0.544818	0.00236998	0.00726449	0.744241	-0.39171	0.0950056	3.739395e-05	-0.00605034	0.0186035	0.745011	0.159984	12	cis	No
ENSG00000142892	1	PIGK	77554675	rs1779188	1	77652789	A	G	0.738095	0.000670219	0.00719917	0.925827	0.340839	0.059006	7.634128e-09	0.00196638	0.0211247	0.925836	0.737179	17	cis	No
ENSG00000156876	1	SASS6	100549119	rs72728119	1	100518832	T	C	0.936041	0.0142579	0.0153558	0.353147	0.685936	0.133246	2.63409e-07	0.0207861	0.0227479	0.360844	0.0269633	8	cis	No
ENSG00000183853	1	KIRREL1	157963063	rs12032505	1	158044482	T	A	0.895775	-0.0099652	0.011976	0.405352	0.579078	0.128643	6.749648e-06	-0.0172087	0.0210315	0.413223	0.06272	5	cis	No
ENSG00000234184	1	LINC01781	81001440	rs72713451	1	81851724	T	G	0.96592	0.00530885	0.0206163	0.796787	-0.845669	0.195101	1.460862e-05	-0.00627769	0.0244217	0.797137	NA	NA	cis	No
ENSG00000143416	1	SELENBP1	151336778	rs61818031	1	151349916	G	C	0.700397	-0.00399168	0.00806789	0.620769	-0.374657	0.0600557	4.418177e-10	0.0106542	0.0216017	0.621862	0.237289	5	cis	No
ENSG00000143434	1	SEMA6C	151104161	rs12089658	1	151117010	G	A	0.919935	0.043811	0.013563	0.00123709	0.658985	0.0860328	1.86375e-14	0.0664825	0.0223369	0.00291701	0.000574781	20	cis	No
ENSG00000117360	1	PRPF3	150293925	rs12022137	1	150138710	G	A	0.859827	-0.00101197	0.011419	0.929383	0.582052	0.146809	7.349237e-05	-0.00173862	0.0196234	0.9294	NA	NA	cis	No
ENSG00000143401	1	ANP32E	150190717	rs4926419	1	150264714	T	C	0.48401	0.0103018	0.00660635	0.118905	0.269128	0.0561077	1.61355e-06	0.0382784	0.0258119	0.13808	0.768417	13	cis	No
ENSG00000143458	1	GABPB2	151043054	rs34061869	1	151043589	G	A	0.927988	0.00789718	0.0144287	0.584156	0.764379	0.1163	4.948941e-11	0.0103315	0.0189417	0.585453	0.127362	15	cis	No
ENSG00000159164	1	SV2A	149874870	rs112851681	1	149889489	A	G	0.924837	0.0435423	0.0140174	0.00189436	-0.950759	0.105779	2.514889e-19	-0.0457974	0.015599	0.00332565	0.0148956	20	cis	No
ENSG00000261716	1	H2BC20P	149816065	rs16833149	1	149991181	G	C	0.912582	0.0475996	0.0129798	0.00024521	-0.50066	0.0966828	2.238259e-07	-0.0950737	0.031768	0.00276475	0.224754	15	cis	No
ENSG00000163141	1	BNIPL	151009046	rs15740	1	151040435	G	A	0.217554	0.0249988	0.00818859	0.0022665	-0.380853	0.0762155	5.821189e-07	-0.065639	0.0251956	0.00918282	0.0361458	17	cis	No
ENSG00000203804	1	ENSG00000203804	150533480	rs4971041	1	150537357	C	T	0.429155	0.00201178	0.00649902	0.756902	-0.232111	0.055318	2.717407e-05	-0.00866732	0.0280757	0.75754	NA	NA	cis	No
ENSG00000143420	1	ENSA	150573327	rs11805308	1	150689215	A	G	0.601657	-0.00757084	0.00984417	0.441853	0.372808	0.0934837	6.664784e-05	-0.0203076	0.026892	0.450156	0.163823	7	cis	No
ENSG00000220323	1	H2BC19P	149814608	rs67567469	1	149818561	G	A	0.957633	0.0433836	0.0184446	0.0186676	0.659302	0.134123	8.848494e-07	0.0658023	0.0310136	0.0338611	0.00495086	5	cis	No
ENSG00000117133	1	RPF1	84944942	rs1533374	1	84970884	T	A	0.359244	-0.00149916	0.00688232	0.827563	0.326911	0.0569843	9.644558e-09	-0.00458584	0.0210678	0.827686	0.83388	20	cis	No
ENSG00000116459	1	ATP5PB	111991486	rs1282275	1	111629571	G	A	0.967437	-0.00395057	0.013448	0.768936	-0.799492	0.170679	2.810729e-06	0.00494135	0.0168537	0.769377	0.55979	6	cis	No
ENSG00000116141	1	MARK1	220701568	rs9430949	1	220768697	C	T	0.692344	-0.00136327	0.00674827	0.839903	-0.396557	0.0588719	1.628902e-11	0.00343777	0.0170248	0.839974	0.617544	20	cis	No
ENSG00000174842	1	GLMN	92711959	rs901917	1	92292407	C	T	0.0890523	0.00867689	0.00913665	0.342275	-0.597763	0.185281	0.00125427	-0.0145156	0.0159332	0.36228	NA	NA	cis	No
ENSG00000162591	1	MEGF6	3406484	rs28447582	1	3448360	G	A	0.515523	0.00972421	0.0069307	0.160598	-0.419316	0.0549379	2.301676e-14	-0.0231906	0.0168055	0.167605	0.0556256	16	cis	No
ENSG00000162419	1	GMEB1	28995244	rs7528665	1	30066112	C	T	0.336251	-0.0123323	0.00669275	0.0653832	-0.3109	0.0725442	1.82195e-05	0.0396665	0.0234324	0.0904933	0.590222	3	cis	No
ENSG00000162777	1	DENND2D	111729796	rs11102218	1	111735181	A	G	0.550303	-0.0245055	0.00658311	0.00019728	-0.408259	0.0546097	7.665078e-14	0.0600244	0.0180132	0.000861482	0.00384507	20	cis	No
ENSG00000163431	1	LMOD1	201865580	rs2644112	1	201806106	T	C	0.674486	0.0363457	0.00731696	6.78815e-07	-0.447141	0.0613036	3.011519e-13	-0.0812847	0.0197982	4.03178e-05	0.0603855	18	cis	No
ENSG00000198892	1	SHISA4	201857808	rs13374557	1	201857560	G	A	0.789099	0.00538213	0.00815874	0.509461	-0.511204	0.0880839	6.490536e-09	-0.0105283	0.0160626	0.512174	0.00146273	18	cis	No
ENSG00000171502	1	COL24A1	86194916	rs80323833	1	86469561	C	T	0.979342	0.0175684	0.0253489	0.488269	-1.64325	0.269332	1.052702e-09	-0.0106913	0.0155253	0.491053	0.804793	20	cis	No
ENSG00000162896	1	PIGR	207101863	rs12121714	1	207135389	C	T	0.734477	-0.00805154	0.00776317	0.299668	-0.334663	0.080116	2.950801e-05	0.0240586	0.0239013	0.314135	NA	NA	cis	No
ENSG00000162897	1	FCAMR	207131310	rs34367837	1	207139980	G	C	0.820845	-0.00857304	0.00804019	0.2863	0.500593	0.0722323	4.198999e-12	-0.0171258	0.0162503	0.291941	0.272012	6	cis	No
ENSG00000169914	1	OTUD3	20209006	rs16823039	1	20184560	T	C	0.883637	0.00456225	0.0108405	0.673863	0.7116	0.0817472	3.179015e-18	0.00641126	0.0152518	0.674222	0.547781	20	cis	No
ENSG00000117245	1	KIF17	20990507	rs12217108	1	21013081	C	T	0.947012	-0.00825369	0.0125783	0.511704	0.759713	0.122887	6.321748e-10	-0.0108642	0.0166496	0.514066	0.430083	12	cis	No
ENSG00000158816	1	VWA5B1	20617412	rs2027880	1	20569923	A	C	0.915266	0.00342408	0.00926188	0.711609	-0.549004	0.0922086	2.617755e-09	-0.00623689	0.0169028	0.712139	0.364111	12	cis	No
ENSG00000171824	1	EXOSC10	11126675	rs72871483	1	11234810	G	A	0.975957	-0.00463051	0.0178527	0.795348	0.84306	0.164622	3.036109e-07	-0.0054925	0.0212032	0.795604	0.711238	16	cis	No
ENSG00000171812	1	COL8A2	36560837	rs10796877	1	36651610	G	A	0.421802	0.00516211	0.00645071	0.423573	0.240828	0.0714357	0.000748264	0.0214348	0.0275298	0.436213	NA	NA	cis	No
ENSG00000242193	1	CRYZL2P	177975271	rs58766730	1	178017308	T	C	0.869281	0.0157308	0.0105982	0.137733	-0.561106	0.0795821	1.780729e-12	-0.0280353	0.0193021	0.146375	0.450828	17	cis	No
ENSG00000234614	1	ENSG00000234614	151814353	rs7536659	1	151816718	T	C	0.694328	-0.0182426	0.00687435	0.00796102	0.350973	0.0747433	2.656761e-06	-0.0519772	0.0224979	0.020871	0.618968	6	cis	No
ENSG00000269489	1	ENSG00000269489	151770530	rs41268482	1	152758656	C	A	0.848389	-0.0164146	0.00825265	0.0467007	-0.340126	0.0886484	0.000124649	0.0482603	0.02733	0.0774235	NA	NA	cis	No
ENSG00000215788	1	TNFRSF25	6521211	rs1536593	1	6525915	T	C	0.93219	0.0269529	0.0154485	0.0810392	-0.689681	0.112318	8.229657e-10	-0.0390802	0.0232861	0.0932955	0.0175099	14	cis	No
ENSG00000134240	1	HMGCS2	120290619	rs12132674	1	120321087	G	A	0.713469	0.00682993	0.0079961	0.393018	-0.728196	0.0550604	6.261011e-40	-0.00937925	0.0110036	0.394002	0.694324	20	cis	No
ENSG00000082512	1	TRAF5	211499957	rs150391933	1	211690688	T	C	0.947246	-0.0156578	0.0139358	0.261198	1.07561	0.206255	1.838629e-07	-0.0145571	0.0132535	0.272046	0.76723	20	cis	No
ENSG00000224261	1	RPSAP18	160236130	rs11265321	1	160073904	G	A	0.581466	0.00900513	0.00668553	0.177993	0.268532	0.0743798	0.000305867	0.0335347	0.0265729	0.206953	NA	NA	cis	No
ENSG00000188807	1	TMEM201	9648932	rs144032901	1	10632872	C	T	0.958333	0.018257	0.0220421	0.407513	-0.735012	0.190593	0.00011505	-0.0248391	0.0306726	0.418049	NA	NA	cis	No
ENSG00000117859	1	OSBPL9	52042851	rs61782554	1	52974465	A	G	0.988912	-0.0600159	0.0333844	0.0722211	1.22331	0.310516	8.161463e-05	-0.0490603	0.0299973	0.101946	0.315748	5	cis	No
ENSG00000126698	1	DNAJC8	28525967	rs157229	1	29227642	T	C	0.681839	0.0139765	0.0146109	0.338777	-0.335817	0.103045	0.00111827	-0.0416194	0.0453441	0.358693	NA	NA	cis	No
ENSG00000232671	1	ZNF687-AS1	151252500	rs11204764	1	151016396	T	C	0.962535	-0.000456757	0.0158113	0.976954	0.933855	0.233471	6.3377e-05	-0.000489109	0.0169317	0.976954	NA	NA	cis	No
ENSG00000116151	1	MORN1	2252692	rs6685453	1	2295938	A	G	0.745527	-0.00816793	0.0149173	0.584003	0.68124	0.0704391	3.991513e-22	-0.0119898	0.0219323	0.584604	0.787916	9	cis	No
ENSG00000162585	1	FAAP20	2115903	rs11587831	1	2110848	T	G	0.762838	0.00531483	0.00913901	0.560867	-0.810922	0.0627531	3.36428e-38	-0.00655406	0.0112813	0.561263	0.900455	15	cis	No
ENSG00000269896	1	LOC100129534	2281853	rs7545940	1	2299627	T	C	0.638772	0.0131143	0.00689443	0.05715	-0.688203	0.0512051	3.518278e-41	-0.0190559	0.0101179	0.0596476	0.574095	20	cis	No
ENSG00000272420	1	ENSG00000272420	2294500	rs7539098	1	2296096	A	T	0.493042	0.0148309	0.0168069	0.377546	0.518742	0.0687903	4.666686e-14	0.0285901	0.0326204	0.380786	0.979797	8	cis	No
ENSG00000162434	1	JAK1	65298912	rs310235	1	65335323	G	A	0.798903	-0.0110706	0.00759426	0.144908	-0.470591	0.0658608	8.984041e-13	0.0235249	0.0164701	0.153195	0.230345	20	cis	No
ENSG00000163154	1	TNFAIP8L2	151129105	rs79671996	1	151562527	G	A	0.985177	0.040007	0.0312487	0.200448	-1.78926	0.427486	2.844929e-05	-0.0223595	0.0182634	0.220845	0.706771	6	cis	No
ENSG00000134262	1	AP4B1	114437370	rs17510162	1	114413731	C	A	0.823413	-0.0143832	0.00828587	0.082587	-0.633152	0.111489	1.354621e-08	0.0227168	0.0136844	0.0969038	0.232148	18	cis	No
ENSG00000154027	1	AK5	77747736	rs113252564	1	77435051	G	A	0.980042	-0.0502499	0.0316584	0.112455	-0.979552	0.285674	0.000605988	0.0512989	0.035614	0.149751	NA	NA	cis	No
ENSG00000162614	1	NEXN	78354198	rs1166703	1	78340039	A	T	0.185458	-0.00692512	0.00811752	0.3936	0.285243	0.0697852	4.361585e-05	-0.024278	0.0290715	0.403655	0.579733	4	cis	No
ENSG00000162616	1	DNAJB4	78444859	rs7537908	1	78518939	A	G	0.792834	0.0134156	0.00748275	0.0729938	0.339136	0.0706955	1.609509e-06	0.0395582	0.0235548	0.0930716	0.988265	16	cis	No
ENSG00000134371	1	CDC73	193091147	rs560900	1	193282883	C	T	0.726891	-0.00652081	0.00705206	0.355139	-0.265328	0.0644482	3.839693e-05	0.0245764	0.0272408	0.366955	NA	NA	cis	No
ENSG00000118197	1	DDX59	200593024	rs4437908	1	200648439	A	G	0.57598	-0.00472623	0.00672474	0.482172	-0.993072	0.0426449	6.005516e-120	0.0047592	0.00677474	0.482372	0.227017	20	cis	No
ENSG00000118200	1	CAMSAP2	200708686	rs7517047	1	200779848	C	G	0.880486	-0.00946114	0.00964389	0.326568	0.844737	0.13019	8.668896e-11	-0.0112001	0.0115462	0.332034	0.389775	20	cis	No
ENSG00000000971	1	CFH	196621008	rs1538687	1	196397775	C	T	0.318861	-0.00239425	0.00683024	0.725936	-0.268304	0.0729643	0.00023581	0.00892365	0.0255725	0.727123	0.964857	4	cis	No
ENSG00000224805	1	LINC00853	47644922	rs11211484	1	47708369	C	T	0.877451	-0.00473546	0.0120746	0.694923	0.532803	0.131938	5.384371e-05	-0.00888783	0.022769	0.69628	0.494688	3	cis	No
ENSG00000158109	1	TPRG1L	3541566	rs12757620	1	3540024	T	G	0.559174	0.00283286	0.00661341	0.668395	-0.392588	0.0557441	1.885681e-12	-0.00721586	0.0168768	0.668971	0.479444	20	cis	No
ENSG00000237481	1	ENSG00000237481	229455150	rs9435831	1	229413435	C	G	0.541433	0.00657456	0.00645488	0.308421	0.440024	0.0558086	3.157431e-15	0.0149414	0.0147913	0.312425	0.218967	17	cis	No
ENSG00000189266	1	PNRC2	24285599	rs17338135	1	24286897	C	T	0.0884692	0.00664605	0.0110205	0.546467	-0.43466	0.0546422	1.796223e-15	-0.0152902	0.0254271	0.547616	NA	NA	cis	No
ENSG00000125945	1	ZNF436	23685941	rs754984	1	23698120	C	G	0.929739	0.00593155	0.0108171	0.583452	1.66226	0.0952313	3.154671e-68	0.00356836	0.00651068	0.583638	0.160694	20	cis	No
ENSG00000162851	1	TFB2M	246703862	rs6695725	1	246118445	C	G	0.835434	-0.0117256	0.0142926	0.411993	0.491176	0.131669	0.000191198	-0.0238725	0.0297941	0.422988	NA	NA	cis	No
ENSG00000157184	1	CPT2	53662101	rs10788950	1	53713336	A	G	0.333683	0.00850313	0.00722438	0.239194	-0.319642	0.0754151	2.25086e-05	-0.026602	0.0234568	0.256757	0.359983	6	cis	No
ENSG00000162384	1	CZIB	53679771	rs370493	1	53675049	G	A	0.322596	0.000628729	0.00756596	0.933772	-0.607687	0.0572277	2.437664e-26	-0.00103463	0.0124508	0.933774	0.0282877	20	cis	No
ENSG00000185842	1	DNAH14	225083964	rs72757077	1	226301867	G	A	0.76774	0.00527773	0.00808559	0.513929	-0.340284	0.0919206	0.000213963	-0.0155098	0.0241278	0.520343	NA	NA	cis	No
ENSG00000116128	1	BCL9	147013182	rs11809333	1	146848404	T	G	0.671452	0.00993113	0.0074865	0.184661	-0.287912	0.0779678	0.000221881	-0.0344936	0.0276296	0.211874	0.47311	6	cis	No
ENSG00000127054	1	INTS11	1246965	rs2649594	1	1310975	C	T	0.0706116	-0.0371899	0.0112224	0.000919994	-0.5902	0.0827812	1.006309e-12	0.0630124	0.0209682	0.0026546	0.77682	20	cis	No
ENSG00000162576	1	MXRA8	1288069	rs1695855	1	1358442	C	T	0.935224	0.0280445	0.013387	0.0361796	-0.607723	0.0956661	2.11784e-10	-0.0461468	0.023195	0.0466443	0.393673	20	cis	No
ENSG00000179403	1	VWA1	1370241	rs1240700	1	1371459	A	G	0.772059	0.0212543	0.00951055	0.02543	0.351706	0.0589663	2.453462e-09	0.060432	0.028877	0.0363726	0.808347	20	cis	No
ENSG00000230415	1	ENSG00000230415	1210603	rs621668	1	1227249	T	C	0.961368	0.0444663	0.0140887	0.00159861	-0.748231	0.168023	8.462377e-06	-0.0594286	0.023079	0.0100239	0.818933	11	cis	No
ENSG00000231663	1	COA6-AS1	234508553	rs6693224	1	234503369	G	C	0.913165	0.00759651	0.0127778	0.552173	1.33068	0.0835223	3.798645e-57	0.00570874	0.00960914	0.552449	0.882911	20	cis	No
ENSG00000121310	1	ECHDC2	53361656	rs61292940	1	53331870	A	G	0.979108	-0.0189916	0.0195798	0.332066	0.985473	0.156128	2.755319e-10	-0.0192716	0.0201017	0.337707	0.726156	12	cis	No
ENSG00000174348	1	PODN	53527854	rs11206085	1	53527619	T	A	0.963585	-0.0314956	0.0161728	0.0514818	0.550832	0.108168	3.535986e-07	-0.0571782	0.0314344	0.068916	0.642316	17	cis	No
ENSG00000143379	1	SETDB1	150898739	rs72694826	1	151895687	A	G	0.96767	0.0149688	0.0223867	0.50372	-0.92561	0.265077	0.000479685	-0.0161718	0.0246253	0.511364	NA	NA	cis	No
ENSG00000178096	1	BOLA1	149859440	rs7524797	1	149873156	T	G	0.923553	0.0478194	0.0138442	0.000552108	-0.432414	0.107206	5.495559e-05	-0.110587	0.0421513	0.00870129	0.794189	5	cis	No
ENSG00000236439	1	ENSG00000236439	202440937	rs143501267	1	202945623	C	T	0.973623	0.00125745	0.0240364	0.958278	-0.952762	0.273288	0.000489753	-0.00131979	0.025231	0.958283	NA	NA	cis	No
ENSG00000188859	1	FAM78B	166026674	rs12562535	1	166992062	C	T	0.786064	0.0194844	0.00748269	0.00921631	-0.396519	0.0900473	1.065409e-05	-0.0491386	0.0219235	0.0250021	0.219378	8	cis	No
ENSG00000049247	1	UTS2	7903143	rs9434555	1	7981453	C	T	0.352358	0.00832035	0.00669241	0.213775	-0.636331	0.0517032	8.265503e-35	-0.0130755	0.0105707	0.216103	0.251541	20	cis	No
ENSG00000116688	1	MFN2	12040238	rs1810563	1	12054030	G	A	0.34162	0.0156241	0.00671279	0.019938	-0.615684	0.0646502	1.677383e-21	-0.0253768	0.0112239	0.0237614	0.714802	20	cis	No
ENSG00000116691	1	MIIP	12079523	rs6668188	1	12077114	T	C	0.216503	0.0159481	0.00763019	0.0366065	0.397351	0.0689592	8.306674e-09	0.0401361	0.0204269	0.0494306	0.394591	12	cis	No
ENSG00000228863	1	ENSG00000228863	160640568	rs61295253	1	160618921	G	A	0.857376	0.00319371	0.00910737	0.725833	-0.68343	0.122968	2.732286e-08	-0.00467306	0.0133525	0.726356	0.341953	15	cis	No
ENSG00000152382	1	TADA1	166825747	rs6677644	1	166931355	A	G	0.600724	-0.00541471	0.00684041	0.428608	-0.288816	0.0572944	4.633255e-07	0.018748	0.0239746	0.434218	0.159072	14	cis	No
ENSG00000272033	1	ENSG00000272033	167348345	rs79143249	1	168099672	C	T	0.981443	0.0562607	0.0335939	0.0939871	-1.56799	0.392524	6.479362e-05	-0.0358808	0.0232315	0.12247	NA	NA	cis	No
ENSG00000162409	1	PRKAA2	57110995	rs2746349	1	57126650	C	T	0.520775	-0.00243885	0.00648197	0.706729	0.426532	0.0564756	4.269595e-14	-0.00571786	0.0152158	0.707076	0.642228	20	cis	No
ENSG00000072694	1	FCGR2B	161551101	rs9427401	1	161492175	C	G	0.874767	0.00390657	0.0114694	0.733399	0.780177	0.138617	1.819958e-08	0.00500729	0.0147279	0.733867	0.0998681	15	cis	No
ENSG00000143258	1	USP21	161129240	rs10908797	1	160657197	C	G	0.110994	0.0137669	0.0119134	0.24785	-0.331653	0.0849044	9.376236e-05	-0.04151	0.0374602	0.267815	NA	NA	cis	No
ENSG00000059588	1	TARBP1	234527059	rs35232395	1	234478180	G	T	0.939893	0.00394147	0.0166727	0.81312	0.674151	0.18591	0.000287608	0.00584657	0.0247839	0.813509	NA	NA	cis	No
ENSG00000243155	1	ENSG00000243155	180913178	rs76014269	1	180923595	G	A	0.864496	-0.0107283	0.00963747	0.26563	0.501028	0.0816651	8.507764e-10	-0.0214126	0.0195495	0.273384	0.488571	6	cis	No
ENSG00000232628	1	LOC101927143	224396449	rs72755941	1	224423738	A	G	0.926471	0.0124676	0.0104378	0.232295	1.02762	0.108536	2.853379e-21	0.0121325	0.0102378	0.235989	0.0806338	20	cis	No
ENSG00000239887	1	C1orf226	162336698	rs164151	1	162338962	C	T	0.149743	-0.00947893	0.00916522	0.301029	-0.711862	0.0712923	1.771005e-23	0.0133157	0.0129439	0.303609	0.986609	14	cis	No
ENSG00000233057	1	EEF1A1P14	194158097	rs17593064	1	193174838	A	G	0.969888	0.0279986	0.0207913	0.178092	0.666588	0.170213	8.995862e-05	0.0420029	0.0329832	0.202854	NA	NA	cis	No
ENSG00000116747	1	RO60	193028552	rs10801193	1	193257845	A	G	0.781746	-0.00530255	0.00868304	0.541412	0.264827	0.0665598	6.926899e-05	-0.0200227	0.0331715	0.546103	0.851991	5	cis	No
ENSG00000091483	1	FH	241660903	rs4660101	1	241689251	C	T	0.975607	-0.0142706	0.0146398	0.329668	-0.623992	0.168453	0.000212023	0.0228698	0.0242603	0.345841	NA	NA	cis	No
ENSG00000116396	1	KCNC4	110753965	rs6682489	1	110815403	G	T	0.776844	-0.00310252	0.00759473	0.682899	0.476439	0.0657161	4.168977e-13	-0.00651189	0.0159659	0.683374	0.0258171	20	cis	No
ENSG00000232450	1	RPS2P14	114241506	rs17445407	1	113820865	A	G	0.981326	0.0709079	0.0317302	0.0254361	-0.911785	0.227073	5.935092e-05	-0.0777682	0.0398265	0.0508581	NA	NA	cis	No
ENSG00000154305	1	MIA3	222791428	rs4623691	1	223643905	G	A	0.49895	0.00285954	0.0064646	0.658245	-0.318183	0.0894962	0.000377592	-0.00898709	0.0204739	0.660695	NA	NA	cis	No
ENSG00000117707	1	PROX1	214156524	rs17023949	1	215143595	C	A	0.972456	0.0226641	0.0236214	0.337321	0.59484	0.143298	3.309193e-05	0.0381012	0.0407575	0.349878	NA	NA	cis	No
ENSG00000162946	1	DISC1	231762561	rs1417584	1	231819050	T	C	0.588235	0.00693253	0.00714441	0.331876	-0.354419	0.096627	0.000244544	-0.0195603	0.0208516	0.348207	0.388238	4	cis	No
ENSG00000162391	1	FAM151A	55074855	rs115110815	1	55110419	C	T	0.932773	0.00123279	0.0131871	0.925519	-0.836373	0.184871	6.065374e-06	-0.00147397	0.0157704	0.925535	0.176016	7	cis	No
ENSG00000244256	1	RN7SL130P	64121414	rs11577715	1	64237567	C	G	0.893441	0.00413833	0.00992751	0.676784	0.616473	0.158914	0.000104764	0.00671291	0.0161964	0.678531	0.898806	4	cis	No
ENSG00000243725	1	TTC4	55181495	rs57117515	1	55184460	A	T	0.95063	-0.0174289	0.0122653	0.155319	0.946311	0.122515	1.127119e-14	-0.0184177	0.0131787	0.162251	0.15601	13	cis	No
ENSG00000132780	1	NASP	46049518	rs324413	1	46816806	C	G	0.118581	-0.0155287	0.0115415	0.178474	0.390873	0.113814	0.000594039	-0.0397283	0.0317126	0.210294	NA	NA	cis	No
ENSG00000160856	1	FCRL3	157644111	rs3761959	1	157669278	C	T	0.542017	-0.0173856	0.0064314	0.00686676	0.386997	0.0555571	3.266609e-12	-0.0449244	0.0178263	0.0117314	0.496749	20	cis	No
ENSG00000160781	1	PAQR6	156213206	rs759329	1	156230936	A	G	0.503385	-0.00312994	0.00642235	0.62601	-0.535291	0.0526716	2.906147e-24	0.00584717	0.0120117	0.626406	0.267792	15	cis	No
ENSG00000198952	1	SMG5	156219015	rs933489	1	156235120	T	C	0.500817	-0.00360915	0.00636737	0.570837	-0.333895	0.0552887	1.54962e-09	0.0108092	0.0191538	0.572523	0.411589	8	cis	No
ENSG00000117242	1	PINK1-AS	20969150	rs9287034	1	20973892	C	T	0.601774	-0.00281832	0.00660968	0.669822	0.746537	0.0498428	1.025036e-50	-0.00377519	0.00885737	0.669948	0.164456	20	cis	No
ENSG00000158825	1	CDA	20915441	rs66731853	1	20916238	G	A	0.682306	-0.00600914	0.00718275	0.402813	0.813897	0.0530725	4.422897e-53	-0.00738317	0.00883826	0.403512	0.679776	20	cis	No
ENSG00000135870	1	RC3H1	173900352	rs16846683	1	174083339	T	C	0.821895	-0.014733	0.00782254	0.0596463	-0.292043	0.0881214	0.000919391	0.0504481	0.0308088	0.101536	NA	NA	cis	No
ENSG00000142920	1	AZIN2	33546705	rs77509875	1	33523709	C	T	0.961018	-0.0183975	0.0201743	0.361807	-0.883079	0.138068	1.595243e-10	0.0208334	0.0230764	0.366633	0.5697	4	cis	No
ENSG00000229808	1	ENSG00000229808	161860623	rs73019349	1	161868268	T	A	0.962535	0.0168181	0.0169423	0.320871	-0.64121	0.136707	2.726807e-06	-0.0262287	0.0270076	0.33147	0.885954	6	cis	No
ENSG00000162714	1	ZNF496	247460714	rs4320815	1	247481269	G	A	0.387605	0.0113538	0.00658514	0.0846807	-0.592727	0.0542126	7.982464e-28	-0.0191552	0.0112472	0.0885478	0.110871	20	cis	No
ENSG00000117115	1	PADI2	17393256	rs6586497	1	17378635	C	T	0.36578	-0.00148508	0.00661093	0.822259	-0.305919	0.0563551	5.685683e-08	0.00485449	0.0216286	0.822409	0.764043	20	cis	No
ENSG00000159363	1	ATP13A2	17312453	rs4920608	1	17319287	C	T	0.359944	-0.00469542	0.00669127	0.482852	0.694694	0.0904157	1.550045e-14	-0.00675898	0.00967206	0.484668	0.687748	20	cis	No
ENSG00000215908	1	CROCCP2	16944751	rs11586910	1	17276357	T	C	0.827614	0.0218585	0.00937383	0.0197081	0.581322	0.0692039	4.459766e-17	0.0376014	0.0167348	0.0246466	0.363154	20	cis	No
ENSG00000238142	1	LOC105376805	17215033	rs157130	1	16793399	C	T	0.346055	0.00457802	0.00676434	0.498541	-0.579717	0.0564602	9.851877e-25	-0.00789699	0.0116937	0.499471	0.120615	20	cis	No
ENSG00000261135	1	ENSG00000261135	16841140	rs7513616	1	17298496	A	G	0.503501	-0.000419601	0.00669615	0.950035	-0.425691	0.090077	2.29146e-06	0.000985694	0.0157315	0.950039	0.447283	13	cis	No
ENSG00000058804	1	NDC1	54231133	rs79506024	1	53432394	A	G	0.979925	-0.0151054	0.0203231	0.457323	1.23611	0.323832	0.000135011	-0.0122201	0.01675	0.465659	0.510723	5	cis	No
ENSG00000134716	1	CYP2J2	60358980	rs10789082	1	60357969	A	G	0.758449	-0.0133148	0.00764319	0.0815004	-0.500657	0.0607894	1.781725e-16	0.0265947	0.0156041	0.0883178	0.691289	7	cis	No
ENSG00000117616	1	RSRP1	25568728	rs2982315	1	26001950	G	A	0.0526377	-0.0223424	0.0193777	0.248913	-0.88019	0.222829	7.81312e-05	0.0253836	0.0229341	0.268377	NA	NA	cis	No
ENSG00000225670	1	ENSG00000225670	159165775	rs3027013	1	159174209	C	T	0.919935	-0.00371081	0.0134707	0.782953	0.61058	0.100012	1.027518e-09	-0.00607752	0.0220846	0.783168	0.502154	18	cis	No
ENSG00000162735	1	PEX19	160246602	rs11584887	1	159761433	C	T	0.901261	0.00257495	0.0133959	0.84757	-0.549745	0.129699	2.248889e-05	-0.0046839	0.0243925	0.847725	NA	NA	cis	No
ENSG00000043514	1	TRIT1	40306723	rs79540048	1	40313107	G	A	0.898459	-0.00276724	0.011897	0.816072	-1.15392	0.113042	1.828775e-24	0.00239812	0.0103127	0.816119	0.36209	20	cis	No
ENSG00000228477	1	ENSG00000228477	40428352	rs3131700	1	40428328	G	T	0.460201	0.0179453	0.00724994	0.0133151	-0.375747	0.0554174	1.199161e-11	-0.047759	0.0205402	0.0200643	0.674291	18	cis	No
ENSG00000183726	1	TMEM50A	25664408	rs55794721	1	25561667	G	A	0.603408	-0.00773453	0.00831191	0.352094	0.622346	0.051757	2.645826e-33	-0.012428	0.0133957	0.353531	0.116919	20	cis	No
ENSG00000224183	1	ENSG00000224183	25620655	rs55794721	1	25561667	G	A	0.603408	-0.00773453	0.00831191	0.352094	-0.735057	0.0498969	4.046046e-49	0.0105224	0.0113304	0.353052	0.265011	20	cis	No
ENSG00000157916	1	RER1	2323267	rs61760854	1	2341060	C	T	0.779062	0.00439174	0.00926626	0.635536	0.32154	0.0859279	0.000182579	0.0136585	0.0290486	0.638217	NA	NA	cis	No
ENSG00000143674	1	MAP3K21	233463514	rs1294292	1	233470408	A	G	0.227941	-0.00843984	0.00865729	0.329619	0.409055	0.0681925	1.991023e-09	-0.0206325	0.0214418	0.33592	0.256078	20	cis	No
ENSG00000135828	1	RNASEL	182542769	rs115886573	1	182541031	G	A	0.696545	0.011537	0.00730464	0.114243	0.605788	0.0596417	3.080288e-24	0.0190446	0.012203	0.118606	0.385125	20	cis	No
ENSG00000121774	1	KHDRBS1	32479430	rs4949489	1	32529888	C	T	0.980509	0.000369633	0.0290727	0.989856	0.85926	0.217636	7.875653e-05	0.000430176	0.0338348	0.989856	0.0899072	3	cis	No
ENSG00000162910	1	MRPL55	228294380	rs822740	1	228287796	T	C	0.330415	-0.00292842	0.00701456	0.676329	0.358707	0.0762052	2.512407e-06	-0.00816382	0.0196319	0.677523	0.799907	20	cis	No
ENSG00000118873	1	RAB3GAP2	220321635	rs12044558	1	220270160	A	G	0.691849	-0.0263397	0.00668693	8.18259e-05	-0.381628	0.0584497	6.613552e-11	0.0690193	0.0204638	0.00074423	0.554467	14	cis	No
ENSG00000136628	1	EPRS1	220141943	rs1391566	1	220156427	T	C	0.528361	-0.000191694	0.00646681	0.976352	0.268899	0.0557113	1.388491e-06	-0.000712885	0.0240497	0.976352	0.181451	20	cis	No
ENSG00000158286	1	RNF207	6265535	rs4908540	1	6266096	A	G	0.718137	0.00543992	0.00723928	0.452385	-0.761522	0.0546139	3.435075e-44	-0.00714348	0.00952013	0.45304	0.0750255	20	cis	No
ENSG00000162642	1	C1orf52	85715639	rs17385079	1	85591287	T	A	0.626984	0.00335156	0.00690614	0.627462	-0.28449	0.0768426	0.000213701	-0.0117809	0.0244832	0.630385	0.45728	4	cis	No
ENSG00000143033	1	MTF2	93544792	rs76474787	1	93802860	A	G	0.986345	0.00442993	0.0334737	0.894715	-1.45389	0.433474	0.000796399	-0.00304695	0.0230415	0.894796	NA	NA	cis	No
ENSG00000159208	1	CIART	150254953	rs141494464	1	149847301	C	T	0.920477	0.0507082	0.0147399	0.000581303	0.627498	0.162295	0.000110457	0.0808101	0.0314423	0.0101665	0.478562	6	cis	No
ENSG00000187889	1	FYB2	57184477	rs1738400	1	57247608	G	A	0.321078	-0.00394377	0.00779437	0.612873	-0.235942	0.0598197	8.006096e-05	0.016715	0.0333058	0.615763	0.597346	5	cis	No
ENSG00000185031	1	ENSG00000185031	65450291	rs66460461	1	66317019	T	C	0.938842	0.0188232	0.0105293	0.0738251	-0.60367	0.135044	7.815783e-06	-0.0311813	0.0187852	0.0969381	0.154267	6	cis	No
ENSG00000058799	1	YIPF1	54317392	rs61774830	1	54340621	T	G	0.957049	0.00589014	0.0134366	0.661122	0.77912	0.123236	2.579014e-10	0.00755999	0.0172873	0.661883	0.539971	13	cis	No
ENSG00000130766	1	SESN2	28586038	rs7511927	1	28200529	C	G	0.922465	0.00321972	0.0151686	0.831903	-0.610125	0.138415	1.04354e-05	-0.00527715	0.0248903	0.832094	0.704413	3	cis	No
ENSG00000187554	1	TLR5	223282748	rs17775091	1	223250306	T	G	0.606209	-0.011154	0.00788042	0.15695	0.327921	0.0736379	8.461634e-06	-0.0340143	0.0252161	0.177366	0.262701	12	cis	No
ENSG00000126067	1	PSMB2	36067185	rs274133	1	36581792	G	A	0.11753	-0.0107925	0.00855012	0.206852	-0.692769	0.146664	2.317899e-06	0.0155788	0.012775	0.222665	0.386936	20	cis	No
ENSG00000228606	1	LOC100287049	160231534	rs12239946	1	160319055	T	C	0.816293	0.000450526	0.0105991	0.966095	0.37261	0.0929402	6.094149e-05	0.00120911	0.0284472	0.966097	NA	NA	cis	No
ENSG00000162729	1	IGSF8	160061130	rs12092798	1	160071819	T	C	0.781046	0.00520455	0.00782675	0.506069	-0.578008	0.0839033	5.619452e-12	-0.00900429	0.0136038	0.50804	0.746917	12	cis	No
ENSG00000179914	1	ITLN1	160846329	rs6700408	1	160862958	A	G	0.345588	0.00587571	0.00684668	0.390791	-0.559341	0.0882696	2.346875e-10	-0.0105047	0.0123524	0.395091	0.696624	20	cis	No
ENSG00000143368	1	SF3B4	149895209	rs72692819	1	149903122	G	C	0.92472	0.037885	0.0138204	0.00612088	-0.586334	0.153384	0.000132019	-0.0646133	0.029005	0.0259028	0.281049	5	cis	No
ENSG00000150337	1	FCGR1A	149754227	rs112841211	1	149880275	T	C	0.92577	0.0493747	0.0142141	0.000513422	0.482035	0.102579	2.6125e-06	0.10243	0.0366695	0.00521704	0.202902	13	cis	No
ENSG00000184371	1	CSF1	110452864	rs2839955	1	111066154	C	G	0.97619	-0.0034121	0.0248661	0.890858	0.935427	0.247296	0.000155189	-0.00364764	0.0266001	0.890929	NA	NA	cis	No
ENSG00000227232	1	WASH7P	14363	rs28504611	1	908414	C	T	0.976424	-0.0194767	0.0234308	0.405834	0.630968	0.109998	9.683322e-09	-0.030868	0.0375226	0.410707	0.0869754	4	cis	No
ENSG00000237094	1	ENSG00000237094	317720	rs1695826	1	1364143	A	G	0.947246	0.00750989	0.0167803	0.654483	-0.414442	0.100552	3.761468e-05	-0.0181205	0.0407269	0.656373	0.185697	4	cis	No
ENSG00000134668	1	SPOCD1	32256023	rs35405061	1	32270835	C	T	0.30859	0.00512543	0.00695404	0.461096	0.491556	0.103942	2.25451e-06	0.010427	0.0143178	0.466459	0.288575	4	cis	No
ENSG00000235169	1	SMIM1	3689352	rs1181873	1	3683690	A	C	0.577965	-0.00759913	0.00765585	0.320909	-0.283957	0.0556659	3.376951e-07	0.0267616	0.027467	0.329899	0.37518	20	cis	No
ENSG00000135776	1	ABCB10	229652329	rs61826961	1	229053273	G	A	0.798669	-0.00224923	0.00902547	0.803199	-0.409029	0.0872901	2.787869e-06	0.00549895	0.0220968	0.803471	0.789648	3	cis	No
ENSG00000159166	1	LAD1	201342372	rs788801	1	202301291	A	G	0.64986	0.00920614	0.00686721	0.180052	-0.288489	0.0763492	0.000157747	-0.0319116	0.0252579	0.206434	NA	NA	cis	No
ENSG00000117335	1	CD46	207925402	rs2724391	1	207953244	T	C	0.4169	0.00995896	0.0070058	0.155162	-0.423124	0.0918557	4.09705e-06	-0.0235367	0.0173278	0.174361	0.271933	19	cis	No
ENSG00000049249	1	TNFRSF9	7979907	rs9434555	1	7981453	C	T	0.352358	0.00832035	0.00669241	0.213775	0.288055	0.0720098	6.32838e-05	0.0288846	0.0243293	0.235136	NA	NA	cis	No
ENSG00000130940	1	CASZ1	10696661	rs12407506	1	10302325	G	A	0.962068	0.00343616	0.0203212	0.865724	-0.953424	0.24697	0.000113163	-0.00360402	0.0213344	0.865851	NA	NA	cis	No
ENSG00000097021	1	ACOT7	6324329	rs6701975	1	6416010	A	G	0.856793	0.017243	0.00885609	0.0515316	0.513108	0.116376	1.038209e-05	0.033605	0.0188677	0.0748979	0.283157	15	cis	No
ENSG00000117448	1	AKR1A1	46016215	rs115041149	1	45035390	G	A	0.995331	0.0264065	0.0260836	0.311358	1.00344	0.22005	5.113787e-06	0.026316	0.0266271	0.322998	NA	NA	cis	No
ENSG00000224870	1	MRPL20-AS1	1334902	rs143038747	1	1354060	G	A	0.962885	0.039225	0.0159617	0.0139928	-0.88955	0.185587	1.641611e-06	-0.0440953	0.0201644	0.028758	0.74773	12	cis	No
ENSG00000225285	1	ENSG00000225285	1365919	rs1695825	1	1364349	T	C	0.780812	0.0209955	0.0094904	0.0269471	0.326959	0.0708898	3.983966e-06	0.0642145	0.0321926	0.0460762	0.94214	20	cis	No
ENSG00000160072	1	ATAD3B	1407143	rs116803952	1	1450274	G	A	0.984827	0.0557146	0.0344446	0.105768	-2.22875	0.249836	4.627475e-19	-0.0249981	0.0157067	0.111483	0.349592	17	cis	No
ENSG00000189409	1	MMP23B	1567474	rs28736713	1	1617586	T	G	0.565009	-0.00771579	0.00865935	0.37291	-0.597494	0.0872208	7.366495e-12	0.0129136	0.0146149	0.376916	0.525246	9	cis	No
ENSG00000125459	1	MSTO1	155579979	rs1111102	1	155993456	G	T	0.270542	-0.00350874	0.00746583	0.638374	-0.316422	0.0755737	2.827522e-05	0.0110888	0.0237427	0.640471	0.681621	20	cis	No
ENSG00000225855	1	RUSC1-AS1	155286654	rs348192	1	155668062	G	A	0.756461	0.00608103	0.0113399	0.591785	0.369448	0.0741313	6.238098e-07	0.0164598	0.0308713	0.593914	0.561628	20	cis	No
ENSG00000116679	1	IVNS1ABP	185265520	rs12134934	1	186281400	C	T	0.949813	-0.000748649	0.0173046	0.965492	-1.04556	0.253225	3.643882e-05	0.000716027	0.0165515	0.965494	0.81952	8	cis	No
ENSG00000226015	1	CCT8P1	146674857	rs894471	1	146687913	A	G	0.923903	0.0245079	0.0139441	0.0788196	-0.917251	0.175514	1.731422e-07	-0.0267189	0.0160387	0.0957343	0.0266794	20	cis	No
ENSG00000230092	1	ENSG00000230092	736259	rs3115850	1	761147	T	C	0.156162	0.00304214	0.0118088	0.796704	-0.379211	0.0708111	8.543885e-08	-0.00802229	0.0311765	0.796933	NA	NA	cis	No
ENSG00000237491	1	LINC01409	714150	rs3094315	1	752566	G	A	0.155462	0.00452832	0.0111734	0.685274	-0.38097	0.0840026	5.754379e-06	-0.0118863	0.0294457	0.686457	NA	NA	cis	No
ENSG00000198830	1	HMGN2	26798941	rs34774220	1	26903412	C	T	0.55789	-0.00304292	0.0075018	0.685018	0.283262	0.0574759	8.292174e-07	-0.0107424	0.0265732	0.686023	0.789882	7	cis	No
ENSG00000197622	1	CDC42SE1	151023447	rs3806387	1	151031476	T	A	0.20028	0.0290647	0.00854796	0.000673391	-0.485683	0.0651868	9.289316e-14	-0.0598429	0.019346	0.00197944	0.0227378	20	cis	No
ENSG00000143776	1	CDC42BPA	227177566	rs2999725	1	227321057	C	G	0.871769	0.0178778	0.00888738	0.0442623	-0.610672	0.146257	2.975531e-05	-0.0292756	0.0161544	0.0699495	0.840728	4	cis	No
ENSG00000040487	1	SLC66A1	19638820	rs214313	1	19648390	G	A	0.293184	-0.00557242	0.00712641	0.43425	0.352662	0.0795825	9.362205e-06	-0.015801	0.0205197	0.441274	0.629054	6	cis	No
ENSG00000158747	1	NBL1	19967048	rs115614639	1	19971135	C	A	0.764706	0.00187851	0.0123423	0.879028	0.460591	0.107265	1.755092e-05	0.00407848	0.0268135	0.879104	0.309503	4	cis	No
ENSG00000076864	1	RAP1GAP	21922708	rs78513539	1	21961337	C	T	0.955299	-0.0251887	0.0176572	0.153713	-0.901569	0.126884	1.199301e-12	0.0279387	0.0199758	0.161924	0.173414	8	cis	No
ENSG00000162551	1	ALPL	21835858	rs12744514	1	21744700	G	A	0.459384	-0.00361304	0.00765885	0.637107	-0.389802	0.0939092	3.31256e-05	0.00926891	0.0197745	0.639263	0.61082	5	cis	No
ENSG00000122482	1	ZNF644	91380859	rs71668053	1	91498153	T	C	0.973856	-0.0142952	0.0248217	0.564674	-1.46066	0.302133	1.33487e-06	0.00978681	0.0171136	0.567409	NA	NA	cis	No
ENSG00000116830	1	TTF2	117602925	rs12022333	1	117596069	T	C	0.953198	-0.0340089	0.0128268	0.00801628	0.898339	0.108744	1.44426e-16	-0.0378575	0.0149957	0.0115846	0.755053	7	cis	No
ENSG00000173406	1	DAB1	57460451	rs68192782	1	59035247	A	G	0.827381	-0.0100563	0.00921476	0.275127	-0.47573	0.10952	1.40044e-05	0.0211387	0.0199717	0.289859	0.982007	14	cis	No
ENSG00000163531	1	NFASC	204797779	rs869841	1	204812118	G	C	0.899627	-0.0120757	0.00907965	0.183527	0.860105	0.0884854	2.470484e-22	-0.0140398	0.0106548	0.187605	0.0207271	20	cis	No
ENSG00000198625	1	MDM4	204485511	rs4951410	1	204563817	G	A	0.54972	0.0312748	0.00659772	2.13457e-06	-0.332805	0.0555582	2.095747e-09	-0.0939733	0.0252809	0.000201464	0.014711	15	cis	No
ENSG00000176092	1	CRYBG2	26648350	rs61776528	1	26697398	T	C	0.896475	-0.0134463	0.00902601	0.136296	-0.922619	0.144851	1.897513e-10	0.0145741	0.0100471	0.146897	0.890461	20	cis	No
ENSG00000231551	1	PDE4DIPP6	147887350	rs2932455	1	147826736	T	G	0.857726	-0.00152872	0.00872476	0.860909	0.618858	0.0724652	1.341354e-17	-0.00247023	0.0141011	0.860939	0.182065	15	cis	No
ENSG00000187800	1	PEAR1	156863490	rs12035664	1	156647931	G	A	0.661765	0.00458204	0.00668655	0.493179	-0.35833	0.0923705	0.00010477	-0.0127872	0.0189492	0.499794	0.296656	3	cis	No
ENSG00000143494	1	VASH2	213123862	rs3010763	1	213135009	T	C	0.446895	-0.00880217	0.00665377	0.185874	-0.299924	0.056102	8.989449e-08	0.029348	0.022854	0.199088	0.929431	18	cis	No
ENSG00000162522	1	KIAA1522	33207486	rs172392	1	34044444	G	C	0.230859	-0.00637558	0.00980706	0.515627	-0.297186	0.081644	0.000272612	0.0214532	0.0335219	0.522189	NA	NA	cis	No
ENSG00000160678	1	S100A1	153600402	rs28518786	1	153608116	G	C	0.539566	0.00748792	0.0065146	0.250389	0.473465	0.0955743	7.274175e-07	0.0158152	0.0141249	0.262857	0.562	18	cis	No
ENSG00000160710	1	ADAR	154554538	rs4845384	1	154587669	A	G	0.315009	-0.00624281	0.00692727	0.367486	0.37413	0.0996176	0.000172883	-0.0166862	0.0190413	0.380857	0.542622	3	cis	No
ENSG00000189171	1	S100A13	153591263	rs9792913	1	153582403	G	A	0.521592	0.00564395	0.00671334	0.400512	1.0765	0.0724698	6.508922e-50	0.00524287	0.00624625	0.401265	0.549275	20	cis	No
ENSG00000187961	1	KLHL17	895967	rs13303160	1	901559	G	A	0.0853175	-0.0245966	0.0124567	0.0483177	0.44067	0.0717298	8.073701e-10	-0.0558164	0.0296918	0.0601278	0.720814	16	cis	No
ENSG00000188976	1	NOC2L	879584	rs13303229	1	897564	T	C	0.057423	-0.0298268	0.016204	0.0656643	-0.856773	0.0989616	4.816667e-18	0.034813	0.0193356	0.0717877	0.579916	11	cis	No
ENSG00000225972	1	MTND1P23	564442	rs7522959	1	905165	A	G	0.0497018	2.80995e-05	0.0228307	0.999018	-0.385066	0.0858247	7.234973e-06	-7.29732e-05	0.0592904	0.999018	0.297931	6	cis	No
ENSG00000163444	1	TMEM183A	202976514	rs12130040	1	202959138	C	T	0.882236	-0.0139974	0.010065	0.164315	0.91377	0.127601	8.000438e-13	-0.0153183	0.0112206	0.172192	0.889848	12	cis	No
ENSG00000117139	1	KDM5B	202696526	rs28446214	1	202814485	G	A	0.981793	0.0232427	0.0151903	0.125993	0.901472	0.183898	9.485427e-07	0.0257831	0.0176523	0.144125	0.0778982	7	cis	No
ENSG00000232175	1	ENSG00000232175	233052981	rs2104043	1	233045499	A	G	0.349556	-0.00882845	0.00663446	0.183289	0.352977	0.0585151	1.617038e-09	-0.0250114	0.0192476	0.193788	0.940953	10	cis	No
ENSG00000227001	1	ENSG00000227001	21751118	rs7541779	1	21794612	G	T	0.236811	0.0109274	0.00761258	0.151162	1.1015	0.0514883	1.545306e-101	0.00992047	0.00692664	0.152081	0.652855	20	cis	No
ENSG00000260855	1	ENSG00000260855	246935603	rs4926466	1	246968469	G	A	0.398343	-0.00353391	0.00693622	0.610411	0.408299	0.0570434	8.204642e-13	-0.0086552	0.0170311	0.611313	0.167128	20	cis	No
ENSG00000121644	1	DESI2	244816237	rs6681989	1	244903742	C	T	0.845005	-0.00152055	0.00908547	0.867086	0.67302	0.0748172	2.351101e-19	-0.00225929	0.0135019	0.867109	0.998878	20	cis	No
ENSG00000179397	1	CATSPERE	244617679	rs3006010	1	244631554	C	T	0.67577	0.00717743	0.00683337	0.293557	0.303778	0.0577041	1.406442e-07	0.0236272	0.022938	0.302988	0.144872	10	cis	No
ENSG00000154309	1	DISP1	222988406	rs74857131	1	222983098	C	T	0.744748	0.0159683	0.00843343	0.0582979	0.390173	0.0649344	1.869829e-09	0.0409262	0.0226623	0.0709321	0.468776	14	cis	No
ENSG00000119280	1	C1orf198	230972865	rs566106	1	231356559	A	G	0.65803	-0.00317106	0.0066725	0.634614	-0.294612	0.0741894	7.154719e-05	0.0107635	0.02281	0.637015	0.195092	6	cis	No
ENSG00000143036	1	SLC44A3	95285898	rs859117	1	95306057	T	G	0.133987	-0.00109752	0.0112488	0.922275	0.898668	0.0742375	9.899611e-34	-0.00122127	0.0125176	0.922278	0.310495	18	cis	No
ENSG00000224081	1	SLC44A3-AS1	95104017	rs12048606	1	95292491	G	A	0.617063	0.00501524	0.0065705	0.445287	0.657979	0.0846763	7.816506e-15	0.00762219	0.0100339	0.44747	0.136837	20	cis	No
ENSG00000122477	1	LRRC39	100614409	rs76911542	1	100429524	A	G	0.953782	0.0123163	0.0160173	0.441932	1.04346	0.117358	6.042783e-19	0.0118033	0.0154075	0.44363	0.275708	20	cis	No
ENSG00000131236	1	CAP1	40505905	rs75840356	1	41432209	A	G	0.935924	-0.0377341	0.0150969	0.0124385	0.780838	0.178614	1.233139e-05	-0.0483251	0.0222712	0.0300186	NA	NA	cis	No
ENSG00000259943	1	ENSG00000259943	40722099	rs61780442	1	40649468	A	G	0.906279	0.00308846	0.0108134	0.775175	-0.826424	0.0935531	1.012289e-18	-0.00373714	0.0130914	0.775288	0.155167	20	cis	No
ENSG00000188092	1	GPR89B	147400506	rs74123749	1	147385583	T	C	0.960901	-0.00806333	0.0186749	0.665906	0.64007	0.157655	4.908606e-05	-0.0125976	0.0293409	0.667667	0.349328	4	cis	No
ENSG00000117318	1	ID3	23884409	rs150447725	1	23876955	C	T	0.980119	0.00951769	0.0314171	0.761931	-0.96566	0.255754	0.000159534	-0.00985615	0.0326389	0.762671	NA	NA	cis	No
ENSG00000037637	1	FBXO42	16573334	rs78399199	1	16643703	A	G	0.611811	0.0216877	0.00664946	0.00110793	0.316885	0.0711263	8.379736e-06	0.0684403	0.0260058	0.0084952	0.744775	8	cis	No
ENSG00000157191	1	NECAP2	16767167	rs698864	1	16771474	C	T	0.727941	-0.0100994	0.0070134	0.149863	0.601323	0.0612155	8.958675e-23	-0.0167953	0.0117879	0.154219	0.0125266	20	cis	No
ENSG00000237276	1	ENSG00000237276	16542404	rs221063	1	16537289	T	G	0.260037	0.0358247	0.00780542	4.43829e-06	-0.568777	0.0593536	9.439431e-22	-0.0629855	0.015216	3.481673e-05	0.315373	20	cis	No
ENSG00000121940	1	CLCC1	109472130	rs338486	1	109479430	C	T	0.737979	-0.00403603	0.00805389	0.616281	0.402587	0.0604578	2.757401e-11	-0.0100252	0.0200619	0.617276	0.890644	20	cis	No
ENSG00000197780	1	TAF13	109605108	rs8856	1	109605305	T	G	0.824056	-0.0139617	0.00797861	0.0801369	0.379584	0.0761373	6.179508e-07	-0.0367816	0.0222765	0.0987106	0.846373	6	cis	No
ENSG00000229953	1	ENSG00000229953	156616299	rs4661210	1	156634639	A	G	0.587535	0.0171076	0.00696372	0.0140227	0.44522	0.0556643	1.26148e-15	0.038425	0.0163622	0.0188544	0.217773	20	cis	No
ENSG00000272068	1	ENSG00000272068	156607575	rs4661210	1	156634639	A	G	0.587535	0.0171076	0.00696372	0.0140227	0.515452	0.0545823	3.602793e-21	0.0331895	0.0139596	0.0174284	0.478379	20	cis	No
ENSG00000044012	1	GUCA2B	42619092	rs138570586	1	43510165	G	T	0.95775	-0.011662	0.0228167	0.609269	0.684527	0.204517	0.000816772	-0.0170366	0.0337185	0.613376	NA	NA	cis	No
ENSG00000116473	1	RAP1A	112084840	rs72697816	1	112222279	C	T	0.840803	0.00652138	0.00901859	0.469615	-0.506927	0.0772549	5.31814e-11	-0.0128645	0.0178984	0.472293	0.698355	20	cis	No
ENSG00000197852	1	INKA2	112223252	rs7529641	1	112147956	C	A	0.774627	0.00720956	0.00777956	0.354066	0.346999	0.0676489	2.906536e-07	0.0207769	0.0227825	0.361786	0.348911	11	cis	No
ENSG00000177133	1	PRDM16-DT	2976179	rs59417818	1	2409360	G	A	0.504902	-0.00586806	0.00752039	0.435222	-0.45142	0.0933494	1.326028e-06	0.0129991	0.0168749	0.441108	0.284568	3	cis	No
ENSG00000092969	1	TGFB2	218519577	rs78331112	1	218570176	C	T	0.962885	0.0177297	0.0136255	0.193184	-0.582223	0.137314	2.234471e-05	-0.0304517	0.0244798	0.213516	0.213742	4	cis	No
ENSG00000162814	1	SPATA17	217804666	rs11117903	1	217820233	T	C	0.378852	-0.00864027	0.00694144	0.213228	0.300883	0.0599133	5.114303e-07	-0.0287164	0.0237683	0.226978	0.210838	6	cis	No
ENSG00000197429	1	IPP	46159996	rs12567928	1	46928758	G	T	0.99078	0.0183765	0.0142371	0.196791	0.973034	0.284223	0.000618244	0.0188858	0.0156371	0.227141	NA	NA	cis	No
ENSG00000116198	1	CEP104	3728645	rs6699784	1	3762076	T	C	0.561041	-0.000403301	0.00658967	0.951198	0.697146	0.0515807	1.264507e-41	-0.000578503	0.00945245	0.951199	0.58177	20	cis	No
ENSG00000090621	1	PABPC4	40026488	rs3768321	1	40035928	G	T	0.809874	0.00330353	0.00841007	0.694462	-0.683867	0.0669116	1.605916e-24	-0.00483066	0.0123069	0.694677	0.179567	20	cis	No
ENSG00000162415	1	ZSWIM5	45482071	rs61788380	1	45504858	G	T	0.903478	0.0216179	0.013004	0.0964334	0.539011	0.10131	1.035351e-07	0.0401066	0.0252759	0.112569	0.247129	20	cis	No
ENSG00000117560	1	FASLG	172628154	rs12142308	1	173254253	T	C	0.885971	0.00504018	0.011589	0.663628	0.430107	0.125452	0.000607039	0.0117184	0.0271604	0.666139	NA	NA	cis	No
ENSG00000120333	1	MRPS14	174979925	rs859376	1	175429301	A	G	0.336718	-0.0175315	0.00683618	0.010332	-0.312623	0.0912448	0.000612088	0.0560787	0.0273143	0.0400639	NA	NA	cis	No
ENSG00000239494	1	RN7SL333P	169828897	rs513287	1	170664237	G	A	0.535831	0.00495218	0.00641181	0.439906	0.224853	0.0586468	0.000126066	0.0220241	0.0290884	0.448964	NA	NA	cis	No
ENSG00000117625	1	RCOR3	211431719	rs3125832	1	211400180	C	A	0.747316	-0.0111081	0.0072707	0.126566	-0.273929	0.0655485	2.9276e-05	0.040551	0.0282604	0.151314	0.760868	3	cis	No
ENSG00000116711	1	PLA2G4A	186798085	rs2383477	1	186351104	C	T	0.846755	0.0270814	0.00937121	0.00385428	-0.495097	0.122329	5.182128e-05	-0.0546992	0.0232579	0.01868	0.646934	4	cis	No
ENSG00000273129	1	ENSG00000273129	186649754	rs72711758	1	186176963	G	A	0.806606	0.00735441	0.00948832	0.438279	0.335766	0.090496	0.000207027	0.0219034	0.0288688	0.448019	NA	NA	cis	No
ENSG00000054118	1	THRAP3	36690017	rs146532712	1	36681458	C	T	0.885738	0.00607895	0.0118299	0.607348	0.441138	0.0868499	3.78798e-07	0.0137802	0.0269537	0.609174	0.924134	15	cis	No
ENSG00000134697	1	GNL2	38032417	rs6619	1	38030696	T	C	0.549253	-0.0129285	0.00646099	0.0453914	-0.382584	0.0695111	3.714165e-08	0.0337926	0.0179692	0.0600289	0.31261	14	cis	No
ENSG00000084073	1	ZMPSTE24	40723779	rs11207771	1	40752439	G	T	0.933473	-0.000565911	0.0105229	0.957111	-1.07903	0.213383	4.264085e-07	0.000524463	0.00975274	0.957114	0.289391	9	cis	No
ENSG00000131238	1	PPT1	40538379	rs3131650	1	40555723	T	G	0.276494	0.0081156	0.0071366	0.255463	-0.603688	0.0566803	1.729624e-26	-0.0134434	0.0118889	0.258159	0.770447	20	cis	No
ENSG00000117308	1	GALE	24122089	rs74414073	1	23125568	T	C	0.959967	-0.0311464	0.0217739	0.152589	-0.845259	0.256745	0.000994025	0.0368484	0.0280865	0.189534	NA	NA	cis	No
ENSG00000155366	1	RHOC	113243728	rs150466368	1	112616427	T	A	0.982026	-0.0265877	0.0304625	0.382771	1.08051	0.261435	3.580711e-05	-0.0246066	0.0288145	0.393123	NA	NA	cis	No
ENSG00000173947	1	PIFO	111888910	rs12030677	1	112284768	C	T	0.920518	-0.00204852	0.0129895	0.874688	0.46627	0.12074	0.000112574	-0.00439342	0.0278815	0.874792	0.112016	7	cis	No
ENSG00000232882	1	ENSG00000232882	91358549	rs78403105	1	90613023	G	A	0.954949	0.012358	0.0193399	0.522832	0.72579	0.209553	0.000533171	0.017027	0.0270964	0.529752	NA	NA	cis	No
ENSG00000187801	1	ZFP69B	40915774	rs75899436	1	41033859	T	C	0.9588	0.0107405	0.0191616	0.575125	0.628546	0.158911	7.642646e-05	0.0170879	0.0307902	0.57891	0.0443074	3	cis	No
ENSG00000163349	1	HIPK1	114471814	rs6699022	1	114109635	T	A	0.851074	-0.0147448	0.00877773	0.092996	-0.333915	0.0790962	2.425409e-05	0.0441573	0.0282919	0.118576	0.911911	4	cis	No
ENSG00000052723	1	SIKE1	115312100	rs12139020	1	115444513	G	A	0.7912	0.00187951	0.00887804	0.832338	-0.380811	0.0877224	1.41777e-05	-0.00493555	0.0233412	0.832535	0.406952	20	cis	No
ENSG00000142686	1	C1orf216	36179476	rs55719198	1	36168179	C	A	0.920635	0.0169198	0.0134761	0.209282	-0.522095	0.0955448	4.644713e-08	-0.0324075	0.0264842	0.221082	0.849012	20	cis	No
ENSG00000049089	1	COL9A2	40766159	rs72944930	1	40778567	C	T	0.954015	-0.00571905	0.0119141	0.63121	-0.466501	0.104819	8.564765e-06	0.0122595	0.0256874	0.63318	0.38553	4	cis	No
ENSG00000116990	1	MYCL	40361098	rs7535397	1	40349410	T	C	0.549837	0.00545333	0.00646525	0.398958	0.331346	0.0683247	1.23722e-06	0.0164581	0.019805	0.405969	0.901012	9	cis	No
ENSG00000158292	1	GPR153	6307406	rs59172575	1	6382842	G	A	0.86648	0.0156959	0.0105347	0.136243	-0.646988	0.0789157	2.434634e-16	-0.02426	0.0165494	0.142672	0.184908	20	cis	No
ENSG00000181218	1	H2AW	228645065	rs78646314	1	227755959	A	G	0.974907	0.00782179	0.0185056	0.672534	1.19141	0.23949	6.532238e-07	0.00656515	0.0155885	0.673643	0.208588	8	cis	No
ENSG00000078618	1	NRDC	52254863	rs6662110	1	52334858	G	A	0.0809991	-0.00958877	0.0135457	0.479019	-0.820641	0.0958714	1.130552e-17	0.0116845	0.0165626	0.480515	0.61552	20	cis	No
ENSG00000224680	1	ENSG00000224680	52834349	rs7524425	1	52152107	G	C	0.839753	0.00937499	0.00906963	0.301291	0.296177	0.0885263	0.000820932	0.0316533	0.0320506	0.323346	NA	NA	cis	No
ENSG00000271420	1	ENSG00000271420	23704873	rs72649467	1	22726371	G	A	0.755252	0.0305966	0.00882417	0.000525585	-0.456517	0.1125	4.951048e-05	-0.0670218	0.0254246	0.00838648	NA	NA	cis	No
ENSG00000215883	1	CYB5RL	54638009	rs140708162	1	54620197	G	A	0.973506	-0.0482856	0.026331	0.0666842	-1.85309	0.204646	1.364378e-19	0.0260568	0.0144977	0.0722868	0.470455	6	cis	No
ENSG00000162458	1	FBLIM1	16083102	rs4661650	1	16116889	C	G	0.121965	0.0107062	0.00880735	0.224139	-0.370105	0.0841472	1.090989e-05	-0.0289275	0.024689	0.241329	0.142319	11	cis	No
ENSG00000236698	1	ENSG00000236698	17012116	rs144654999	1	16758573	C	G	0.965103	0.000572325	0.0208042	0.978053	0.698492	0.154669	6.30099e-06	0.000819372	0.029785	0.978053	0.414295	5	cis	No
ENSG00000177788	1	LOC105373159	229394028	rs72760071	1	230293780	G	A	0.822946	0.0133745	0.00928121	0.149577	0.497813	0.118343	2.593071e-05	0.0268665	0.0197076	0.172802	0.843283	10	cis	No
ENSG00000137970	1	RPL7P9	97144430	rs7545422	1	96687830	A	T	0.870331	-0.00320058	0.0100724	0.750669	-0.441375	0.131869	0.000816671	0.00725139	0.0229231	0.751748	0.732703	3	cis	No
ENSG00000117148	1	ACTL8	18081808	rs4141983	1	18122009	T	C	0.680556	-0.000702048	0.00686656	0.918565	-0.628447	0.0558716	2.367344e-29	0.00111712	0.0109267	0.918568	0.0584479	20	cis	No
ENSG00000183508	1	TENT5C	118148556	rs6669446	1	118223275	T	C	0.569211	-0.0166797	0.0065468	0.0108414	-0.364055	0.0873363	3.067117e-05	0.0458164	0.021076	0.029715	0.290521	11	cis	No
ENSG00000143390	1	RFX5	151313116	rs35118469	1	151185049	C	T	0.824697	-0.00691412	0.00914179	0.449457	0.612823	0.127539	1.547641e-06	-0.0112824	0.0151012	0.45499	0.362567	11	cis	No
ENSG00000230798	1	FOXD3-AS1	63786555	rs115833204	1	64629701	T	C	0.969771	-0.0403519	0.0216484	0.0623266	1.28391	0.291241	1.04133e-05	-0.0314289	0.0183066	0.0860139	0.498135	3	cis	No
ENSG00000162460	1	TMEM82	16068917	rs138370397	1	16106939	C	T	0.982843	-0.0251666	0.0274805	0.359772	-1.25643	0.367777	0.000634824	0.0200302	0.0226441	0.37639	NA	NA	cis	No
ENSG00000116251	1	RPL22	6241329	rs2247392	1	6258147	C	T	0.742647	0.00636013	0.00740813	0.390598	-0.300684	0.0786141	0.000130874	-0.0211522	0.0252506	0.402205	NA	NA	cis	No
ENSG00000227372	1	TP73-AS1	3652548	rs55704710	1	3657783	C	T	0.708917	-0.0117304	0.00745197	0.115456	0.396995	0.0618259	1.352219e-10	-0.029548	0.0193268	0.126298	0.830791	13	cis	No
ENSG00000198912	1	C1orf174	3805689	rs6701422	1	3808171	T	C	0.252101	-0.000885807	0.00732846	0.903792	0.977959	0.053238	2.30272e-75	-0.000905771	0.00749379	0.903794	0.611155	20	cis	No
ENSG00000272088	1	ENSG00000272088	3403810	rs11579276	1	3398984	C	T	0.655462	0.0144761	0.00925834	0.117918	-0.376959	0.100335	0.000171969	-0.0384023	0.0266027	0.148866	NA	NA	cis	No
ENSG00000120942	1	UBIAD1	11333263	rs3765906	1	11347092	T	C	0.959384	-0.0142577	0.0151008	0.345082	-1.29682	0.200135	9.18816e-11	0.0109944	0.0117675	0.350148	0.487567	20	cis	No
ENSG00000230337	1	EXOSC10-AS1	11159732	rs12118686	1	11134594	T	C	0.975724	-0.00476196	0.0152932	0.755514	-0.593165	0.136493	1.387942e-05	0.00802805	0.0258485	0.756119	NA	NA	cis	No
ENSG00000060642	1	PIGV	27113963	rs35161452	1	27018209	A	T	0.913399	-0.0254518	0.0135426	0.0601911	-1.28116	0.0907159	2.749853e-45	0.0198662	0.0106638	0.0624672	0.919889	20	cis	No
ENSG00000126709	1	IFI6	27992572	rs12036532	1	28191932	A	C	0.97409	0.00172398	0.0140784	0.902538	0.78899	0.213482	0.00021918	0.00218505	0.0178534	0.902591	0.219479	3	cis	No
ENSG00000131910	1	NR0B2	27237980	rs56028085	1	27164106	G	A	0.953315	-0.0101586	0.0176741	0.565445	0.579726	0.123268	2.564142e-06	-0.0175231	0.0307138	0.568319	0.398268	5	cis	No
ENSG00000175793	1	SFN	27189633	rs17163904	1	26741106	T	C	0.659314	-0.000248622	0.00706047	0.97191	-0.330355	0.073406	6.783204e-06	0.00075259	0.021373	0.971911	NA	NA	cis	No
ENSG00000260063	1	LOC101928728	27018623	rs71636769	1	27020591	T	C	0.915733	-0.0266233	0.013595	0.050193	-0.60528	0.102911	4.063615e-09	0.0439851	0.023673	0.0631646	0.702726	13	cis	No
ENSG00000121775	1	TMEM39B	32537632	rs10798888	1	32199099	G	T	0.831116	-0.010334	0.00841676	0.219528	-0.423687	0.113059	0.000178622	0.0243906	0.0209045	0.243306	0.560157	4	cis	No
ENSG00000160051	1	IQCC	32671236	rs79159565	1	32337534	A	G	0.977824	-0.032909	0.0308853	0.286639	-1.16952	0.293517	6.762015e-05	0.0281389	0.0273365	0.303314	NA	NA	cis	No
ENSG00000188910	1	GJB3	35246790	rs1741969	1	35256125	A	G	0.353175	0.0121019	0.00682677	0.0762754	0.415862	0.0588905	1.645729e-12	0.0291008	0.0169253	0.0855481	0.0688017	12	cis	No
ENSG00000163874	1	ZC3H12A	37940153	rs215831	1	37653384	C	T	0.390406	-0.00896889	0.00707825	0.205118	-0.378218	0.096751	9.260625e-05	0.0237135	0.0196733	0.228062	0.160904	3	cis	No
ENSG00000065978	1	YBX1	43148098	rs16830421	1	43616646	C	T	0.960784	-0.00167831	0.0183066	0.926954	0.69683	0.17929	0.000101654	-0.00240849	0.0262786	0.926974	0.830704	11	cis	No
ENSG00000171793	1	CTPS1	41445007	rs2483690	1	41970103	C	G	0.332283	0.00308495	0.00740042	0.67678	0.350778	0.102017	0.000585118	0.00879459	0.0212516	0.678998	NA	NA	cis	No
ENSG00000117425	1	PTCH2	45285516	rs6429645	1	44500524	G	C	0.835784	0.00261363	0.00947543	0.782677	-0.495892	0.137835	0.000321015	-0.00527056	0.0191639	0.783297	0.646511	3	cis	No
ENSG00000142973	1	CYP4B1	47223510	rs4646483	1	47277217	C	T	0.858894	-0.00537491	0.00842088	0.523289	-0.705376	0.0933498	4.147955e-14	0.00761992	0.0119807	0.524764	0.0723844	20	cis	No
ENSG00000224986	1	PPP1R8P1	48790752	rs2105253	1	48317806	A	G	0.618464	0.00125254	0.00671996	0.852138	0.278524	0.0751777	0.000211493	0.00449706	0.0241576	0.852323	NA	NA	cis	No
ENSG00000162402	1	USP24	55532032	rs1752394	1	55538903	A	G	0.208333	0.00257151	0.00870611	0.767712	0.547297	0.0799097	7.439804e-12	0.00469856	0.0159223	0.767922	0.590266	20	cis	No
ENSG00000116133	1	DHCR24	55315306	rs140194495	1	55902372	G	A	0.975023	-0.0048367	0.023686	0.838197	-1.27583	0.243801	1.667118e-07	0.00379102	0.0185793	0.838318	0.50552	8	cis	No
ENSG00000134709	1	HOOK1	60280458	rs12076674	1	59908716	T	A	0.846055	-0.0255018	0.0099574	0.0104344	-0.532997	0.12333	1.548289e-05	0.047846	0.021716	0.027576	NA	NA	cis	No
ENSG00000226476	1	LINC01748	61005921	rs76226595	1	61233699	G	A	0.885971	0.0299255	0.0119197	0.0120528	-0.419792	0.107729	9.749664e-05	-0.0712865	0.0337772	0.0348163	0.84589	3	cis	No
ENSG00000162604	1	TM2D1	62146718	rs17312971	1	62189541	T	C	0.762372	-0.00657349	0.00834543	0.430886	0.532618	0.0698859	2.512293e-14	-0.0123418	0.0157522	0.433332	0.897474	8	cis	No
ENSG00000162599	1	NFIA	61330931	rs143132954	1	61322867	T	C	0.983077	-0.0405867	0.0300032	0.176137	-1.08964	0.246003	9.450819e-06	0.0372478	0.0287905	0.19575	NA	NA	cis	No
ENSG00000203965	1	EFCAB7	63989043	rs9659335	1	63935003	T	A	0.46697	0.0145215	0.0106575	0.173022	0.27749	0.0730243	0.000144714	0.0523316	0.0408012	0.199632	0.614096	5	cis	No
ENSG00000172410	1	INSL5	67263424	rs9659943	1	66493534	C	A	0.644958	0.000582217	0.00671173	0.930873	-0.337563	0.0972506	0.000518402	-0.00172477	0.0198891	0.930895	NA	NA	cis	No
ENSG00000171517	1	LPAR3	85277285	rs35873057	1	85380183	C	T	0.716503	0.0121086	0.00718726	0.0920393	0.321277	0.0648792	7.34839e-07	0.037689	0.0236302	0.110723	0.0968035	9	cis	No
ENSG00000203943	1	SAMD13	84764049	rs78535547	1	85551079	G	A	0.996615	4.23063e-05	0.0272893	0.998763	1.74386	0.428374	4.683489e-05	2.42601e-05	0.0156488	0.998763	NA	NA	cis	No
ENSG00000142867	1	BCL10	85731931	rs11161574	1	85727044	T	C	0.221289	0.00306183	0.00746343	0.681626	0.512172	0.103502	7.481887e-07	0.00597813	0.0146221	0.682656	0.640279	14	cis	No
ENSG00000016490	1	CLCA1	86934051	rs768610	1	86771034	C	A	0.704599	-0.0024736	0.00682271	0.716938	-0.401851	0.0980165	4.134519e-05	0.00615552	0.0170445	0.717991	0.689346	12	cis	No
ENSG00000143013	1	LMO4	87794151	rs140869353	1	87661075	T	C	0.956116	-0.0101061	0.0211763	0.633193	0.734291	0.156478	2.697331e-06	-0.0137631	0.0289879	0.634938	0.486969	4	cis	No
ENSG00000207523	1	SNORA66	93306276	rs114605880	1	92579651	T	C	0.987162	-0.011348	0.0323864	0.726044	-1.25572	0.347317	0.000299782	0.00903705	0.0259119	0.72727	NA	NA	cis	No
ENSG00000233184	1	LOC102606465	101491434	rs2988395	1	100932506	G	C	0.996965	0.0145315	0.0228068	0.524021	0.738905	0.18527	6.656171e-05	0.0196663	0.0312571	0.529233	NA	NA	cis	No
ENSG00000183298	1	RPSAP19	102251892	rs7538660	1	101833755	A	T	0.951914	-0.0156401	0.0132357	0.237339	-0.576246	0.154134	0.000185038	0.0271414	0.0240888	0.259861	NA	NA	cis	No
ENSG00000134215	1	VAV3	108113782	rs2149179	1	108099890	G	A	0.60049	0.0137206	0.00658975	0.0373317	-0.364548	0.0573068	2.00008e-10	-0.0376373	0.0190201	0.047837	0.139258	20	cis	No
ENSG00000196427	1	NBPF4	108765963	rs2804260	1	109046211	T	C	0.185574	-0.0111643	0.0105077	0.288013	0.418099	0.0784759	9.944487e-08	-0.0267025	0.025627	0.297426	0.550317	13	cis	No
ENSG00000162636	1	FAM102B	109102711	rs148206901	1	109190198	C	G	0.981793	0.0276211	0.0267635	0.302052	1.42379	0.242959	4.623017e-09	0.0193997	0.0190866	0.309438	0.647709	7	cis	No
ENSG00000215717	1	TMEM167B	109632425	rs616378	1	109634341	C	T	0.837302	0.0110287	0.00945715	0.243545	-0.621768	0.0714787	3.358806e-18	-0.0177376	0.0153462	0.247749	0.479672	15	cis	No
ENSG00000031698	1	SARS1	109756540	rs4970829	1	109757295	G	A	0.926237	0.00452915	0.0144781	0.754412	0.971406	0.198298	9.64646e-07	0.00466247	0.0149346	0.754895	0.722175	6	cis	No
ENSG00000273382	1	ENSG00000273382	109630593	rs521734	1	109633256	C	G	0.629085	-0.00303989	0.00743759	0.682745	0.434466	0.0552416	3.695735e-15	-0.00699684	0.017142	0.68315	0.250809	20	cis	No
ENSG00000134248	1	LAMTOR5	110943871	rs12127781	1	110936557	T	C	0.870915	-0.0089933	0.0105441	0.393702	0.770535	0.149005	2.325732e-07	-0.0116715	0.013869	0.400039	0.541816	11	cis	No
ENSG00000224965	1	ENSG00000224965	110751456	rs60822075	1	110781200	A	G	0.987628	0.00210651	0.0180179	0.90693	-0.872338	0.228448	0.000134242	-0.00241479	0.0206644	0.906973	NA	NA	cis	No
ENSG00000258634	1	ENSG00000258634	110600962	rs638372	1	110674457	A	G	0.784294	-0.00772328	0.00955292	0.418818	0.486676	0.105413	3.896458e-06	-0.0158694	0.0199276	0.425826	NA	NA	cis	No
ENSG00000064886	1	CHI3L2	111743393	rs10857859	1	111733724	G	C	0.66655	-0.0258226	0.00686508	0.000168932	0.304109	0.0607797	5.630984e-07	-0.0849123	0.028242	0.00264187	0.0112112	11	cis	No
ENSG00000243960	1	ENSG00000243960	111981260	rs1361135	1	112026954	C	T	0.412348	-0.00716096	0.00666276	0.282476	-0.371269	0.0953795	9.91989e-05	0.0192878	0.0186174	0.300198	NA	NA	cis	No
ENSG00000273483	1	ENSG00000273483	113060421	rs78311596	1	113300945	A	T	0.979575	-0.0147658	0.0293984	0.615481	-1.1709	0.328055	0.000358052	0.0126106	0.0253549	0.618932	NA	NA	cis	No
ENSG00000173212	1	MAB21L3	116654376	rs72693722	1	116697622	G	T	0.929855	0.0191894	0.013438	0.153293	0.623384	0.156783	7.005957e-05	0.0307826	0.0229046	0.178965	0.0698292	6	cis	No
ENSG00000134193	1	REG4	120336641	rs2994822	1	120384785	C	A	0.20063	0.00855986	0.00758067	0.258826	-0.548407	0.103239	1.08423e-07	-0.0156086	0.0141319	0.26938	0.932713	5	cis	No
ENSG00000223345	1	ENSG00000223345	120906028	rs11249430	1	121288913	C	G	0.487395	-0.000152669	0.0079134	0.984608	0.580421	0.0667799	3.575385e-18	-0.000263032	0.0136339	0.984608	0.718875	14	cis	No
ENSG00000178104	1	PDE4DIP	144836157	rs6683142	1	147304355	C	T	0.570495	0.00515057	0.00651553	0.429232	-0.217957	0.071556	0.00231935	-0.0236311	0.030884	0.444177	NA	NA	cis	No
ENSG00000023902	1	PLEKHO1	150121373	rs72692823	1	149910775	T	C	0.854925	0.00561507	0.0083267	0.500092	-0.363014	0.103552	0.000455522	-0.0154679	0.0233582	0.50784	0.98707	3	cis	No
ENSG00000136631	1	VPS45	150039369	rs72692854	1	149998923	G	T	0.850373	0.0244927	0.0112667	0.0297121	0.441327	0.128901	0.000617617	0.0554979	0.0302405	0.0664739	NA	NA	cis	No
ENSG00000143543	1	JTB	153946745	rs6427741	1	154535817	A	C	0.910598	-0.0122828	0.0110331	0.265595	-0.631909	0.164839	0.000126336	0.0194376	0.0181813	0.285025	0.522884	6	cis	No
ENSG00000116580	1	GON4L	155719508	rs7520623	1	156362411	C	T	0.887955	-0.00269859	0.00876131	0.758073	0.412517	0.112561	0.000247504	-0.00654177	0.0213135	0.758897	NA	NA	cis	No
ENSG00000160818	1	GPATCH4	156564279	rs3795733	1	156564922	C	T	0.277544	-0.0151658	0.00697538	0.0296914	0.271753	0.0618737	1.122819e-05	-0.0558073	0.0286409	0.0513534	0.0110261	11	cis	No
ENSG00000163468	1	CCT3	156278759	rs11264468	1	156274585	C	G	0.720355	-0.00170354	0.00714606	0.81158	-0.516357	0.0607549	1.911946e-17	0.00329915	0.0138448	0.811652	0.130987	15	cis	No
ENSG00000163472	1	TMEM79	156252726	rs58390527	1	156334116	C	T	0.718838	-0.00347478	0.00738123	0.637813	0.332592	0.0803053	3.448959e-05	-0.0104476	0.022336	0.639965	0.131836	5	cis	No
ENSG00000224259	1	LINC01133	159931008	rs113609298	1	159950543	T	C	0.798203	-0.00124243	0.00922753	0.892894	-0.617041	0.082193	6.039532e-14	0.00201353	0.0149569	0.892911	0.46055	17	cis	No
ENSG00000158859	1	ADAMTS4	161154098	rs113625742	1	160627411	G	A	0.978408	0.0397592	0.0317589	0.210604	1.36943	0.321281	2.022342e-05	0.0290334	0.0241709	0.229685	NA	NA	cis	No
ENSG00000158850	1	B4GALT3	161141100	rs4540676	1	161104124	G	A	0.732843	0.00233874	0.00700604	0.738517	-0.29128	0.0679942	1.836501e-05	-0.00802918	0.0241255	0.739279	0.251274	3	cis	No
ENSG00000143224	1	PPOX	161136200	rs7544090	1	161137458	G	A	0.918534	0.0148724	0.0125603	0.236379	-0.442384	0.101135	1.21888e-05	-0.0336188	0.0294142	0.253062	0.261609	3	cis	No
ENSG00000158882	1	TOMM40L	161195793	rs4233368	1	161197244	C	A	0.745798	-0.0118332	0.00715277	0.0980555	-0.531469	0.0990777	8.132505e-08	0.0222651	0.014084	0.113906	0.438998	11	cis	No
ENSG00000158869	1	FCER1G	161185024	rs2070902	1	161187665	C	T	0.743231	-0.0177816	0.00717934	0.0132576	0.409207	0.0610115	1.986055e-11	-0.0434538	0.0187026	0.0201568	0.237167	17	cis	No
ENSG00000076258	1	FMO4	171283347	rs141285134	1	171283193	A	G	0.976074	0.0151388	0.0281847	0.591178	0.924088	0.167693	3.576235e-08	0.0163824	0.0306446	0.59293	0.528237	3	cis	No
ENSG00000116183	1	PAPPA2	176432307	rs79835160	1	175546062	T	A	0.934641	0.0037785	0.01613	0.814789	-0.683685	0.18388	0.000200718	-0.00552667	0.0236395	0.815149	NA	NA	cis	No
ENSG00000116260	1	QSOX1	180123969	rs147903772	1	180222914	G	A	0.975724	-0.0456607	0.0284054	0.107953	1.17982	0.272331	1.475572e-05	-0.0387014	0.0256799	0.131793	NA	NA	cis	No
ENSG00000135829	1	DHX9	182808504	rs34232349	1	183675576	C	T	0.977358	0.0135344	0.0283615	0.633213	1.25786	0.343525	0.000250615	0.0107599	0.0227381	0.636065	NA	NA	cis	No
ENSG00000116698	1	SMG7	183441351	rs2275676	1	183430822	C	G	0.370798	0.000759757	0.0065853	0.908151	0.34847	0.0731073	1.873991e-06	0.00218027	0.0189033	0.908177	0.203947	15	cis	No
ENSG00000151414	1	NEK7	198126093	rs12409964	1	198153564	G	T	0.893324	-0.00331631	0.0101666	0.744276	-0.435414	0.11525	0.000158106	0.00761645	0.0234361	0.745191	0.682785	7	cis	No
ENSG00000203724	1	C1orf53	197871777	rs4539165	1	197872019	G	T	0.729458	0.00360184	0.00865801	0.677401	-0.558509	0.0790286	1.581233e-12	-0.00644903	0.0155288	0.677927	0.695653	6	cis	No
ENSG00000163435	1	ELF3	201977073	rs6663263	1	200980721	G	A	0.875233	0.00719137	0.00978457	0.462358	0.56892	0.152081	0.000183354	0.0126404	0.0175273	0.470797	0.171565	6	cis	No
ENSG00000159348	1	CYB5R1	202930997	rs10920530	1	202902754	A	G	0.403711	0.00576609	0.00705086	0.413479	0.435297	0.090763	1.618859e-06	0.0132463	0.0164316	0.420156	0.282127	15	cis	No
ENSG00000133063	1	CHIT1	203181955	rs2486959	1	203189634	A	G	0.820728	0.0108529	0.00779676	0.163931	-0.494122	0.108567	5.330922e-06	-0.021964	0.0165005	0.183152	0.734946	6	cis	No
ENSG00000069275	1	NUCKS1	205681947	rs823143	1	205743425	A	C	0.565009	-0.0201036	0.00740519	0.0066316	-0.383341	0.0550074	3.19425e-12	0.0524431	0.0207315	0.0114182	0.683269	20	cis	No
ENSG00000143486	1	EIF2D	206744620	rs6701984	1	206777490	A	C	0.569444	0.00544575	0.00651376	0.403134	0.476872	0.0542787	1.554957e-18	0.0114197	0.0137211	0.405252	0.508781	14	cis	No
ENSG00000158715	1	SLC45A3	205626979	rs823106	1	205656453	G	C	0.121965	0.00859967	0.0082388	0.296577	0.539114	0.0704024	1.894215e-14	0.0159515	0.0154234	0.301025	0.0586	20	cis	No
ENSG00000136634	1	IL10	206940947	rs11120172	1	207259272	A	G	0.993042	0.0144786	0.0205846	0.481827	-0.737455	0.222841	0.000935181	-0.0196332	0.0285365	0.491451	NA	NA	cis	No
ENSG00000170385	1	SLC30A1	211744910	rs7527404	1	211667884	G	T	0.923086	-0.00987851	0.0103258	0.338726	-0.450114	0.111845	5.711208e-05	0.0219467	0.0235797	0.351985	0.948102	11	cis	No
ENSG00000229832	1	ENSG00000229832	212530760	rs11119936	1	212609001	C	G	0.89881	0.00770377	0.00928006	0.406458	0.404098	0.0941543	1.771739e-05	0.0190641	0.0233905	0.415052	NA	NA	cis	No
ENSG00000130770	1	ATP5IF1	28562620	rs12121731	1	28553997	G	A	0.742297	-0.000374908	0.00793855	0.962333	0.527436	0.0975735	6.461972e-08	-0.000710812	0.0150518	0.962334	0.876808	10	cis	No
ENSG00000186205	1	MTARC1	220960101	rs1874121	1	220969049	C	T	0.667992	-0.0156528	0.00686083	0.02252	0.583665	0.0535831	1.248838e-27	-0.0268181	0.0120098	0.0255477	0.146738	13	cis	No
ENSG00000136630	1	HLX	221051699	rs17010629	1	221895393	T	C	0.456116	0.00107508	0.0065412	0.869451	-0.387856	0.0993411	9.450446e-05	-0.00277185	0.01688	0.869566	0.00886011	6	cis	No
ENSG00000117791	1	MTARC2	220921567	rs10863533	1	220353631	T	C	0.778011	-0.0115561	0.00763726	0.13025	-0.353133	0.0673388	1.5703e-07	0.0327245	0.0225094	0.145998	0.0568865	10	cis	No
ENSG00000162819	1	BROX	222885895	rs1986348	1	222905777	C	T	0.972689	0.0139885	0.0150951	0.354089	1.63102	0.164815	4.330569e-23	0.00857654	0.0092955	0.356187	0.0711924	12	cis	No
ENSG00000197520	1	FAM177B	222910549	rs35976854	1	222950119	G	A	0.240079	-0.0158547	0.00810958	0.0505756	0.324404	0.0789388	3.964117e-05	-0.0488733	0.0276831	0.0774869	0.51105	6	cis	No
ENSG00000143502	1	SUSD4	223394161	rs35973928	1	223818819	T	C	0.296685	-0.0115494	0.00721877	0.109619	0.349813	0.0965236	0.00028995	-0.0330159	0.0225575	0.143294	NA	NA	cis	No
ENSG00000143751	1	SDE2	226170403	rs56301120	1	226032018	G	A	0.911064	0.00372473	0.0106463	0.726443	0.494059	0.135323	0.000261251	0.00753904	0.0216474	0.72764	NA	NA	cis	No
ENSG00000143772	1	ITPKB	226819391	rs12738352	1	226977944	T	C	0.371265	-0.00063902	0.00666959	0.923671	0.410772	0.0950361	1.544289e-05	-0.00155566	0.0162407	0.923689	0.300992	7	cis	No
ENSG00000143819	1	EPHX1	225997794	rs2854462	1	226018135	C	T	0.435107	0.00787664	0.00658656	0.231749	0.275527	0.0580178	2.044181e-06	0.0285875	0.0246516	0.246186	0.358681	9	cis	No
ENSG00000135744	1	AGT	230838269	rs2493128	1	230832431	G	T	0.401261	-0.00185313	0.00688279	0.787744	-0.545147	0.0539172	4.946973e-24	0.00339932	0.01263	0.787818	0.530203	20	cis	No
ENSG00000143641	1	GALNT2	230193536	rs75420491	1	230275677	C	T	0.808007	0.00241703	0.00979081	0.805011	0.655264	0.103133	2.103567e-10	0.00368864	0.0149531	0.805155	0.577062	6	cis	No
ENSG00000135773	1	CAPN9	230883130	rs12082061	1	230924905	C	T	0.771359	0.000748089	0.00783545	0.923938	-0.696842	0.0586494	1.477241e-32	-0.00107354	0.0112446	0.92394	0.107269	20	cis	No
ENSG00000116962	1	NID1	236139130	rs4660148	1	236199019	G	T	0.675537	7.83328e-05	0.00693922	0.990993	-0.252249	0.0606042	3.151449e-05	-0.000310538	0.0275095	0.990993	0.715827	4	cis	No
ENSG00000130939	1	UBE4B	10092890	rs61783491	1	9359801	G	T	0.830999	0.013892	0.0101785	0.172304	-0.359539	0.0962526	0.000187441	-0.0386384	0.0301404	0.199862	NA	NA	cis	No
ENSG00000142875	1	PRKACB	84543745	rs41300496	1	84608438	A	G	0.866363	0.00564267	0.0116819	0.629078	-0.374078	0.0892267	2.759661e-05	-0.0150842	0.0314351	0.631332	0.309766	4	cis	No
ENSG00000154451	1	GBP5	89724633	rs56069047	1	89742517	C	T	0.454132	-0.0155365	0.00685996	0.0235248	-0.300155	0.0561497	9.010736e-08	0.0517616	0.0248213	0.037036	0.321132	11	cis	No
ENSG00000116237	1	ICMT	6281253	rs12073932	1	6293890	G	A	0.960784	0.0453976	0.0178032	0.0107734	-1.42033	0.102426	1.006008e-43	-0.0319627	0.0127447	0.0121445	0.258479	20	cis	No
ENSG00000169213	1	RAB3B	52373628	rs35728568	1	52341507	G	A	0.661765	-0.000156879	0.00764643	0.983631	0.264448	0.0597323	9.54569e-06	-0.000593232	0.028915	0.983631	0.872777	20	cis	No
ENSG00000228589	1	ENSG00000228589	28421582	rs146346528	1	27650591	C	T	0.964052	-0.0104595	0.0226449	0.644158	-0.816015	0.223984	0.000269287	0.0128178	0.0279727	0.646791	0.865549	3	cis	No
ENSG00000142676	1	RPL11	24018269	rs186953429	1	24015769	G	A	0.821074	0.0176031	0.0111627	0.114805	-0.36293	0.0813067	8.055047e-06	-0.0485027	0.0326201	0.137042	0.226059	8	cis	No
ENSG00000272432	1	ENSG00000272432	25574328	rs75133012	1	26020583	G	A	0.981909	-0.0367059	0.0350799	0.2954	1.15993	0.293697	7.834366e-05	-0.0316449	0.0312865	0.311799	NA	NA	cis	No
ENSG00000224014	1	ENSG00000224014	247338558	rs11588486	1	247362282	C	T	0.846405	-0.00675113	0.00954193	0.479242	0.678838	0.0997511	1.008237e-11	-0.00994513	0.014132	0.481601	0.281873	12	cis	No
ENSG00000157978	1	LDLRAP1	25870071	rs3856240	1	25892525	T	C	0.5419	-0.00462734	0.00654792	0.47976	0.539909	0.0545971	4.648188e-23	-0.00857059	0.0121587	0.480878	0.761405	10	cis	No
ENSG00000116815	1	CD58	117057157	rs61787814	1	117324786	G	A	0.795868	0.00267529	0.0102823	0.794722	-0.319719	0.088504	0.000303282	-0.00836763	0.0322437	0.79524	NA	NA	cis	No
ENSG00000270115	1	ENSG00000270115	33726813	rs55948140	1	34429821	C	T	0.96557	-0.0111394	0.0136534	0.414574	-0.68008	0.196867	0.000551294	0.0163795	0.0206285	0.427181	NA	NA	cis	No
ENSG00000176261	1	ZBTB8OS	33065773	rs146315331	1	32916145	G	A	0.94141	0.000966596	0.0173701	0.955623	0.679664	0.185184	0.000242346	0.00142217	0.0255598	0.955628	0.896938	3	cis	No
ENSG00000203667	1	COX20	244998624	rs10927331	1	244999396	G	A	0.854692	-0.00466389	0.0105595	0.658724	0.408084	0.0968879	2.532098e-05	-0.0114287	0.0260177	0.660467	0.390055	6	cis	No
ENSG00000162702	1	ZNF281	200374068	rs10919731	1	199600636	A	G	0.631419	0.00626821	0.00727541	0.388929	-0.36055	0.0981923	0.000240777	-0.0173851	0.0207267	0.401592	0.246354	3	cis	No
ENSG00000122406	1	RPL5	93297582	rs753391	1	93460088	G	A	0.532096	-0.0164426	0.00667099	0.0137093	0.305431	0.0689969	9.566916e-06	-0.0538341	0.0249986	0.031281	0.369934	7	cis	No
ENSG00000261664	1	TTC39A-AS1	51795326	rs76984936	1	51797862	C	T	0.951214	0.020562	0.0165489	0.21405	0.626348	0.141154	9.108402e-06	0.0328284	0.0274375	0.23151	0.614264	10	cis	No
ENSG00000203288	1	TDRKH-AS1	151763280	rs6659705	1	151769750	T	C	0.844771	-0.000980796	0.00923425	0.915413	-0.473137	0.0740345	1.650563e-10	0.00207296	0.0195198	0.915425	0.438439	14	cis	No
ENSG00000168118	1	RAB4A	229406822	rs237825	1	229453540	G	A	0.330415	-0.000862837	0.0066454	0.896693	-0.398484	0.0770837	2.347211e-07	0.0021653	0.016682	0.896726	0.304538	8	cis	No
ENSG00000079277	1	MKNK1	47023090	rs7556481	1	47063085	C	T	0.743931	0.00271223	0.00732218	0.711075	0.497674	0.0643391	1.032601e-14	0.00544981	0.0147297	0.711391	0.0409467	19	cis	No
ENSG00000163866	1	SMIM12	35178338	rs11803179	1	35311455	G	A	0.626984	-0.00799119	0.00759142	0.292497	0.47422	0.0552483	9.208374e-18	-0.0168512	0.0161282	0.2961	0.545843	12	cis	No
ENSG00000009780	1	FAM76A	28052490	rs114456009	1	28729526	C	T	0.896825	0.0143618	0.0138167	0.298594	0.523845	0.129106	4.960307e-05	0.0274161	0.0272273	0.313966	0.610623	6	cis	No
ENSG00000117592	1	PRDX6	173446405	rs61826753	1	173429735	G	A	0.856793	-0.010194	0.00831336	0.220118	-0.572414	0.129021	9.13907e-06	0.0178088	0.0150678	0.237243	0.684928	13	cis	No
ENSG00000203739	1	PRDX6-AS1	173386932	rs12027531	1	173535122	T	C	0.830766	-0.0145006	0.00799313	0.0696567	-0.422209	0.0956661	1.01779e-05	0.0343446	0.0204687	0.0933651	0.671316	12	cis	No
ENSG00000162687	1	KCNT2	196194909	rs116318443	1	196733306	C	T	0.988072	-0.0877855	0.0341853	0.0102308	1.12783	0.29429	0.000126911	-0.0778358	0.0364861	0.0329002	0.708136	4	cis	No
ENSG00000169241	1	SLC50A1	155107820	rs1395562	1	154769174	C	T	0.834851	0.00723437	0.0102911	0.482073	0.476321	0.119781	6.991176e-05	0.015188	0.0219404	0.488787	NA	NA	cis	No
ENSG00000134698	1	AGO4	36273773	rs76870230	1	36209536	T	C	0.952498	-0.00620784	0.0149843	0.678663	0.801898	0.235785	0.000671455	-0.00774143	0.0188242	0.68089	NA	NA	cis	No
ENSG00000142661	1	MYOM3	24382525	rs4648933	1	24435434	C	A	0.656162	-0.0186841	0.00697924	0.00742645	-0.34815	0.0703022	7.338152e-07	0.0536668	0.0227883	0.0185221	0.548165	13	cis	No
ENSG00000143546	1	S100A8	153362508	rs72633650	1	154360838	T	C	0.852591	-0.0188047	0.00915565	0.0399865	-0.377455	0.105801	0.000360268	0.0498197	0.0279888	0.0750782	0.593376	4	cis	No
ENSG00000143549	1	TPM3	154127784	rs7521837	1	154252860	T	C	0.761555	-0.0053057	0.00830568	0.522951	-0.416437	0.0933797	8.210935e-06	0.0127407	0.0201482	0.527159	0.521221	10	cis	No
ENSG00000214796	1	ENSG00000214796	202820956	rs10800873	1	202835018	C	A	0.589869	-0.00152904	0.0069779	0.826552	-0.359333	0.0552583	7.884191e-11	0.00425522	0.0194301	0.826649	0.307508	8	cis	No
ENSG00000162572	1	SCNN1D	1215816	rs1262893	1	1216581	G	C	0.979458	0.0452551	0.0177611	0.0108345	-0.815592	0.188569	1.524159e-05	-0.0554874	0.0252748	0.0281376	0.329209	4	cis	No
ENSG00000228175	1	ENSG00000228175	90459152	rs2783647	1	91288423	C	T	0.943161	-0.00581008	0.0106474	0.585285	0.948724	0.255026	0.000199139	-0.0061241	0.011343	0.589264	NA	NA	cis	No
ENSG00000156171	1	DRAM2	111659955	rs3762374	1	111682118	C	T	0.70845	-0.0177121	0.00707136	0.0122533	0.951638	0.0491286	1.373231e-83	-0.0186122	0.00749259	0.0129885	0.215423	20	cis	No
ENSG00000058668	1	ATP2B4	203595689	rs4414100	1	204001183	G	A	0.076564	-0.0101984	0.0128581	0.427691	0.573405	0.14111	4.833567e-05	-0.0177857	0.0228473	0.436298	0.846178	4	cis	No
ENSG00000183814	1	LIN9	226418850	rs729561	1	226622221	A	G	0.507353	-0.00362284	0.00686063	0.597456	0.258973	0.0575292	6.744608e-06	-0.0139893	0.0266733	0.599954	0.146923	8	cis	No
ENSG00000177301	1	KCNA2	111136202	rs4970774	1	110268828	A	C	0.544001	-0.000111548	0.00657403	0.986462	-0.427213	0.0933919	4.77555e-06	0.000261106	0.0153883	0.986462	0.386966	6	cis	No
ENSG00000123836	1	PFKFB2	207222801	rs12403925	1	207212962	C	A	0.862278	0.00155523	0.0100411	0.876911	-0.68299	0.0837247	3.418328e-16	-0.00227709	0.0147043	0.876933	0.127229	7	cis	No
ENSG00000214837	1	LINC01347	243242159	rs11583693	1	243130993	A	G	0.306163	-0.00332238	0.0116526	0.775553	-0.45483	0.0587009	9.316015e-15	0.00730466	0.025637	0.775701	0.435376	19	cis	No
ENSG00000117155	1	SSX2IP	85109390	rs962409	1	85732941	A	C	0.525794	-0.00931854	0.00638791	0.144626	0.258358	0.0728806	0.000392687	-0.0360683	0.0267367	0.17733	0.550003	4	cis	No
ENSG00000272482	1	ENSG00000272482	12678906	rs28551666	1	12401868	A	C	0.198646	-0.00465124	0.00976254	0.633763	-0.290126	0.0879053	0.000965334	0.0160318	0.0339981	0.637248	NA	NA	cis	No
ENSG00000177674	1	AGTRAP	11796141	rs74541046	1	11790925	C	T	0.714169	-0.000432326	0.00763105	0.954821	-0.544792	0.0999275	4.984182e-08	0.000793562	0.014008	0.954824	0.660737	8	cis	No
ENSG00000261798	1	LOC101929536	40254648	rs11206724	1	40200894	C	A	0.618931	0.0167248	0.00707503	0.0180827	-0.437502	0.0939508	3.212999e-06	-0.0382279	0.0181358	0.0350418	0.52941	12	cis	No
ENSG00000116918	1	TSNAX	231664399	rs11122313	1	231730254	G	T	0.732493	0.0135275	0.00762819	0.0761688	0.373623	0.0991379	0.000164086	0.0362063	0.0225642	0.108584	0.825713	10	cis	No
ENSG00000203859	1	HSD3B2	119957554	rs58498757	1	119979924	G	A	0.965336	0.0119056	0.0116935	0.308609	0.949118	0.135906	2.876679e-12	0.0125439	0.0124506	0.3137	0.771996	20	cis	No
ENSG00000143067	1	ZNF697	120162045	rs12129705	1	120191044	A	T	0.876517	-0.0136714	0.0111804	0.221402	-0.635744	0.118563	8.227652e-08	0.0215046	0.0180378	0.233185	0.879629	9	cis	No
ENSG00000231615	1	LOC646870	173331536	rs139867686	1	173368206	G	A	0.987512	0.032007	0.03966	0.419647	1.12793	0.311502	0.000293541	0.0283768	0.0360245	0.430868	NA	NA	cis	No
ENSG00000116663	1	FBXO6	11724181	rs3125816	1	11718195	A	G	0.7919	-0.00926241	0.00859185	0.281013	-0.560548	0.0697571	9.303498e-16	0.0165238	0.0154649	0.285307	0.357341	19	cis	No
ENSG00000143742	1	SRP9	225965531	rs11588167	1	225995637	G	A	0.885154	-0.0136321	0.00974239	0.161737	0.828952	0.144029	8.64143e-09	-0.016445	0.012095	0.17394	0.0744639	20	cis	No
ENSG00000188460	1	ENSG00000188460	224051428	rs10916629	1	224704913	A	C	0.8331	-0.00167255	0.0090206	0.852904	0.341331	0.0985749	0.000534868	-0.00490008	0.0264656	0.853112	NA	NA	cis	No
ENSG00000162607	1	USP1	62901968	rs7534949	1	62038777	G	C	0.394841	0.00542202	0.00655014	0.4078	0.380486	0.0976787	9.808409e-05	0.0142502	0.0175996	0.418118	0.221864	7	cis	No
ENSG00000158769	1	F11R	160965001	rs113367426	1	160589456	C	T	0.983427	0.0461584	0.0253955	0.0691284	1.33309	0.342178	9.783762e-05	0.0346251	0.0210213	0.0995286	0.38401	5	cis	No
ENSG00000117614	1	SYF2	25549170	rs367629	1	25315977	A	G	0.730626	-0.000885819	0.00825631	0.914559	0.376419	0.100648	0.00018405	-0.00235328	0.0219429	0.914594	NA	NA	cis	No
ENSG00000137941	1	TTLL7	84330711	rs61766872	1	84396259	A	G	0.880019	0.0243405	0.0105877	0.0215087	0.580277	0.151239	0.000124635	0.0419463	0.0212705	0.048605	0.0886858	3	cis	No
ENSG00000116586	1	LAMTOR2	156024543	rs3748564	1	156415481	T	C	0.97479	-0.018939	0.0184922	0.305758	-0.645445	0.152525	2.319001e-05	0.0293425	0.0294774	0.31953	0.299267	4	cis	No
ENSG00000243749	1	TMEM35B	35447136	rs12043879	1	34686130	A	C	0.79155	-0.00678263	0.0076947	0.378064	0.359392	0.109814	0.00106516	-0.0188725	0.0221733	0.394694	NA	NA	cis	No
ENSG00000133019	1	CHRM3	239549865	rs78823306	1	239199452	T	C	0.979692	0.0051461	0.0286486	0.857444	-1.04613	0.238583	1.161122e-05	-0.00491918	0.0274083	0.857563	NA	NA	cis	No
ENSG00000171943	1	SRGAP2C	121107124	rs12133524	1	121141155	G	C	0.387674	-0.0218326	0.0150464	0.146774	-0.624046	0.0540046	6.93098e-31	0.0349856	0.0243004	0.149949	0.0934692	14	cis	No
ENSG00000226067	1	ENSG00000226067	149284645	rs146784183	1	121223447	A	G	0.0984095	0.015095	0.0244256	0.536576	-0.637727	0.123883	2.635367e-07	-0.02367	0.038576	0.539484	NA	NA	cis	No
ENSG00000197245	1	FAM110D	26485511	rs2152384	1	26493787	A	G	0.371615	-0.00807095	0.0072193	0.263581	0.388584	0.056139	4.458927e-12	-0.0207702	0.0188192	0.269738	0.0836446	20	cis	No
ENSG00000085831	1	TTC39A	51752930	rs72906173	1	51789694	T	G	0.893441	0.00925813	0.0101227	0.360407	0.750022	0.132564	1.533183e-08	0.0123438	0.0136717	0.366595	0.425881	20	cis	No
ENSG00000143322	1	ABL2	179068462	rs10913689	1	179040930	T	C	0.676354	-0.00846456	0.00709279	0.232711	-0.529723	0.0936371	1.538691e-08	0.0159792	0.0136843	0.242926	0.230351	20	cis	No
ENSG00000203721	1	LINC00862	200311672	rs56198864	1	200055302	T	C	0.913399	-0.0223586	0.0132024	0.0903557	-0.416177	0.123545	0.000755434	0.0537238	0.0355063	0.13026	NA	NA	cis	No
ENSG00000143537	1	ADAM15	155023042	rs45444697	1	155034632	C	G	0.792484	-0.0142505	0.00909289	0.117064	-0.477936	0.0733922	7.41176e-11	0.0298168	0.0195685	0.127581	0.304652	9	cis	No
ENSG00000143079	1	CTTNBP2NL	112938803	rs151328843	1	111969386	G	T	0.99148	-0.0400481	0.0413912	0.333268	-1.26606	0.347215	0.000266011	0.0316321	0.0338243	0.349692	NA	NA	cis	No
ENSG00000230615	1	ENSG00000230615	44501798	rs270753	1	45004566	C	T	0.924136	0.00617799	0.0123093	0.615741	-0.689334	0.178526	0.000112807	-0.00896226	0.018007	0.618689	0.249602	3	cis	No
ENSG00000183317	1	EPHA10	38179552	rs112251752	1	38946599	G	A	0.976774	0.0916253	0.0301478	0.00237207	-0.941946	0.247179	0.000138525	-0.0972723	0.0409381	0.0174975	NA	NA	cis	No
ENSG00000234219	1	ENSG00000234219	207935929	rs79110523	1	208473290	G	A	0.96627	0.0135025	0.022033	0.539988	0.693898	0.188881	0.000239041	0.0194589	0.0321913	0.545526	NA	NA	cis	No
ENSG00000074800	1	ENO1	8921061	rs7540307	1	9011537	G	A	0.625467	-0.0162651	0.00722586	0.0243878	0.405728	0.101839	6.77659e-05	-0.0400887	0.0204557	0.0500213	0.198595	5	cis	No
ENSG00000162639	1	HENMT1	109190912	rs2000259	1	108534241	C	A	0.64239	0.000550187	0.00748152	0.941377	-0.339131	0.0979363	0.000534643	-0.00162234	0.0220658	0.94139	0.608153	3	cis	No
ENSG00000249007	1	ENSG00000249007	201980498	rs115922909	1	201776910	G	A	0.982376	-0.0412966	0.0323578	0.201868	-0.951221	0.264829	0.000328361	0.0434143	0.0361007	0.229135	NA	NA	cis	No
ENSG00000169442	1	CD52	26644448	rs2316002	1	26854674	C	T	0.585084	-0.000472916	0.00709942	0.94689	-0.260963	0.0747033	0.000477041	0.0018122	0.0272096	0.946899	NA	NA	cis	No
ENSG00000180875	1	GREM2	240652873	rs629834	1	239914433	G	A	0.968137	0.00700229	0.0232173	0.762958	-1.10367	0.282072	9.12582e-05	-0.00634455	0.0210989	0.763639	NA	NA	cis	No
ENSG00000162747	1	FCGR3B	161592986	rs77515554	1	161231221	C	T	0.973623	-0.0185912	0.0183255	0.310346	1.05971	0.244908	1.511759e-05	-0.0175437	0.0177619	0.323293	NA	NA	cis	No
ENSG00000169224	1	GCSAML	247670360	rs74227709	1	247722588	G	A	0.930089	-0.00281373	0.013943	0.840071	0.592079	0.122084	1.23616e-06	-0.00475229	0.0235696	0.840208	0.345492	4	cis	No
ENSG00000143179	1	UCK2	165796768	rs7547020	1	165847566	T	C	0.76839	0.00954666	0.0123174	0.438307	0.344744	0.0709521	1.180811e-06	0.027692	0.0361808	0.444046	0.522942	7	cis	No
ENSG00000228288	1	PCAT6	202780082	rs10900469	1	203732453	G	A	0.787582	-0.00552888	0.00807898	0.493751	0.297711	0.0830729	0.000338722	-0.0185713	0.0276273	0.501452	NA	NA	cis	No
ENSG00000180667	1	YOD1	207217194	rs142276608	1	207081254	G	A	0.97619	0.01513	0.02617	0.563169	-0.740925	0.241176	0.00212534	-0.0204204	0.0359407	0.56992	NA	NA	cis	No
ENSG00000228502	1	ENSG00000228502	96912486	rs6663900	1	96394106	C	T	0.951071	0.0318686	0.0158288	0.0440807	0.614804	0.168388	0.000261114	0.0518354	0.029401	0.0778927	NA	NA	cis	No
ENSG00000162390	1	ACOT11	55007930	rs1617287	1	55074840	T	A	0.482843	0.0156133	0.00682971	0.022249	-0.360189	0.0693542	2.064121e-07	-0.0433475	0.0207172	0.0364076	0.0960644	12	cis	No
ENSG00000116922	1	C1orf109	38147242	rs776051	1	38171706	T	C	0.544585	0.00433029	0.00673649	0.520347	0.470742	0.0538934	2.443479e-18	0.00919886	0.0143491	0.521472	0.0714301	13	cis	No
ENSG00000187017	1	ESPN	6484848	rs61763332	1	5846327	G	A	0.954248	-0.0278573	0.0194163	0.151362	0.70832	0.209717	0.000731464	-0.0393287	0.0297825	0.186657	NA	NA	cis	No
ENSG00000066294	1	CD84	160510885	rs10908792	1	160564682	G	C	0.403361	0.00371908	0.00976118	0.703198	-0.282034	0.0567204	6.614546e-07	-0.0131866	0.0347114	0.704024	0.581562	17	cis	No
ENSG00000173110	1	HSPA6	161494036	rs1503861	1	160513626	G	A	0.0849673	-0.00149551	0.0106553	0.88838	-0.389171	0.104333	0.000191421	0.00384281	0.0273989	0.888459	0.649302	5	cis	No
ENSG00000121486	1	TRMT1L	185087220	rs10737260	1	185382088	A	G	0.193627	0.0065453	0.00823111	0.426502	0.311804	0.0894613	0.000491495	0.0209917	0.0270767	0.438181	NA	NA	cis	No
ENSG00000135801	1	TAF5L	229728858	rs60530702	1	229065962	A	G	0.789683	-0.00394732	0.00869573	0.649874	-0.320572	0.0870225	0.000229797	0.0123134	0.0273308	0.652328	0.309758	3	cis	No
ENSG00000090432	1	MUL1	20825943	rs12724366	1	20798620	A	G	0.852591	-0.00541484	0.0103028	0.599188	1.02582	0.0785902	6.127096e-39	-0.00527855	0.0100516	0.599483	0.386577	20	cis	No
ENSG00000188257	1	PLA2G2A	20301925	rs4655219	1	20887986	A	G	0.65021	0.015168	0.00673675	0.0243517	-0.353895	0.0738323	1.641168e-06	-0.0428602	0.0210315	0.04156	0.856996	6	cis	No
ENSG00000273175	1	ENSG00000273175	245028040	rs10754480	1	246015204	A	G	0.187675	-0.0222824	0.00792345	0.00492028	-0.453984	0.119175	0.00013931	0.0490819	0.0216938	0.0236675	NA	NA	cis	No
ENSG00000066279	1	ASPM	197053258	rs1342695	1	197767024	G	A	0.945261	-0.0269256	0.0172796	0.119179	0.566831	0.162957	0.000504418	-0.047502	0.0334036	0.155009	0.730869	3	cis	No
ENSG00000171621	1	SPSB1	9352939	rs12074517	1	9493819	C	G	0.921335	0.00252272	0.0104716	0.809625	-0.568656	0.0923013	7.234873e-10	-0.00443628	0.0184287	0.809767	0.340352	5	cis	No
ENSG00000116793	1	PHTF1	114239453	rs4145859	1	114312435	G	C	0.762425	0.00879395	0.00743817	0.237097	-0.433327	0.0730261	2.958867e-09	-0.020294	0.0175027	0.246259	0.823571	14	cis	No
ENSG00000180758	1	GPR157	9160364	rs12750121	1	9147101	C	T	0.854458	-0.00399398	0.00826331	0.628855	0.339655	0.0742164	4.72714e-06	-0.0117589	0.0244638	0.630754	0.591992	7	cis	No
ENSG00000116285	1	ERRFI1	8064464	rs76235370	1	7272971	G	A	0.886555	0.0174229	0.0131073	0.183764	-0.464325	0.131063	0.000395951	-0.0375231	0.0301503	0.213303	NA	NA	cis	No
ENSG00000231181	1	RPL9P11	9636485	rs12028131	1	9076418	C	T	0.957166	0.025871	0.0122309	0.0344116	-0.667995	0.18229	0.000247862	-0.0387293	0.0211413	0.0669618	NA	NA	cis	No
ENSG00000228526	1	MIR34AHG	9242066	rs142441518	1	9038524	G	A	0.981909	0.00834588	0.0194362	0.667633	-1.66658	0.390594	1.983111e-05	-0.00500779	0.0117212	0.669204	NA	NA	cis	No
ENSG00000186715	1	MST1L	17081405	rs7527619	1	17189537	C	T	0.949304	-0.00195576	0.0198466	0.9215	0.936681	0.110702	2.64423e-17	-0.00208797	0.0211897	0.921506	0.633428	17	cis	No
ENSG00000143409	1	MINDY1	150969025	rs6690662	1	150988961	C	T	0.241597	0.00146694	0.0076778	0.848477	-0.35565	0.0637916	2.472665e-08	-0.00412467	0.0216008	0.848564	0.501743	12	cis	No
ENSG00000117394	1	SLC2A1	43391052	rs710221	1	43414200	G	A	0.595938	-8.83844e-05	0.00652263	0.989189	0.279987	0.0561645	6.192243e-07	-0.000315673	0.0232963	0.989189	NA	NA	cis	No
ENSG00000066135	1	KDM4A	44115829	rs10890251	1	43976266	A	C	0.662932	0.00651701	0.00667576	0.328955	0.288042	0.0591818	1.13263e-06	0.0226252	0.0236379	0.338488	0.0910541	19	cis	No
ENSG00000183520	1	UTP11	38474930	rs72663616	1	38478186	G	C	0.98226	0.0763553	0.031523	0.0154264	0.873753	0.187757	3.261207e-06	0.0873877	0.0406722	0.0316671	NA	NA	cis	No
ENSG00000143850	1	PLEKHA6	204187979	rs7547251	1	204308815	T	C	0.735061	-0.00262912	0.0077456	0.734283	0.540333	0.0818554	4.082162e-11	-0.00486574	0.0143538	0.73462	0.0355952	18	cis	No
ENSG00000158615	1	PPP1R15B	204372515	rs1554678	1	204052408	G	A	0.138422	-0.00395092	0.00910386	0.664301	0.453331	0.135742	0.000838843	-0.00871531	0.020251	0.66693	NA	NA	cis	No
ENSG00000186501	1	TMEM222	27648651	rs116224862	1	27602489	G	A	0.987512	0.0803861	0.0355643	0.0238024	1.91871	0.203662	4.465781e-21	0.0418959	0.0190615	0.0279541	0.389853	20	cis	No
ENSG00000175087	1	PDIK1L	26437664	rs4649076	1	25503719	C	T	0.670285	0.00957221	0.0107021	0.371095	0.225072	0.05936	0.000149652	0.0425295	0.0488547	0.38401	NA	NA	cis	No
ENSG00000130772	1	MED18	28655513	rs12121731	1	28553997	G	A	0.742297	-0.000374908	0.00793855	0.962333	0.275541	0.0662471	3.19234e-05	-0.00136063	0.0288126	0.962335	0.696163	6	cis	No
ENSG00000158006	1	PAFAH2	26286258	rs12030759	1	26289422	C	A	0.375117	0.00512201	0.00680577	0.451691	-0.288373	0.0681911	2.348432e-05	-0.0177618	0.0239714	0.45872	0.288708	10	cis	No
ENSG00000225891	1	ENSG00000225891	26789247	rs11802776	1	27104610	G	A	0.788399	0.000521767	0.00855302	0.951356	-0.356543	0.0827655	1.648359e-05	-0.00146341	0.0239912	0.951361	0.988746	6	cis	No
ENSG00000117632	1	STMN1	26210672	rs9438898	1	25523467	C	G	0.671968	-0.000516686	0.00719127	0.942722	-0.338866	0.0930569	0.00027106	0.00152475	0.0212257	0.942733	NA	NA	cis	No
ENSG00000142677	1	IL22RA1	24446261	rs10794665	1	24446128	G	A	0.598856	0.00157785	0.00680351	0.816602	0.378006	0.0939687	5.753954e-05	0.00417414	0.0180283	0.816901	0.33838	5	cis	No
ENSG00000020633	1	RUNX3	25226002	rs486575	1	24690080	A	G	0.515406	-0.00721641	0.00698156	0.301305	0.352852	0.0879307	5.999206e-05	-0.0204517	0.0204319	0.316844	0.379729	3	cis	No
ENSG00000142623	1	PADI1	17531621	rs11203336	1	17556087	G	T	0.744748	0.00757245	0.00923072	0.412015	-0.412222	0.0565239	3.034026e-13	-0.0183698	0.0225338	0.414951	0.902489	4	cis	No
ENSG00000163877	1	SNIP1	38000050	rs61776212	1	38094512	C	G	0.738329	0.00909041	0.00735613	0.216548	0.449682	0.0997244	6.505867e-06	0.0202152	0.0169617	0.233334	0.327157	10	cis	No
ENSG00000163518	1	FCRL4	157543539	rs17454196	1	158026124	C	A	0.776144	0.00058179	0.00828349	0.944007	-0.316383	0.0948628	0.000852492	-0.00183888	0.0261876	0.944019	NA	NA	cis	No
ENSG00000085552	1	IGSF9	159896829	rs1320566	1	159903634	C	T	0.663866	-0.0139962	0.00677336	0.0387944	0.298963	0.0783058	0.000134598	-0.0468158	0.0257617	0.0691765	0.747063	5	cis	No
ENSG00000158710	1	TAGLN2	159887897	rs11265297	1	159890459	T	C	0.576331	-0.0148663	0.00706664	0.035402	0.277469	0.072516	0.000130076	-0.0535782	0.0290638	0.06526	0.884804	7	cis	No
ENSG00000169598	1	DFFB	3773845	rs6670589	1	3793240	T	C	0.838585	-0.0135263	0.00952565	0.155611	-0.640054	0.074014	5.252638e-18	0.0211331	0.0150819	0.161148	0.0201498	20	cis	No
ENSG00000224051	1	CPTP	1260136	rs56378990	1	1163474	A	G	0.929423	0.026745	0.011432	0.0193105	0.726951	0.17271	2.564041e-05	0.0367907	0.0179919	0.0408696	0.758171	9	cis	No
ENSG00000215014	1	ENSG00000215014	1510355	rs35035339	1	1329421	G	A	0.889122	0.00599994	0.0124412	0.629617	0.576334	0.148719	0.000106488	0.0104105	0.0217533	0.632243	0.027851	3	cis	No
ENSG00000228037	1	LOC100996583	2512999	rs6604989	1	2576455	T	C	0.0194911	-0.00705514	0.0300336	0.81428	-0.984733	0.233383	2.449649e-05	0.00716452	0.0305465	0.814562	0.706983	5	cis	No
ENSG00000168264	1	IRF2BP2	234740015	rs115072523	1	235746578	G	A	0.989262	-0.0588194	0.040833	0.149729	1.37231	0.346107	7.340118e-05	-0.0428616	0.0316578	0.175767	NA	NA	cis	No
ENSG00000135821	1	GLUL	182350839	rs77544651	1	181832395	C	T	0.976657	0.0159557	0.0273092	0.559044	-1.13853	0.294092	0.00010824	-0.0140143	0.024258	0.563454	NA	NA	cis	No
ENSG00000120334	1	CENPL	173768688	rs146627001	1	174212225	G	A	0.970355	0.01541	0.0235146	0.512251	0.882836	0.228337	0.000110468	0.0174551	0.0270152	0.5182	0.717024	6	cis	No
ENSG00000233328	1	ENSG00000233328	171639657	rs76987566	1	170669205	C	T	0.984477	-0.0752731	0.0323637	0.0200266	-1.40385	0.434254	0.00122589	0.053619	0.0284	0.0590269	NA	NA	cis	No
ENSG00000272906	1	ENSG00000272906	179850742	rs143975949	1	179398036	G	A	0.982376	-0.0284282	0.030599	0.35286	1.07058	0.273564	9.098483e-05	-0.026554	0.0293761	0.366031	0.964682	7	cis	No
ENSG00000143340	1	FAM163A	179712298	rs80239287	1	178797765	A	C	0.989963	-0.0150379	0.0181078	0.406275	0.947661	0.273336	0.000526263	-0.0158684	0.0196484	0.41931	NA	NA	cis	No
ENSG00000116497	1	S100PBP	33282368	rs59669045	1	33444351	G	A	0.768557	-0.00932224	0.00740882	0.208297	-0.277598	0.0640063	1.444142e-05	0.0335818	0.0277895	0.226881	0.466394	9	cis	No
ENSG00000134684	1	YARS1	33240840	rs6425793	1	32668428	A	G	0.713936	-0.00572213	0.00826994	0.488988	-0.305435	0.0773287	7.820684e-05	0.0187344	0.0274882	0.495529	NA	NA	cis	No
ENSG00000121900	1	TMEM54	33360195	rs150850137	1	33892190	T	A	0.98226	-0.0226144	0.0362928	0.533213	1.02767	0.28521	0.000314324	-0.0220055	0.0358398	0.539218	NA	NA	cis	No
ENSG00000253304	1	TMEM200B	29445940	rs75197335	1	30058478	C	T	0.950864	-0.00920893	0.0172627	0.593717	0.848928	0.223403	0.00014471	-0.0108477	0.0205341	0.597306	NA	NA	cis	No
ENSG00000225518	1	ENSG00000225518	226271340	rs143418113	1	226280258	G	A	0.895075	-0.0167779	0.0124385	0.17738	0.473919	0.122973	0.000116284	-0.0354025	0.0278072	0.202969	0.183725	4	cis	No
ENSG00000181450	1	ZNF678	227751244	rs138325117	1	227696589	C	T	0.981326	0.0379926	0.0244307	0.119918	-0.940896	0.201552	3.037664e-06	-0.0403792	0.0273682	0.140104	0.88769	3	cis	No
ENSG00000007968	1	E2F2	23832922	rs6684096	1	23985309	G	A	0.475373	-0.00674179	0.00642468	0.294013	0.265234	0.0709708	0.00018606	-0.0254183	0.0251594	0.312357	NA	NA	cis	No
ENSG00000198929	1	NOS1AP	162039564	rs164151	1	162338962	C	T	0.149743	-0.00947893	0.00916522	0.301029	-0.390386	0.0756604	2.473254e-07	0.0242809	0.0239443	0.310555	0.794735	3	cis	No
ENSG00000185630	1	PBX1	164524821	rs115972673	1	163825800	G	T	0.94631	0.00149527	0.0190795	0.937534	0.89191	0.222608	6.159028e-05	0.00167648	0.0213958	0.937545	0.838834	5	cis	No
ENSG00000134369	1	NAV1	201592411	rs494629	1	201543223	A	T	0.805789	0.000664091	0.0081503	0.93506	0.345809	0.0675485	3.064815e-07	0.0019204	0.0235718	0.935068	0.639336	6	cis	No
ENSG00000240038	1	AMY2B	104096437	rs34487026	1	104093027	G	A	0.809174	-7.98186e-05	0.00851714	0.992523	0.427895	0.0721641	3.039177e-09	-0.000186538	0.0199048	0.992523	0.617247	8	cis	No
ENSG00000229989	1	ENSG00000229989	198776622	rs4529735	1	197938806	C	T	0.989146	-0.0191817	0.0365336	0.599553	1.31489	0.366806	0.000337466	-0.0145881	0.028081	0.603412	NA	NA	cis	No
ENSG00000224950	1	ENSG00000224950	117035645	rs7554038	1	117041688	G	A	0.797035	-0.00704834	0.00911567	0.439398	0.571968	0.0871948	5.393153e-11	-0.012323	0.0160477	0.442549	0.787203	3	cis	No
ENSG00000271427	1	ENSG00000271427	117907521	rs12135190	1	118009434	C	A	0.868114	0.0135112	0.0107703	0.209664	0.485612	0.0867137	2.141329e-08	0.027823	0.0227285	0.220896	0.233214	5	cis	No
ENSG00000153187	1	HNRNPU	245014468	rs59068356	1	245034355	C	T	0.908263	-0.0200073	0.0155645	0.198636	-0.436495	0.123352	0.000402256	0.0458363	0.0379377	0.226972	NA	NA	cis	No
ENSG00000143702	1	CEP170	243287730	rs4658551	1	243401997	C	A	0.540266	-0.0108288	0.00667802	0.104899	0.38993	0.0841057	3.548918e-06	-0.0277711	0.0181435	0.12586	0.610152	11	cis	No
ENSG00000143669	1	LYST	235824341	rs6673218	1	236041062	C	T	0.242414	0.00154365	0.00793824	0.845817	-0.318067	0.0875575	0.000280509	-0.00485322	0.0249935	0.846035	NA	NA	cis	No
ENSG00000116731	1	PRDM2	14026693	rs2495082	1	14157986	G	A	0.799953	-0.00240631	0.00818588	0.768789	0.413539	0.0929561	8.63692e-06	-0.00581882	0.0198379	0.769278	0.449871	4	cis	No
ENSG00000142634	1	EFHD2	15736391	rs12090769	1	15625820	C	T	0.940359	0.00724879	0.0146046	0.619658	-0.914714	0.195882	3.016033e-06	-0.00792465	0.0160562	0.62162	0.705763	6	cis	No
ENSG00000055070	1	SZRD1	16679070	rs61780990	1	15760015	C	T	0.955065	0.0250254	0.018886	0.185146	0.765271	0.166244	4.158691e-06	0.0327014	0.0256809	0.202886	0.0361931	5	cis	No
ENSG00000196189	1	SEMA4A	156117157	rs7695	1	156147326	T	C	0.602241	0.0185488	0.00734033	0.0115052	0.624887	0.0543872	1.488189e-30	0.0296834	0.0120274	0.0135876	0.00399309	13	cis	No
ENSG00000074964	1	ARHGEF10L	17866330	rs730387	1	17410557	G	A	0.679855	0.00251919	0.0067877	0.710533	0.338457	0.0731736	3.738812e-06	0.00744316	0.0201193	0.711419	0.710822	20	cis	No
ENSG00000273160	1	ENSG00000273160	167426979	rs10918784	1	167832458	T	C	0.442577	0.00214105	0.00697682	0.758934	0.240964	0.0724394	0.00087968	0.00888535	0.0290767	0.759922	NA	NA	cis	No
ENSG00000067704	1	IARS2	220267444	rs114745121	1	220492316	C	T	0.985294	0.00798108	0.0365984	0.827373	-1.22171	0.295888	3.64396e-05	-0.00653271	0.0299985	0.82761	NA	NA	cis	No
ENSG00000135763	1	URB2	229761981	rs997125	1	229758552	G	T	0.557773	0.000331112	0.00651208	0.959448	-0.359726	0.0895501	5.893463e-05	-0.000920456	0.0181043	0.959452	0.191001	5	cis	No
ENSG00000175279	1	CENPS	10490159	rs2847336	1	10495110	C	T	0.927171	-0.000652269	0.0110687	0.953009	0.97747	0.0969743	6.79443e-24	-0.000667303	0.011324	0.953009	0.481967	20	cis	No
ENSG00000116649	1	SRM	11114641	rs145790937	1	11998178	T	G	0.939309	-0.0117373	0.0160967	0.465893	0.657731	0.164872	6.625603e-05	-0.0178451	0.0248785	0.473195	0.0312102	8	cis	No
ENSG00000233061	1	ENSG00000233061	84444801	rs4448535	1	84068566	A	T	0.0414332	-0.035897	0.0185141	0.0525135	0.691549	0.197902	0.000475122	-0.0519081	0.0306169	0.0899985	NA	NA	cis	No
ENSG00000117069	1	ST6GALNAC5	77333126	rs9725074	1	77363004	A	G	0.514911	-0.0146852	0.00681146	0.0310872	0.319615	0.0717662	8.445915e-06	-0.0459465	0.0236773	0.0523153	0.18209	5	cis	No
ENSG00000162627	1	SNX7	99127236	rs12723363	1	99127205	A	G	0.0252101	-0.00154905	0.0159209	0.922491	-0.949449	0.110774	1.025499e-17	0.00163153	0.0167696	0.922496	0.744456	18	cis	No
ENSG00000171163	1	ZNF692	249144205	rs114394742	1	248502721	C	T	0.821074	0.0083101	0.0135585	0.539938	0.318462	0.0888937	0.000340317	0.0260945	0.0431935	0.545758	NA	NA	cis	No
ENSG00000143398	1	PIP5K1A	151170425	rs182830202	1	151171353	C	T	0.969304	-0.0172335	0.0219273	0.431905	0.968524	0.216375	7.60077e-06	-0.0177936	0.0229863	0.438874	0.627238	10	cis	No
ENSG00000116221	1	MRPL37	54649714	rs113452669	1	54672492	C	T	0.982843	-0.0111576	0.0238657	0.640131	-1.16177	0.204437	1.32525e-08	0.00960397	0.0206119	0.641257	NA	NA	cis	No
ENSG00000162385	1	MAGOH	53692564	rs34107528	1	53537396	G	A	0.941643	-0.000768208	0.0169817	0.963918	0.902927	0.234047	0.000114373	-0.000850797	0.0188087	0.963921	0.706603	3	cis	No
ENSG00000188396	1	DYNLT4	45271585	rs34134455	1	45655516	A	G	0.840686	0.0143376	0.00888542	0.106612	-0.325648	0.0980416	0.00089526	-0.0440279	0.0303347	0.146667	NA	NA	cis	No
ENSG00000236806	1	RPL7AP15	146695146	rs75262949	1	146649186	G	A	0.963936	0.00408017	0.0217637	0.851287	0.691594	0.18487	0.000183302	0.00589966	0.0315084	0.851472	0.990089	5	cis	No
ENSG00000219133	1	RPL21P19	204315904	rs10900591	1	203661480	T	G	0.28408	0.00627739	0.00717347	0.381528	0.262509	0.0733794	0.000346999	0.023913	0.0281322	0.395312	NA	NA	cis	No
ENSG00000143842	1	SOX13	204042243	rs80200989	1	204012274	G	A	0.977591	-0.0348886	0.0261481	0.182115	-0.707938	0.20746	0.00064391	0.049282	0.0396586	0.213995	NA	NA	cis	No
ENSG00000188783	1	PRELP	203444956	rs10920636	1	203371989	G	A	0.48296	-0.00694615	0.00700609	0.321469	0.259109	0.0701373	0.000220485	-0.0268078	0.027996	0.338284	NA	NA	cis	No
ENSG00000235449	1	ENSG00000235449	202736357	rs2275896	1	202780663	T	C	0.454132	0.00678474	0.00651811	0.297919	0.237945	0.0579496	4.024567e-05	0.0285139	0.0282599	0.31298	NA	NA	cis	No
ENSG00000175707	1	KDF1	27276053	rs76388446	1	27123140	G	T	0.786765	0.00101233	0.00855074	0.905758	0.308451	0.0651885	2.226741e-06	0.00328198	0.0277302	0.905787	0.970777	6	cis	No
ENSG00000185436	1	IFNLR1	24480647	rs1538633	1	24516690	G	A	0.641573	-0.0213119	0.00691603	0.00205949	0.368093	0.0564101	6.786426e-11	-0.0578981	0.0207785	0.00532903	0.0523168	9	cis	No
ENSG00000229348	1	ENSG00000229348	43919598	rs622762	1	43695653	T	C	0.915383	-0.0158121	0.00999199	0.113541	-0.454223	0.115576	8.491904e-05	0.0348113	0.0237143	0.142119	NA	NA	cis	No
ENSG00000162923	1	WDR26	224572845	rs114645810	1	224052954	G	A	0.957283	-0.00377312	0.0201684	0.851597	0.788305	0.199506	7.773387e-05	-0.00478637	0.0256132	0.851761	NA	NA	cis	No
ENSG00000142694	1	EVA1B	36787632	rs61775902	1	36698861	C	T	0.622432	-0.001086	0.0142544	0.93927	-0.472415	0.069857	1.355351e-11	0.00229883	0.0301754	0.939274	0.57483	17	cis	No
ENSG00000214193	1	SH3D21	36771988	rs12076218	1	36791726	C	A	0.733777	0.00942891	0.00744732	0.205485	0.604918	0.0610633	3.904434e-23	0.0155871	0.0124114	0.209165	0.531818	20	cis	No
ENSG00000229994	1	RPL5P4	35816323	rs7514660	1	35629448	T	C	0.0790149	-0.00631651	0.00937617	0.500517	0.314463	0.0873431	0.000317829	-0.0200867	0.0303339	0.507853	0.897942	3	cis	No
ENSG00000160688	1	FLAD1	154955814	rs1506983	1	154737423	G	C	0.328898	0.00782597	0.00698053	0.26224	0.317493	0.077915	4.604124e-05	0.0246493	0.0228034	0.27972	NA	NA	cis	No
ENSG00000163354	1	DCST2	154990996	rs10796937	1	155017385	T	A	0.387138	0.000963855	0.00755356	0.898463	0.373143	0.0990496	0.000165067	0.00258307	0.0202547	0.898521	0.599775	3	cis	No
ENSG00000213088	1	ACKR1	159173097	rs151313645	1	159655933	C	A	0.977241	0.0168014	0.0271221	0.535605	-0.881197	0.256588	0.000594117	-0.0190666	0.0312754	0.542104	NA	NA	cis	No
ENSG00000162755	1	KLHDC9	161068151	rs16831677	1	160209273	C	T	0.966036	-0.0033565	0.0233254	0.885581	0.795578	0.208858	0.000139427	-0.00421895	0.0293397	0.885661	NA	NA	cis	No
ENSG00000242485	1	MRPL20	1337288	rs2275915	1	1342612	G	C	0.818861	-0.0108613	0.0097973	0.267601	0.818369	0.0808376	4.34047e-24	-0.0132719	0.0120433	0.270456	0.00356369	20	cis	No
ENSG00000169972	1	PUSL1	1243947	rs2275915	1	1342612	G	C	0.818861	-0.0108613	0.0097973	0.267601	-0.396018	0.0891063	8.816588e-06	0.0274263	0.0254976	0.282087	0.00738043	4	cis	No
ENSG00000137942	1	FNBP1L	93913688	rs150429317	1	93866110	G	C	0.960668	0.0231157	0.0186674	0.215607	0.925171	0.233635	7.498197e-05	0.0249853	0.0211408	0.237263	0.402652	5	cis	No
ENSG00000116991	1	SIPA1L2	232533711	rs6424239	1	232758337	G	A	0.51669	0.0227508	0.00662928	0.00059944	-0.387721	0.0902971	1.756101e-05	-0.0586783	0.0218882	0.00734436	NA	NA	cis	No
ENSG00000225982	1	ENSG00000225982	182055686	rs76621689	1	182430798	A	G	0.973156	0.00761622	0.0211972	0.719369	-0.817218	0.229514	0.000369951	-0.00931969	0.02607	0.720727	NA	NA	cis	No
ENSG00000135842	1	NIBAN1	184759858	rs333714	1	185563814	T	C	0.954715	-0.0125193	0.0185353	0.499403	-0.623563	0.16139	0.000111679	0.020077	0.0301756	0.505833	NA	NA	cis	No
ENSG00000175130	1	MARCKSL1	32799433	rs72660871	1	31934701	A	G	0.960551	0.0230331	0.0214337	0.282546	0.776444	0.204006	0.000141241	0.0296649	0.0286842	0.301048	NA	NA	cis	No
ENSG00000184007	1	PTP4A2	32372022	rs645654	1	32371747	T	C	0.859127	0.00729636	0.0083896	0.38447	0.482151	0.0715005	1.548058e-11	0.0151329	0.0175445	0.388387	0.965376	20	cis	No
ENSG00000225828	1	FAM229A	32826871	rs2273376	1	32832292	A	G	0.970588	0.0101601	0.0202897	0.616546	1.0297	0.167264	7.454761e-10	0.00986705	0.0197696	0.617707	0.361879	5	cis	No
ENSG00000116514	1	RNF19B	33402046	rs61799673	1	34036264	T	C	0.923669	0.029393	0.0150387	0.0506433	0.593207	0.142073	2.97518e-05	0.0495493	0.0279916	0.0767018	NA	NA	cis	No
ENSG00000226944	1	RNF207-AS1	6264900	rs114174266	1	6266086	A	G	0.965103	0.0255309	0.0213658	0.232109	-1.02343	0.155744	4.990122e-11	-0.0249464	0.021219	0.23973	0.0304103	6	cis	No
ENSG00000242861	1	ENSG00000242861	226028584	rs12075664	1	226042770	T	C	0.961485	-0.0142496	0.0130457	0.274706	0.649614	0.160288	5.06089e-05	-0.0219355	0.0207988	0.291585	0.201666	7	cis	No
ENSG00000173372	1	C1QA	22962999	rs16825800	1	22003666	C	G	0.939659	0.0011898	0.0143637	0.933983	0.783301	0.195137	5.967029e-05	0.00151896	0.0183413	0.933998	NA	NA	cis	No
ENSG00000057757	1	PITHD1	24104895	rs61778163	1	24202985	G	A	0.70775	0.00385591	0.00733414	0.599063	0.282083	0.0807296	0.00047554	0.0136694	0.0262926	0.603136	NA	NA	cis	No
ENSG00000162545	1	CAMK2N1	20808884	rs144825843	1	20012980	G	A	0.989146	-0.00697392	0.034519	0.839892	1.27904	0.340071	0.000169169	-0.00545246	0.0270271	0.84012	NA	NA	cis	No
ENSG00000198821	1	CD247	167399877	rs139281402	1	168001799	T	C	0.980976	0.0341264	0.0320361	0.286764	-0.949662	0.274786	0.000548234	-0.0359353	0.0353003	0.308684	NA	NA	cis	No
ENSG00000007908	1	SELE	169691781	rs77977611	1	169081792	T	G	0.961601	-0.0472301	0.0186454	0.0113069	0.776735	0.192354	5.38982e-05	-0.0608059	0.028337	0.0318876	0.163597	8	cis	No
ENSG00000116852	1	KIF21B	200938520	rs139440938	1	201002389	T	C	0.981113	0.0379001	0.0325181	0.243813	1.07041	0.220196	1.166899e-06	0.0354071	0.0312401	0.257052	NA	NA	cis	No
ENSG00000077152	1	UBE2T	202300785	rs112577603	1	202777105	C	G	0.921335	0.0127754	0.0129772	0.324895	-0.521628	0.141337	0.000223656	-0.0244914	0.0257481	0.341507	NA	NA	cis	No
ENSG00000232626	1	LOC100420423	202407524	rs11577596	1	203352244	A	G	0.764472	0.00293992	0.00749797	0.694988	0.278191	0.081793	0.000671006	0.010568	0.0271311	0.696895	NA	NA	cis	No
ENSG00000159388	1	BTG2	203274619	rs78966821	1	202736269	C	T	0.989029	-0.0151931	0.0348431	0.662806	-1.08383	0.326409	0.000898667	0.014018	0.0324241	0.665501	NA	NA	cis	No
ENSG00000117009	1	KMO	241695434	rs75044578	1	242710836	G	A	0.987395	0.00589873	0.0291979	0.839897	0.83036	0.235022	0.000410689	0.00710382	0.0352204	0.840154	NA	NA	cis	No
ENSG00000152904	1	GGPS1	235490665	rs36101773	1	235178179	C	A	0.809874	-0.0097225	0.0120356	0.4192	-0.317287	0.0920716	0.000568761	0.0306426	0.0389611	0.431579	NA	NA	cis	No
ENSG00000272510	1	ENSG00000272510	15892106	rs146777164	1	16038384	C	T	0.981092	-0.00719888	0.0293924	0.806516	-0.771688	0.192674	6.19807e-05	0.00932874	0.0381596	0.80687	NA	NA	cis	No
ENSG00000048707	1	VPS13D	12290124	rs4846100	1	12277664	C	G	0.587768	-0.003887	0.00780427	0.618441	-0.371142	0.0967143	0.000124288	0.0104731	0.0212041	0.621364	0.683918	3	cis	No
ENSG00000116455	1	WDR77	111982512	rs17720608	1	112126300	C	G	0.980626	-0.019516	0.0307967	0.526276	-1.39679	0.365369	0.000131862	0.013972	0.0223491	0.531857	NA	NA	cis	No
ENSG00000261654	1	ENSG00000261654	111478991	rs2786975	1	112101371	G	A	0.488212	-0.00875264	0.00648581	0.177175	-0.373243	0.0960624	0.000102152	0.0234502	0.0183952	0.202379	0.691921	4	cis	No
ENSG00000143106	1	PSMA5	109941653	rs12030	1	109472813	T	C	0.758637	0.00617054	0.0074276	0.40611	0.307133	0.0871551	0.000425111	0.0200908	0.0248466	0.418749	NA	NA	cis	No
ENSG00000081019	1	RSBN1	114304454	rs77333360	1	114050119	C	T	0.989066	0.0544685	0.0337502	0.106555	-1.15676	0.345206	0.000805405	-0.0470871	0.032384	0.14594	NA	NA	cis	No
ENSG00000117691	1	NENF	212606229	rs7542213	1	212626751	G	A	0.984944	-0.0220707	0.0166885	0.185999	1.1619	0.305336	0.000141626	-0.0189954	0.0152058	0.211586	0.23059	4	cis	No
ENSG00000182795	1	C1orf116	207191866	rs61823005	1	207888169	G	A	0.971055	0.0264061	0.0218256	0.226329	-0.656776	0.201964	0.00114619	-0.0402056	0.0354568	0.256823	NA	NA	cis	No
ENSG00000123838	1	C4BPA	207277607	rs9943268	1	207292105	T	G	0.336368	-0.0047123	0.00683156	0.49033	-0.360873	0.0568617	2.202636e-10	0.0130581	0.0190421	0.492874	0.46001	5	cis	No
ENSG00000204859	1	ZBTB48	6640061	rs12566355	1	6093735	T	C	0.39986	0.00420306	0.0066875	0.529679	0.372298	0.0942592	7.824078e-05	0.0112895	0.0181888	0.534806	NA	NA	cis	No
ENSG00000049246	1	PER3	7844380	rs12128526	1	7723957	G	A	0.539916	0.00421748	0.00653323	0.518575	0.263684	0.0744312	0.00039612	0.0159944	0.0251847	0.525373	0.852648	3	cis	No
ENSG00000241563	1	CORT	10509776	rs12047856	1	10645734	C	T	0.939659	0.00727724	0.0110138	0.508778	-0.664209	0.162834	4.521939e-05	-0.0109563	0.016798	0.514248	0.345013	6	cis	No
ENSG00000116661	1	FBXO2	11708424	rs909934	1	11713563	G	A	0.202965	0.000598972	0.00834634	0.942789	-0.568935	0.0687459	1.27482e-16	-0.0010528	0.0146707	0.942791	0.292046	6	cis	No
ENSG00000175262	1	C1orf127	11006528	rs2379140	1	11466172	A	G	0.582983	-0.00500833	0.00648375	0.439851	0.278026	0.0740001	0.000171891	-0.0180139	0.0238084	0.449279	NA	NA	cis	No
ENSG00000162496	1	DHRS3	12627939	rs3010934	1	12685681	C	T	0.364729	-0.0222438	0.00714947	0.001863	0.28517	0.0571561	6.059381e-07	-0.0780019	0.029546	0.00829021	0.271671	11	cis	No
ENSG00000067334	1	DNTTIP2	94333373	rs75383596	1	94286574	C	T	0.966203	0.00588467	0.0227457	0.795854	0.866763	0.234661	0.000221036	0.00678925	0.0263064	0.796342	NA	NA	cis	No
ENSG00000117525	1	F3	94994781	rs4147872	1	94461538	G	A	0.929038	-0.010878	0.0117318	0.353812	0.596057	0.163735	0.000272239	-0.0182499	0.0203108	0.3689	NA	NA	cis	No
ENSG00000159409	1	CELF3	151674880	rs11801493	1	152507671	C	T	0.977007	-0.0525633	0.0274914	0.0558774	0.836682	0.241648	0.000535384	-0.0628235	0.0375346	0.0941801	NA	NA	cis	No
ENSG00000163159	1	VPS72	151142463	rs4926392	1	150196856	G	A	0.981092	0.0194537	0.0254101	0.443919	-0.899392	0.24103	0.000190381	-0.0216298	0.0288411	0.453275	NA	NA	cis	No
ENSG00000143393	1	PI4KB	151264273	rs10888439	1	151812032	C	T	0.702614	-0.014822	0.00696733	0.0333909	0.364768	0.110658	0.000979494	-0.040634	0.0227331	0.0738658	NA	NA	cis	No
ENSG00000163221	1	S100A12	153346184	rs3014812	1	153388881	A	C	0.881653	0.00543444	0.0104347	0.602501	0.372914	0.0843384	9.795373e-06	0.0145729	0.028175	0.604996	NA	NA	cis	No
ENSG00000157077	1	ZFYVE9	52608046	rs17785388	1	53709447	T	A	0.98366	-0.0290236	0.0311459	0.351409	-0.909418	0.309369	0.00328649	0.0319145	0.0359278	0.374382	NA	NA	cis	No
ENSG00000201457	1	SNORA55	40033046	rs209914	1	40775229	G	T	0.360528	0.00633116	0.00801425	0.429535	0.337362	0.0991991	0.000671753	0.0187667	0.0243881	0.441597	NA	NA	cis	No
ENSG00000214114	1	MYCBP	39328636	rs72670903	1	39072313	C	G	0.885504	-0.012244	0.0119025	0.303628	-0.410369	0.109889	0.000188154	0.0298366	0.0300847	0.321318	NA	NA	cis	No
ENSG00000117010	1	ZNF684	40997233	rs138226211	1	41270716	C	T	0.983077	0.0143297	0.0297822	0.630412	1.03838	0.312353	0.000886166	0.0138001	0.0289803	0.63394	NA	NA	cis	No
ENSG00000117411	1	B4GALT2	44444615	rs12144781	1	44322200	G	C	0.929388	0.00454799	0.0151607	0.764188	0.663437	0.163851	5.143177e-05	0.00685519	0.0229144	0.764814	0.234832	3	cis	No
ENSG00000132773	1	TOE1	45805342	rs112364646	1	46591561	T	C	0.960901	-0.0288493	0.0186152	0.121197	-0.662082	0.173577	0.00013655	0.0435736	0.0303483	0.151063	0.0819374	4	cis	No
ENSG00000132128	1	LRRC41	46726868	rs34426720	1	45986651	C	G	0.979809	0.00409802	0.027525	0.881645	-1.10249	0.230953	1.809192e-06	-0.00371706	0.0249784	0.881703	0.0976928	4	cis	No
ENSG00000186564	1	FOXD2	47901689	rs78041605	1	47800097	C	T	0.954599	-0.0281795	0.0185218	0.128152	-0.696943	0.19785	0.00042736	0.040433	0.0289486	0.162499	NA	NA	cis	No
ENSG00000163909	1	HEYL	40089825	rs74383580	1	39273396	T	C	0.991013	-0.0564446	0.0372334	0.129528	1.20064	0.296123	5.023615e-05	-0.0470121	0.0331081	0.15562	NA	NA	cis	No
ENSG00000237424	1	FOXD2-AS1	47897805	rs78041605	1	47800097	C	T	0.954599	-0.0281795	0.0185218	0.128152	-0.710309	0.19772	0.000327516	0.0396722	0.0283177	0.161223	NA	NA	cis	No
ENSG00000122188	1	LAX1	203734304	rs115453905	1	203296040	G	A	0.981443	0.0130899	0.0301018	0.663669	1.26607	0.347214	0.00026597	0.010339	0.0239443	0.665891	NA	NA	cis	No
ENSG00000196550	1	FAM72A	206136916	rs7541836	1	205461479	A	G	0.701097	-0.00195176	0.00759401	0.797169	-0.378185	0.105096	0.000320103	0.00516086	0.0201313	0.797673	NA	NA	cis	No
ENSG00000107404	1	DVL1	1270656	rs28680595	1	1909553	T	A	0.657563	0.00463909	0.00765692	0.544602	-0.373305	0.0960513	0.000101693	-0.0124271	0.0207589	0.549414	NA	NA	cis	No
ENSG00000184163	1	C1QTNF12	1177826	rs2298215	1	1019175	C	G	0.271125	-0.0022704	0.00844611	0.788076	0.288862	0.0781423	0.000218492	-0.00785981	0.0293165	0.788621	0.649371	3	cis	No
ENSG00000238084	1	ENSG00000238084	25725203	rs55794721	1	25561667	G	A	0.603408	-0.00773453	0.00831191	0.352094	0.344661	0.0926166	0.000198143	-0.022441	0.0248587	0.366663	0.081384	4	cis	No
ENSG00000162571	1	TTLL10	1109264	rs7538773	1	1094979	G	A	0.370215	0.0147986	0.00789355	0.0608246	0.456804	0.0553903	1.624241e-16	0.032396	0.0177208	0.0675302	0.957495	19	cis	No
ENSG00000176022	1	B3GALT6	1167629	rs7536568	1	1171683	A	G	0.885621	0.0263387	0.0100342	0.00866732	-0.692713	0.0812428	1.508997e-17	-0.0380225	0.0151562	0.0121175	0.203122	20	cis	No
ENSG00000131591	1	C1orf159	1017198	rs4074137	1	1026707	C	A	0.40021	0.0164656	0.00809552	0.04196	0.582345	0.0544748	1.131677e-26	0.0282746	0.014151	0.0457088	0.262677	20	cis	No
ENSG00000188157	1	AGRN	955503	rs3128125	1	961464	G	T	0.668884	-0.0116858	0.00782624	0.135395	-0.408535	0.0600043	9.867196e-12	0.0286042	0.0196121	0.144705	0.649078	20	cis	No
ENSG00000237330	1	RNF223	1006346	rs2298215	1	1019175	C	G	0.271125	-0.0022704	0.00844611	0.788076	0.356562	0.0607912	4.481685e-09	-0.00636748	0.0237125	0.788293	0.30018	14	cis	No
ENSG00000223823	1	LINC01342	1072397	rs10907182	1	1066403	T	C	0.396359	0.0133021	0.00698692	0.0569282	-0.461871	0.0544829	2.303681e-17	-0.0288005	0.0155042	0.0632275	0.861545	20	cis	No
ENSG00000188290	1	HES4	934342	rs3128115	1	935833	C	G	0.210736	0.0276225	0.00945369	0.00347931	-0.59875	0.116912	3.033521e-07	-0.0461336	0.018178	0.0111526	0.756591	7	cis	No
ENSG00000223804	1	ENSG00000223804	143647638	rs2994810	1	120352453	A	T	0.204715	0.00978652	0.00764619	0.200573	0.3563	0.0907751	8.66991e-05	0.0274671	0.0225721	0.223658	0.908792	3	cis	No
ENSG00000185090	1	MANEAL	38259474	rs664939	1	38254611	T	C	0.78233	-0.0203889	0.00909121	0.0249159	0.448969	0.11583	0.000106137	-0.0454127	0.0233942	0.0522351	NA	NA	cis	No
ENSG00000092853	1	CLSPN	36185819	rs28494673	1	35187964	G	A	0.761555	0.00345006	0.00795771	0.664616	0.367592	0.0992017	0.000210974	0.00938557	0.0217959	0.666751	NA	NA	cis	No
ENSG00000143321	1	HDGF	156711899	rs78579033	1	155886302	T	C	0.922502	-0.0150303	0.0137712	0.275084	-0.509282	0.150305	0.000703231	0.0295127	0.0284086	0.298868	0.299789	4	cis	No
ENSG00000160741	1	CRTC2	153920145	rs76714553	1	154789982	T	A	0.946662	0.0138968	0.0137643	0.312674	-0.589037	0.156525	0.000167745	-0.0235924	0.0241938	0.32949	NA	NA	cis	No
ENSG00000163564	1	PYHIN1	158900586	rs75014832	1	159133082	G	A	0.984594	0.0524795	0.037155	0.157819	-1.02659	0.329377	0.00182848	-0.0511202	0.0397357	0.198266	NA	NA	cis	No
ENSG00000162738	1	VANGL2	160370376	rs74123196	1	160378283	T	A	0.937325	0.0172715	0.0158572	0.276071	1.23848	0.0938709	9.572545e-40	0.0139457	0.0128473	0.277702	0.238424	11	cis	No
ENSG00000181036	1	FCRL6	159770301	rs2501342	1	159797664	A	G	0.22444	0.0079642	0.0100081	0.426163	-0.58017	0.104545	2.864956e-08	-0.0137274	0.0174267	0.430862	0.550907	5	cis	No
ENSG00000157911	1	PEX10	2336236	rs2643904	1	2236697	A	G	0.135621	0.0167406	0.0095394	0.0792785	-0.456036	0.109446	3.089561e-05	-0.0367089	0.0226976	0.105813	0.160447	4	cis	No
ENSG00000197921	1	HES5	2460184	rs2483286	1	3259369	A	G	0.707983	-0.010876	0.00751456	0.147808	0.217588	0.0714211	0.00231482	-0.0499844	0.0382348	0.191111	NA	NA	cis	No
ENSG00000188739	1	RBM34	235294498	rs291352	1	235721828	G	A	0.483427	0.00568155	0.00677031	0.401365	0.240612	0.0602318	6.475748e-05	0.0236129	0.028752	0.411498	0.76277	7	cis	No
ENSG00000273004	1	ENSG00000273004	185286911	rs857587	1	186261061	A	G	0.818861	0.00154996	0.0080398	0.847127	0.415609	0.121873	0.00064923	0.00372937	0.0193755	0.847367	NA	NA	cis	No
ENSG00000182866	1	LCK	32716840	rs112700864	1	33256025	G	T	0.874183	-0.0109386	0.0108018	0.311221	-0.357528	0.102655	0.000496176	0.0305951	0.0314637	0.330854	NA	NA	cis	No
ENSG00000220785	1	ENSG00000220785	32697259	rs61040603	1	32709117	G	A	0.961018	0.000612017	0.0124704	0.960857	1.12608	0.137809	3.050603e-16	0.000543493	0.0110744	0.960858	0.903566	20	cis	No
ENSG00000229388	1	LINC01715	28969740	rs9426297	1	28983021	T	C	0.718371	-0.0045189	0.00780014	0.562363	-0.257914	0.0775728	0.000884821	0.017521	0.0306989	0.568179	0.408803	3	cis	No
ENSG00000162526	1	TSSK3	32817122	rs2273376	1	32832292	A	G	0.970588	0.0101601	0.0202897	0.616546	1.2351	0.163411	4.08532e-14	0.00822614	0.0164636	0.617317	0.422097	18	cis	No
ENSG00000160055	1	TMEM234	32680073	rs79185852	1	32466048	T	C	0.968137	-0.0454192	0.0260494	0.0812319	-1.05715	0.297617	0.000382241	0.0429638	0.0274497	0.11754	NA	NA	cis	No
ENSG00000160058	1	BSDC1	32830704	rs2273376	1	32832292	A	G	0.970588	0.0101601	0.0202897	0.616546	0.639723	0.172515	0.000208717	0.015882	0.0320043	0.61972	NA	NA	cis	No
ENSG00000134644	1	PUM1	31404353	rs138103183	1	30887822	T	G	0.983427	0.0228531	0.0364092	0.530217	-0.915343	0.275105	0.00087706	-0.0249667	0.0404781	0.53737	NA	NA	cis	No
ENSG00000203684	1	IBA57-DT	228351787	rs3121309	1	228223036	A	G	0.204715	-0.00121025	0.00764123	0.874154	-0.325483	0.086298	0.000162194	0.00371832	0.0234973	0.874264	NA	NA	cis	No
ENSG00000178828	1	RNF186	20140523	rs111289603	1	19195492	A	G	0.967787	0.0152137	0.0227295	0.503279	-1.0473	0.25319	3.52773e-05	-0.0145266	0.0219853	0.508777	NA	NA	cis	No
ENSG00000088280	1	ASAP3	23755056	rs2742963	1	23822178	G	T	0.830415	-0.0129371	0.0084663	0.126494	-0.347969	0.0863691	5.604833e-05	0.0371789	0.0260219	0.153075	0.544588	6	cis	No
ENSG00000198574	1	SH2D1B	162365056	rs11806836	1	162350451	C	G	0.769024	0.00404612	0.00800258	0.613136	0.313104	0.0685442	4.926095e-06	0.0129226	0.0257149	0.615293	0.613249	8	cis	No
ENSG00000152332	1	UHMK1	162467041	rs34954699	1	163450290	A	G	0.517624	0.000613536	0.00653576	0.925209	0.290788	0.0713601	4.602628e-05	0.00210991	0.022482	0.925229	0.321075	8	cis	No
ENSG00000170075	1	GPR37L1	202091986	rs11554728	1	202100103	C	T	0.916783	0.00547159	0.0133359	0.681592	0.586964	0.126748	3.63974e-06	0.00932185	0.0228091	0.682768	0.157406	11	cis	No
ENSG00000213047	1	DENND1B	197473878	rs73067273	1	197957213	G	A	0.966036	0.00797781	0.0160744	0.61968	0.802667	0.249498	0.00129478	0.00993913	0.0202631	0.623778	NA	NA	cis	No
ENSG00000162664	1	ZNF326	90460671	rs114445562	1	89556383	G	A	0.973389	0.0286108	0.0245704	0.244246	-1.13213	0.281537	5.789067e-05	-0.0252717	0.0225944	0.263357	NA	NA	cis	No
ENSG00000116824	1	CD2	117297007	rs78079768	1	116389032	G	A	0.981209	-0.0346958	0.0328666	0.291125	-1.07105	0.284773	0.000169188	0.0323942	0.0318722	0.309449	NA	NA	cis	No
ENSG00000134250	1	NOTCH2	120454176	rs12737726	1	119795859	G	C	0.880719	0.009448	0.0115698	0.414151	-0.467617	0.122311	0.000131742	-0.0202046	0.0253001	0.424525	NA	NA	cis	No
ENSG00000224621	1	ENSG00000224621	16485761	rs77886494	1	15527477	G	A	0.953315	-0.011421	0.0111434	0.305405	-0.680083	0.162654	2.900372e-05	0.0167935	0.0168704	0.319522	NA	NA	cis	No
ENSG00000224321	1	ENSG00000224321	16119291	rs148615101	1	15516516	T	C	0.959967	-0.0449668	0.0209119	0.031532	-0.721523	0.186468	0.000109098	0.0623221	0.0331576	0.0601668	NA	NA	cis	No
ENSG00000171960	1	PPIH	43124096	rs78952666	1	43115821	G	A	0.964169	0.0264079	0.0198551	0.183509	0.558347	0.129121	1.53076e-05	0.0472966	0.0372046	0.203637	NA	NA	cis	No
ENSG00000160087	1	UBE2J2	1189289	rs4018608	1	1203938	T	C	0.970588	-0.0280121	0.0113967	0.0139749	0.53432	0.125933	2.206702e-05	-0.0524257	0.0246499	0.0334355	0.589895	7	cis	No
ENSG00000186827	1	TNFRSF4	1146706	rs2503711	1	2127434	C	A	0.622199	-0.00202232	0.00686615	0.768349	0.245105	0.0730985	0.000799178	-0.00825083	0.028121	0.769213	0.856656	3	cis	No
ENSG00000234917	1	ENSG00000234917	43144406	rs113783409	1	43405445	C	A	0.972456	-0.0226426	0.0250372	0.365805	0.74737	0.203913	0.000247205	-0.0302964	0.0345052	0.37993	0.623453	4	cis	No
ENSG00000241860	1	ENSG00000241860	141474	rs3115853	1	757640	G	A	0.128735	-0.0218252	0.0129543	0.0920295	0.272174	0.0784422	0.000520963	-0.0801884	0.0529099	0.129629	NA	NA	cis	No
ENSG00000134245	1	WNT2B	113009163	rs2813865	1	112437956	A	G	0.242647	-0.00979821	0.00874935	0.262765	0.318302	0.0887487	0.000335079	-0.0307827	0.0287964	0.285079	0.932811	4	cis	No
ENSG00000175984	1	DENND2C	115125469	rs149279976	1	115101412	C	A	0.956466	0.00762157	0.0192162	0.691646	0.843798	0.159209	1.15837e-07	0.00903246	0.0228371	0.692462	0.818721	10	cis	No
ENSG00000235527	1	HIPK1-AS1	114466622	rs11102712	1	114537037	C	T	0.892157	0.019133	0.00889143	0.0314093	0.394191	0.110551	0.000362906	0.0485374	0.0263453	0.0654235	0.049868	4	cis	No
ENSG00000116748	1	AMPD1	115215719	rs6669771	1	114619822	C	A	0.960551	-0.0355164	0.020396	0.0816231	0.863337	0.226362	0.000136751	-0.0411385	0.0259705	0.113183	NA	NA	cis	No
ENSG00000143630	1	HCN3	155247374	rs150550224	1	154335324	C	T	0.982026	-0.0596849	0.0290938	0.0402214	1.07257	0.237931	6.547362e-06	-0.0556466	0.0298021	0.0618727	NA	NA	cis	No
ENSG00000076356	1	PLXNA2	208195587	rs696958	1	208634002	G	A	0.654295	-0.00629925	0.00832391	0.44919	0.280925	0.0748048	0.000173035	-0.0224232	0.030226	0.458176	NA	NA	cis	No
ENSG00000227591	1	HSD11B1-AS1	209834709	rs1933572	1	209062504	G	A	0.701214	-0.00599535	0.00797346	0.452103	0.320846	0.102449	0.00173753	-0.0186861	0.0255576	0.464696	NA	NA	cis	No
ENSG00000171608	1	PIK3CD	9711790	rs9430648	1	9749935	T	G	0.514911	0.0120879	0.0100305	0.228162	0.328238	0.0685729	1.695438e-06	0.0368266	0.0315122	0.242546	0.702353	5	cis	No
ENSG00000171819	1	ANGPTL7	11249398	rs116232720	1	10654837	G	A	0.912232	-0.00168268	0.0141524	0.905357	-0.503838	0.143304	0.000438313	0.00333972	0.0281052	0.905411	0.916125	3	cis	No
ENSG00000132879	1	FBXO44	11714432	rs909934	1	11713563	G	A	0.202965	0.000598972	0.00834634	0.942789	-0.919506	0.0614633	1.335468e-50	-0.000651406	0.00907709	0.94279	0.440409	12	cis	No
ENSG00000180488	1	MIGA1	78245309	rs199687	1	77482187	A	G	0.837302	-0.00242444	0.00923296	0.792871	-0.320826	0.0863518	0.000202932	0.00755687	0.0288505	0.793374	NA	NA	cis	No
ENSG00000143294	1	PRCC	156720402	rs1332714	1	157489516	T	G	0.703198	0.0144019	0.00803409	0.073036	-0.281647	0.0795489	0.000399292	-0.0511346	0.0319732	0.109755	NA	NA	cis	No
ENSG00000122218	1	COPA	160259063	rs145051053	1	160173232	C	T	0.909781	0.0172461	0.0112236	0.124392	0.426782	0.122719	0.000505722	0.0404096	0.0287508	0.159869	NA	NA	cis	No
ENSG00000177954	1	RPS27	153963235	rs114853077	1	154852735	C	T	0.975023	-0.0241784	0.0266041	0.363445	-1.12378	0.296947	0.000154051	0.0215152	0.0243468	0.376859	NA	NA	cis	No
ENSG00000213561	1	ENSG00000213561	78509067	rs74846481	1	78519504	T	C	0.978291	0.0198303	0.0247827	0.423613	1.23277	0.271687	5.693557e-06	0.016086	0.0204135	0.430692	0.259302	7	cis	No
ENSG00000240731	1	ENSG00000240731	1252961	rs4970446	1	1340696	T	C	0.93289	0.0342462	0.0117335	0.00351521	0.510178	0.119063	1.827759e-05	0.067126	0.0278272	0.0158548	0.384181	6	cis	No
ENSG00000186891	1	TNFRSF18	1138888	rs75972122	1	1151973	G	C	0.850724	0.0293792	0.00902225	0.00112873	-0.356233	0.076014	2.780309e-06	-0.0824719	0.0308406	0.00749219	0.0263097	15	cis	No
ENSG00000228794	1	LINC01128	762988	rs6662635	1	1220425	A	G	0.984244	0.0257045	0.0307044	0.402503	-1.17603	0.324891	0.000294869	-0.021857	0.0267977	0.414711	0.443263	3	cis	No
ENSG00000084652	1	TXLNA	32645287	rs139565416	1	33510234	A	G	0.994036	-0.0252073	0.0203502	0.215465	-1.34286	0.346422	0.000106027	0.0187714	0.0159093	0.23804	NA	NA	cis	No
ENSG00000178821	1	TMEM52	1849029	rs6679999	1	1521280	C	T	0.0407555	0.00840238	0.0234101	0.719654	-0.543687	0.13426	5.132347e-05	-0.0154544	0.0432268	0.720703	0.981104	3	cis	No
ENSG00000228594	1	FNDC10	1533392	rs28401288	1	1574709	G	T	0.709384	0.00243316	0.00969979	0.801933	0.37151	0.0738042	4.810399e-07	0.00654938	0.0261415	0.802173	0.885672	10	cis	No
ENSG00000028137	1	TNFRSF1B	12227060	rs641941	1	12206652	A	G	0.52591	-0.00718851	0.00669715	0.283105	-0.255295	0.057129	7.868e-06	0.0281577	0.0269791	0.296632	0.0092866	9	cis	No
ENSG00000197956	1	S100A6	153507075	rs1329106	1	153168627	C	G	0.399977	0.00427265	0.00702457	0.543026	0.260645	0.0745108	0.000468618	0.0163926	0.0273551	0.549005	NA	NA	cis	No
ENSG00000164011	1	ZNF691	43312280	rs1861	1	43690439	C	A	0.973389	-0.0409353	0.0250708	0.102514	0.844268	0.248889	0.000693476	-0.0484861	0.0329563	0.141231	NA	NA	cis	No
ENSG00000162775	1	RBM15	110881128	rs17026342	1	111244241	G	T	0.947479	-0.00673525	0.0133405	0.613649	-0.896224	0.255925	0.000461946	0.00751514	0.0150391	0.617282	NA	NA	cis	No
ENSG00000137992	1	DBT	100652475	rs72719958	1	101667686	G	C	0.96627	0.00228665	0.0231334	0.92126	-1.33362	0.321996	3.446905e-05	-0.00171462	0.0173513	0.921283	NA	NA	cis	No
ENSG00000268903	1	ENSG00000268903	135141	rs28542142	1	908170	C	G	0.98261	0.00249657	0.0246654	0.919378	-0.346439	0.109931	0.00162481	-0.00720638	0.0712337	0.919419	NA	NA	cis	No
ENSG00000163463	1	KRTCAP2	155141884	rs80240240	1	154751404	C	T	0.899276	-0.00131979	0.00917232	0.885588	-0.508698	0.137099	0.000206906	0.00259445	0.0180445	0.885674	NA	NA	cis	No
ENSG00000271380	1	LOC101928120	154934301	rs369038429	1	154950727	A	T	0.977824	0.0185369	0.029719	0.5328	-1.10701	0.328662	0.000756529	-0.016745	0.0273026	0.53967	NA	NA	cis	No
ENSG00000273338	1	ENSG00000273338	78470030	rs114365169	1	79198930	G	T	0.975724	0.00310284	0.0267297	0.907588	0.804619	0.216972	0.000208567	0.00385628	0.0332366	0.907632	0.394402	3	cis	No
ENSG00000223356	1	ENSG00000223356	156682004	rs12143060	1	156740026	G	T	0.94993	-0.0422629	0.0182778	0.0207639	-1.02431	0.180611	1.4168e-08	0.0412599	0.0192701	0.0322631	0.746993	3	cis	No
ENSG00000122420	1	PTGFR	78769568	rs674271	1	78712402	C	A	0.197596	0.00200603	0.00778907	0.796758	0.452991	0.115333	8.576665e-05	0.00442841	0.0172317	0.797185	0.0880451	7	cis	No
ENSG00000226084	1	RPL17P6	77594768	rs12079106	1	76780526	G	A	0.564659	-0.00347487	0.00678491	0.608549	0.292926	0.0713407	4.025414e-05	-0.0118626	0.023342	0.611307	NA	NA	cis	No
ENSG00000238279	1	ENSG00000238279	153506079	rs114787297	1	153216978	T	C	0.981793	0.00111655	0.0311354	0.971393	-1.08423	0.309556	0.000460862	-0.00102981	0.0287181	0.971395	NA	NA	cis	No
ENSG00000020129	1	NCDN	36023074	rs80196090	1	36984356	T	C	0.9169	-0.0126454	0.0109506	0.248188	-0.450634	0.126711	0.000375996	0.0280614	0.0255494	0.272065	NA	NA	cis	No
ENSG00000117620	1	SLC35A3	100435345	rs9628986	1	99956800	G	T	0.726541	-0.00235254	0.00775081	0.761493	0.341945	0.106585	0.00133566	-0.00687988	0.022768	0.762521	NA	NA	cis	No
ENSG00000143515	1	ATP8B2	154298029	rs4845653	1	154551368	G	A	0.847689	-0.000893553	0.00897005	0.92065	-0.63081	0.135372	3.164768e-06	0.00141652	0.0142231	0.920668	NA	NA	cis	No
ENSG00000235795	1	ENSG00000235795	101461029	rs2197446	1	102184150	G	A	0.917834	-0.0137356	0.0159519	0.389201	0.582177	0.171307	0.000677709	-0.0235935	0.0282663	0.403893	NA	NA	cis	No
ENSG00000130775	1	THEMIS2	28199055	rs34631302	1	28208327	A	G	0.354458	0.00747932	0.00674255	0.267312	-0.351925	0.0573222	8.282257e-10	-0.0212526	0.0194693	0.27501	NA	NA	cis	No
ENSG00000183615	1	FAM167B	32712834	rs80354093	1	32571122	C	T	0.98366	-0.0102378	0.0310422	0.741549	1.17791	0.270872	1.370141e-05	-0.0086915	0.0264293	0.742263	0.486531	7	cis	No
ENSG00000117000	1	RLF	40627045	rs113542571	1	40929775	T	C	0.951097	0.0040928	0.0173981	0.814019	-0.651333	0.167286	9.87916e-05	-0.00628373	0.0267602	0.814352	NA	NA	cis	No
ENSG00000142959	1	BEST4	45249257	rs1291048	1	44560673	C	T	0.909547	0.00912116	0.0108308	0.399703	-0.489161	0.13192	0.000208881	-0.0186465	0.0227055	0.411512	0.350824	5	cis	No
ENSG00000233084	1	RPL23AP25	249230780	rs7537031	1	248342837	C	A	0.186741	-0.0112564	0.00875633	0.198611	0.393584	0.119901	0.00102862	-0.0285997	0.0238928	0.231307	NA	NA	cis	No
ENSG00000159352	1	PSMD4	151227179	rs11204787	1	151199514	A	G	0.795868	0.00884623	0.00837043	0.290583	0.323495	0.0679577	1.933628e-06	0.0273458	0.026505	0.302202	0.347321	9	cis	No
ENSG00000206828	1	ENSG00000206828	144491442	rs11578204	1	150001721	G	T	0.65943	0.00890342	0.00706005	0.207273	0.250143	0.070869	0.000416107	0.0355933	0.0299714	0.235001	NA	NA	cis	No
ENSG00000197273	1	GUCA2A	42628362	rs77549955	1	42202509	G	A	0.978058	-0.0373866	0.0266718	0.160996	-1.04679	0.262403	6.62842e-05	0.0357155	0.0270068	0.186014	NA	NA	cis	No
ENSG00000127129	1	EDN2	41944446	rs12137480	1	41008442	T	G	0.937442	-0.00398018	0.0179508	0.824526	-0.738963	0.197215	0.000178974	0.00538617	0.0243344	0.824828	NA	NA	cis	No
ENSG00000228436	1	LOC105378663	39325672	rs61780928	1	39031923	G	A	0.917134	-0.017529	0.0153486	0.25343	-0.580289	0.140683	3.710398e-05	0.0302074	0.027445	0.271049	0.233041	3	cis	No
ENSG00000085999	1	RAD54L	46713360	rs114116689	1	46672900	G	A	0.86753	-0.00274264	0.0112047	0.80663	0.561404	0.140888	6.754946e-05	-0.00488532	0.019996	0.806987	0.613936	4	cis	No
ENSG00000132688	1	NES	156638555	rs191032888	1	156365532	C	T	0.977007	-0.015314	0.0261457	0.558065	-1.00158	0.262919	0.000139267	0.0152898	0.0264112	0.562647	NA	NA	cis	No
ENSG00000127423	1	AUNIP	26158414	rs377559996	1	26692437	C	T	0.981209	0.0291369	0.0327394	0.373485	-1.35669	0.341739	7.188354e-05	-0.0214765	0.0247307	0.385169	0.958661	3	cis	No
ENSG00000132718	1	SYT11	155829300	rs114525519	1	155151837	G	T	0.977241	0.0142784	0.0270863	0.598092	0.794761	0.266238	0.00283439	0.0179657	0.0346084	0.603682	NA	NA	cis	No
ENSG00000227733	1	LOC101927468	146093234	rs17160264	1	146969712	G	T	0.865196	-0.0131838	0.00888045	0.137654	-0.441628	0.127887	0.000553857	0.0298527	0.0218879	0.172602	NA	NA	cis	No
ENSG00000187634	1	SAMD11	860260	rs77335922	1	1714485	T	G	0.953431	-0.0116204	0.0200281	0.561775	1.24654	0.29201	1.965063e-05	-0.00932212	0.0162147	0.565346	NA	NA	cis	No
ENSG00000000938	1	FGR	27938575	rs115549190	1	28380165	C	T	0.964052	-0.0256152	0.0236608	0.278984	0.954133	0.263755	0.000297468	-0.0268466	0.0258849	0.299665	NA	NA	cis	No
ENSG00000117751	1	PPP1R8	28157289	rs189532370	1	27692651	C	A	0.981443	0.00763253	0.0297178	0.797307	-1.18165	0.324797	0.000274636	-0.00645921	0.025212	0.797799	NA	NA	cis	No
ENSG00000173207	1	CKS1B	154947129	rs1553611	1	154732308	A	G	0.122199	0.00297424	0.00922648	0.747181	-0.309706	0.0808547	0.000127934	-0.00960343	0.0298964	0.748041	NA	NA	cis	No
ENSG00000143603	1	KCNN3	154669931	rs76102976	1	154816174	G	A	0.86543	0.00756319	0.0100453	0.451504	-0.52665	0.125907	2.878827e-05	-0.0143609	0.0193805	0.458693	0.664227	4	cis	No
ENSG00000158714	1	SLAMF8	159796540	rs28695249	1	159151892	C	G	0.729458	-0.0009446	0.00764033	0.901605	0.452555	0.106767	2.247919e-05	-0.00208726	0.0168898	0.901647	0.225574	3	cis	No
ENSG00000185220	1	PGBD2	249200395	rs61856450	1	248328642	A	C	0.927404	0.00440922	0.0144053	0.759541	0.55662	0.160256	0.000514048	0.00792142	0.0259802	0.760441	NA	NA	cis	No
ENSG00000253368	1	TRNP1	27320198	rs4246508	1	27675317	A	G	0.685458	-0.0118141	0.00785395	0.132523	0.24543	0.0789857	0.00188824	-0.0481363	0.0355533	0.175762	NA	NA	cis	No
ENSG00000127124	1	HIVEP3	41972036	rs579448	1	41104664	G	A	0.513305	-0.0094554	0.00646096	0.143339	-0.317177	0.0916219	0.000536572	0.0298111	0.0221157	0.17767	NA	NA	cis	No
ENSG00000228192	1	ENSG00000228192	43300352	rs189644740	1	42747667	T	C	0.982376	-0.0317388	0.0298718	0.288009	-1.39243	0.395649	0.000432598	0.0227938	0.0224093	0.309079	NA	NA	cis	No
ENSG00000203814	1	H2BC18	149754245	rs115539008	1	150707381	T	C	0.978058	-0.000510171	0.0283157	0.985625	-0.894594	0.286436	0.00178901	0.000570282	0.0316525	0.985625	NA	NA	cis	No
ENSG00000253313	1	C1orf210	43747554	rs116240951	1	43719046	T	C	0.969421	-0.0018601	0.0221386	0.93304	-0.720309	0.185537	0.000103477	0.00258236	0.0307421	0.933056	NA	NA	cis	No
ENSG00000123080	1	CDKN2C	51426417	rs9729106	1	50706620	G	A	0.84493	-0.0149469	0.0123755	0.227128	-0.305293	0.0784079	9.874728e-05	0.0489592	0.0424419	0.248681	NA	NA	cis	No
ENSG00000155380	1	SLC16A1	113454469	rs80095204	1	114226875	C	T	0.981209	0.0285395	0.03187	0.370521	-1.12466	0.328497	0.000617848	-0.0253761	0.0292908	0.386297	NA	NA	cis	No
ENSG00000163479	1	SSR2	155978839	rs75538266	1	156556877	C	T	0.972339	0.0365319	0.0248753	0.141941	0.810731	0.229069	0.000401269	0.0450604	0.0332192	0.174953	NA	NA	cis	No
ENSG00000142655	1	PEX14	10532345	rs74052536	1	10891323	C	T	0.94176	-0.00106611	0.0119034	0.928634	0.416105	0.1202	0.00053663	-0.00256212	0.0286163	0.928658	NA	NA	cis	No
ENSG00000184678	1	H2BC21	149856010	rs115802109	1	150053389	T	C	0.954132	0.0106663	0.0206396	0.605304	0.696065	0.224457	0.00192795	0.0153237	0.0300607	0.610221	NA	NA	cis	No
ENSG00000229344	1	MTCO2P12	568137	rs2340592	1	910935	G	A	0.82423	-0.00912877	0.0101098	0.366547	-0.265315	0.0824912	0.00129863	0.0344073	0.0395781	0.384655	NA	NA	cis	No
ENSG00000272574	1	ENSG00000272574	162562893	rs12758316	1	162341613	C	G	0.936975	0.0163836	0.0148651	0.270396	0.713584	0.220537	0.0012136	0.0229596	0.022007	0.296815	NA	NA	cis	No
ENSG00000160789	1	LMNA	156052364	rs143290148	1	155966833	G	C	0.968254	0.0562422	0.024802	0.023351	-0.860184	0.246122	0.000474141	-0.0653839	0.0343709	0.057131	NA	NA	cis	No
ENSG00000116863	1	ADPRS	36554476	rs74619055	1	37510196	G	A	0.982726	-0.0387714	0.0318669	0.223731	0.933619	0.298747	0.00177738	-0.0415281	0.0366282	0.256889	NA	NA	cis	No
ENSG00000162825	1	NBPF20	144146808	rs12122368	1	145629765	T	C	0.223973	-0.0219381	0.00801809	0.00621758	-0.366622	0.0922118	7.012252e-05	0.0598385	0.0265484	0.0242002	NA	NA	cis	No
ENSG00000230869	10	ENSG00000230869	46174140	rs2279435	10	45923528	C	A	0.42472	-0.0172221	0.00673977	0.0106099	-0.505959	0.0563532	2.748315e-19	0.0340385	0.0138498	0.0139832	0.160577	20	cis	No
ENSG00000204177	10	BMS1P1	46737612	rs77426441	10	47544336	G	C	0.910831	0.0357061	0.0187413	0.0567534	0.513577	0.0865975	3.017944e-09	0.0695243	0.0383285	0.0696918	0.776364	3	cis	No
ENSG00000204174	10	NPY4R	47083534	rs61843782	10	47717283	G	T	0.577535	0.0198889	0.0141491	0.159825	-0.40693	0.0927653	1.15103e-05	-0.0488755	0.0365119	0.180695	0.785915	9	cis	No
ENSG00000204175	10	GPRIN2	46994087	rs74129818	10	47611194	C	T	0.921802	-0.0137478	0.0126416	0.276811	0.82769	0.164413	4.79832e-07	-0.0166098	0.0156257	0.287789	0.61456	9	cis	No
ENSG00000204179	10	PTPN20	46549955	rs3013936	10	49201964	G	A	0.659046	0.0142612	0.00988707	0.149187	-0.515638	0.0975584	1.254089e-07	-0.0276574	0.0198756	0.164067	NA	NA	cis	No
ENSG00000213412	10	HNRNPA1P33	47133338	rs118149679	10	47634730	C	A	0.952965	0.0566974	0.0242582	0.0194263	0.979096	0.184475	1.111639e-07	0.0579079	0.0270721	0.0324336	NA	NA	cis	No
ENSG00000138134	10	STAMBPL1	90639491	rs17114091	10	90666952	C	T	0.744048	0.0176354	0.00712826	0.0133605	-0.554143	0.0598739	2.138927e-20	-0.0318246	0.0133152	0.0168441	0.0934233	20	cis	No
ENSG00000099282	10	TSPAN15	71211229	rs16926411	10	71263605	C	T	0.835434	0.00513371	0.00977392	0.599412	0.672384	0.0684532	9.00463e-23	0.00763509	0.014557	0.599933	0.302085	20	cis	No
ENSG00000138346	10	DNA2	70173821	rs7916439	10	70240780	A	G	0.862979	-0.0364766	0.00932428	9.15356e-05	-1.04333	0.0662864	8.079378e-56	0.0349617	0.00920894	0.000146755	0.412003	20	cis	No
ENSG00000260400	10	ENSG00000260400	70458257	rs117104281	10	71322966	A	C	0.96592	-0.0189994	0.0244205	0.436562	-1.37908	0.259619	1.084687e-07	0.0137769	0.0178967	0.44142	NA	NA	cis	No
ENSG00000241058	10	NSUN6	18834490	rs4634984	10	18868840	A	T	0.396475	0.00416147	0.00741564	0.574678	0.703994	0.0501149	7.969826e-45	0.00591123	0.0105421	0.574983	0.331941	20	cis	No
ENSG00000233117	10	ENSG00000233117	4243333	rs1923407	10	4253584	G	T	0.630135	0.00050139	0.00764953	0.94774	-0.4033	0.0549951	2.244215e-13	-0.00124322	0.0189681	0.947742	0.98011	16	cis	No
ENSG00000132334	10	PTPRE	129705325	rs4751550	10	129704609	T	C	0.457983	-0.00891366	0.00652362	0.171824	0.466342	0.0909187	2.909458e-07	-0.019114	0.0144768	0.186727	0.362001	11	cis	No
ENSG00000099256	10	PRTFDC1	25137536	rs142985383	10	25245219	C	T	0.983777	0.0246282	0.0291573	0.398297	-1.82843	0.238408	1.728849e-14	-0.0134696	0.0160431	0.401138	0.222036	12	cis	No
ENSG00000120549	10	KIAA1217	23983675	rs7899691	10	24792171	C	G	0.778128	-0.0104479	0.00771626	0.175733	0.454151	0.103334	1.107729e-05	-0.0230053	0.0177786	0.195667	0.516707	15	cis	No
ENSG00000185875	10	THNSL1	25305587	rs1546097	10	25323839	T	G	0.686275	0.00016508	0.00679327	0.980613	0.339211	0.0604528	2.009643e-08	0.000486659	0.0200269	0.980613	0.399281	20	cis	No
ENSG00000152455	10	SUV39H2	14920819	rs11258840	10	14097152	T	C	0.461485	-0.0113915	0.00687132	0.0973499	0.277648	0.0711797	9.593076e-05	-0.0410286	0.0268908	0.127073	0.120637	15	cis	No
ENSG00000148468	10	FAM171A1	15253642	rs7900826	10	15382981	C	A	0.386321	0.00647113	0.00688617	0.347357	0.639144	0.0523535	2.808769e-34	0.0101247	0.0108059	0.348781	0.817567	20	cis	No
ENSG00000189129	10	PLAC9	81891438	rs12779139	10	81916355	T	C	0.891457	-0.0101162	0.0114073	0.375176	-0.822502	0.102269	8.797269e-16	0.0122993	0.0139531	0.378061	0.449154	20	cis	No
ENSG00000232229	10	LINC00865	91589267	rs3740040	10	91597426	T	C	0.860177	-0.0191632	0.0100959	0.05768	1.31281	0.0527036	5.900863e-137	-0.0145971	0.00771259	0.0584071	0.0074435	20	cis	No
ENSG00000165406	10	MARCHF8	45950035	rs112035106	10	46089925	C	T	0.942927	0.0251046	0.0133427	0.0599012	0.942559	0.111203	2.329964e-17	0.0266345	0.0145004	0.0662376	0.328966	20	cis	No
ENSG00000188234	10	AGAP4	46321042	rs10751383	10	45937992	A	C	0.437558	-0.0115718	0.00653711	0.0766985	0.660674	0.0657272	9.023631e-24	-0.0175151	0.0100469	0.0812736	0.147002	20	cis	No
ENSG00000120539	10	MASTL	27443753	rs10829201	10	27469101	T	C	0.360411	0.00344352	0.00664029	0.604054	1.11166	0.037505	4.517138e-193	0.00309764	0.00597422	0.604109	0.39991	20	cis	No
ENSG00000273363	10	ENSG00000273363	45454365	rs4494261	10	44947193	G	C	0.858427	-0.00677906	0.0106555	0.524645	-0.403382	0.103764	0.000101285	0.0168056	0.0267668	0.530102	0.870981	3	cis	No
ENSG00000107562	10	CXCL12	44793038	rs945565	10	44922902	C	T	0.550537	0.000781911	0.00652622	0.904633	0.345304	0.0876854	8.216784e-05	0.00226441	0.0189087	0.904677	0.76717	4	cis	No
ENSG00000077943	10	ITGA8	15555948	rs10906933	10	15631486	T	C	0.486345	-0.0140728	0.00652552	0.0310387	0.417236	0.0543635	1.655192e-14	-0.0337286	0.0162456	0.0378779	0.134332	20	cis	No
ENSG00000138193	10	PLCE1	95753746	rs1223583	10	95756500	A	G	0.535131	-0.0137759	0.0066486	0.0382658	-0.445723	0.0524358	1.890064e-17	0.0309069	0.0153532	0.0441084	0.0142727	20	cis	No
ENSG00000170312	10	CDK1	62538089	rs7086524	10	62558737	C	T	0.59232	0.00216777	0.00684166	0.751358	0.630982	0.0923453	8.324233e-12	0.00343555	0.0108545	0.751617	0.101418	20	cis	No
ENSG00000229417	10	NPM1P25	97949122	rs7907756	10	97170181	C	T	0.94176	0.0303588	0.0127223	0.0170206	0.748314	0.181848	3.870879e-05	0.0405696	0.019653	0.0389896	NA	NA	cis	No
ENSG00000134453	10	RBM17	6130950	rs41295361	10	6152993	A	G	0.980976	-0.000576581	0.0250919	0.981667	-1.03235	0.176296	4.747794e-09	0.000558513	0.0243058	0.981667	0.672318	15	cis	No
ENSG00000231298	10	MANCR	4692377	rs147982379	10	5718989	G	A	0.98261	-0.0121398	0.0339113	0.720353	1.17069	0.290691	5.643017e-05	-0.0103698	0.0290812	0.721406	NA	NA	cis	No
ENSG00000226688	10	ENTPD1-AS1	97512963	rs1981151	10	97840143	A	G	0.956816	0.00518804	0.0160739	0.746875	-1.52269	0.205757	1.357576e-13	-0.00340715	0.0105663	0.747108	0.0437739	16	cis	No
ENSG00000237489	10	C10orf143	131864638	rs147700557	10	131917420	G	A	0.868231	-0.0200627	0.0097229	0.0390704	0.79604	0.121161	5.028674e-11	-0.0252031	0.0128023	0.0489945	0.580227	12	cis	No
ENSG00000169129	10	AFAP1L2	116054583	rs66654016	10	115851567	T	C	0.842554	0.0105902	0.0100839	0.293624	0.690921	0.130203	1.11752e-07	0.0153277	0.0148779	0.302904	0.300922	17	cis	No
ENSG00000183621	10	ZNF438	31109136	rs4749651	10	31265011	T	A	0.488679	0.000778836	0.00643594	0.90368	0.306583	0.0560281	4.451188e-08	0.00254038	0.0209976	0.903704	0.432507	20	cis	No
ENSG00000237036	10	ZEB1-AS1	31495207	rs12416451	10	31152699	A	G	0.960201	-0.0268732	0.0188022	0.152932	-0.934157	0.255281	0.000252876	0.0287673	0.0216082	0.183086	NA	NA	cis	No
ENSG00000156042	10	CFAP70	75013517	rs57025413	10	75103697	T	C	0.938842	-0.0145946	0.0102563	0.154739	-0.974503	0.0820045	1.441372e-32	0.0149765	0.0105998	0.157687	0.151124	17	cis	No
ENSG00000156110	10	ADK	75910960	rs3750862	10	75851249	G	A	0.425187	0.0062971	0.00679577	0.354124	-0.569432	0.0523986	1.649858e-27	-0.0110586	0.0119776	0.355866	0.592994	20	cis	No
ENSG00000172650	10	AGAP5	75434033	rs151229713	10	75999969	C	T	0.978758	-0.0164722	0.0307202	0.591819	-1.44657	0.339986	2.092401e-05	0.0113871	0.0214046	0.594731	0.525868	4	cis	No
ENSG00000236756	10	DNAJC9-AS1	75007118	rs3763724	10	74930276	A	G	0.940476	-0.00423898	0.0128271	0.741045	-0.585393	0.100863	6.480325e-09	0.00724125	0.0219474	0.741448	0.180986	11	cis	No
ENSG00000272630	10	ENSG00000272630	74857802	rs7073970	10	75205471	G	A	0.938609	-0.0131182	0.0102549	0.20082	0.63504	0.0805192	3.099978e-15	-0.0206573	0.0163595	0.206693	0.0511633	20	cis	No
ENSG00000107679	10	PLEKHA1	124134212	rs2421011	10	124064829	A	G	0.489262	-0.0182521	0.00705034	0.00963034	0.614393	0.0863536	1.120368e-12	-0.0297075	0.0122113	0.0149832	0.120148	20	cis	No
ENSG00000107745	10	MICU1	74127098	rs9416017	10	74100279	T	C	0.367997	-0.0177843	0.00701406	0.0112279	-0.472506	0.0679979	3.683294e-12	0.0376383	0.0158017	0.0172231	0.489792	20	cis	No
ENSG00000107758	10	PPP3CB	75196186	rs11000814	10	75700056	C	T	0.754318	0.00186716	0.00864258	0.828955	0.242251	0.0656666	0.000225043	0.00770754	0.0357373	0.829243	NA	NA	cis	No
ENSG00000148719	10	DNAJB12	74092588	rs9416019	10	74125582	A	G	0.357726	-0.0159509	0.00700242	0.0227321	-0.564232	0.0539417	1.318081e-25	0.0282701	0.0127014	0.0260312	0.305153	20	cis	No
ENSG00000151468	10	CCDC3	12938627	rs503672	10	13066423	G	C	0.297269	0.0126164	0.00738356	0.087503	0.340294	0.0604068	1.76715e-08	0.037075	0.0226738	0.102017	0.0462778	19	cis	No
ENSG00000156398	10	SFXN2	104474295	rs2902548	10	104487382	C	T	0.838936	-0.00516353	0.00811541	0.524606	-1.00511	0.0623851	2.122429e-58	0.00513728	0.00808044	0.524928	0.00125201	20	cis	No
ENSG00000166272	10	WBP1L	104503727	rs12244388	10	104640052	G	A	0.637177	-0.00193754	0.00660962	0.769415	0.405451	0.105037	0.000113351	-0.00477873	0.0163488	0.770059	0.0838065	14	cis	No
ENSG00000148606	10	POLR3A	79734907	rs7098061	10	79368226	C	T	0.727591	0.00288024	0.00762433	0.705602	-0.411723	0.109728	0.000175289	-0.00699558	0.0186117	0.707014	NA	NA	cis	No
ENSG00000237149	10	ZNF503-AS2	77160759	rs61859880	10	76999117	A	G	0.977124	-0.00236713	0.0274505	0.931282	-1.20989	0.29274	3.580741e-05	0.00195648	0.0226934	0.931296	NA	NA	cis	No
ENSG00000107537	10	PHYH	13319796	rs12570229	10	13341185	C	T	0.315826	-0.00421675	0.00698376	0.54598	-0.78767	0.0519589	6.558005e-52	0.00535345	0.00887338	0.546299	0.0878261	20	cis	No
ENSG00000107949	10	BCCIP	127512115	rs4962539	10	127945472	A	G	0.750497	0.00958118	0.00883237	0.278019	0.410426	0.102712	6.445624e-05	0.0233445	0.0222989	0.295151	0.459737	6	cis	No
ENSG00000151025	10	GPR158	25463991	rs2807242	10	25490678	T	A	0.914837	0.0277892	0.0100059	0.0054814	1.33985	0.162125	1.405078e-16	0.0207405	0.00787834	0.00847338	0.608698	20	cis	No
ENSG00000119938	10	PPP1R3C	93388199	rs10786004	10	93368721	G	C	0.3345	0.00903383	0.00717597	0.208066	0.402559	0.100939	6.659565e-05	0.022441	0.0186929	0.229941	0.940807	11	cis	No
ENSG00000148680	10	HTR7	92500578	rs72824636	10	92210457	C	T	0.673669	-0.00400437	0.00789701	0.612102	-0.276885	0.0765929	0.000300325	0.0144622	0.0288001	0.615556	0.830906	9	cis	No
ENSG00000204130	10	RUFY2	70100864	rs7078365	10	70154576	C	T	0.904295	-0.0414623	0.0103288	5.9638e-05	0.692336	0.103795	2.55452e-11	-0.0598875	0.0174121	0.000582954	0.71217	20	cis	No
ENSG00000077420	10	APBB1IP	26727132	rs9299821	10	26722759	G	A	0.390523	0.00265354	0.00711912	0.709346	-0.312709	0.0592476	1.306009e-07	-0.00848565	0.0228227	0.710036	0.695392	15	cis	No
ENSG00000138162	10	TACC2	123748689	rs9420342	10	123788087	C	T	0.635037	-0.00921491	0.00669205	0.168514	0.279529	0.056858	8.82116e-07	-0.0329658	0.0248618	0.184852	0.172185	11	cis	No
ENSG00000226864	10	ATE1-AS1	123687827	rs10887024	10	123688152	A	T	0.681139	0.00403764	0.00676734	0.55075	-0.936866	0.0488596	6.026662e-82	-0.00430973	0.00722688	0.550943	0.104445	20	cis	No
ENSG00000169740	10	ZNF32	44139307	rs2999240	10	44020708	C	T	0.338936	-0.00508288	0.00771847	0.510195	0.352876	0.0604671	5.352334e-09	-0.0144042	0.0220119	0.512866	0.554876	18	cis	No
ENSG00000096717	10	SIRT1	69644427	rs10997875	10	69679824	T	C	0.329599	0.016869	0.00713639	0.0180887	-0.522155	0.0581086	2.56751e-19	-0.0323065	0.0141322	0.0222527	0.282999	20	cis	No
ENSG00000108176	10	DNAJC12	69556427	rs7895297	10	69334199	G	A	0.891573	-0.0164051	0.00928148	0.0771426	0.716729	0.139275	2.658929e-07	-0.0228888	0.0136923	0.0945919	0.877303	20	cis	No
ENSG00000272892	10	ENSG00000272892	69609283	rs35858192	10	69583855	A	G	0.349901	0.0183969	0.00713019	0.0098759	0.425064	0.0998394	2.067461e-05	0.0432803	0.0196143	0.0273444	0.829535	13	cis	No
ENSG00000152465	10	NMT2	15144583	rs10508483	10	15179377	A	T	0.834384	-0.00240253	0.0100705	0.811438	-0.390742	0.0701513	2.547511e-08	0.00614864	0.0257964	0.811608	0.995887	18	cis	No
ENSG00000165757	10	JCAD	30301729	rs1807796	10	30099511	G	A	0.744631	-0.0128236	0.00826331	0.120693	-0.276012	0.0672289	4.033437e-05	0.0464603	0.0320056	0.146605	NA	NA	cis	No
ENSG00000151150	10	ANK3	61786056	rs879806	10	61922994	G	A	0.956583	0.0134083	0.0112819	0.234647	-0.596476	0.120886	8.048108e-07	-0.0224792	0.0194552	0.247913	0.214547	6	cis	No
ENSG00000165511	10	ZNF22-AS1	45493146	rs7478211	10	45548366	A	G	0.187558	0.0130476	0.00806466	0.105689	-0.496069	0.068101	3.233026e-13	-0.026302	0.0166533	0.114247	0.379698	20	cis	No
ENSG00000150867	10	PIP4K2A	22823778	rs10430590	10	22833063	A	T	0.677638	0.0218049	0.00680316	0.0013501	-0.444856	0.0586721	3.400789e-14	-0.0490156	0.0166032	0.00315539	0.878024	20	cis	No
ENSG00000165312	10	OTUD1	23728198	rs1039966	10	23656316	A	G	0.541083	0.00164277	0.00691432	0.8122	0.274969	0.0683029	5.679954e-05	0.00597438	0.0251896	0.81252	0.144278	7	cis	No
ENSG00000107890	10	ANKRD26	27280843	rs76009984	10	27442244	G	A	0.950047	-0.0360844	0.016853	0.0322637	1.10657	0.114744	5.219404e-22	-0.0326092	0.0156008	0.0365972	0.389056	20	cis	No
ENSG00000148655	10	LRMDA	77360998	rs7078507	10	77140864	A	G	0.392974	-0.00748561	0.00654863	0.253005	0.79781	0.047697	8.384654e-63	-0.0093827	0.0082274	0.254111	0.0270468	20	cis	No
ENSG00000138286	10	FAM149B1	74927924	rs16930450	10	75005282	T	C	0.943394	-0.015325	0.0104935	0.144173	0.87805	0.113791	1.196977e-14	-0.0174534	0.0121631	0.1513	0.503341	11	cis	No
ENSG00000166321	10	NUDT13	74870217	rs9971273	10	74873746	A	G	0.940126	-0.0151034	0.0102222	0.139539	-1.34911	0.0720345	2.89139e-78	0.0111951	0.00760054	0.140769	0.457015	11	cis	No
ENSG00000166348	10	USP54	75257296	rs111747569	10	75319354	A	C	0.961718	-0.0272437	0.0144762	0.0598415	0.98379	0.232497	2.322362e-05	-0.0276926	0.0161045	0.0855126	0.0717918	10	cis	No
ENSG00000182180	10	MRPS16	75006510	rs112745406	10	74954530	C	T	0.944094	-0.0130385	0.010529	0.215588	0.493681	0.115259	1.8421e-05	-0.0264108	0.022201	0.234196	0.468059	11	cis	No
ENSG00000196968	10	FUT11	75532049	rs3870406	10	75474261	C	T	0.383698	-0.0195805	0.0124338	0.115305	0.315548	0.0545068	7.074335e-09	-0.0620524	0.0408357	0.128621	0.0367386	10	cis	No
ENSG00000213551	10	DNAJC9	74943120	rs73272389	10	75393153	T	C	0.957866	-0.0314269	0.014266	0.0276005	-0.727725	0.109556	3.084301e-11	0.0431851	0.0206535	0.0365339	0.213017	14	cis	No
ENSG00000214655	10	ZSWIM8	75545340	rs11000695	10	75265602	C	T	0.913165	-0.0242359	0.00929714	0.00913894	-0.647088	0.156916	3.727134e-05	0.0374538	0.0169976	0.0275616	0.327452	17	cis	No
ENSG00000268584	10	ENSG00000268584	75385754	rs80316050	10	75384705	T	C	0.961718	-0.0281084	0.0144858	0.0523292	0.913327	0.212119	1.66439e-05	-0.0307758	0.0173967	0.0768828	0.617994	11	cis	No
ENSG00000272599	10	ENSG00000272599	74884331	rs58682074	10	74940827	C	T	0.939893	-0.0154759	0.010335	0.134283	-0.652614	0.10009	7.017391e-11	0.0237137	0.0162486	0.144446	0.645016	11	cis	No
ENSG00000165512	10	ZNF22	45495923	rs7915377	10	45523336	T	A	0.939542	0.0155429	0.0125345	0.21497	0.808893	0.132731	1.099658e-09	0.019215	0.0158134	0.224324	0.128231	13	cis	No
ENSG00000271335	10	ENSG00000271335	35603480	rs7069196	10	35701958	T	C	0.655812	0.0130041	0.00667074	0.0512441	0.992124	0.0426392	9.37963e-120	0.0131073	0.00674725	0.0520624	0.148359	20	cis	No
ENSG00000108187	10	PBLD	70042417	rs4142048	10	70044031	T	C	0.810341	-0.00880108	0.00766782	0.251054	0.562415	0.0632658	6.126583e-19	-0.0156487	0.0137469	0.254976	0.0342775	20	cis	No
ENSG00000122912	10	SLC25A16	70237756	rs10998205	10	70227964	C	T	0.90943	-0.0440546	0.0106375	3.45155e-05	0.694057	0.119533	6.382071e-09	-0.063474	0.0188256	0.000747115	0.000414561	20	cis	No
ENSG00000198873	10	GRK5	120967101	rs74919261	10	120253405	G	A	0.949113	0.0214472	0.0168427	0.202883	-0.523064	0.131273	6.761082e-05	-0.041003	0.0338044	0.22515	NA	NA	cis	No
ENSG00000187021	10	PNLIPRP1	118349897	rs76400827	10	118326712	T	A	0.920985	0.0085399	0.0135059	0.527186	-0.455434	0.110656	3.85891e-05	-0.0187511	0.0300029	0.531987	0.723042	4	cis	No
ENSG00000183346	10	CABCOCO1	63422719	rs11815699	10	63426226	A	G	0.927871	-0.0186085	0.0106309	0.0800464	1.49587	0.0835286	1.01281e-71	-0.0124399	0.0071407	0.0814884	0.0424988	20	cis	No
ENSG00000107789	10	MINPP1	89264632	rs59980852	10	89275746	C	T	0.536765	0.00266142	0.0114388	0.816021	-0.271149	0.0588458	4.069745e-06	-0.00981534	0.0422401	0.816251	0.19356	4	cis	No
ENSG00000099290	10	WASHC2A	51827648	rs3793805	10	51049027	A	G	0.567344	-0.0164153	0.00676126	0.0151888	0.507874	0.0533078	1.615868e-21	-0.0323216	0.0137383	0.0186398	0.041763	20	cis	No
ENSG00000235618	10	FAM21EP	51780942	rs12411414	10	51832220	A	G	0.804175	0.0145394	0.010083	0.149309	0.455338	0.0714479	1.853522e-10	0.031931	0.0227037	0.159599	0.0551782	4	cis	No
ENSG00000107669	10	ATE1	123499939	rs10887024	10	123688152	A	T	0.681139	0.00403764	0.00676734	0.55075	0.521812	0.0587842	6.884487e-19	0.00773773	0.0129982	0.551648	0.159679	20	cis	No
ENSG00000095574	10	IKZF5	124750322	rs9423306	10	124763196	A	G	0.301004	-0.00631389	0.00699435	0.366678	0.451041	0.0563157	1.154956e-15	-0.0139985	0.0156053	0.369701	0.583337	16	cis	No
ENSG00000254635	10	ENSG00000254635	28811581	rs1034086	10	28934523	A	C	0.437442	-0.0157239	0.00718387	0.0286128	-0.644588	0.0503642	1.670665e-37	0.0243937	0.0113067	0.0309701	0.0909858	20	cis	No
ENSG00000107874	10	CUEDC2	104183002	rs3127252	10	103336677	T	C	0.902894	0.0287744	0.0132367	0.0297176	-0.594276	0.152188	9.427601e-05	-0.0484193	0.0254925	0.0575183	NA	NA	cis	No
ENSG00000120029	10	ARMH3	103605356	rs77566741	10	103466341	A	T	0.968721	-0.00536341	0.0151586	0.723473	0.65313	0.14565	7.317071e-06	-0.00821186	0.0232813	0.724296	0.432256	4	cis	No
ENSG00000086475	10	SEPHS1	13359424	rs7902331	10	13388412	C	T	0.925187	0.0297259	0.014122	0.035297	-0.825561	0.102194	6.564257e-16	-0.0360069	0.0176771	0.0416577	0.824745	9	cis	No
ENSG00000065621	10	GSTO2	106028631	rs568526	10	106033439	T	C	0.654295	-0.00196958	0.00683334	0.77317	0.577883	0.0525225	3.713198e-28	-0.00340827	0.0118288	0.773246	0.476768	20	cis	No
ENSG00000107960	10	STN1	105642300	rs11813268	10	105682296	C	T	0.835784	0.0193441	0.00864743	0.025288	-0.442026	0.0659128	1.997282e-11	-0.0437624	0.0206228	0.0338349	0.0488314	16	cis	No
ENSG00000148834	10	GSTO1	105995114	rs2282326	10	106020398	A	C	0.634804	-0.00236881	0.00677544	0.726626	0.673256	0.05199	2.358065e-38	-0.00351844	0.0100674	0.726722	0.458777	20	cis	No
ENSG00000148841	10	ITPRIP	106071894	rs6584596	10	106110348	G	C	0.681256	0.00265254	0.00714727	0.710544	0.432883	0.0580087	8.497247e-14	0.00612761	0.0165313	0.710885	0.272804	20	cis	No
ENSG00000189180	10	ZNF33A	38299578	rs2505220	10	38351891	G	A	0.754473	0.00950623	0.0119635	0.426845	-0.498797	0.0660106	4.146279e-14	-0.0190583	0.024117	0.429384	0.334261	20	cis	No
ENSG00000198105	10	ZNF248	38091751	rs2753883	10	38150662	G	T	0.746148	-0.00173346	0.00725314	0.81111	-0.719042	0.0811309	7.807264e-19	0.00241079	0.0100909	0.811177	0.642486	19	cis	No
ENSG00000226578	10	ENSG00000226578	38064299	rs1208591	10	38212502	A	T	0.235528	-0.00884169	0.00772928	0.252656	0.470818	0.0869823	6.20458e-08	-0.0187794	0.0167793	0.263054	0.653966	20	cis	No
ENSG00000236514	10	ENSG00000236514	38146668	rs2168603	10	38951875	C	T	0.587475	0.0148978	0.0129972	0.2517	-0.363651	0.0712167	3.285926e-07	-0.0409673	0.0366303	0.263396	0.172859	20	cis	No
ENSG00000175395	10	ZNF25	38238500	rs7093569	10	37874477	A	C	0.915033	0.028666	0.0129904	0.0273351	0.834988	0.116581	7.933613e-13	0.034331	0.0162793	0.0349548	0.997735	6	cis	No
ENSG00000130640	10	TUBGCP2	135093135	rs3789323	10	135179113	G	A	0.356209	0.018071	0.00845118	0.0324938	-0.392681	0.0906173	1.46823e-05	-0.0460195	0.0239993	0.0551693	0.176027	8	cis	No
ENSG00000130649	10	CYP2E1	135333910	rs2297031	10	135232654	C	T	0.785714	-0.00262655	0.00767614	0.732222	-0.593599	0.0682798	3.5106e-18	0.00442479	0.0129415	0.732422	0.82764	20	cis	No
ENSG00000151651	10	ADAM8	135075907	rs3008325	10	135086676	A	G	0.101424	-0.00481344	0.0116147	0.678561	-0.437114	0.102347	1.947001e-05	0.0110119	0.0266961	0.679981	0.133102	9	cis	No
ENSG00000151553	10	FHIP2A	116581503	rs7072364	10	116620840	G	A	0.606092	0.0105659	0.0074075	0.15376	-0.390882	0.0573593	9.451359e-12	-0.0270309	0.0193614	0.162677	0.718925	20	cis	No
ENSG00000165832	10	TRUB1	116697952	rs76893629	10	116728224	G	A	0.970705	0.00877853	0.0210409	0.676523	1.27794	0.141901	2.139947e-19	0.00686928	0.0164824	0.67685	0.281959	20	cis	No
ENSG00000107736	10	CDH23	73156691	rs11592462	10	73550117	C	G	0.508754	0.00347757	0.00680697	0.609433	0.466956	0.0690956	1.397971e-11	0.00744732	0.0146189	0.610451	0.901215	20	cis	No
ENSG00000197746	10	PSAP	73576055	rs4747200	10	73574405	A	G	0.711951	-0.00385567	0.0070298	0.583366	0.543113	0.057909	6.677091e-21	-0.0070992	0.0129656	0.584008	0.834252	20	cis	No
ENSG00000203791	10	EEF1AKMT2	126436718	rs10901819	10	126458373	G	A	0.433123	-0.00567535	0.00646295	0.379869	-0.847098	0.0435372	2.549416e-84	0.00669976	0.00763729	0.380355	0.65004	20	cis	No
ENSG00000107902	10	LHPP	126150403	rs71488605	10	126166801	G	A	0.814426	-0.00447286	0.00853204	0.60011	0.662665	0.0690778	8.553561e-22	-0.00674981	0.0128946	0.600653	0.874548	17	cis	No
ENSG00000165650	10	PDZD8	119040000	rs181440	10	119103471	A	C	0.461368	0.00878832	0.00654445	0.179315	0.818558	0.0457994	1.925483e-71	0.0107363	0.00801763	0.180541	0.933937	20	cis	No
ENSG00000165868	10	HSPA12A	118430703	rs12259865	10	118455097	G	A	0.484095	0.000431405	0.0106475	0.967681	-0.595439	0.0530147	2.853114e-29	-0.000724516	0.0178819	0.967681	0.899814	11	cis	No
ENSG00000122863	10	CHST3	73724123	rs1245581	10	73778607	G	C	0.531809	-0.0160101	0.00680151	0.0185772	0.536461	0.0672277	1.466122e-15	-0.0298439	0.0132186	0.0239629	0.143951	19	cis	No
ENSG00000165730	10	STOX1	70587298	rs11812559	10	70599126	G	A	0.86683	-0.00352287	0.0098136	0.719611	1.29844	0.0605471	5.07105e-102	-0.00271316	0.00755905	0.719649	0.653563	20	cis	No
ENSG00000198954	10	KIFBP	70748487	rs1007042	10	70616973	T	G	0.457283	0.00270885	0.00646049	0.675001	-0.225021	0.0549978	4.286791e-05	-0.0120382	0.028861	0.676598	0.765159	3	cis	No
ENSG00000165322	10	ARHGAP12	32094365	rs11008710	10	32261726	T	G	0.813725	0.0046579	0.00767148	0.543737	-0.756996	0.0976531	9.053596e-15	-0.00615314	0.0101651	0.544968	0.490808	20	cis	No
ENSG00000107937	10	GTPBP4	1034338	rs117600309	10	1155875	G	A	0.982026	0.00533228	0.0294115	0.856133	-1.17932	0.184637	1.688949e-10	-0.00452149	0.0249494	0.85619	0.122603	8	cis	No
ENSG00000107742	10	SPOCK2	73818793	rs1245510	10	73799959	G	A	0.49253	-0.00780682	0.00651291	0.230656	0.349037	0.0721632	1.31965e-06	-0.0223667	0.0192241	0.244638	0.309181	20	cis	No
ENSG00000182010	10	RTKN2	63942794	rs79987490	10	64039517	C	T	0.952148	0.00390959	0.0173995	0.822216	-0.837054	0.185636	6.509959e-06	-0.00467065	0.0208124	0.822433	0.873196	4	cis	No
ENSG00000120055	10	C10orf95	104209594	rs77516398	10	104216605	G	T	0.730159	0.00213483	0.00768496	0.781171	0.741998	0.0955921	8.351694e-15	0.00287714	0.0103637	0.781308	0.799872	20	cis	No
ENSG00000166197	10	NOLC1	103911933	rs72845696	10	104187404	C	T	0.78303	-0.000179199	0.00819815	0.982561	0.396363	0.105655	0.000175785	-0.000452108	0.0206838	0.982561	0.640891	3	cis	No
ENSG00000138326	10	RPS24	79793518	rs7071351	10	79794073	C	A	0.392857	-0.0031337	0.00672996	0.641477	0.544317	0.0540808	7.897706e-24	-0.00575712	0.0123773	0.641833	0.846759	20	cis	No
ENSG00000213513	10	ENSG00000213513	79540095	rs1248889	10	79699288	G	A	0.391106	-0.0301615	0.00661126	5.06331e-06	0.493104	0.0562183	1.767056e-18	-0.0611666	0.0151126	5.178941e-05	0.20825	20	cis	No
ENSG00000138138	10	ATAD1	89511269	rs1819162	10	89527210	C	A	0.702148	-0.0083644	0.00744662	0.261332	-0.399941	0.0603807	3.504293e-11	0.0209141	0.0188851	0.268105	0.645293	19	cis	No
ENSG00000272734	10	ENSG00000272734	88725102	rs12762130	10	87736865	C	A	0.822246	-0.0138145	0.00964533	0.152073	-0.483275	0.115779	2.99139e-05	0.0285852	0.0211005	0.175508	NA	NA	cis	No
ENSG00000185532	10	PRKG1	52750945	rs116547785	10	52749976	T	C	0.985644	0.110328	0.0337945	0.00109587	-0.892041	0.180502	7.732487e-07	-0.12368	0.0454043	0.00645007	0.0297048	4	cis	No
ENSG00000197142	10	ACSL5	114133776	rs11195910	10	114109555	T	A	0.739846	0.0089667	0.00745968	0.229355	0.326734	0.0624329	1.66452e-07	0.0274434	0.0234255	0.241391	0.522979	11	cis	No
ENSG00000156510	10	HKDC1	70980059	rs10082520	10	70991196	G	T	0.61753	0.00268269	0.0069383	0.699016	0.588149	0.092088	1.693781e-10	0.00456124	0.0118184	0.699539	0.282496	13	cis	No
ENSG00000229261	10	LOC101928994	70975089	rs10082520	10	70991196	G	T	0.61753	0.00268269	0.0069383	0.699016	0.42051	0.054469	1.16169e-14	0.00637961	0.0165204	0.699374	0.360606	20	cis	No
ENSG00000138182	10	KIF20B	91461367	rs56189305	10	91459860	G	A	0.518908	0.00965235	0.00644255	0.134077	0.629961	0.0486136	2.10204e-38	0.0153221	0.010295	0.136671	0.000115492	20	cis	No
ENSG00000152782	10	PANK1	91342745	rs7905382	10	91428640	T	C	0.510971	0.0215392	0.00642897	0.000807153	0.997205	0.0353973	1.296181e-174	0.0215996	0.00649242	0.000878208	1.570791e-07	20	cis	No
ENSG00000240996	10	ENSG00000240996	91454052	rs7912591	10	91433432	C	A	0.511321	0.0214645	0.00642715	0.00083882	0.462423	0.0847421	4.847201e-08	0.0464175	0.0162953	0.00439224	0.00356094	10	cis	No
ENSG00000198018	10	ENTPD7	101419263	rs7072263	10	101367645	G	A	0.714052	0.0624807	0.00737758	2.4751e-17	-0.63979	0.0997481	1.416988e-10	-0.0976581	0.0190995	3.168624e-07	0.0420925	20	cis	No
ENSG00000148600	10	CDHR1	85954410	rs11200916	10	85958126	C	T	0.91725	-0.014966	0.0107578	0.164172	0.754573	0.143057	1.330223e-07	-0.0198337	0.0147443	0.178568	0.683485	4	cis	No
ENSG00000187908	10	DMBT1	124320181	rs2981816	10	124316554	A	G	0.316103	-0.01279	0.00744765	0.0859213	-0.663705	0.054747	7.964991e-34	0.0192706	0.0113334	0.0890661	0.462453	12	cis	No
ENSG00000152778	10	IFIT5	91174343	rs303208	10	91165833	C	T	0.758403	-0.0124913	0.00719127	0.0823867	-0.945148	0.0524638	1.478911e-72	0.0132162	0.0076439	0.0838108	0.460506	20	cis	No
ENSG00000151474	10	FRMD4A	13685706	rs17544732	10	13742395	T	C	0.629202	-0.013142	0.00722613	0.0689595	-0.286514	0.058462	9.541892e-07	0.0458686	0.0269015	0.0881831	0.215104	8	cis	No
ENSG00000183049	10	CAMK1D	12391481	rs2768362	10	12482534	A	G	0.276342	-0.0104125	0.010542	0.323293	0.321654	0.0636975	4.424757e-07	-0.0323717	0.0333954	0.332372	0.4645	3	cis	No
ENSG00000065665	10	SEC61A2	12171636	rs10906094	10	12214260	C	G	0.516223	-0.00512503	0.00646478	0.427917	0.564357	0.0692685	3.718698e-16	-0.00908118	0.0115092	0.430091	0.76736	20	cis	No
ENSG00000165646	10	SLC18A2	119000604	rs77528738	10	119165454	G	T	0.967087	0.0316762	0.023844	0.184022	-1.16761	0.242572	1.483399e-06	-0.0271291	0.0211847	0.200334	0.519426	6	cis	No
ENSG00000136754	10	ABI1	27035522	rs7910986	10	27149446	T	G	0.924136	0.00252773	0.0113741	0.824131	0.566351	0.107302	1.305121e-07	0.00446319	0.0201009	0.824284	0.298787	11	cis	No
ENSG00000122870	10	BICC1	60272900	rs12358952	10	60379299	A	C	0.582983	-0.000177217	0.00655456	0.97843	-0.441571	0.0721208	9.202708e-10	0.000401333	0.0148439	0.97843	0.00147004	14	cis	No
ENSG00000224597	10	SVIL-AS1	29698331	rs7910070	10	29766008	A	G	0.632003	0.00175757	0.00656703	0.788979	0.745045	0.0529034	4.823666e-45	0.00235901	0.00881586	0.789017	0.806216	20	cis	No
ENSG00000122873	10	CISD1	60028818	rs2790188	10	60042186	G	A	0.796452	0.0146217	0.00739053	0.0478793	-0.669182	0.0554007	1.364633e-33	-0.0218501	0.0111913	0.0508883	0.130968	20	cis	No
ENSG00000203497	10	ENSG00000203497	112629626	rs17128067	10	112607918	A	G	0.909197	0.0136641	0.0105932	0.197089	-0.558625	0.116409	1.59614e-06	-0.0244602	0.0196361	0.212883	0.163061	8	cis	No
ENSG00000107611	10	CUBN	16865963	rs7100163	10	17181177	C	T	0.696312	-0.000940559	0.00736171	0.898336	0.579623	0.0777089	8.724814e-14	-0.00162271	0.0127027	0.898351	0.77701	12	cis	No
ENSG00000225213	10	ENSG00000225213	16763351	rs4748314	10	16767367	C	T	0.533147	0.00500277	0.00645695	0.438465	0.595933	0.0689203	5.301229e-18	0.00839485	0.0108784	0.440294	0.799975	20	cis	No
ENSG00000204147	10	ASAH2B	52499078	rs9732692	10	52521483	T	A	0.162028	0.0547712	0.0190516	0.00404168	-1.18213	0.0619179	2.948256e-81	-0.0463326	0.016298	0.00447139	0.0599806	20	cis	No
ENSG00000148848	10	ADAM12	127700950	rs11245128	10	128435401	C	T	0.938259	-0.0197718	0.0140576	0.159582	-0.566825	0.117553	1.422171e-06	0.0348817	0.0258341	0.176946	NA	NA	cis	No
ENSG00000188611	10	ASAH2	51942538	rs9732483	10	52521538	A	G	0.249503	0.0290506	0.0139991	0.0379708	1.11725	0.0557971	3.440378e-89	0.0260019	0.0125971	0.0390063	0.0522089	20	cis	No
ENSG00000107518	10	ATRNL1	116853124	rs7099565	10	116719543	G	A	0.535714	0.0125007	0.00720483	0.0827333	-0.475146	0.068103	3.018236e-12	-0.0263092	0.0156253	0.0922281	0.253071	20	cis	No
ENSG00000165863	10	C10orf82	118423207	rs3010455	10	118426048	C	T	0.556256	0.00660259	0.00724262	0.361963	-0.513595	0.0546379	5.457464e-21	-0.0128556	0.014168	0.36421	0.318784	20	cis	No
ENSG00000171862	10	PTEN	89622870	rs662115	10	89772989	C	T	0.545051	-0.0126027	0.00640919	0.0492587	-0.366279	0.0884979	3.490627e-05	0.0344074	0.0193725	0.0757178	0.0541301	10	cis	No
ENSG00000152766	10	ANKRD22	90581889	rs17114091	10	90666952	C	T	0.744048	0.0176354	0.00712826	0.0133605	-0.480311	0.0605229	2.08763e-15	-0.0367166	0.0155454	0.0181814	0.025607	20	cis	No
ENSG00000180139	10	ACTA2-AS1	90692400	rs6586154	10	90661135	T	C	0.744631	0.0184846	0.00712389	0.00946661	-0.473543	0.101839	3.320572e-06	-0.0390347	0.0172275	0.0234615	0.0702762	10	cis	No
ENSG00000138161	10	CUZD1	124591665	rs1008720	10	125446373	C	T	0.103291	0.0171429	0.0110264	0.120016	0.413727	0.10056	3.884841e-05	0.0414353	0.0284908	0.145852	0.678681	5	cis	No
ENSG00000255624	10	ENSG00000255624	124639246	rs11200431	10	123904884	A	G	0.898459	0.00204543	0.0126668	0.871715	0.550866	0.141085	9.442174e-05	0.00371312	0.023014	0.871824	NA	NA	cis	No
ENSG00000198825	10	INPP5F	121485609	rs10886531	10	121446703	G	A	0.595588	0.00111421	0.00682529	0.870324	0.296706	0.0751484	7.871795e-05	0.00375527	0.0230232	0.870433	NA	NA	cis	No
ENSG00000165733	10	BMS1	43278249	rs4949033	10	43279472	G	T	0.697712	0.0028322	0.00684843	0.6792	-0.348251	0.0730205	1.849393e-06	-0.00813264	0.019739	0.680333	0.388154	17	cis	No
ENSG00000198298	10	ZNF485	44101855	rs11238575	10	44015907	A	G	0.709851	0.0130768	0.00818043	0.109922	-0.297496	0.0623358	1.819771e-06	-0.0439562	0.0289991	0.129576	0.162068	10	cis	No
ENSG00000215146	10	LOC441666	42827314	rs2505807	10	42868071	T	C	0.58415	-0.00704859	0.00653951	0.281102	0.960351	0.0395996	6.372751e-130	-0.0073396	0.00681622	0.281577	0.62745	20	cis	No
ENSG00000243660	10	ZNF487	43932282	rs2484671	10	44201902	G	C	0.906629	-0.0107698	0.014287	0.450959	0.651783	0.168122	0.000105824	-0.0165236	0.0223304	0.459324	NA	NA	cis	No
ENSG00000108091	10	CCDC6	61548521	rs80051642	10	61696476	A	G	0.744514	0.00584921	0.00835215	0.483725	-0.52823	0.071656	1.684001e-13	-0.0110732	0.0158828	0.485687	0.936254	20	cis	No
ENSG00000148459	10	PDSS1	26986588	rs1780181	10	26998155	C	T	0.403361	0.000914673	0.00651139	0.888287	0.378187	0.056017	1.46542e-11	0.00241857	0.0172211	0.888311	0.668489	20	cis	No
ENSG00000170430	10	MGMT	131265448	rs1008982	10	131445731	T	C	0.617297	-0.00520388	0.00725119	0.472968	-0.893319	0.0456478	2.7972e-85	0.00582533	0.00812259	0.473265	0.0299969	20	cis	No
ENSG00000216937	10	CCDC7	32735068	rs2990974	10	32766420	C	T	0.829132	0.0126978	0.00828375	0.125312	1.04644	0.0706556	1.254184e-49	0.0121343	0.00795841	0.127331	0.107402	20	cis	No
ENSG00000148700	10	ADD3	111756126	rs1009532	10	111840725	A	G	0.828898	-0.0249471	0.00787258	0.0015304	0.553198	0.0620668	4.969274e-19	-0.0450962	0.0151037	0.00282869	0.0467699	20	cis	No
ENSG00000165476	10	REEP3	65281123	rs72823538	10	65397678	A	G	0.970822	-0.0222704	0.0219505	0.31031	0.806217	0.159477	4.295594e-07	-0.0276233	0.0277694	0.319863	0.875204	12	cis	No
ENSG00000155252	10	PI4K2A	99344131	rs45607432	10	99382407	C	T	0.788982	-0.000374091	0.00843636	0.964631	-0.515915	0.111767	3.912653e-06	0.000725102	0.016353	0.964633	0.959121	7	cis	No
ENSG00000155254	10	MARVELD1	99472930	rs7914697	10	99481018	T	C	0.711134	0.00631794	0.00696364	0.364261	0.712398	0.0533651	1.192379e-40	0.00886855	0.00979748	0.365366	0.280973	20	cis	No
ENSG00000196233	10	LCOR	98592017	rs57807455	10	98558501	T	A	0.893908	-0.00208054	0.0108576	0.84804	-0.619922	0.0785392	2.94646e-15	0.00335613	0.0175196	0.848084	0.918929	20	cis	No
ENSG00000213390	10	ARHGAP19	98978996	rs144195244	10	99056834	T	C	0.937675	-0.00307985	0.0155866	0.843361	-0.645298	0.116279	2.86353e-08	0.00477276	0.0241694	0.843459	0.7597	18	cis	No
ENSG00000171314	10	PGAM1	99185917	rs77309868	10	99195200	C	T	0.933824	-0.0135653	0.0127905	0.288883	-1.1445	0.135349	2.768749e-17	0.0118526	0.0112632	0.292648	0.152838	20	cis	No
ENSG00000217094	10	ENSG00000217094	32477251	rs7904258	10	32444069	A	G	0.721289	-0.00406873	0.00692834	0.557029	-0.241415	0.064966	0.000202384	0.0168537	0.029055	0.561874	NA	NA	cis	No
ENSG00000108219	10	TSPAN14	82213922	rs4303181	10	82283255	C	T	0.769384	-0.0176048	0.0171865	0.305676	0.362377	0.0731656	7.31403e-07	-0.0485815	0.0484308	0.315808	0.746481	5	cis	No
ENSG00000188199	10	NUTM2B	81462983	rs10885307	10	81577614	G	T	0.372199	-9.14415e-05	0.00823269	0.991138	0.714104	0.0478528	2.337523e-50	-0.000128051	0.0115287	0.991138	0.490922	20	cis	No
ENSG00000225484	10	NUTM2B-AS1	81563813	rs2983829	10	81510746	T	A	0.816877	-0.0127445	0.01005	0.204759	-1.03559	0.0586723	1.0105e-69	0.0123065	0.00972963	0.205925	0.629753	20	cis	No
ENSG00000226659	10	LOC101929574	82289353	rs11185932	10	82295398	G	A	0.671802	-0.00725493	0.00683458	0.288461	-0.688591	0.0536744	1.127687e-37	0.0105359	0.00995937	0.290106	0.203479	20	cis	No
ENSG00000244733	10	ENSG00000244733	81420647	rs10885307	10	81577614	G	T	0.372199	-9.14415e-05	0.00823269	0.991138	0.845794	0.0538527	1.382469e-55	-0.000108113	0.00973368	0.991138	0.586966	20	cis	No
ENSG00000224934	10	ENSG00000224934	101190948	rs7099391	10	101195830	C	T	0.399977	-0.00517562	0.00651734	0.427119	-0.380599	0.0532586	8.918021e-13	0.0135986	0.0172293	0.429953	0.0127226	20	cis	No
ENSG00000165449	10	SLC16A9	61410523	rs61863109	10	61491998	G	A	0.701914	0.0133678	0.00741181	0.0712965	0.868374	0.0568993	1.378457e-52	0.0153941	0.00859467	0.0732745	0.811226	20	cis	No
ENSG00000108242	10	CYP2C18	96443251	rs7085563	10	96488997	T	A	0.845822	-0.0039644	0.00808475	0.623883	-0.466019	0.0723906	1.214048e-10	0.00850695	0.0173988	0.624885	0.243514	20	cis	No
ENSG00000047056	10	WDR37	1095478	rs4880470	10	1077480	G	A	0.301587	-0.00487167	0.00743882	0.512533	-0.311732	0.0709295	1.107951e-05	0.0156278	0.0241263	0.517149	0.0225374	8	cis	No
ENSG00000148814	10	LRRC27	134145614	rs7098749	10	134157220	G	A	0.892274	-0.00461307	0.00891017	0.604646	0.903657	0.0879018	8.645355e-25	-0.00510489	0.00987262	0.605103	0.559463	20	cis	No
ENSG00000152457	10	DCLRE1C	14939358	rs7922341	10	14952792	A	C	0.849323	-0.00655775	0.00807088	0.416493	0.500114	0.0849157	3.872896e-09	-0.0131125	0.0162909	0.42088	0.481619	4	cis	No
ENSG00000187522	10	HSPA14	14880163	rs79252177	10	14843711	C	G	0.950163	-0.0123608	0.0115049	0.282647	-0.545837	0.12797	1.995999e-05	0.0226456	0.0217359	0.297481	0.495662	3	cis	No
ENSG00000242600	10	MBL1P	81664654	rs7072441	10	81684075	T	G	0.759804	-0.00365352	0.00846021	0.665852	0.526159	0.0754148	3.018451e-12	-0.00694376	0.01611	0.666452	0.857821	20	cis	No
ENSG00000272447	10	LOC642361	81585658	rs3740277	10	81443834	G	A	0.896709	0.0198334	0.0117819	0.0923009	0.731045	0.0827479	1.004568e-18	0.0271302	0.0164065	0.0982033	0.127408	20	cis	No
ENSG00000272489	10	ENSG00000272489	81422948	rs2753674	10	81415802	G	A	0.653011	-0.00514724	0.00790124	0.514758	-0.369592	0.0660832	2.233958e-08	0.0139268	0.0215228	0.517585	0.732668	20	cis	No
ENSG00000198964	10	SGMS1	52065360	rs113171113	10	52242876	A	G	0.755252	0.000791243	0.00775074	0.918688	-0.389357	0.0853759	5.103124e-06	-0.00203218	0.0199115	0.918709	0.230368	13	cis	No
ENSG00000204152	10	TIMM23B	51371390	rs12246377	10	51779087	T	C	0.639006	-0.0320555	0.00924105	0.00052276	-0.478512	0.0565862	2.758959e-17	0.06699	0.0208737	0.00133059	0.185566	20	cis	No
ENSG00000226200	10	ENSG00000226200	52384711	rs7903649	10	52360372	A	G	0.332049	-0.00283678	0.00677549	0.675448	-0.519921	0.0741409	2.339233e-12	0.00545618	0.013055	0.675992	0.217086	15	cis	No
ENSG00000121898	10	CPXM2	125465723	rs3862127	10	125651901	C	A	0.624883	-0.00617594	0.00784195	0.430959	-0.572431	0.0923472	5.693693e-10	0.010789	0.0138095	0.434643	0.419915	10	cis	No
ENSG00000182022	10	CHST15	125767184	rs6588748	10	125836265	G	A	0.353408	-0.00645157	0.0102721	0.529959	0.652493	0.0931928	2.531625e-12	-0.00988757	0.0158061	0.531607	0.99654	20	cis	No
ENSG00000072401	10	UBE2D1	60094735	rs76455223	10	60193608	T	A	0.817927	-0.0020347	0.00873246	0.815758	-0.481182	0.116193	3.45446e-05	0.00422855	0.0181766	0.816044	0.146102	8	cis	No
ENSG00000165626	10	BEND7	13480484	rs10796082	10	13504471	A	G	0.468254	0.00459384	0.00664684	0.489483	0.245015	0.0582007	2.555621e-05	0.0187492	0.0274914	0.495238	0.381856	6	cis	No
ENSG00000108094	10	CUL2	35297479	rs61842496	10	34651852	C	T	0.928688	0.00903045	0.0126905	0.476718	-0.531596	0.136398	9.723728e-05	-0.0169874	0.0242671	0.483915	NA	NA	cis	No
ENSG00000108100	10	CCNY	35535953	rs58751517	10	35857541	C	G	0.679272	0.0153294	0.00679134	0.0239953	-0.646757	0.0895282	5.045707e-13	-0.0237019	0.0110012	0.0312027	0.277283	20	cis	No
ENSG00000107951	10	MTPAP	30598730	rs7922941	10	30641811	G	A	0.454599	0.00334143	0.00684752	0.625567	0.775169	0.0811294	1.239163e-21	0.00431058	0.0088451	0.626016	0.239034	16	cis	No
ENSG00000259994	10	ENSG00000259994	30591755	rs2689214	10	30632228	G	A	0.679272	0.00122951	0.00706412	0.861826	-0.417107	0.0560122	9.568804e-14	-0.00294771	0.0169406	0.861864	0.607727	15	cis	No
ENSG00000172987	10	HPSE2	100218875	rs142842835	10	100450176	T	C	0.643141	0.00638469	0.0116117	0.582423	-0.306339	0.059876	3.117109e-07	-0.0208419	0.038123	0.584584	0.467674	11	cis	No
ENSG00000095637	10	SORBS1	97071528	rs1536441	10	97295831	G	A	0.127684	0.00310572	0.0109895	0.777478	0.474212	0.111127	1.97856e-05	0.00654922	0.023225	0.777951	NA	NA	cis	No
ENSG00000225830	10	ERCC6	50663414	rs1949884	10	50771419	A	G	0.696429	-0.0116899	0.0071294	0.101073	-0.528953	0.0943301	2.053076e-08	0.0221001	0.0140427	0.11554	0.471734	20	cis	No
ENSG00000178429	10	RPS3AP5	86320199	rs7087458	10	85616686	G	T	0.44923	0.00418507	0.0066374	0.528349	0.33692	0.0885829	0.000142698	0.0124216	0.0199691	0.533916	0.388355	4	cis	No
ENSG00000077147	10	TM9SF3	98277866	rs12220047	10	98326780	A	G	0.828081	-0.0100075	0.00874614	0.252533	-0.401459	0.0899512	8.07917e-06	0.0249278	0.0224905	0.267701	NA	NA	cis	No
ENSG00000166167	10	BTRC	103113820	rs11191042	10	103307959	C	G	0.814776	0.0010844	0.00772433	0.888354	0.527339	0.0622061	2.305165e-17	0.00205636	0.0146498	0.888369	0.465601	20	cis	No
ENSG00000166169	10	POLL	103338639	rs11191211	10	103853055	A	G	0.932306	0.0156663	0.0121123	0.195866	0.767398	0.179584	1.926922e-05	0.0204148	0.0164908	0.215733	0.971439	7	cis	No
ENSG00000269609	10	C10orf95-AS1	104209574	rs150098322	10	104214364	T	C	0.880369	-0.0275097	0.0115426	0.0171574	-0.838902	0.102816	3.371674e-16	0.0327925	0.0143341	0.0221539	0.322548	20	cis	No
ENSG00000107438	10	PDLIM1	96997329	rs34119978	10	96976998	G	A	0.884104	0.0183313	0.0117132	0.11758	-0.521631	0.0933158	2.271327e-08	-0.0351423	0.0233184	0.131795	0.651408	20	cis	No
ENSG00000138115	10	CYP2C8	96796530	rs7910217	10	96999873	G	A	0.695825	0.00972932	0.00745396	0.191806	-0.680155	0.0563635	1.572331e-33	-0.0143046	0.0110231	0.194395	0.356751	20	cis	No
ENSG00000173145	10	NOC3L	96075004	rs12780491	10	96121022	A	G	0.764823	-0.0197955	0.00789042	0.0121142	0.647728	0.0651963	2.930327e-23	-0.0305614	0.0125641	0.0149972	0.0447375	20	cis	No
ENSG00000182771	10	GRID1	87359312	rs7070807	10	88126912	C	T	0.84057	-0.0029329	0.00801375	0.714378	0.739069	0.0584286	1.131716e-36	-0.00396837	0.0108476	0.714492	0.244595	20	cis	No
ENSG00000171160	10	MORN4	99374310	rs10882972	10	99395023	G	C	0.790383	-0.00113422	0.00844128	0.893113	-0.881448	0.0644976	1.612214e-42	0.00128677	0.00957707	0.893118	0.986549	20	cis	No
ENSG00000204176	10	SYT15	46955444	rs139409903	10	46092325	C	T	0.972923	-0.011755	0.0255187	0.645055	1.03981	0.27389	0.00014678	-0.011305	0.0247217	0.647463	NA	NA	cis	No
ENSG00000187134	10	AKR1C1	4934796	rs35767584	10	5041296	C	A	0.886905	-0.0193301	0.0110112	0.0791741	1.13424	0.0788322	6.152287e-47	-0.0170423	0.00977999	0.0814084	0.242011	20	cis	No
ENSG00000235316	10	ENSG00000235316	75491582	rs78500771	10	75706159	A	T	0.966036	0.0135988	0.0261126	0.602524	-0.662509	0.193521	0.000618329	-0.0205262	0.0398681	0.606656	NA	NA	cis	No
ENSG00000242338	10	ENSG00000242338	75475601	rs7923045	10	75487498	A	T	0.409781	0.00375884	0.00708507	0.595745	0.484147	0.0664194	3.117099e-13	0.00776384	0.0146728	0.596715	0.0989155	20	cis	No
ENSG00000272140	10	ENSG00000272140	75463493	rs1134777	10	75538651	C	G	0.729925	0.0125241	0.00727872	0.0853148	-0.293902	0.0659032	8.211338e-06	-0.0426132	0.0265453	0.108427	0.0143859	6	cis	No
ENSG00000165997	10	ARL5B	18948334	rs12774593	10	18820815	G	A	0.836485	-0.00425408	0.00811515	0.600129	-0.82592	0.108467	2.647803e-14	0.00515072	0.00984885	0.60099	0.111645	20	cis	No
ENSG00000107771	10	CCSER2	86088342	rs10887272	10	86058516	T	C	0.223273	0.0157873	0.00791752	0.0461555	-0.991371	0.0993486	1.889013e-23	-0.0159247	0.00814432	0.0505458	0.572414	20	cis	No
ENSG00000165996	10	HACD1	17631958	rs7072141	10	17571394	G	A	0.405462	0.0173993	0.00665449	0.00893132	0.241484	0.0582475	3.385951e-05	0.0720516	0.0325793	0.026996	NA	NA	cis	No
ENSG00000057608	10	GDI2	5807186	rs72772390	10	5849917	C	G	0.782913	-0.00948875	0.00789092	0.229174	-0.815998	0.0650948	4.771236e-36	0.0116284	0.00971466	0.231309	0.621953	20	cis	No
ENSG00000188373	10	C10orf99	85933494	rs76395746	10	85930322	C	A	0.855626	-0.00246318	0.00928303	0.790746	-0.500205	0.135055	0.000212458	0.00492434	0.018606	0.791268	NA	NA	cis	No
ENSG00000224596	10	ZMIZ1-AS1	80703085	rs779230	10	80804050	C	T	0.488329	-0.00424092	0.00676794	0.530909	-0.422146	0.0525234	9.184057e-16	0.0100461	0.0160809	0.532153	0.288619	20	cis	No
ENSG00000107581	10	EIF3A	120794356	rs55666795	10	120064995	G	A	0.965336	-0.0105982	0.0225354	0.638148	0.938055	0.221708	2.326092e-05	-0.0112981	0.0241715	0.640205	NA	NA	cis	No
ENSG00000234724	10	ENSG00000234724	95897505	rs17109372	10	95525331	C	A	0.799953	-0.0117352	0.00787329	0.13609	0.504034	0.119476	2.457001e-05	-0.0232826	0.0165668	0.159911	0.0678667	5	cis	No
ENSG00000165841	10	CYP2C19	96447911	rs77346846	10	96138064	G	A	0.969071	-0.0218446	0.0191906	0.254996	0.631198	0.141008	7.593314e-06	-0.0346082	0.0313711	0.269946	0.199827	15	cis	No
ENSG00000107984	10	DKK1	54074056	rs1194510	10	54012974	A	G	0.112278	-0.0138511	0.00867178	0.110206	-0.366028	0.0796462	4.313507e-06	0.0378416	0.0250817	0.131367	0.467289	16	cis	No
ENSG00000204740	10	MALRD1	19492779	rs10740927	10	19890336	T	G	0.455882	0.0187379	0.00641203	0.00347449	-0.324083	0.0557003	5.94368e-09	-0.0578182	0.0221405	0.00901657	0.425472	20	cis	No
ENSG00000095485	10	CWF19L1	101992055	rs3904036	10	101998414	T	C	0.555906	0.0123232	0.00717571	0.0859158	1.03824	0.0413661	5.127644e-139	0.0118693	0.00692758	0.0866494	0.40708	20	cis	No
ENSG00000107554	10	DNMBP	101635334	rs7085955	10	101690637	C	G	0.608193	0.00456376	0.00679948	0.502099	0.242489	0.0584982	3.394581e-05	0.0188205	0.0284056	0.50761	0.516271	5	cis	No
ENSG00000227695	10	DNMBP-AS1	101686767	rs7085955	10	101690637	C	G	0.608193	0.00456376	0.00679948	0.502099	-0.35962	0.057033	2.873206e-10	-0.0126905	0.0190142	0.504503	0.132705	20	cis	No
ENSG00000196693	10	ZNF33B	43084555	rs7898080	10	43197926	T	C	0.919935	-0.00879346	0.0125053	0.481943	-0.863296	0.097443	8.03757e-19	0.0101859	0.0145311	0.483319	0.414269	20	cis	No
ENSG00000226051	10	ZNF503-AS1	77029577	rs1259518	10	77021574	C	T	0.345588	0.00114461	0.0075337	0.87924	-0.855333	0.0479417	3.388923e-71	-0.0013382	0.00880823	0.879245	0.254083	20	cis	No
ENSG00000229097	10	ENSG00000229097	71923441	rs4747037	10	72247164	C	T	0.970472	-0.00876659	0.0114539	0.444043	1.04453	0.262128	6.75349e-05	-0.00839286	0.011166	0.452267	0.0103794	4	cis	No
ENSG00000156515	10	HK1	71029740	rs67711332	10	71109317	G	A	0.947246	-0.0110853	0.0160539	0.489879	-0.559472	0.101536	3.586349e-08	0.0198139	0.0289192	0.493252	0.388467	4	cis	No
ENSG00000175470	10	PPP2R2D	133747955	rs4342945	10	133751657	T	C	0.499416	0.00630912	0.0065724	0.337085	0.752638	0.0613778	1.442142e-34	0.00838268	0.0087592	0.33856	0.351251	20	cis	No
ENSG00000120008	10	WDR11	122610687	rs7080550	10	122633607	C	G	0.639589	-0.00510998	0.00661282	0.439678	-0.827619	0.04956	1.325677e-62	0.00617431	0.00799872	0.440166	0.663102	20	cis	No
ENSG00000230555	10	ENSG00000230555	43916186	rs4948737	10	44014339	T	C	0.932656	-0.0120575	0.0101579	0.235224	0.797751	0.0958633	8.666788e-17	-0.0151144	0.0128621	0.23995	0.934535	20	cis	No
ENSG00000185009	10	AP3M1	75881524	rs12360119	10	76015316	G	C	0.4169	0.00269565	0.00682442	0.692843	-0.600342	0.0519773	7.376008e-31	-0.00449019	0.0113742	0.693013	0.666117	20	cis	No
ENSG00000165630	10	PRPF18	13628927	rs873847	10	14509978	T	A	0.482843	-0.00430245	0.00649868	0.507939	-0.275832	0.0684166	5.538635e-05	0.0155981	0.0238758	0.513563	0.476209	7	cis	No
ENSG00000183605	10	SFXN4	120900279	rs10749291	10	120920588	T	C	0.51739	-0.00647146	0.00648915	0.318632	1.05872	0.0361557	1.745625e-188	-0.00611253	0.00613279	0.318912	0.605308	20	cis	No
ENSG00000122952	10	ZWINT	58116989	rs72800977	10	58160163	C	T	0.955532	-0.0285347	0.020103	0.155775	-1.17486	0.159923	2.035756e-13	0.0242877	0.0174274	0.163423	0.712713	6	cis	No
ENSG00000099284	10	MACROH2A2	71812552	rs72804530	10	72792429	C	T	0.954365	0.0159308	0.0189727	0.401096	-0.861848	0.228739	0.000164678	-0.0184845	0.022554	0.412464	NA	NA	cis	No
ENSG00000187164	10	SHTN1	118643742	rs10510025	10	118650996	C	T	0.748016	-0.0161787	0.00712679	0.0232004	0.336444	0.0637926	1.334639e-07	-0.0480874	0.0230617	0.0370544	0.00540769	18	cis	No
ENSG00000205740	10	LOC107984285	1017097	rs12777788	10	1034228	G	A	0.790966	-0.000101497	0.00924949	0.991245	-0.624553	0.103385	1.531029e-09	0.000162511	0.0148098	0.991245	0.0235738	20	cis	No
ENSG00000107929	10	LARP4B	855484	rs12249634	10	872744	G	A	0.794001	-0.0160284	0.009455	0.0900313	0.425722	0.113031	0.000165604	-0.0376499	0.0243553	0.122137	0.526884	8	cis	No
ENSG00000108010	10	GLRX3	131934663	rs10741210	10	131984312	G	A	0.610177	0.0101354	0.00674546	0.132953	-0.322839	0.0573022	1.761093e-08	-0.0313946	0.0216245	0.146555	0.954219	17	cis	No
ENSG00000138347	10	MYPN	69865912	rs1971067	10	69420461	C	T	0.958567	0.00303361	0.0189087	0.872539	0.832066	0.199089	2.923282e-05	0.00364588	0.0227417	0.872632	0.34295	8	cis	No
ENSG00000180817	10	PPA1	71962586	rs10762345	10	71939374	A	G	0.640756	-0.0112885	0.0076883	0.142032	0.659492	0.0685238	6.315104e-22	-0.017117	0.0117928	0.146647	0.0842941	20	cis	No
ENSG00000156521	10	TYSND1	71897737	rs6480442	10	71900246	C	T	0.631303	-0.0169282	0.00764585	0.0268265	0.490567	0.0712647	5.830622e-12	-0.0345074	0.0163721	0.0350568	0.669381	20	cis	No
ENSG00000166224	10	SGPL1	72575717	rs80012015	10	72591607	C	T	0.943161	0.015514	0.0150349	0.302136	0.926959	0.104046	5.144189e-19	0.0167364	0.016328	0.305357	0.587978	20	cis	No
ENSG00000107957	10	SH3PXD2A	105348285	rs11591710	10	105687632	A	C	0.866597	0.0255078	0.0107315	0.0174589	-0.403982	0.079606	3.879717e-07	-0.0631409	0.0293337	0.0313579	0.109146	20	cis	No
ENSG00000214562	10	NUTM2D	89117425	rs3128177	10	89144038	C	A	0.347572	0.00651971	0.00857422	0.447025	-0.478598	0.0712471	1.849453e-11	-0.0136225	0.0180297	0.449913	0.899258	13	cis	No
ENSG00000107819	10	SFXN3	102790991	rs59193147	10	102792230	G	T	0.969421	-0.0182505	0.023167	0.430826	0.767673	0.147877	2.08837e-07	-0.0237738	0.0305237	0.43606	0.663515	6	cis	No
ENSG00000151240	10	DIP2C	320130	rs2387307	10	1259455	T	C	0.622666	-0.000862374	0.00657598	0.895665	0.264247	0.0754707	0.000462959	-0.00326351	0.0249032	0.895737	0.900655	3	cis	No
ENSG00000178440	10	TIMM23B-AGAP6	51732523	rs1916561	10	50881316	T	A	0.331349	0.00873165	0.00689367	0.205292	0.356533	0.0765932	3.241542e-06	0.0244904	0.0200383	0.221639	0.0742977	20	cis	No
ENSG00000128805	10	ARHGAP22	49654077	rs7914253	10	49807631	C	A	0.313959	0.000567211	0.00694094	0.93487	-0.420555	0.0580658	4.397379e-13	-0.00134872	0.0165053	0.934874	0.795507	20	cis	No
ENSG00000107968	10	MAP3K8	30722866	rs72809002	10	30254086	G	A	0.984594	0.0400923	0.0397719	0.313428	-0.991739	0.274378	0.00030093	-0.0404263	0.0416336	0.331548	NA	NA	cis	No
ENSG00000138172	10	CALHM2	105206543	rs11191688	10	105192570	A	G	0.63387	0.00951479	0.00662341	0.150849	0.43225	0.0598122	4.945781e-13	0.0220122	0.0156229	0.158843	0.0107926	20	cis	No
ENSG00000166275	10	BORCS7	104613980	rs4919690	10	104616500	T	C	0.756419	-0.0261656	0.00757576	0.000552644	-0.958799	0.0552994	2.417306e-67	0.02729	0.00805655	0.000705831	0.00395282	20	cis	No
ENSG00000150093	10	ITGB1	33189247	rs2383976	10	33169499	C	G	0.242764	-0.00652407	0.00721695	0.366	-0.370841	0.0636659	5.718284e-09	0.0175926	0.019694	0.371697	0.30657	20	cis	No
ENSG00000148690	10	FRA10AC1	95427640	rs7909452	10	95467509	T	C	0.409547	0.00414224	0.00651408	0.524848	-0.739963	0.0487951	6.058477e-52	-0.0055979	0.00881099	0.525212	0.929161	20	cis	No
ENSG00000223482	10	NUTM2A-AS1	88963632	rs143469550	10	88920172	C	T	0.960201	-0.0178698	0.0221009	0.418772	1.02405	0.186903	4.276153e-08	-0.0174501	0.0218156	0.423773	0.971234	6	cis	No
ENSG00000165731	10	RET	43572475	rs2472738	10	43597088	T	C	0.586368	0.000701207	0.00651085	0.914235	0.445811	0.0548523	4.383304e-16	0.00157288	0.0146058	0.914243	0.27979	20	cis	No
ENSG00000169826	10	CSGALNACT2	43633934	rs2505557	10	43666016	C	T	0.170168	-0.00661244	0.0077478	0.393404	-0.964526	0.0601055	5.979758e-58	0.00685564	0.00804411	0.394072	0.299086	20	cis	No
ENSG00000198915	10	RASGEF1A	43689983	rs12262152	10	43678123	C	T	0.816176	-0.0237577	0.00865256	0.00603745	0.639243	0.066308	5.392165e-22	-0.0371654	0.0140739	0.00827289	0.112922	20	cis	No
ENSG00000228065	10	ENSG00000228065	67330096	rs80074217	10	67330226	A	G	0.971522	-0.00423522	0.0210646	0.840652	1.60255	0.150633	1.966784e-26	-0.0026428	0.0131468	0.840681	0.0850338	20	cis	No
ENSG00000224914	10	LINC00863	89102493	rs7095182	10	88968166	C	T	0.716153	0.00366408	0.00836728	0.661455	-0.448698	0.0716989	3.897191e-10	-0.00816603	0.0186935	0.662229	0.96503	15	cis	No
ENSG00000138303	10	ASCC1	73856278	rs17712800	10	74025656	G	C	0.96557	0.00450913	0.0173681	0.795157	0.968087	0.150052	1.10607e-10	0.00465777	0.0179552	0.795318	0.137194	20	cis	No
ENSG00000239883	10	ENSG00000239883	46349541	rs10900228	10	46082128	A	G	0.837885	0.0280694	0.0100154	0.00506888	0.42981	0.079437	6.27787e-08	0.0653065	0.0262424	0.012825	0.0156632	20	cis	No
ENSG00000134463	10	ECHDC3	11784365	rs55681579	10	11834962	G	A	0.90159	0.00610657	0.0123031	0.61965	0.909663	0.0874287	2.361779e-25	0.006713	0.0135403	0.62005	0.757786	8	cis	No
ENSG00000119977	10	TCTN3	97423158	rs10748645	10	97560382	T	C	0.443744	-0.0118285	0.00650018	0.0688019	0.466207	0.054947	2.163395e-17	-0.0253718	0.0142598	0.0751975	0.0999332	20	cis	No
ENSG00000138185	10	ENTPD1	97471536	rs7083411	10	97606602	C	T	0.443861	-0.011961	0.00649917	0.0657107	0.515217	0.0531729	3.342926e-22	-0.0232155	0.01284	0.0705966	0.0792556	20	cis	No
ENSG00000151657	10	KIN	7792925	rs10905229	10	7821595	T	A	0.639006	0.00196691	0.00677528	0.771581	0.393977	0.055618	1.40439e-12	0.00499245	0.0172116	0.771768	0.259144	20	cis	No
ENSG00000188690	10	UROS	127477146	rs10751532	10	127474707	C	T	0.533497	0.00269244	0.00649323	0.678396	-0.704877	0.0611986	1.07239e-30	-0.00381973	0.00921783	0.678592	0.0689283	20	cis	No
ENSG00000107651	10	SEC23IP	121652223	rs12241478	10	121667020	T	C	0.735061	-0.0102258	0.00732045	0.162449	-0.496113	0.0626854	2.48575e-15	0.0206118	0.0149837	0.16894	0.879385	20	cis	No
ENSG00000165672	10	PRDX3	120927215	rs7080535	10	120940518	G	C	0.427288	-0.00786792	0.00657722	0.231604	-0.341988	0.0558012	8.861054e-10	0.0230064	0.0195952	0.240362	0.0111914	17	cis	No
ENSG00000138279	10	ANXA7	75134859	rs11000727	10	75402631	A	G	0.880486	-0.0169269	0.0102413	0.0983699	-0.423203	0.118516	0.000355831	0.0399971	0.0266661	0.133633	NA	NA	cis	No
ENSG00000107833	10	NPM3	103541082	rs2305191	10	103560333	C	T	0.594771	-0.00260383	0.00681771	0.702519	0.307353	0.0743961	3.607123e-05	-0.00847179	0.0222766	0.703723	0.895439	4	cis	No
ENSG00000107796	10	ACTA2	90694831	rs79318294	10	89809345	G	A	0.980392	0.0362319	0.0271446	0.18195	1.2393	0.31034	6.51447e-05	0.0292358	0.0230943	0.205538	NA	NA	cis	No
ENSG00000079332	10	SAR1A	71907045	rs9971030	10	71916826	C	T	0.599673	-0.0206038	0.0075049	0.00604406	0.551689	0.0540109	1.709408e-24	-0.0373468	0.0140863	0.00801862	0.279384	20	cis	No
ENSG00000119965	10	C10orf88	124690419	rs9423289	10	124704695	C	T	0.426471	-0.0165794	0.0064559	0.010226	-0.341709	0.0558747	9.617835e-10	0.0485191	0.0204911	0.0178939	0.559577	16	cis	No
ENSG00000196177	10	ACADSB	124768495	rs9423250	10	124788587	T	G	0.383987	-0.00568378	0.006697	0.396046	0.488489	0.0547122	4.324757e-19	-0.0116354	0.0137714	0.398168	0.542699	20	cis	No
ENSG00000203780	10	FANK1	127585108	rs45535336	10	127730991	A	G	0.702783	-0.00378987	0.00755338	0.615847	-0.523185	0.108238	1.34035e-06	0.00724384	0.0145149	0.617735	0.654665	8	cis	No
ENSG00000148450	10	MSRB2	23384435	rs117122529	10	23345196	T	C	0.972456	0.0407204	0.0229965	0.0766063	1.00012	0.246093	4.823989e-05	0.0407155	0.0250816	0.10452	NA	NA	cis	No
ENSG00000233968	10	LOC101928834	19999257	rs4748591	10	19781211	T	C	0.930906	-0.024898	0.0120796	0.0392882	-0.41001	0.127839	0.00134019	0.0607253	0.0350212	0.0829253	NA	NA	cis	No
ENSG00000180745	10	CLRN3	129676105	rs72845049	10	129681917	A	C	0.865896	-0.00421702	0.012099	0.727432	-0.397746	0.109333	0.000274828	0.0106023	0.0305582	0.728626	NA	NA	cis	No
ENSG00000107521	10	HPS1	100175955	rs3750604	10	100175581	G	A	0.766223	0.013666	0.00734334	0.0627433	0.40798	0.0638028	1.611864e-10	0.0334967	0.0187461	0.0739589	0.379765	20	cis	No
ENSG00000119919	10	NKX2-3	101292690	rs7917773	10	100452418	C	T	0.644258	-0.00137449	0.00669274	0.837283	0.390038	0.0967726	5.566789e-05	-0.00352399	0.0171815	0.837491	0.666036	6	cis	No
ENSG00000165816	10	VWA2	115999018	rs9663775	10	116004234	C	T	0.837885	0.0121755	0.00993516	0.220389	0.909628	0.0688821	8.146844e-40	0.0133851	0.0109692	0.222369	0.234782	20	cis	No
ENSG00000059573	10	ALDH18A1	97365696	rs749049	10	97376096	A	T	0.5007	0.00368839	0.00660203	0.576384	0.447144	0.0905255	7.835307e-07	0.00824877	0.014859	0.578802	0.285519	18	cis	No
ENSG00000120594	10	PLXDC2	20105168	rs914289	10	20125278	G	C	0.446779	-0.00458683	0.00663312	0.489249	0.56431	0.0938192	1.800366e-09	-0.00812821	0.0118318	0.492096	0.875719	20	cis	No
ENSG00000107798	10	LIPA	90973326	rs1412445	10	91002804	C	T	0.655929	0.00199153	0.00693492	0.773979	0.61524	0.0540314	4.870084e-30	0.003237	0.0112755	0.774049	0.159046	15	cis	No
ENSG00000122378	10	PRXL2A	82167585	rs12413452	10	82144723	C	T	0.883698	-0.000361917	0.0190461	0.984839	-0.725653	0.0859098	2.996952e-17	0.000498747	0.0262469	0.984839	0.715162	20	cis	No
ENSG00000127884	10	ECHS1	135175984	rs2995327	10	135098845	C	T	0.190126	0.0124304	0.00961846	0.196237	-0.523878	0.122799	1.988682e-05	-0.0237277	0.0191841	0.216145	0.0410844	15	cis	No
ENSG00000119917	10	IFIT3	91087651	rs3979139	10	90567045	A	T	0.681839	-0.0112111	0.00689896	0.104154	-0.274016	0.0793977	0.000558134	0.040914	0.0278287	0.141505	NA	NA	cis	No
ENSG00000152779	10	SLC16A12	91190051	rs78194372	10	91275450	C	A	0.959967	-0.0168949	0.0183988	0.358482	0.860506	0.164375	1.649559e-07	-0.0196337	0.0217078	0.365756	0.814122	4	cis	No
ENSG00000198682	10	PAPSS2	89419370	rs679195	10	89813271	G	A	0.410247	-0.00591072	0.00700834	0.399014	-0.359788	0.0954865	0.000164595	0.0164283	0.0199611	0.410497	0.240554	7	cis	No
ENSG00000119943	10	PYROXD2	100143322	rs2274244	10	100175218	A	G	0.740313	0.0125244	0.00705519	0.0758638	1.1332	0.0388742	8.23954e-187	0.0110522	0.00623743	0.0764076	0.0481891	20	cis	No
ENSG00000237135	10	DDX10P1	31207941	rs2220816	10	31175608	T	C	0.831583	0.0172944	0.00917783	0.0595149	0.64113	0.0746691	8.982682e-18	0.0269749	0.0146558	0.0656855	0.150617	20	cis	No
ENSG00000177283	10	FZD8	35927177	rs10827561	10	36176901	C	T	0.787465	-0.0184283	0.00816746	0.0240516	-0.482487	0.0649387	1.086891e-13	0.0381944	0.0176912	0.0308539	0.70523	5	cis	No
ENSG00000148908	10	RGS10	121259340	rs3808954	10	121297851	C	T	0.0923203	-0.0191187	0.0104925	0.0684362	0.417852	0.0890544	2.704137e-06	-0.0457547	0.0269375	0.0894043	0.184292	9	cis	No
ENSG00000177640	10	CASC2	119805790	rs7897130	10	119823094	A	T	0.983894	0.017005	0.0283014	0.547938	-0.809998	0.142149	1.210529e-08	-0.0209939	0.0351338	0.550146	0.692917	8	cis	No
ENSG00000138316	10	ADAMTS14	72432559	rs10999500	10	72500863	C	G	0.410598	-0.00796796	0.00699963	0.254978	-0.342984	0.0716062	1.668959e-06	0.0232313	0.0209764	0.26808	0.939769	12	cis	No
ENSG00000048740	10	CELF2	11047259	rs1291867	10	11083239	A	G	0.902194	-0.0165847	0.0125299	0.18563	0.533684	0.112921	2.287868e-06	-0.0310759	0.0243815	0.202462	0.626405	13	cis	No
ENSG00000179988	10	PSTK	124713897	rs9423295	10	124733664	T	C	0.311158	-0.0126931	0.00680595	0.0621813	0.290402	0.05789	5.263525e-07	-0.0437087	0.0250036	0.0804468	0.409799	6	cis	No
ENSG00000148843	10	PDCD11	105156405	rs11191688	10	105192570	A	G	0.63387	0.00951479	0.00662341	0.150849	0.780918	0.080964	5.148476e-22	0.0121841	0.00857512	0.155356	0.0400622	20	cis	No
ENSG00000119969	10	HELLS	96305547	rs912466	10	96271840	C	A	0.593604	0.0129488	0.00654478	0.0478731	0.330463	0.0566407	5.399233e-09	0.0391838	0.0209126	0.060973	0.0735324	15	cis	No
ENSG00000148842	10	CNNM2	104678050	rs55833108	10	104741583	G	T	0.781746	0.00314109	0.0084479	0.710027	-0.98987	0.0871246	6.498994e-30	-0.00317323	0.00853892	0.710176	0.0550679	20	cis	No
ENSG00000173915	10	ATP5MK	105148798	rs1712517	10	105033015	C	T	0.529412	-0.00854953	0.0063931	0.181123	-0.308057	0.0558839	3.538848e-08	0.0277531	0.0213549	0.193735	0.0108374	20	cis	No
ENSG00000214435	10	AS3MT	104629273	rs11191421	10	104623053	C	G	0.760154	-0.0213158	0.00798493	0.00759637	-0.978589	0.0661363	1.541861e-49	0.0217822	0.00829137	0.00861183	0.00446615	20	cis	No
ENSG00000107938	10	EDRF1	127408084	rs147039956	10	127061876	G	A	0.937908	-0.0256579	0.0183194	0.161339	0.637451	0.163127	9.317821e-05	-0.0402508	0.0305287	0.18735	NA	NA	cis	No
ENSG00000107614	10	TRDMT1	17184253	rs17466418	10	17244307	G	T	0.681723	-0.000977983	0.00711515	0.890675	-0.48532	0.0597018	4.326104e-16	0.00201513	0.0146628	0.89069	0.338234	16	cis	No
ENSG00000151923	10	TIAL1	121334199	rs11199245	10	122013947	G	A	0.80719	0.0120709	0.00754463	0.109615	-0.490653	0.118447	3.436877e-05	-0.0246017	0.0164838	0.135573	0.435312	4	cis	No
ENSG00000138111	10	MFSD13A	104221149	rs1977382	10	104249839	A	T	0.751984	-0.0211435	0.00772374	0.00619144	-0.704488	0.0607034	3.867777e-31	0.0300126	0.0112645	0.00771368	0.289879	20	cis	No
ENSG00000138175	10	ARL3	104433488	rs12764388	10	104413385	G	A	0.894024	-0.00340933	0.0104068	0.743209	0.720786	0.0879144	2.429432e-16	-0.00473002	0.0144496	0.743407	0.330854	20	cis	No
ENSG00000148584	10	A1CF	52559169	rs17500846	10	52642384	A	G	0.715336	0.0402215	0.00744312	6.52249e-08	0.724702	0.0963234	5.327558e-14	0.0555007	0.0126453	1.138478e-05	0.111232	14	cis	No
ENSG00000260589	10	STAM-DT	17683283	rs2243617	10	17685727	A	G	0.862745	0.00247487	0.00877225	0.777848	0.383171	0.0762497	5.028757e-07	0.00645892	0.0229299	0.778188	0.839071	10	cis	No
ENSG00000107643	10	MAPK8	49514698	rs3827681	10	49659637	T	C	0.440009	0.000295516	0.00657946	0.964175	0.444694	0.0562015	2.522909e-15	0.000664538	0.0147957	0.964176	0.754884	20	cis	No
ENSG00000204172	10	AGAP9	47191844	rs72792220	10	49389758	C	T	0.782306	0.00126884	0.00792597	0.872813	-0.941143	0.0663093	1.008929e-45	-0.00134819	0.00842218	0.872821	0.430875	7	cis	No
ENSG00000226964	10	ENSG00000226964	47396223	rs146132271	10	49262733	A	G	0.151093	-0.00803245	0.0167397	0.631339	0.560965	0.0800199	2.377723e-12	-0.014319	0.0299107	0.632135	0.752994	6	cis	No
ENSG00000155229	10	MMS19	99218081	rs912482	10	98407991	C	T	0.700514	0.0120216	0.00699748	0.0857986	0.257201	0.0786193	0.00106989	0.0467401	0.0307295	0.128256	0.477384	3	cis	No
ENSG00000108175	10	ZMIZ1	80828792	rs942795	10	80965186	C	A	0.926471	0.0359409	0.015834	0.0232166	0.626275	0.17265	0.000286257	0.0573884	0.0298247	0.0543311	0.225885	4	cis	No
ENSG00000213341	10	CHUK	101948055	rs148211064	10	102066889	C	T	0.988212	0.0405338	0.0335525	0.22702	1.47833	0.394169	0.000176487	0.0274186	0.0238446	0.250189	NA	NA	cis	No
ENSG00000150054	10	MPP7	28339922	rs7099335	10	28665159	A	G	0.670285	-0.000257881	0.00752169	0.97265	-0.485599	0.0555796	2.393779e-18	0.000531058	0.0154896	0.97265	0.918741	17	cis	No
ENSG00000273008	10	ENSG00000273008	43632272	rs17153156	10	43704637	C	G	0.762138	0.00598912	0.00723883	0.408033	0.313715	0.0771452	4.771417e-05	0.019091	0.0235473	0.417509	0.371686	3	cis	No
ENSG00000232934	10	ENSG00000232934	114165977	rs2900946	10	114191550	T	C	0.716036	0.0080844	0.00709583	0.254571	0.458625	0.0590278	7.870662e-15	0.0176275	0.0156374	0.259632	0.883859	17	cis	No
ENSG00000243316	10	GUCY2GP	114067939	rs4918744	10	114146502	T	G	0.730742	0.00883407	0.00706553	0.211188	0.336898	0.0746207	6.337485e-06	0.0262218	0.0217617	0.228221	0.78376	12	cis	No
ENSG00000272631	10	ENSG00000272631	88509511	rs58334200	10	88512918	C	T	0.819211	-0.018883	0.00784085	0.0160276	-0.879587	0.105362	6.927246e-17	0.021468	0.00927775	0.0206717	0.240213	20	cis	No
ENSG00000042286	10	AIFM2	71857979	rs79934058	10	71995414	C	G	0.955766	0.00694293	0.0158526	0.661409	0.788531	0.149194	1.255128e-07	0.00880489	0.0201729	0.662494	0.117134	10	cis	No
ENSG00000236552	10	RPL13AP5	98510045	rs7099517	10	97958775	A	G	0.976307	-0.0400578	0.0228924	0.0801477	0.815784	0.20037	4.673192e-05	-0.0491034	0.0305438	0.107914	0.723871	3	cis	No
ENSG00000180525	10	ENSG00000180525	695888	rs118099662	10	330701	A	G	0.984477	0.0379622	0.0304958	0.213194	-1.55195	0.317324	1.004571e-06	-0.024461	0.0202765	0.227675	0.992927	7	cis	No
ENSG00000107560	10	RAB11FIP2	119764427	rs112225392	10	119975188	C	G	0.873599	-0.00135278	0.0116355	0.907444	0.596694	0.141251	2.396359e-05	-0.00226713	0.0195073	0.907479	0.657358	3	cis	No
ENSG00000119979	10	DENND10	120863598	rs4259754	10	120835384	C	G	0.425447	0.0108766	0.0097009	0.262206	0.797635	0.0804644	3.658903e-23	0.0136361	0.0122396	0.26524	0.284902	20	cis	No
ENSG00000065154	10	OAT	126085872	rs61863821	10	126071040	C	T	0.947596	-0.020374	0.0133667	0.12745	0.626715	0.140487	8.157583e-06	-0.0325092	0.0225388	0.1492	0.0647643	5	cis	No
ENSG00000096746	10	HNRNPH3	70090931	rs79487962	10	70876774	T	C	0.9595	-0.0160526	0.0191898	0.402864	-0.820595	0.222043	0.000219322	0.0195621	0.0239768	0.41457	0.659709	5	cis	No
ENSG00000272983	10	ENSG00000272983	38426265	rs7086341	10	38410865	G	A	0.935924	0.00850197	0.0133547	0.524368	-0.954565	0.105821	1.870567e-19	-0.00890664	0.0140252	0.525397	0.00706022	13	cis	No
ENSG00000067082	10	KLF6	3818188	rs7072577	10	4031002	A	G	0.491597	-0.00591238	0.00659964	0.370326	0.22989	0.0568402	5.243528e-05	-0.0257183	0.0294036	0.381757	NA	NA	cis	No
ENSG00000119950	10	MXI1	111967363	rs118105004	10	112114412	C	G	0.949813	-0.00379077	0.016145	0.814367	-0.615822	0.11953	2.576718e-07	0.00615563	0.0262442	0.814557	0.840636	10	cis	No
ENSG00000165609	10	NUDT5	12207324	rs766947	10	12860828	G	A	0.702614	-0.00284547	0.0077591	0.713823	-0.280101	0.0627327	8.007286e-06	0.0101587	0.0277944	0.714741	NA	NA	cis	No
ENSG00000225192	10	ENSG00000225192	38083204	rs139930332	10	38893178	G	A	0.970472	0.0611999	0.0279512	0.0285588	0.974629	0.23268	2.805471e-05	0.062793	0.0323605	0.0523288	0.370007	8	cis	No
ENSG00000151465	10	CDC123	12237964	rs11257025	10	11275763	G	A	0.89553	0.00105222	0.0120443	0.930383	0.451568	0.127689	0.000405501	0.00233015	0.0266803	0.930405	NA	NA	cis	No
ENSG00000148541	10	FAM13C	61005890	rs184487880	10	61025397	C	A	0.972689	0.00708971	0.0267434	0.790931	-1.05265	0.31007	0.000686591	-0.00673511	0.0254831	0.791551	0.627553	3	cis	No
ENSG00000185267	10	CDNF	14861249	rs35976531	10	15667122	C	G	0.669351	-0.00273397	0.00694466	0.693818	-0.226615	0.061514	0.000229639	0.0120644	0.0308197	0.695464	NA	NA	cis	No
ENSG00000165995	10	CACNB2	18429606	rs12774593	10	18820815	G	A	0.836485	-0.00425408	0.00811515	0.600129	0.342734	0.0733652	2.988375e-06	-0.0124122	0.0238263	0.602405	0.288822	7	cis	No
ENSG00000240291	10	ENSG00000240291	18802044	rs7922829	10	18817374	T	C	0.638072	0.00347106	0.0066722	0.602905	0.719924	0.0518503	7.846253e-44	0.00482143	0.00927443	0.603159	0.289753	20	cis	No
ENSG00000060339	10	CCAR1	70480769	rs117430450	10	70241249	G	A	0.976307	-0.0416568	0.0293436	0.155718	1.15059	0.281181	4.276946e-05	-0.0362047	0.0269943	0.179855	0.473439	13	cis	No
ENSG00000151208	10	DLG5	79550549	rs2289308	10	79579251	G	A	0.658497	-0.00922794	0.00692841	0.182893	0.973691	0.0627581	2.747017e-54	-0.00947728	0.00714179	0.184503	0.000711637	20	cis	No
ENSG00000229124	10	VIM-AS1	17256238	rs12251583	10	17283993	T	G	0.95775	-0.0266308	0.0122155	0.0292507	0.586008	0.139817	2.774189e-05	-0.0454444	0.0234966	0.0531025	0.888535	4	cis	No
ENSG00000107854	10	TNKS2	93558069	rs7913999	10	93613894	G	T	0.690593	-0.0111678	0.0097637	0.252705	-0.556036	0.057726	5.839257e-22	0.0200847	0.0176828	0.256028	0.119333	20	cis	No
ENSG00000228701	10	TNKS2-AS1	93542596	rs2487513	10	93598728	A	G	0.419935	-0.000163116	0.00717946	0.981874	-0.81392	0.045739	7.741626e-71	0.000200408	0.00882085	0.981874	0.32513	20	cis	No
ENSG00000170759	10	KIF5B	32297938	rs3006650	10	32420282	A	G	0.64099	-0.00930053	0.00664024	0.161324	-0.250003	0.0589974	2.259969e-05	0.0372017	0.0279739	0.183561	0.230393	5	cis	No
[truncated: 15,228 more rows]

## Sheet: Supplementary_Material_3_eQTL
probeID	Gene	minimum_pval_variant_cis	minimum_pval_cis_pval	minimum_pval_cis_beta	minimum_pval_variant_trans	minimum_pval_trans_pval	minimum_pval_trans_beta
ENSG00000001630	CYP51A1	7:91353669_T/G	0.00101962	-0.818392	11:110878634_G/GT	8.66e-09	-1.43661
ENSG00000002587	HS3ST1	4:11144078_T/G	9.3e-05	-1.06921	11:111057512_G/A	8.53e-05	0.945133
ENSG00000003400	CASP10	2:200250520_C/T	9.03e-05	1.21605	11:111263832_C/T	4.1e-05	1.11989
ENSG00000003756	RBM5	3:50132039_C/CT	0.000451307	1.00144	11:111110194_C/T	0.000124554	0.356966
ENSG00000004059	ARF5	7:127766572_A/G	3.56e-05	0.23542	11:111237186_C/A	3.55e-05	-0.522682
ENSG00000004799	PDK4	7:96103614_A/AT	1.67e-05	-0.779571	11:111057512_G/A	0.000452715	-0.871226
ENSG00000005020	SKAP2	7:26643711_C/T	7.05e-05	0.369533	11:111327494_G/T	4.19e-05	0.342391
ENSG00000006210	CX3CL1	16:57617236_A/AT	0.000261044	-0.446119	11:111431036_A/C	6.18e-05	-0.346523
ENSG00000006453	BAIAP2L1	7:99039064_G/A	0.000409587	-1.52757	11:111340898_G/A	0.000147836	1.18004
ENSG00000006712	PAF1	19:38513060_G/A	0.000383902	1.53454	11:111520037_G/C	7.9e-05	-0.373403
ENSG00000007174	DNAH9	17:11063745_G/C	0.000226286	-0.462718	11:111251302_C/T	6.83e-06	1.04072
ENSG00000007202	KIAA0100	17:28416338_C/CT	7.52e-05	-1.12524	11:111197737_G/T	0.00106688	-0.364844
ENSG00000007264	MATK	19:3812468_C/G	1.86e-09	0.57498	11:111286502_T/TAAAAC	3.04e-14	0.454441
ENSG00000008323	PLEKHG6	12:6332182_C/G	4.36e-06	-0.327887	11:111213269_A/G	5.74e-07	-1.11714
ENSG00000009844	VTA1	6:142809581_C/CTGTTTGTTTGTT	0.000798028	0.595985	11:111488888_G/A	0.000341522	0.47289
ENSG00000010270	STARD3NL	7:37708335_ACG/A	0.000267104	1.13525	11:111227781_G/T	0.000328539	0.261321
ENSG00000010318	PHF7	3:51582587_C/CT	0.00120388	-0.725941	11:111073692_G/A	0.000618087	0.568331
ENSG00000010319	SEMA3G	3:52659350_G/C	0.000309192	0.485408	11:111420962_G/A	0.000213562	-0.476648
ENSG00000010810	FYN	6:111046386_CTG/C	0.000413593	0.563025	11:111611086_A/ATGTG	0.000292755	0.773706
ENSG00000011405	PIK3C2A	11:17965148_T/C	0.000259187	1.13188	11:111401725_G/A	0.000308448	0.557948
ENSG00000011465	DCN	12:91284644_C/CA	0.000334309	-0.311189	11:110871169_TA/T	6.17e-05	1.09495
ENSG00000013441	CLK1	2:201534040_TTATC/T	0.00153616	-0.236472	11:111501706_T/C	0.000863315	-1.0873
ENSG00000014641	MDH1	2:62722137_T/G	1.25e-05	1.58074	11:111349931_T/C	2.7e-06	-1.58183
ENSG00000014914	MTMR11	1:149756370_T/C	0.000129389	0.81158	11:111312761_A/G	0.000529817	-0.662004
ENSG00000015153	YAF2	12:42115949_T/A	0.000626595	-0.35871	11:111611086_A/ATG	0.000151661	-0.326169
ENSG00000015171	ZMYND11	10:976033_CAACGTGTGGACCCGGCCTAGTAGAATGTAAGCCTGTCGCGT/C	0.000155433	-0.684732	11:111313450_TA/T	0.000139631	-0.359835
ENSG00000019549	SNAI2	8:48217049_GT/G	8.95e-05	-0.786213	11:111296501_AT/A	6.59e-05	0.933597
ENSG00000021645	NRXN3	14:77192105_A/G	0.000225032	-1.59071	11:111391270_A/G	2.13e-05	0.493203
ENSG00000025434	NR1H3	11:47939635_G/T	1.81e-06	-1.40208	11:111760199_C/T	8.12e-06	-0.864836
ENSG00000025796	SEC63	6:108568215_C/CT	0.000247722	0.645658	11:111438447_C/T	0.00032902	0.45396
ENSG00000025800	KPNA6	1:32226567_ATT/A	9.34e-05	1.11099	11:111404257_T/C	1.81e-05	-0.259126
ENSG00000026025	VIM	10:17260935_C/CT	2.48e-06	1.15587	11:111210866_C/T	0.000169158	0.516875
ENSG00000029363	BCLAF1	6:135698114_G/A	0.000838628	-0.886506	11:111374618_T/G	1.96e-05	0.267377
ENSG00000030066	NUP160	11:47647327_AT/A	0.000104687	-0.751684	11:111364595_G/T	0.000708282	0.3645
ENSG00000034510	TMSB10	2:85732329_CT/C	0.000219699	0.51337	11:110963128_C/G	0.000224651	-0.438516
ENSG00000035681	NSMAF	8:58599775_G/A	0.00112998	0.457411	11:110824442_T/*,C	3.69e-05	1.49956
ENSG00000035720	STAP1	4:67205872_G/GCACA	0.000362905	1.1113	11:111778816_C/CT	6.56e-05	0.609113
ENSG00000039987	BEST2	19:12418391_C/CA	0.000325818	-0.723579	11:111125089_G/A	0.00021357	1.20126
ENSG00000040608	RTN4R	22:19551998_G/GA	0.000214498	0.63059	11:111219754_T/C	2.55e-05	-0.618983
ENSG00000049192	ADAMTS6	5:64700731_C/G	0.000223081	-0.890073	11:111250082_C/G	2.15e-05	0.456227
ENSG00000051341	POLQ	3:122453514_T/G	0.000334771	0.318243	11:110957627_C/T	5.63e-05	-0.444836
ENSG00000054116	TRAPPC3	1:35337756_T/G	0.000738552	-0.923241	11:110946467_G/A	0.000544825	0.59152
ENSG00000054267	ARID4B	1:234958241_A/G	8.44e-05	0.538102	11:111410341_G/A	1.89e-05	-0.67973
ENSG00000054654	SYNE2	14:63200854_G/T	0.000247276	1.25897	11:111577493_G/GCTC	0.000268337	-1.43891
ENSG00000054965	FAM168A	11:73464865_A/AT	0.00103778	-0.455068	11:111325894_G/A	0.000481032	-0.277689
ENSG00000057252	SOAT1	1:179164086_T/A	1.49e-05	0.241023	11:110935625_A/C	1.26e-05	0.349907
ENSG00000058335	RASGRF1	15:78151579_AT/A	0.000436261	0.695897	11:110955222_C/T	0.000241955	0.691733
ENSG00000058673	ZC3H11A	1:204567731_AT/A	5.81e-05	0.777835	11:111385086_AT/A	0.000211469	-0.548592
ENSG00000059378	PARP12	7:140238031_G/A	0.000828388	-0.882752	11:111271323_CA/C	0.000148301	-0.680846
ENSG00000059758	CDK17	12:95683204_T/C	8.71e-05	-0.308225	11:111454326_T/C	4.74e-05	-1.00584
ENSG00000061656	SPAG4	20:35444250_C/T	0.000509741	0.720046	11:111171433_A/G	0.0001909	-0.656891
ENSG00000062716	VMP1	17:59599130_T/A	0.000123948	-0.473164	11:110946913_C/T	0.000525774	0.521025
ENSG00000062822	POLD1	19:50778916_TA/T	0.000235924	-0.585459	11:110860177_C/T	0.000228453	-0.422141
ENSG00000063169	BICRA	19:47297770_A/G	8.92e-05	-0.645219	11:111361326_G/A	9.14e-07	0.889348
ENSG00000063322	MED29	19:39397750_G/C	0.000377921	-0.389084	11:111706153_CAATT/C	1.83e-05	-1.31888
ENSG00000064692	SNCAIP	5:122612493_A/G	0.000167353	0.393016	11:111338198_T/C	3.61e-05	-0.376254
ENSG00000065183	WDR3	1:117042896_CTAAA/C	0.000253866	-1.08217	11:111196933_G/C	0.000429008	-0.360165
ENSG00000065328	MCM10	10:13664704_A/AT	0.000101318	-1.34654	11:111309445_T/C	0.000203902	-0.251512
ENSG00000065361	ERBB3	12:56575898_G/A	9.2e-05	-0.770807	11:111625174_C/G	0.00010916	-1.32459
ENSG00000065526	SPEN	1:16937366_C/CA	9.49e-05	0.607703	11:111170833_G/T	3.37e-05	-0.660077
ENSG00000065548	ZC3H15	2:186473551_G/A	0.000180585	0.360118	11:111079598_A/ATTTT	0.000106851	-0.426747
ENSG00000065833	ME1	6:83841948_A/G	0.000193383	1.22096	11:110906144_G/A	5.86e-05	-0.700058
ENSG00000066583	ISOC1	5:129766655_AACAAACAAACAAAC/A	3.09e-05	-0.389097	11:111022477_ACT/A	3.98e-08	-1.27671
ENSG00000067113	PLPP1	5:55566100_G/A	0.0002227	0.391232	11:111055826_C/A	8.49e-06	0.298938
ENSG00000067182	TNFRSF1A	12:6333835_G/A	8.74e-06	-1.37299	11:111619961_A/T	0.000244136	1.03899
ENSG00000067191	CACNB1	17:39087769_G/A	5.66e-05	1.05469	11:110910947_G/GT	7.69e-06	0.430782
ENSG00000067225	PKM	15:71452803_C/T	0.00243598	0.405494	11:111745047_ATTT/A	0.000734356	1.10962
ENSG00000067606	PRKCZ	1:2174491_G/A	0.000129123	1.25266	11:111262296_T/G	0.000962403	-0.839598
ENSG00000068001	HYAL2	3:50476929_C/CT	0.00177049	0.681899	11:111136059_C/G	0.00096335	1.43204
ENSG00000068028	RASSF1	3:51100972_A/AT	0.000625014	-0.6657	11:111255691_C/T	0.000104111	-1.19388
ENSG00000068831	RASGRP2	11:65534132_G/A	0.000717911	-0.775973	11:111372377_T/G	0.000171997	-0.300945
ENSG00000068885	IFT80	3:161044346_G/GTATTTATTTATT	0.000861133	-0.94791	11:110898187_T/TGTGC	5.25e-05	1.3985
ENSG00000068971	PPP2R5B	11:65806610_G/A	0.000382101	-0.407358	11:110852828_G/A	0.000200646	0.625693
ENSG00000069424	KCNAB2	1:6436076_G/A	0.000404204	0.906771	11:111265020_A/G	0.000124451	0.377498
ENSG00000070193	FGF10	5:45106020_C/CT	0.000656502	1.18565	11:111614476_A/T	3.04e-06	1.48802
ENSG00000070748	CHAT	10:49651583_T/G	2.1e-05	0.247523	11:111301511_ATGTGCAATG/A	6.49e-22	0.558237
ENSG00000070756	PABPC1	8:101553623_CTT/C	2.14e-05	0.966358	11:111213269_A/G	0.000376778	-0.816177
ENSG00000070985	TRPM5	11:2577634_G/A	0.000161606	0.658906	11:111301511_ATGTGCAATG/A	4.44e-29	0.638636
ENSG00000071282	LMCD1	3:8732599_G/A	0.000132199	-0.276719	11:111197887_G/A	2.66e-06	0.418547
ENSG00000071564	TCF3	19:2053995_C/G	9.44e-05	-0.427858	11:111404525_T/C	5.22e-05	-0.430522
ENSG00000073111	MCM2	3:128195111_G/A	0.000447346	0.682638	11:111439670_C/A	6.4e-07	0.583342
ENSG00000073756	PTGS2	1:186217386_C/G	0.000461495	1.21766	11:111207001_A/G	0.000111606	-0.363099
ENSG00000074657	ZNF532	18:59036515_T/G	0.000182983	-0.385877	11:111361534_C/T	0.000159433	-0.275871
ENSG00000075426	FOSL2	2:29146756_G/A	0.000314127	-0.559799	11:111194137_T/G	0.000164504	0.328899
ENSG00000075568	TMEM131	2:98959016_G/A	4.16e-05	1.04294	11:111405000_C/T	1.37e-05	0.41836
ENSG00000078246	TULP3	12:2214455_G/A	0.000329409	-0.415451	11:111523518_T/C	0.000134204	1.50346
ENSG00000078401	EDN1	6:12511511_T/TA	0.000525426	0.27618	11:111109591_CCTGT/C	0.000132342	-0.69564
ENSG00000078403	MLLT10	10:20641578_G/C	0.000303389	0.99118	11:110918641_C/T	3.54e-05	-0.298478
ENSG00000078687	TNRC6C	17:78930880_C/CAA	3.5e-05	-0.77425	11:111067547_T/C	1.99e-05	1.37056
ENSG00000078808	SDF4	1:1333082_G/A	0.000413689	-1.10091	11:111290306_C/T	0.000482142	-0.686935
ENSG00000079435	LIPE	19:43386496_C/T	0.000525934	1.20589	11:111052037_A/G	0.000192225	-0.639448
ENSG00000080839	RBL1	20:37982105_G/A	0.000231674	-0.456108	11:111559005_C/T	6.1e-05	-0.887317
ENSG00000080947	CROCCP3	1:16526309_C/T	8.98e-05	-1.02399	11:111331728_C/G	3.6e-05	-0.229789
ENSG00000081041	CXCL2	4:74949835_CT/C	0.000116043	-0.611977	11:111358240_T/C	0.000176873	0.290344
ENSG00000081189	MEF2C	5:89002675_GA/G	0.000105368	-0.844578	11:111316987_T/G	8.05e-06	-0.306355
ENSG00000081386	ZNF510	9:96066607_A/G	5.31e-05	0.236661	11:111728806_T/C	4.36e-05	-0.498159
ENSG00000081692	JMJD4	1:227006949_TCAA/T	0.000680418	-0.238983	11:111727528_A/AC	5.41e-05	1.23854
ENSG00000081721	DUSP12	1:161758243_TCTA/T	0.000151309	-0.883507	11:111501706_T/C	0.000136882	-1.23509
ENSG00000082068	WDR70	5:38594791_A/G	6.1e-05	-1.71925	11:110801504_A/G	0.000270947	0.894183
ENSG00000082515	MRPL22	5:155065437_T/TTC	0.000505297	-0.512649	11:111283058_C/CT	6.34e-05	0.311062
ENSG00000082516	GEMIN5	5:154413074_G/A	7.84e-05	-1.07823	11:111133484_T/C	5.11e-05	0.407226
ENSG00000083642	PDS5B	13:32388666_C/CT	0.00051291	-0.256511	11:111420812_C/A	0.000774181	0.381971
ENSG00000083817	ZNF416	19:57933720_CA/C	0.000359394	-1.17059	11:111593421_C/T	0.000159554	-0.764734
ENSG00000084090	STARD7	2:95387127_A/T	0.00012313	-1.65152	11:110834321_G/A	7.49e-05	-0.370701
ENSG00000084623	EIF3I	1:31988249_G/GATC	0.000143962	0.942416	11:111051978_G/T	2.51e-05	-0.647841
ENSG00000085117	CD82	11:43612344_C/A	0.000164847	-0.883459	11:111170833_G/T	1.98e-05	0.99149
ENSG00000085433	WDR47	1:108962158_G/A	0.000142229	1.00539	11:111163020_A/G	0.00011747	0.750621
ENSG00000085511	MAP3K4	6:160977991_A/G	8.66e-05	-0.392823	11:111642852_C/G	5.86e-05	-1.14131
ENSG00000087087	SRRT	7:100580666_CACAG/C	0.000175577	-1.61606	11:110922887_C/T	4.45e-05	1.48501
ENSG00000087095	NLK	17:27997952_G/C	0.000168141	0.313494	11:111430099_T/G	1.44e-05	-0.283274
ENSG00000088320	REM1	20:31277067_GTT/G	0.000164319	-0.90491	11:111316987_T/G	0.000919901	-0.312958
ENSG00000088356	PDRG1	20:32301085_C/CTT	0.00121508	-0.798426	11:111312087_G/C	2.13e-05	-0.312136
ENSG00000088682	COQ9	16:57512024_TC/T	4.73e-05	-1.328	11:111724442_G/C	9.52e-05	0.35164
ENSG00000089356	FXYD3	19:35289818_C/CATAAATAA	0.000202001	-0.951066	11:110798125_G/A	0.000577484	-1.12142
ENSG00000090013	BLVRB	19:39878484_CTG/C	0.000394921	-0.656396	11:111271330_A/T	0.000117539	0.979997
ENSG00000090061	CCNK	14:100331674_C/T	8.78e-05	1.43055	11:111249075_C/A	8.38e-05	0.444055
ENSG00000090097	PCBP4	3:51536838_C/CT	0.000348722	-0.863248	11:111750843_GT/G	0.000150255	0.913124
ENSG00000090924	PLEKHG2	19:40343795_AT/A	0.000273264	-0.517001	11:110965323_T/C	9.38e-05	-0.672541
ENSG00000091409	ITGA6	2:172002209_C/CA	0.000118041	-1.24611	11:111411329_T/C	9.78e-05	-0.290213
ENSG00000091651	ORC6	16:47455389_TA/T	0.000133704	1.00927	11:111043488_GAC/G	0.000204821	-1.20449
ENSG00000091986	CCDC80	3:113602079_A/T	0.00116825	0.469192	11:110798125_G/A	3.65e-06	-1.47717
ENSG00000092208	GEMIN2	14:39367827_GT/G	3.18e-05	0.284747	11:111369208_C/T	3.81e-05	-0.391029
ENSG00000092330	TINF2	14:23952166_C/T	0.000401771	1.23002	11:111501706_T/C	0.000252102	-1.18836
ENSG00000092470	WDR76	15:44582719_T/TA	7.61e-05	1.29295	11:111210866_C/T	5.65e-05	0.375242
ENSG00000092841	MYL6	12:55679830_C/T	1.12e-06	2.05425	11:111218698_T/C	5.87e-05	0.77306
ENSG00000095303	PTGS1	9:122373856_CTT/C	2.01e-05	0.62269	11:111300019_C/T	1.18e-07	0.316346
ENSG00000095319	NUP188	9:128239567_C/CGT	7.32e-05	-0.493019	11:111060375_TA/T	0.000965375	0.287873
ENSG00000096060	FKBP5	6:34681845_AT/A	3.79e-06	-0.546747	11:110806102_C/T	0.000339038	-0.880738
ENSG00000099246	RAB18	10:27015138_A/G	0.000297901	-0.692486	11:111071342_T/C	0.000139088	1.18456
ENSG00000099381	SETD1A	16:31882565_C/A	0.000190406	1.29453	11:111065087_A/G	0.000337992	0.354165
ENSG00000099795	NDUFB7	19:15088664_GTAGATAGA/G	3.2e-05	0.449486	11:111073692_G/A	0.000609565	0.568924
ENSG00000099866	MADCAM1	19:1174603_C/T	0.000466072	-0.654906	11:111392169_CTTTTTTTTTTTTTT/C	5e-05	0.697172
ENSG00000099953	MMP11	22:23756956_C/T	0.000198879	-0.211631	11:110848462_C/T	4.63e-05	-1.26316
ENSG00000099992	TBC1D10A	22:31020297_TA/T	4.7e-06	0.56437	11:111671782_A/G	3.08e-06	0.466963
ENSG00000099995	SF3A1	22:30162701_CT/C	0.000219754	-0.351915	11:111171433_A/G	4.21e-05	-0.718449
ENSG00000100060	MFNG	22:37595998_C/CA	0.000487982	0.995687	11:111513698_T/G	0.000329661	0.687739
ENSG00000100206	DMC1	22:38226010_GCT/G	0.000492511	0.679218	11:110967969_T/C	5.14e-05	-0.281419
ENSG00000100307	CBX7	22:39510605_C/T	0.000508256	-0.890043	11:111753688_A/G	7.23e-06	0.738401
ENSG00000100311	PDGFB	22:38951088_G/A	0.000334366	-0.495095	11:111055215_A/G	1.46e-05	0.793276
ENSG00000100319	ZMAT5	22:30130643_G/T	0.000408231	0.361626	11:111377915_A/G	2.34e-05	0.423992
ENSG00000100335	MIEF1	22:38680868_A/G	0.000583371	-0.748117	11:111163020_A/G	0.000553951	-0.834533
ENSG00000100354	TNRC6B	22:40626866_A/AACACAC	4.13e-05	-0.538473	11:111348690_A/G	0.000130297	-0.341318
ENSG00000100368	CSF2RB	22:37097814_A/*,G	0.000312457	1.55646	11:111651743_CATTT/C	0.000305479	0.27837
ENSG00000100410	PHF5A	22:40638694_T/TCA	9.79e-05	-1.34929	11:111327613_C/T	1.31e-05	-1.27993
ENSG00000100442	FKBP3	14:46070536_G/A	0.000956475	-1.21686	11:111218698_T/C	0.000150775	0.730846
ENSG00000100578	KIAA0586	14:58072640_T/C	0.000291313	-1.02688	11:111716226_G/A	4.39e-05	0.376933
ENSG00000100592	DAAM1	14:59111180_C/T	0.00111657	0.618169	11:111317572_T/TTGTG	0.000288631	-0.331509
ENSG00000100664	EIF5	14:104194842_G/A	3.41e-05	1.0733	11:111427372_C/T	0.000297156	0.299524
ENSG00000100722	ZC3H14	14:87625707_ATG/A	0.000686995	0.595047	11:111467128_A/G	0.000339326	-1.15484
ENSG00000100802	C14orf93	14:23037901_G/A	3.36e-05	-0.404158	11:110985384_G/T	1.44e-06	0.469693
ENSG00000100865	CINP	14:101474702_G/A	2.73e-05	0.427351	11:110813739_G/C	8.75e-07	-0.554498
ENSG00000100902	PSMA6	14:34953371_ATTT/A	4.64e-05	1.32943	11:110906533_G/A	6.19e-05	0.366637
ENSG00000100918	REC8	14:24120258_C/CA	5.85e-05	-1.19046	11:111070453_A/G	0.000234683	0.681092
ENSG00000101082	SLA2	20:37526295_C/G	0.000690466	-0.374461	11:111435762_C/G	3.52e-05	0.365044
ENSG00000101126	ADNP	20:50526726_C/T	0.00010376	0.708774	11:111180627_A/T	3.44e-05	1.41131
ENSG00000101152	DNAJC5	20:63936846_CA/C	0.000332062	-0.439971	11:111599394_C/CA	8.87e-05	-0.559465
ENSG00000101266	CSNK2A1	20:1027852_C/G	0.000102035	-0.276321	11:111250626_T/A	7.88e-05	-0.972168
ENSG00000101294	HM13	20:32270402_TA/T	4.48e-05	0.887019	11:110813739_G/C	0.000178969	-0.431896
ENSG00000101335	MYL9	20:36605789_C/T	1.02e-05	-0.446649	11:111119889_G/A	8.11e-06	1.17094
ENSG00000101336	HCK	20:31920229_G/GCA	0.000709973	-0.30407	11:111301511_ATGTGCAATG/A	1.29e-10	0.391072
ENSG00000101346	POFUT1	20:32890880_G/T	0.000197414	0.640028	11:111362232_C/T	0.000303568	0.57842
ENSG00000101445	PPP1R16B	20:38438692_AAAGGAAGG/A	1.61e-05	-0.459676	11:111674749_A/AT	0.000147782	-0.70124
ENSG00000101665	SMAD7	18:48311246_C/G	0.000262174	0.591842	11:111313450_TA/T	4.67e-05	0.301604
ENSG00000102189	EEA1	12:92922959_AAAAAT/A	0.000257696	-0.290899	11:111245911_T/C	1.66e-06	0.467225
ENSG00000102683	SGCG	13:23158979_G/A	1.35e-06	0.380425	11:111409961_G/A	2.06e-07	-0.590696
ENSG00000102738	MRPS31	13:41035846_AC/A	7.31e-05	-0.854056	11:111506163_A/T	1.03e-05	0.307912
ENSG00000102755	FLT1	13:28872652_A/G	3.12e-05	1.78104	11:111458126_C/G	2.55e-06	0.302809
ENSG00000102786	INTS6	13:51299811_TA/T	3.26e-06	0.569336	11:111427997_T/C	0.000170384	-0.29399
ENSG00000102878	HSF4	16:66871262_C/CA	0.000154348	0.88716	11:111443996_C/T	0.000156456	0.409288
ENSG00000102921	N4BP1	16:48869485_CT/C	0.000650869	-0.797908	11:111558787_T/A,*	7.36e-05	-1.03954
ENSG00000102974	CTCF	16:67906073_AT/A	0.000195836	1.21996	11:111355351_G/A	0.00017477	0.735631
ENSG00000103024	NME3	16:1402828_C/CA	2.51e-05	0.859236	11:111181665_A/T	1.84e-05	-0.291634
ENSG00000103061	SLC7A6OS	16:68951332_A/G	4.16e-05	-1.27045	11:111231559_C/T	0.00105554	1.0698
ENSG00000103089	FA2H	16:74387091_G/A	2.07e-05	-0.456853	11:111404151_A/G	7.67e-05	-0.376608
ENSG00000103257	SLC7A5	16:88488922_G/A	5.5e-05	1.14541	11:111271330_A/T	7.91e-05	-0.697487
ENSG00000103449	SALL1	16:51191548_C/G	0.000917454	0.568291	11:111283932_C/T	0.000108111	-0.309464
ENSG00000103460	TOX3	16:52515759_G/A	0.000681605	0.491708	11:111477970_C/T	0.000476947	0.885849
ENSG00000103507	BCKDK	16:31101489_A/C	0.000351086	-0.334689	11:110948162_G/A	4.61e-05	0.801725
ENSG00000103528	SYT17	16:19169016_C/T	4.61e-07	-1.44965	11:111652829_A/G	0.000218257	0.751275
ENSG00000103591	AAGAB	15:68025483_T/TAC	0.00111192	-0.89752	11:111020897_A/G	2.99e-05	0.851441
ENSG00000103710	RASL12	15:65053307_T/C	3.21e-05	0.790026	11:111222666_G/C	0.000227157	0.385025
ENSG00000103978	TMEM87A	15:42791316_C/T	0.000357183	0.366132	11:110859680_C/G	0.000263267	0.434418
ENSG00000103994	ZNF106	15:43224502_T/TA	0.000589539	-1.19551	11:110865528_T/C	0.00035035	-1.24211
ENSG00000104142	VPS18	15:40635288_G/C	5.05e-05	-1.40154	11:111443799_G/C	0.000448835	0.324205
ENSG00000104205	SGK3	8:66048713_A/C	0.000459951	-0.419627	11:111783896_CTATAT/C	0.000130371	0.386738
ENSG00000104375	STK3	8:98349924_G/A	0.000231928	-0.35069	11:111140238_A/G	6.21e-05	0.396759
ENSG00000104691	UBXN8	8:31470395_TAC/T	9.93e-05	-0.888504	11:110910075_C/A	7.39e-07	-0.695282
ENSG00000104859	CLASRP	19:45472070_GA/G	0.000215588	1.15168	11:111358352_T/TCTCA	0.000599855	-0.653033
ENSG00000105127	AKAP8	19:15567206_C/T	0.000157951	0.405367	11:111569351_C/CA	5.63e-05	-0.675626
ENSG00000105171	POP4	19:29338888_A/G	0.000788213	-1.45506	11:111245754_G/A	0.000135466	-0.41298
ENSG00000105290	APLP1	19:35905897_G/C	0.00012222	0.830933	11:110836934_G/C	9.27e-05	0.344598
ENSG00000105323	HNRNPUL1	19:40787128_C/T	0.000153996	0.958432	11:110799237_T/C	0.000127982	-0.949341
ENSG00000105366	SIGLEC8	19:50738514_A/G	3.57e-05	-1.34835	11:111470564_C/T	8.49e-05	0.365705
ENSG00000105388	CEACAM5	19:42388002_A/C	0.000243353	0.958264	11:111074331_G/A	0.000193905	-0.457023
ENSG00000105427	CNFN	19:42469965_CT/C	0.000507057	-0.62588	11:111100838_A/C	0.000285697	-0.684162
ENSG00000105429	MEGF8	19:43354426_G/A	0.000483496	0.326987	11:111645636_C/T	2.81e-05	-0.672819
ENSG00000105438	KDELR1	19:48044090_C/T	0.000122584	0.50602	11:111442473_C/T	7.75e-05	0.238517
ENSG00000105662	CRTC1	19:18068750_CT/C	3.04e-05	-0.36822	11:111673192_T/A	3.41e-05	0.428329
ENSG00000105698	USF2	19:35274138_G/A	7.79e-05	-0.274282	11:111461988_G/C	4.43e-05	0.577467
ENSG00000105821	DNAJC2	7:103952554_TTC/T	3.09e-06	-0.727285	11:111437281_T/C	2.08e-05	0.245593
ENSG00000105851	PIK3CG	7:106846640_C/T	1.15e-05	0.263767	11:111301511_ATGTGCAATG/A	1.06e-09	0.370879
ENSG00000106290	TAF6	7:99627431_C/T	0.000617322	0.442035	11:111509254_C/G	0.000355958	1.10415
ENSG00000106328	FSCN3	7:128470539_G/C	3.13e-05	1.43802	11:111729796_G/A	0.00016086	-1.17376
ENSG00000106331	PAX4	7:128214495_A/G	0.000182764	-0.448987	11:111269214_A/AC	1.4e-05	-0.427343
ENSG00000106346	USP42	7:5290052_A/ATTTT	5.04e-05	0.759132	11:110999578_T/G	0.000295848	-0.926969
ENSG00000106459	NRF1	7:129140033_T/A	0.000520119	-0.391098	11:111500679_CT/C	0.000130076	-0.628392
ENSG00000106554	CHCHD3	7:133097048_AG/A	0.000134182	1.24968	11:111467708_G/A	5.4e-05	-0.685556
ENSG00000106588	PSMA2	7:43231351_C/T	0.000296148	-0.42824	11:111220270_T/C	0.00021938	0.39066
ENSG00000106608	URGCP	7:43755062_CTT/C	0.000397136	-0.727134	11:111368624_C/T	2.05e-05	0.397364
ENSG00000106615	RHEB	7:151981262_G/A	0.000701777	-1.24688	11:111197887_G/A	4.83e-05	0.218595
ENSG00000106617	PRKAG2	7:151009348_G/GC	0.000391435	0.246246	11:111652829_A/G	0.000261664	1.12738
ENSG00000106682	EIF4H	7:74989645_A/G	8.17e-05	-0.34792	11:111357373_G/A	0.000136338	0.512253
ENSG00000106819	ASPN	9:92605358_AT/A	0.000369614	0.412529	11:111185802_T/C	0.000135088	1.50286
ENSG00000107021	TBC1D13	9:129477062_TA/T	0.00030599	0.255172	11:110927380_CAG/C	6.87e-06	-0.896922
ENSG00000107263	RAPGEF1	9:131754906_G/A	1.13e-05	1.35644	11:111305833_T/C	7.42e-06	-0.301712
ENSG00000107443	CCNJ	10:96283254_G/A	0.000199128	-0.777664	11:111117144_C/T	1.39e-06	0.29458
ENSG00000107566	ERLIN1	10:101010325_T/G	0.000343824	0.445279	11:111042079_C/T	9.38e-05	-0.685626
ENSG00000107815	TWNK	10:101196395_G/A	0.000175118	1.06134	11:111631216_G/A	2.84e-05	-0.794979
ENSG00000107829	FBXW4	10:101303007_C/T	7.61e-05	-0.228483	11:111278907_G/C	2.91e-05	-0.393972
ENSG00000108106	UBE2S	19:54631125_AG/A	1.57e-05	0.452264	11:111499690_C/A	7.7e-05	-0.290294
ENSG00000108231	LGI1	10:93756433_C/T	0.000802814	-1.16698	11:111243672_A/G	0.00054521	0.330879
ENSG00000108352	RAPGEFL1	17:39685314_TA/T	0.000341177	0.385888	11:110799577_AG/A	5.17e-05	-1.73465
ENSG00000108506	INTS2	17:62283372_G/A	0.000197635	-0.293634	11:111009139_C/T	0.000228869	0.309455
ENSG00000108551	RASD1	17:16531323_A/C	0.000105607	0.530375	11:111060375_T/TA	0.00011396	-1.01923
ENSG00000108622	ICAM2	17:64752255_CT/C	6.4e-05	-1.3831	11:110849963_T/A	0.000723056	-0.319728
ENSG00000108798	ABI3	17:50072467_G/A	0.00026615	-1.43969	11:110860870_A/C	0.00112455	-0.314838
ENSG00000108924	HLF	17:56011385_T/TAA	0.000270484	0.999032	11:111219754_T/C	0.000468495	-0.520546
ENSG00000109046	WSB1	17:27226506_T/TA	3.26e-05	-0.691926	11:111177650_C/T	1.28e-05	-0.655097
ENSG00000109079	TNFAIP1	17:27364898_C/T	0.00101798	-0.975336	11:111310112_T/C	4.35e-05	0.713623
ENSG00000109083	IFT20	17:27841026_G/C	0.000318147	1.25055	11:110818108_C/T	0.000951943	-0.909227
ENSG00000109111	SUPT6H	17:29014584_C/G	0.000691041	1.11494	11:111014584_T/C	2.43e-06	0.361135
ENSG00000110011	DNAJC4	11:64084161_C/A	0.000656609	0.387458	11:111456536_C/A	0.000141484	0.439742
ENSG00000110066	KMT5B	11:67688052_A/G	0.000170324	1.30387	11:111240126_TAC/T	0.000450011	-0.273301
ENSG00000110077	MS4A6A	11:60179779_C/T	2.37e-05	0.245383	11:110806102_C/T	9.62e-06	-0.801799
ENSG00000110200	ANAPC15	11:73058588_T/G	0.000642064	0.975198	11:111657687_C/G	0.000876667	0.99232
ENSG00000110497	AMBRA1	11:45851452_A/G	0.00091478	0.880267	11:111383758_C/A	0.00014371	-0.417172
ENSG00000110693	SOX6	11:15913474_C/T	0.000219269	1.26886	11:110978387_C/T	6.85e-05	-0.307257
ENSG00000110697	PITPNM1	11:67596583_GGA/G	7.27e-05	0.317782	11:111349931_T/C	1.23e-05	0.837806
ENSG00000110841	PPFIBP1	12:26805179_T/C	0.000588457	0.877202	11:111311477_C/G	6.57e-05	0.332855
ENSG00000110844	PRPF40B	12:49806116_G/A	0.000366987	-1.23803	11:111311477_C/G	0.000266026	0.305144
ENSG00000110852	CLEC2B	12:9265629_AT/A	1.75e-05	1.32842	11:111750675_C/CA	0.00135207	-0.250174
ENSG00000110880	CORO1C	12:108925866_T/A	0.000593948	0.588272	11:111442473_C/T	0.000451111	0.27002
ENSG00000110921	MVK	12:110442032_C/CA	0.000826896	-0.564636	11:111239464_A/T	2.35e-05	-0.616168
ENSG00000110934	BIN2	12:50356999_AACATACAT/A	4.54e-05	0.867222	11:111736250_A/G	4.35e-05	1.26743
ENSG00000110955	ATP5F1B	12:55761175_CA/C	0.000314192	-0.754097	11:111148207_G/GA	0.000757741	0.926159
ENSG00000110958	PTGES3	12:55851768_C/CA	0.000188061	0.876001	11:110957171_A/AC	3.83e-05	-0.307117
ENSG00000111011	RSRC2	12:122047525_G/GA	0.000606122	-0.786246	11:111278126_C/A	0.000226054	1.09618
ENSG00000111087	GLI1	12:57592583_G/A	0.00020247	-0.5152	11:111349931_T/C	5.79e-05	1.37302
ENSG00000111252	SH2B3	12:111318592_CTT/C	0.000650534	0.656531	11:111411392_GA/G	5.93e-05	-0.64705
ENSG00000111271	ACAD10	12:112072628_GA/G	0.000656807	1.24289	11:111698462_G/C	0.000425265	0.686235
ENSG00000111358	GTF2H3	12:123548272_A/G	0.000322726	0.421575	11:111356452_G/C	0.000185137	1.61068
ENSG00000111361	EIF2B1	12:122750328_T/TA	0.000108814	-0.617815	11:111388280_AGTTG/A	1.52e-05	0.320691
ENSG00000111452	ADGRD1	12:131191209_C/T	0.000271101	1.43793	11:110931404_G/A	0.000311683	0.343148
ENSG00000111540	RAB5B	12:56205479_C/T	0.000260893	1.13706	11:111055215_A/G	0.000151253	-0.700281
ENSG00000111602	TIMELESS	12:56443632_C/T	0.00025789	-0.329348	11:110792294_G/A	4.54e-05	-0.941728
ENSG00000111605	CPSF6	12:69349291_C/T	4.26e-05	-0.405936	11:111379540_T/C	6.07e-06	0.642412
ENSG00000111640	GAPDH	12:6793970_A/ATATCTATCTATCTATCTATC	0.000433315	-0.582879	11:110792924_T/C	0.000857302	-0.229894
ENSG00000111642	CHD4	12:6446776_T/TCA	0.000171248	0.341134	11:111197637_C/T	0.000114388	0.490215
ENSG00000111726	CMAS	12:22955465_C/T	0.000125018	0.308371	11:111289904_A/C	5.56e-05	0.320939
ENSG00000111790	FGFR1OP2	12:26232368_C/CT	0.00013577	0.466764	11:111213456_G/T	9.53e-05	0.364732
ENSG00000111859	NEDD9	6:10857761_CACACACACACACACACACACACACACACACACACAT/C	0.00015004	0.48854	11:111312761_A/G	0.000653939	0.510523
ENSG00000111879	FAM184A	6:119914594_C/T	0.00152286	-0.413236	11:111506101_C/T	0.00086508	-0.829523
ENSG00000112182	BACH2	6:90001193_C/G	0.000316318	-1.25105	11:111181400_G/T	3.45e-05	1.33349
ENSG00000112195	TREML2	6:40386950_C/T	0.000641891	0.900705	11:111523518_T/C	0.000561941	-1.36622
ENSG00000112214	FHL5	6:96701655_A/G	0.000369982	-0.2675	11:110898185_C/T	0.000102452	-0.481661
ENSG00000112293	GPLD1	6:24416692_T/C	0.000132	-0.810141	11:111022030_G/T	7.13e-05	-0.384894
ENSG00000112306	RPS12	6:132974612_C/A	0.000519072	1.37423	11:111325286_C/T	0.000215943	-0.386592
ENSG00000112320	SOBP	6:107155975_C/T	0.000238192	-0.384598	11:111178964_A/C	0.000136591	-0.265555
ENSG00000112335	SNX3	6:109205184_TA/T	0.000252541	0.571147	11:111412560_G/A	6.13e-05	-0.737901
ENSG00000112759	SLC29A1	6:43483124_TAA/T	7.29e-05	1.37288	11:110813739_G/C	0.000430149	-0.322433
ENSG00000112983	BRD8	5:137872127_T/C	0.000183433	0.777234	11:110909913_TTG/T	6.84e-05	-0.462618
ENSG00000113073	SLC4A9	5:140614618_C/CT	0.000505056	1.20955	11:111493299_C/T	0.000187249	1.15204
ENSG00000113194	FAF2	5:176511217_G/A	0.000506261	-0.470374	11:110796752_TAAAACAAAAC/T	2.8e-05	-0.426777
ENSG00000113319	RASGRF2	5:80949094_C/T	1.78e-05	-0.350256	11:111299719_G/A	1.78e-05	0.827731
ENSG00000113532	ST8SIA4	5:100495926_TA/T	0.000132634	-0.676154	11:111247181_T/C	6.46e-05	0.491123
ENSG00000113575	PPP2CA	5:134235829_C/CT	0.000113571	-0.904205	11:111177973_CT/C	4.23e-05	-0.421555
ENSG00000113578	FGF1	5:142671452_A/C	0.000455907	-1.28743	11:110850464_G/A	0.000121848	-0.265906
ENSG00000113643	RARS1	5:168088199_C/T	0.000371914	-0.81516	11:111244069_C/T	0.000234482	-1.27688
ENSG00000113722	CDX1	5:149991722_G/GTTATTATTATTA	0.000237927	1.00251	11:111439834_A/G	7.39e-05	0.3705
ENSG00000113732	ATP6V0E1	5:173029873_G/A	0.000128371	0.236751	11:111430282_G/A	0.000111147	0.317331
ENSG00000113742	CPEB4	5:173480964_C/T	0.000338087	-1.31473	11:111183599_A/G	0.00017297	-0.351808
ENSG00000113916	BCL6	3:188166724_C/A	0.000181276	-0.263786	11:111227014_G/C	5.87e-05	-1.09798
ENSG00000114013	CD86	3:121383005_G/C	2.14e-05	-0.406993	11:111052054_T/C	1.3e-06	0.723605
ENSG00000114302	PRKAR2A	3:48209725_T/TTA	0.000781898	-0.650439	11:111048705_A/AT	0.000235479	0.623041
ENSG00000114315	HES1	3:193858138_A/T	0.000754973	0.405659	11:110998256_G/A	7.4e-05	0.980891
ENSG00000114353	GNAI2	3:50334001_C/A	0.00154494	0.222152	11:111671964_G/A	6.54e-05	0.500961
ENSG00000114648	KLHL18	3:47715187_C/T	9.62e-05	1.42307	11:110800715_GT/G	1.69e-05	1.03074
ENSG00000114654	EFCC1	3:129012760_G/A	0.000189999	-0.298165	11:111148076_G/A	9.1e-07	-0.827246
ENSG00000114656	CFAP92	3:128889178_A/C	0.000190243	0.813917	11:111736566_G/A	6.41e-05	0.494942
ENSG00000114686	MRPL3	3:132318381_T/C	0.000246954	0.370038	11:111034339_T/C	0.000596758	-0.416806
ENSG00000114737	CISH	3:49880229_ATT/A	0.000307401	1.25354	11:111184419_T/C	0.000356598	0.454955
ENSG00000114902	SPCS1	3:52834652_G/GCACACACACA	0.00196166	0.527262	11:110956471_C/G	6.94e-05	-0.604663
ENSG00000114933	INO80D	2:206534964_C/CT	2.26e-05	-0.686665	11:111410341_G/A	1.36e-06	0.625329
ENSG00000114982	KANSL3	2:97171976_T/C	0.000563557	0.811124	11:111232394_T/A	0.00020837	0.328575
ENSG00000115170	ACVR1	2:157544135_C/T	0.00040904	-1.22843	11:111567982_CTGAG/C	0.000601866	-0.270201
ENSG00000115207	GTF3C2	2:27928967_A/G	0.000471379	0.596864	11:111331574_G/A	0.000166439	0.803245
ENSG00000115211	EIF2B4	2:26673079_A/G	6.61e-05	0.391969	11:111522822_T/TA	1.78e-05	0.755423
ENSG00000115317	HTRA2	2:74307937_G/A	9.73e-05	-0.80876	11:111718997_C/T	8.38e-05	1.34504
ENSG00000115325	DOK1	2:74124941_G/A	5.18e-05	1.14915	11:110806102_C/T	0.000161675	-0.924308
ENSG00000115380	EFEMP1	2:56033226_C/CTT	0.000331605	1.06785	11:110957723_G/A	0.000503652	0.396757
ENSG00000115539	PDCL3	2:100129382_C/CTGTGTGTGTGTG	4.94e-05	1.32493	11:110955346_G/A	8.56e-06	0.43001
ENSG00000115556	PLCD4	2:219407610_GA/G	3.92e-06	0.558383	11:110957627_C/T	0.000389357	-0.393647
ENSG00000115839	RAB3GAP1	2:135138610_A/AT	0.000516164	-0.675443	11:111756975_A/G	0.000476005	1.51126
ENSG00000115919	KYNU	2:142858620_C/T	8.73e-05	0.54876	11:111399656_G/A	5.04e-05	1.32334
ENSG00000115963	RND3	2:150917579_G/A	0.000404766	0.245037	11:111011997_A/C	0.000134213	0.368038
ENSG00000116001	TIA1	2:69488149_C/CGTGTGTGTGTGT	0.000417719	-1.10014	11:111266612_A/G	0.00179832	-1.08123
ENSG00000116132	PRRX1	1:170437310_G/A	0.000294956	-1.02692	11:111148076_G/A	0.000256469	0.90763
ENSG00000116273	PHF13	1:6329490_AT/A	7.25e-05	0.811134	11:111210866_C/T	7.12e-05	0.30993
ENSG00000116337	AMPD2	1:109707641_C/T	0.00248327	-0.834424	11:110867123_C/T	0.000208187	1.2731
ENSG00000116478	HDAC1	1:31336832_GTT/G	0.000304294	-0.925165	11:111071749_G/A	1.05e-05	0.484547
ENSG00000116521	SCAMP3	1:155475337_G/A	0.00012504	0.630692	11:111186995_T/A	3.31e-05	0.286097
ENSG00000116560	SFPQ	1:34887407_TAA/T	0.000280963	-1.13133	11:110895092_A/G	0.000123877	0.387829
ENSG00000116668	SWT1	1:184361238_G/A	0.000223569	-0.262286	11:111470564_C/T	7.75e-05	0.3676
ENSG00000116670	MAD2L2	1:12396991_T/C	1.33e-05	0.531872	11:111324554_C/T	4.28e-06	-1.22205
ENSG00000116754	SRSF11	1:69274933_C/T	0.00109297	0.867353	11:110922887_C/T	0.000448163	-1.28901
ENSG00000116761	CTH	1:69813469_T/C	0.00010121	-0.577186	11:111054979_T/C	8.88e-06	-0.274909
ENSG00000116786	PLEKHM2	1:15063682_C/T	0.000152841	0.394892	11:111097156_G/A	5.51e-05	-0.550172
ENSG00000116833	NR5A2	1:200029363_C/G	0.000621653	-0.392858	11:111443996_C/T	0.000224162	0.400092
ENSG00000116871	MAP7D1	1:36657003_T/TTATCTATC	0.000255073	0.877407	11:110884055_CT/C	0.000423906	-0.685324
ENSG00000117020	AKT3	1:243173065_CT/C	7.57e-05	0.635	11:111180823_C/T	0.000703593	-0.529226
ENSG00000117090	SLAMF1	1:161064757_AAGAG/A	4.54e-05	1.20738	11:110819683_A/G	4.42e-05	-0.291782
ENSG00000117118	SDHB	1:17202362_C/T	0.000108109	-0.921012	11:111210866_C/T	7.26e-07	-0.383722
ENSG00000117407	ARTN	1:42953279_C/T	0.000836361	-1.04326	11:111240102_T/A	0.000304948	0.49663
ENSG00000117408	IPO13	1:43157209_C/G	0.000423544	-0.254171	11:111425054_T/C	0.000257239	-0.303215
ENSG00000117419	ERI3	1:43672191_C/CT	0.000134775	0.753148	11:111358446_A/ACACT	4.37e-07	1.23459
ENSG00000117479	SLC19A2	1:168576791_C/A	0.000264754	-1.26647	11:111248445_A/T	0.00024448	-0.646424
ENSG00000117523	PRRC2C	1:172343389_TA/T	5.61e-05	0.807599	11:111073594_A/G	1.73e-05	-0.911633
ENSG00000117543	DPH5	1:100821637_G/A	6.88e-05	1.17956	11:111617850_GTA/G	0.000497759	-0.778946
ENSG00000117650	NEK2	1:211064566_A/G	8.07e-05	-1.0404	11:111657687_C/G	0.000120142	1.14131
ENSG00000117713	ARID1A	1:27001704_CA/C	0.000526404	0.526923	11:111043488_GAC/G	4.49e-05	-0.886881
ENSG00000117724	CENPF	1:214417032_C/A	2.43e-05	-1.53132	11:111311177_C/CGTGT	6.03e-05	1.18846
ENSG00000117758	STX12	1:27667306_C/T	0.00029678	1.2566	11:111400157_G/C	3.98e-05	-0.400966
ENSG00000118257	NRP2	2:204779186_C/T	2.35e-05	1.45952	11:110819683_A/G	6.14e-06	0.446575
ENSG00000118308	LRMP	12:24042114_T/A	2.47e-05	-0.408357	11:111300019_C/T	5.42e-21	0.535457
ENSG00000118482	PHF3	6:62857785_CT/C	0.00107193	0.353759	11:111009237_G/T	5.07e-05	0.328256
ENSG00000118620	ZNF430	19:21585171_T/G	0.000906926	0.989579	11:110865099_A/C	0.0004783	0.422818
ENSG00000118655	DCLRE1B	1:113065635_C/T	0.000116808	0.277857	11:111177650_C/T	6.92e-05	0.598936
ENSG00000118785	SPP1	4:87975645_T/G	7.67e-05	-0.341964	11:111380036_A/G	5.84e-05	1.08987
ENSG00000118898	PPL	16:5458097_C/G	1.88e-05	1.08835	11:111197972_C/T	2.85e-05	-0.317384
ENSG00000118946	PCDH17	13:57769864_T/A	0.00014827	-0.503015	11:111552153_A/C	3.35e-05	-0.775363
ENSG00000119396	RAB14	9:121220409_T/TCTTCCCATACTTTCTGTCACTGTGTACCC	0.000121195	-0.21885	11:111443799_G/C	0.000116841	0.353903
ENSG00000119574	ZBTB45	19:57622958_TACAC/T	0.000364911	-0.499801	11:111642852_C/G	0.00025717	1.04193
ENSG00000119699	TGFB3	14:75237442_CCA/C	0.000510405	0.401687	11:111247179_CAT/C	0.000223305	0.363224
ENSG00000120053	GOT1	10:99848765_C/G	0.000180082	-0.359562	11:110911210_A/T	0.000148765	1.00256
ENSG00000120265	PCMT1	6:149633100_A/AT	2.77e-05	-0.293255	11:111444441_C/A	0.00011652	0.39993
ENSG00000120279	MYCT1	6:153239287_G/GA	0.00015049	-1.12544	11:111380036_A/G	0.000157267	-1.02911
ENSG00000120656	TAF12	1:29343584_T/A	0.00014089	-0.339867	11:111072686_C/T	7.8e-05	0.43815
ENSG00000120688	WBP4	13:41113708_T/TG	0.000497645	0.576965	11:110963258_G/A	0.000613445	0.265814
ENSG00000120738	EGR1	5:138547700_CT/C	0.000365812	0.568008	11:111472524_A/T	0.000254464	-0.858945
ENSG00000120948	TARDBP	1:10961896_G/A	2.21e-05	1.20211	11:111412945_A/C	1.57e-05	-0.345026
ENSG00000121022	COPS5	8:67275250_T/TAG	0.000157695	1.62689	11:111513701_T/G	1.75e-07	-0.670643
ENSG00000121060	TRIM25	17:56440882_TA/T	0.000738345	-0.61688	11:111529404_G/A	0.000120455	-0.878191
ENSG00000121104	FAM117A	17:49580261_T/G	0.000331528	-1.02385	11:111501706_T/C	2.86e-05	1.34623
ENSG00000121152	NCAPH	2:96162631_GT/G	0.000651334	-0.622967	11:111435762_C/G	1.97e-05	0.573245
ENSG00000121579	NAA50	3:113767659_CT/C	0.000463414	0.597614	11:111331574_G/A	0.000587739	-0.735575
ENSG00000121753	ADGRB2	1:32102168_GA/G	6.53e-05	1.13433	11:111194137_T/G	1.29e-05	0.488252
ENSG00000121851	POLR3GL	1:145129676_A/G	0.000235019	-1.04826	11:110857534_C/T	0.00052317	-0.395595
ENSG00000121905	HPCA	1:32887381_G/A	0.000764634	-1.17153	11:110906144_G/A	0.000165618	0.798967
ENSG00000121957	GPSM2	1:107954534_AT/A	7.68e-05	0.491647	11:111172936_C/T	0.000465406	1.21691
ENSG00000121966	CXCR4	2:136421843_G/A	0.000288358	-0.64785	11:111570822_A/C	0.000302864	0.956592
ENSG00000122068	FYTTD1	3:197139701_C/T	0.000168093	1.11757	11:111324554_C/T	7.17e-05	0.66258
ENSG00000122435	TRMT13	1:100865088_C/T	0.000404512	0.84959	11:111101772_GA/G	0.000194435	0.288965
ENSG00000122641	INHBA	7:42018080_C/T	0.000265358	0.512315	11:111671782_A/G	1.78e-05	-0.431387
ENSG00000122861	PLAU	10:74770035_C/G	0.00110352	0.805862	11:110906144_G/A	6.3e-05	-0.69725
ENSG00000122986	HVCN1	12:110751998_A/G	3.87e-05	1.26904	11:111652829_A/G	0.00020095	-0.983388
ENSG00000123091	RNF11	1:51431451_C/CT	0.00153907	-0.652374	11:111295703_CA/C	7.46e-05	-0.542084
ENSG00000123154	WDR83	19:12823459_A/AT	4.26e-05	0.71795	11:111437671_C/T	6.64e-05	-0.726971
ENSG00000123338	NCKAP1L	12:55433279_T/C	0.000473219	-0.258115	11:111236312_T/C	0.000430813	-0.549285
ENSG00000123342	MMP19	12:55367979_C/A	0.00016458	1.30674	11:111091242_T/C	0.000806539	-1.10137
ENSG00000123360	PDE1B	12:54373829_C/T	0.000280748	-0.315778	11:111461988_G/C	0.000114895	0.431986
[truncated: 1,105 more rows]
