# Supplementary material for: Genetic variation at 11q23.1 confers colorectal cancer risk by dysregulation of colonic tuft cell transcriptional activator POU2AF2
Source: Gut. 2024 Nov 28;74(5):e332121. doi: 10.1136/gutjnl-2024-332121 (PMC12013567; doi:10.1136/gutjnl-2024-332121)
Supplement: online supplemental file 16 [file gutjnl-74-5-s016.xlsx]

## Sheet: Contents_Supplementary_Tables
Table S1	Colocalisation analysis of 11q23.1 cis-eQTL target expression and CRC risk
Table S2	Credible sets of variants from colocalisation analysis
Table S3	Conditional analysis of rs3087967 fo POU2AF2, COLCA1 and POU2AF3 expression
Table S4	rs3087967 trans-eQTL targets in GTEx transverse colon
Table S5	rs3087967 trans-eQTL targets in in-house RNAseq (SOCCS)
Table S6	rs3087967 trans-eQTL targets in INTERMPHEN rectum
Table S7	11q23.1 trans-eQTL targets identified as putative tuft cell markers
Table S8	Trans-eQTL targets demarcating scATACseq cluster 5
Table S9	Apcmin/+Pou2af2 mouse generation
Table S10	Apcmin/+Pou2af3 mouse generation
Table S11	Public datasets access codes
Table S12	Patient metadata
Table S13	CRISPR guide RNA sequences
Table S14	Antibody details

## Sheet: Table_S1
Hypothesis	Description	PP.POU2AF2	PP.COLCA1	PP.POU2AF3
H0	neither trait has a genetic association in the region	4.42e-73	7.12e-71	1.69e-90
H1	only gene has a genetic association in the region	3.04e-52	2.17e-53	1.37e-54
H2	only CRC risk has a genetic association in the region	1.31e-22	2.11e-20	5.01e-40
H3	both traits are associated, but with different causal variants	1.31e-22	0.00633	0.000307
H4	both traits are associated and share a single causal variant	0.91	0.994	1
Colocalisation analysis reinforces the intersection of CRC risk-association and eQTL effects at a single 11q23.1 variant. Posterior probability (PP) for each global hypothesis calculated by colocalisation analysis11. Tests were performed in a pairwise manner between 11q23.1 cis-eQTLs for expression of each target gene and CRC risk.

## Sheet: Table S2
POU2AF2				COLCA1				POU2AF3
rsid	position	SNP.PP.H4		rsid	position	SNP.PP.H4		rsid	position	SNP.PP.H4
rs3087967	111286111	0.751365		rs7130173	111283347	0.462317		rs3087967	111286111	0.986104
rs7130173	111283347	0.0607709		rs3087967	111286111	0.434076
rs10789822	111291966	0.0356172		rs10789822	111291966	0.0410364
rs4608113	111301454	0.0246556		rs4477469	111290028	0.0146982
rs10891246	111299815	0.0235445		rs7103178	111294284	0.013865
rs7122375	111300346	0.0202249
rs4520624	111301485	0.0134977
rs4477469	111290028	0.0127571
rs3802842	111300984	0.0125053
rs7103178	111294284	0.012034
rs3087967 is best associated with the shared genetic association of 11q3.1 cis-eQTL targets and CRC risk. 95% credible sets from colocalisation analysis11 between cis-eQTLs and CRC risk (Supplementary Table S1). rs3087967 is the only variant common to all three sets.

## Sheet: Table_S3
POU2AF2
SNP	rsid	freq	b	se	p	bC	bC_se	pC
chr11_110469657_A_AT_b38	rs376730691	0.0313351	0.737286	0.209443	0.0684459	0.619123	0.179496	0.000562175
chr11_111411904_A_G_b38	rs11213878	0.282016	-0.373346	0.0844129	0.00326974	-0.238947	0.0727704	0.001025
chr11_111411694_G_C_b38	rs4938546	0.211172	0.367612	0.0943124	0.0211532	0.233345	0.0812523	0.00408076
chr11_111247019_C_A_b38	rs11213799	0.231608	0.426682	0.080765	9.38e-05	0.200781	0.0703339	0.00430805
chr11_111247113_C_T_b38	rs35759288	0.231608	0.426682	0.080765	9.38e-05	0.200781	0.0703339	0.00430805
chr11_111245754_G_A_b38	rs1568202	0.234332	0.413589	0.0796905	0.00013615	0.187491	0.0694237	0.00691971
chr11_111250395_C_T_b38	rs7939539	0.200272	0.476826	0.0823285	7.77e-06	0.187657	0.0722231	0.00936883
chr11_111250082_C_G_b38	rs7939167	0.27248	0.402542	0.077661	0.00013985	0.175566	0.0677097	0.00951635
chr11_111246412_A_T_b38	rs12803934	0.20436	0.484305	0.0826991	5.52e-06	0.186858	0.0726158	0.0100752
chr11_110347815_C_G_b38	rs55770928	0.0313351	0.608055	0.201227	0.244004	0.434167	0.17293	0.0120506
COLCA1
SNP	rsid	freq	b	se	p	bC	bC_se	pC
chr11_111427974_C_T_b38	rs4938597	0.196185	0.523488	0.0942491	2.64e-05	0.373699	0.0826657	6.17e-06
chr11_111420812_C_A_b38	rs61896853	0.208447	0.514431	0.0907082	1.45e-05	0.350792	0.079715	1.08e-05
chr11_111434036_C_A_b38	rs11213894	0.365123	0.289176	0.0771235	0.033446	0.272765	0.0671513	4.87e-05
chr11_111436183_C_T_b38	rs7930326	0.192098	0.494984	0.096035	0.00015848	0.340123	0.0843058	5.47e-05
chr11_111411694_G_C_b38	rs4938546	0.211172	0.455435	0.0932566	0.00051337	0.326629	0.0817315	6.43e-05
chr11_111404525_T_C_b38	rs4938535	0.217984	0.467149	0.0900747	0.00013817	0.312238	0.0791479	7.98e-05
chr11_111408402_G_A_b38	rs56180416	0.216621	0.471262	0.0900724	0.00011459	0.307032	0.0792172	0.00010626
chr11_111430319_G_A_b38	rs10891268	0.212534	0.434876	0.0916307	0.00093557	0.306738	0.0803357	0.00013443
chr11_111416620_G_A_b38	rs4259858	0.455041	-0.309632	0.0740812	0.00811092	-0.246259	0.0647323	0.00014222
chr11_111415796_T_G_b38	rs4261318	0.448229	-0.307404	0.0736468	0.00823865	-0.244321	0.064354	0.00014674
POU2AF3
SNP	rsid	freq	b	se	p	bC	bC_se	pC
chr11_111946111_AT_A_b38	chr11:111946111	0.0762943	0.456568	0.141541	0.151988	0.441	0.1108	6.89e-05
chr11_111420812_C_A_b38	rs61896853	0.208447	0.481354	0.0912042	9.62e-05	0.275457	0.0721857	0.00013566
chr11_111427974_C_T_b38	rs4938597	0.196185	0.473909	0.0949651	0.00032097	0.285439	0.0750147	0.00014175
chr11_111434036_C_A_b38	rs11213894	0.365123	0.249949	0.0774982	0.152125	0.229301	0.0607354	0.00015975
chr11_111411904_A_G_b38	rs11213878	0.282016	-0.40568	0.0840031	0.00065025	-0.243453	0.0663585	0.00024373
chr11_111411694_G_C_b38	rs4938546	0.211172	0.426659	0.0936287	0.00190857	0.264591	0.0738853	0.00034215
chr11_111430319_G_A_b38	rs10891268	0.212534	0.415501	0.0918767	0.00219964	0.254274	0.0725292	0.00045522
chr11_111412385_GTTTC_G_b38	rs115959381	0.392371	-0.319994	0.0749003	0.00570212	-0.206901	0.0590425	0.00045785
chr11_111410183_C_CT_b38	chr11:111410183	0.350136	-0.366645	0.0835582	0.00373926	-0.230737	0.0659121	0.00046407
chr11_111404257_T_C_b38	rs11213876	0.386921	-0.360637	0.075306	0.00078298	-0.207545	0.0595607	0.00049286
rs3087967 association with 11q23.1 cis-eQTL expression is likely representative of a single genetic signal. Conditional analysis results of associations between 11q23.1 variants and 11q23.1 cis-eQTL expression, conditional of rs3087967 genotype. No variant conditional pvalue (pC) falls below genome-wide significance threshold of 5e-7 and so is not considered to be independent of rs3087967. freq=m…

## Sheet: Table_S4
gene	hSYMBOL	statistic	pvalue	FDR	beta
ENSG00000070985	TRPM5	7.84529	4.82e-14	1.39e-06	0.577615
ENSG00000137709	POU2F3	7.83068	5.33e-14	1.39e-06	0.576694
ENSG00000152292	SH2D6	7.53368	3.92e-13	3.34e-06	0.557815
ENSG00000183476	SH2D7	7.26222	2.32e-12	9.03e-06	0.540293
ENSG00000186038	HTR3E	6.89252	2.42e-11	5.67e-05	0.516031
ENSG00000180347	CCDC129	6.8884	2.48e-11	5.69e-05	0.515758
ENSG00000127074	RGS13	6.80823	4.08e-11	8.01e-05	0.510435
ENSG00000118308	LRMP	6.56279	1.81e-10	0.00022824	0.494008
ENSG00000127588	GNG13	6.53266	2.17e-10	0.00027008	0.491978
ENSG00000207207	NA	6.38782	5.13e-10	0.00048104	0.482178
ENSG00000167759	KLK13	5.90382	8.13e-09	0.00408042	0.448947
ENSG00000007264	MATK	5.72068	2.21e-08	0.00836154	0.436183
ENSG00000168269	FOXI1	5.65443	3.16e-08	0.0111247	0.431541
ENSG00000197444	OGDHL	5.59391	4.36e-08	0.0145402	0.427289
ENSG00000135407	AVIL	5.42172	1.08e-07	0.0279905	0.415131
ENSG00000163106	HPGDS	5.38736	1.28e-07	0.0322079	0.412694
Replication of several rs3087967 trans-eQTL targets in GTEx Colon Transverse RNAseq. Trans-eQTL target results of rs3087967. Red=FDR<0.05 in previous study6. Positive beta values indicate greater expression in non-risk genotype samples.

## Sheet: Table_S5
gene	hSYMBOL	statistic	pvalue	FDR	beta
ENSG00000137709	POU2F3	10.442	5.25e-21	9.3e-14	0.887531
ENSG00000180347	CCDC129	9.97849	1.35e-19	8.21e-13	0.860563
ENSG00000102010	BMX	9.56622	2.31e-18	7.54e-12	0.835577
ENSG00000152292	SH2D6	9.29412	1.47e-17	4.2e-11	0.818558
ENSG00000183476	SH2D7	9.22588	2.33e-17	5.83e-11	0.814224
ENSG00000070748	CHAT	9.16935	3.41e-17	6.77e-11	0.810613
ENSG00000186038	HTR3E	8.73087	6.28e-16	7.18e-10	0.781974
ENSG00000070985	TRPM5	8.43899	4.22e-15	3.74e-09	0.762285
ENSG00000160862	AZGP1	7.72322	3.91e-13	2.77e-07	0.711864
ENSG00000197444	OGDHL	7.58993	8.87e-13	6e-07	0.702137
ENSG00000271615	ACTG1P22	7.5605	1.06e-12	6.98e-07	0.699974
ENSG00000135407	AVIL	7.29635	5.25e-12	3.18e-06	0.680335
ENSG00000167759	KLK13	7.08762	1.81e-11	9.79e-06	0.664519
ENSG00000118308	LRMP	6.91302	5.02e-11	2.54e-05	0.65109
ENSG00000152229	PSTPIP2	6.2944	1.64e-09	0.00067163	0.602047
ENSG00000105851	PIK3CG	5.86006	1.67e-08	0.00594822	0.566268
ENSG00000197943	PLCG2	5.71841	3.47e-08	0.0121312	0.554363
ENSG00000169962	TAS1R3	5.70868	3.64e-08	0.0125582	0.553542
Replication of several rs3087967 trans-eQTL targets in SOCCS RNAseq (n=223). Trans-eQTL target results of rs3087967. Red=FDR<0.05 in previous study6, _=rs3087967 trans-eQTL target in GTEx transverse colon (Supplementary Table S4). Positive beta values indicate greater expression in non-risk genotype samples.

## Sheet: Table_S6
gene	hSYMBOL	statistic	pvalue	FDR	beta
ENSG00000152292	*SH2D6	7.766	5.68e-12	1.12e-05	0.899306
ENSG00000183476	*SH2D7	7.19616	9.59e-11	0.0001181	0.855676
ENSG00000102010	*BMX	6.5975	1.74e-09	0.00114149	0.806004
ENSG00000186038	*HTR3E	6.27827	7.84e-09	0.00382475	0.777843
ENSG00000118308	*LRMP	6.12788	1.58e-08	0.00647811	0.764163
ENSG00000182272	B4GALNT4	5.66417	1.3e-07	0.0390467	0.720286
ENSG00000169962	*TAS1R3	5.60883	1.66e-07	0.0441263	0.714877
Replication of several rs3087967 trans-eQTL targets in INTERMPHEN rectum RNAseq5. Trans-eQTL target results of rs3087967, n=109. Red=FDR<0.05 in previous study6, _=rs3087967 trans-eQTL target in GTEx transverse colon (Supplementary Table S4). *=rs3087967 trans-eQTL target in SOCCS RNAseq (Supplementary Table S5). Positive beta values indicate greater expression in non-risk genotype samples.

## Sheet: Table_S7
gene	p_val	avg_log2FC	pct.1	pct.2	p_val_adj	cluster
AZGP1	0	2.57354	0.72	0.029	0	Tuft
SH2D6	0	2.43533	0.736	0.007	0	Tuft
HCK	0	1.96825	0.597	0.004	0	Tuft
AVIL	2.13345e-278	1.04049	0.39	0.044	3.16667e-274	Tuft
HPGDS	5.69441e-259	1.67824	0.425	0.002	8.45221e-255	Tuft
MATK	2.88437e-240	1.37102	0.406	0.003	4.28126e-236	Tuft
SH2D7	2.50324e-235	1.20591	0.393	0.002	3.71557e-231	Tuft
TRPM5	1.32162e-214	0.949727	0.377	0.004	1.96167e-210	Tuft
PLCG2	1.22333e-209	0.98216	0.365	0.002	1.81579e-205	Tuft
PSTPIP2	2.20668e-197	0.876132	0.333	0.004	3.27538e-193	Tuft
HTR3E	4.86081e-184	0.868438	0.308	0.001	7.2149e-180	Tuft
Eleven 11q23.1 CRC-associated trans-eQTL targets demarcate human colonic tuft cells. Trans-eQTL targets that were identified as tuft cell markers by our previous analysis of healthy human epithelial scRNAseq7.

## Sheet: Table_S8
name	seqnames	start	end	strand	Log2FC	FDR	MeanDiff
PLCG2	chr16	81739097	81962693	1	1.71229	1.3836e-08	1.12102
LRMP	chr12	25033759	25108334	1	2.68433	4.1723e-07	0.495241
HCK	chr20	32052188	32101856	1	2.85936	3.83708e-06	0.515681
PSTPIP2	chr18	46072272	45983536	2	2.14323	7.45873e-06	0.523054
PIK3CG	chr7	106865278	106907145	1	1.94538	0.000525956	0.42188
TRPM5	chr11	2423045	2404515	2	1.64056	0.0158494	0.359406
HTR3E	chr3	184097064	184106995	1	4.02592	0.0298564	0.219986
CHAT	chr10	49609095	49665104	1	1.74605	0.0635066	0.41148
HPGDS	chr4	94342876	94298535	2	1.21733	0.074563	0.160293
KLK13	chr19	51065114	51056206	2	2.00569	0.100712	0.0774419
SH2D6	chr2	85418721	85437029	1	0.599301	0.316099	0.358737
RGS13	chr1	192636138	192660306	1	0.929493	0.323077	0.106217
B4GALNT4	chr11	369796	382116	1	1.29077	0.366234	0.21058
SH2D7	chr15	78077808	78104909	1	0.678668	0.401125	0.321267
TAS1R3	chr1	1331314	1335306	1	0.660979	0.702135	0.152251
MATK	chr19	3802129	3777970	2	1.15203	0.722595	0.0534117
POU2F3	chr11	120236640	120319944	1	0.318655	0.769391	0.124052
AVIL	chr12	57818704	57797376	2	1.1205	0.815595	0.172639
AZGP1	chr7	99976157	99966720	2	1.03214	0.856338	0.231614
Several 11q23.1 trans-eQTL targets demarcate colonic tuft cell chromatin accessibility profile. Differential accessibility results for refined trans-eQTL targets in tuft cell cluster (cluster 5), calculated by wilcoxon test of entire gene region accessibility in cluster 5 compared to all other clusters. Results filtered for log2FC>0.5. FDR=False Discovery Rate corrected p-value.

## Sheet: Table_S9
Genotype	Expected (%)	Expected (frequency)	Observed (frequency)	Observed (%)
Wild-type	13.3396	17.875	17	12.6866
ApcMin/+Pou2af2+/+	13.3396	17.875	22	16.4179
Pou2af2+/-	27.7985	37.25	44	32.8358
ApcMin/+Pou2af2+/-	27.7985	37.25	41	30.597
Pou2af2-/-	8.86194	11.875	5	3.73134
ApcMin/+Pou2af2-/-	8.86194	11.875	5	3.73134
ApcMin/+ Pou2af2-/- mice are significantly under-represented in breeding crosses. Expected and observed frequencies of genotypes from matings between ApcMin/+Pou2af2+/- and Pou2af2+/- (n=12), ApcMin/+ and Pou2af2-/- (n=2), ApcMin/+Pou2af2+/- and wild-type (n=3), ApcMin/+Pou2af2+/- and Pou2af2-/- (n=2), ApcMin/+ and Pou2af2+/- (n=4). Chi-squared test p-value=0.06

[truncated: 6 more sheets: Table S10, Table_S11, Table_S12, Table_S13, Table_S14, Sheet1]
